# Supplementary material for: Engineering synthetic signaling receptors to enable erythropoietin-free erythropoiesis
Source: Nat Commun. 2025 Jan 29;16:1140. doi: 10.1038/s41467-025-56239-5 (PMC11779867; doi:10.1038/s41467-025-56239-5)
Supplement: Supplementary file 3 — Supplementary Data 1 [file 41467_2025_56239_MOESM3_ESM.xlsx]

## Sheet: TPM_Exp_Mat_Set1_No_Isoforms
	Mock d0 Replicate 1	Mock d0 Replicate 2	Mock d0 Replicate 3	Mock d14 Replicate 1	Mock d14 Replicate 2	Mock d14 Replicate 3	PGK(synEPOR) d14 Replicate 1	PGK(synEPOR) d14 Replicate 2	PGK(synEPOR) d14 Replicate 3	HBA1(synEPOR) d14 Replicate 1	HBA1(synEPOR) d14 Replicate 2	HBA1(synEPOR) d14 Replicate 3	HBA1(synEPOR) d14 Replicate 4	EPOR(synEPOR) d14 Replicate 1	EPOR(synEPOR) d14 Replicate 2	EPOR(synEPOR) d14 Replicate 3
A1BG	0	0	0	0	0	0	0	0	0	0	0	0	0	0	0	0.034951
A1CF	0	0	0	0	0	0	0	0	0	0	0	0	0	0	0	0
A2M	0	0	1.07511	0.081065	0	0.003422	0.019782	0.013158	0.142721	0.016196	0	0.020114	0.189753	0.060723	0.011649	0.082979
A2ML1	0	0	0	0.055718	0.065565	0.039759	0.132515	0.04569	0.072892	0.073047	0.210616	0.141691	0.020382	0.036179	0.062473	0.022927
A3GALT2	0.54339	2.19501	0	0	0.023454	0	0	0	0.116208	0	0	0	0	0	0	1.07645
A4GALT	0.231598	0	0.887306	22.0696	1.44852	1.06819	30.0926	33.5298	7.21474	57.9728	12.131	10.1848	42.8901	30.7431	2.30985	2.67559
A4GNT	0	0	0	0	0.011716	0	0	0	0	0	0	0	0	0	0	0
AAAS	0	0	0	0.188144	0.358908	0	0	0.634793	0.29581	1.35688	0.951236	0	2.9325	0.72722	0	0
AACS	0.478607	0.754776	2.35351	1.0243	1.55793	1.43889	6.0737	5.31529	9.35723	5.44302	22.1711	19.8712	9.88476	4.01786	4.18796	5.32384
AADAC	0	0	0	0	0	0	0	0	0	0	0	0	0	0	0	0
AADACL2	0	0	0	0	0	0	0	0	0	0	0	0	0	0	0	0
AADACL3	0	0	0	0	0	0	0	0	0	0	0	0	0	0	0	0
AADACL4	0	0	0	0	0.020127	0	0	0	0	0	0	0	0	0	0.028656	0.130043
AADAT	0	0	0.322967	0.054693	0	0	0.019787	0.043233	0	0	0	0	0	0	0	0.016495
AAGAB	0.277785	0	1.19881	2.26499	0.826439	0.772815	3.6645	3.34029	1.66384	6.8922	4.45148	3.80553	3.91167	2.6589	1.15455	1.35357
AAK1	0.486608	1.17779	1.02821	1.77699	4.99402	2.99794	14.1903	3.06357	6.64916	2.15613	5.08942	3.6051	4.85104	2.03646	6.05651	6.72334
AAMDC	2.12502	1.16645	0.492296	0.068523	0	0	0.11222	0.066969	0.269418	0.353864	0	0.15356	0	0	0	0
AAMP	2.89903	2.64835	9.47119	14.4666	9.82555	8.76294	38.9081	26.471	43.0407	39.9276	43.9794	39.8311	32.7727	21.3019	26.5695	26.7827
AANAT	0	0	0	0	0	0	0	0	0	0	0	0	0	0	0.015315	0.059579
AAR2	0.530676	0.588581	0	2.44396	0.599226	0.322608	2.98272	2.19845	0.560387	6.07143	2.30707	2.11264	3.95341	1.8359	0.474985	0.175537
AARD	0	0.104167	0	0	0.00875	0	0	0	0	0	0	0.014354	0	0	0	0.016161
AARS1	0	3.02354	2.88021	17.2081	25.5233	19.3507	78.6192	37.0997	62.7372	42.9043	85.5645	67.7422	57.3692	39.864	46.8409	55.8903
AARS2	0.342656	1.09165	1.59444	0.430329	0.109398	0.121359	1.8332	0.599073	0.443001	1.73102	1.0569	0.681276	3.48378	0.963626	0.184249	0.535094
AARSD1	0.228515	2.4758	3.5316	4.16883	0.582897	0.336439	4.62005	5.41449	2.77294	14.384	3.56221	3.82849	8.92724	4.4254	0.995859	1.23672
AASDH	0	0	0.590701	0.216361	0.299246	0.280235	1.63265	0.865621	1.07528	1.41778	1.93837	1.3617	1.10508	0.953721	0.601003	0.927391
AASDHPPT	0	0	3.81253	2.82468	0.826669	1.32559	3.9664	3.12851	2.77934	9.39849	2.57553	2.35436	2.54949	2.16229	0.764945	0.534034
AASS	0	0	0.805208	0.056571	0.099382	0.199887	0.471686	0	0.195521	0.105464	0.778312	0.460237	2.76657	0	0.18417	0.376187
AATF	2.73014	2.3895	3.79166	6.43007	3.11297	2.09308	5.92563	6.48565	10.1213	11.9085	8.41434	7.73664	11.0267	5.15692	8.16249	6.79642
AATK	0.246964	0.536056	0.220976	0	0.004565	0.002559	0.061018	0.022108	0.058428	0.0333	0.066169	0.0376	0.335185	0.007562	0.017422	0.134835
ABAT	0	0	0	0	0	0	0.186882	0	0	0	0	0	0	0	0.607586	0.6388
ABC7-42404400C24.1	0.3029	0.703933	0.105673	0.117006	0.431337	0.242421	0.201684	0.078324	0.615198	0.123572	1.16738	0.818817	0.658362	0.19716	0.618746	0.998787
ABCA1	0.023599	0.572754	0.847206	0.037366	0.005236	0.002934	0.128284	0.019721	0.064094	0.024302	0.032517	0.025872	0.627688	0.069381	0.078157	0.064663
ABCA10	5.79255	0	0	0	0	0	0	0	0	0	0	0	0.687248	0	0	0
ABCA12	0	0	0.048931	0	0	0	0	0	0.013085	0	0	0	0	0	0	0
ABCA13	0	2e-06	0	0	1e-06	0	0.013985	0.001688	0	0	1e-06	0	0.00978	0	0	2e-06
ABCA2	0.575763	0.663523	1.43681	0	0	0	0.129668	0	0	0.112297	0	0	0.20935	0	0	0
ABCA3	0.188711	0.53927	0.775362	0	0.002794	0	0	0.018041	0.023308	0.01111	0.028886	0	0.15685	0	0.039957	0.206439
ABCA4	0.084676	0	0.048688	0.034506	0	0	0.022321	0.004287	0.049608	0	0.005185	0.016508	0	0.012454	0.025098	0.050243
ABCA5	0	0.144379	0.141444	0.038111	0.026601	0.01508	0.12935	0.034036	0.100839	0.16311	0.402848	0.168008	1.59802	0.011037	0.095129	0.065687
ABCA6	0	0	0.212189	0	0	0	0.054538	0.028267	0	0.02155	0	0	0	0	0	0
ABCA7	3.56179	12.0782	9.3095	3.1946	3.88936	2.69711	15.3795	5.21573	7.31719	5.43163	12.3764	9.44095	21.6046	6.34483	8.12699	9.02642
ABCA8	0	0	0.24026	0	0	0	0.013736	0	0.015446	0	0	0	0.187052	0	0	0
ABCA9	0.04891	0.162091	0.072356	0	0	0	0.083813	0	0.053172	0	0.011979	0.009537	1.10815	0	0.01657	0.032185
ABCB1	0.326601	0.165313	0.433486	0	0	0	0	0	0	0.014247	0.04445	0.081076	0.283897	0	0.005124	0.026543
ABCB10	1.82194	1.86151	2.02029	47.9271	23.2306	21.2664	63.2371	66.4426	18.5714	91.2766	60.6569	56.6932	29.9953	57.8684	14.1633	14.7154
ABCB11	0	0	0	0	0	0	0	0	0	0	0	0	0	0	0	0
ABCB4	0	0	0	0.188364	0.008795	0.014762	0.382412	0.070971	0.029322	0.034936	0	0.021695	0.122764	0.072778	0	0
ABCB5	0	0	0.029	0.266359	0.163685	0.137449	0.247897	0.191119	0.162631	0.145337	0.505414	0.366742	0	0.149902	0.12943	0.11822
ABCB6	0.403917	1.57364	1.87318	26.3944	45.1649	30.4799	84.988	45.1041	50.3521	47.0169	67.4137	52.3062	28.9652	41.3544	46.1775	54.2402
ABCB7	0	0	1.01141	2.32664	1.24716	0.799982	2.92569	2.9258	1.11934	5.70602	4.04238	3.07788	1.74201	2.297	0.868652	0.926867
ABCB8	0.20363	0.86768	2.20384	0.75012	0.216733	0.093358	1.79193	0.743955	0.446698	1.40605	1.3271	1.05488	5.99887	0.553648	0.245004	0.726946
ABCB9	0	0.595018	0.413099	0.584582	1.16754	1.30154	3.15182	0.75237	4.5027	1.08523	3.66726	3.19891	3.142	0.560904	2.5204	3.2283
ABCC1	0.378213	1.68849	2.0138	0.22679	0.380495	0.13296	3.76393	0.722533	3.38616	1.22916	0.949794	0.750039	8.31541	0.397582	2.04327	2.5576
ABCC10	0	0	0	0.040881	0.053256	0	1.78228	0.686808	0.482991	0.574747	0.857629	0.605416	0.540472	0.26274	0.225234	0
ABCC11	0	0	0	0	0	0.015853	0.209982	0.010155	0.023075	0	0.013003	0.020709	0	0	0.033767	0
ABCC12	0	0	0	0	0	0	0	0	0	0	0	0	0	0	0	0.006686
ABCC2	0	0	0	0	0	0	0	0	0	0	0	0	0	0	0	0
ABCC3	0	0	0	0	0	0	0	0	0	0	0	0	0	0	0	0.083035
ABCC4	1.05863	0.052805	1.63526	6.51955	16.7741	13.3439	25.2722	14.732	20.5029	19.7387	40.5453	32.5499	25.2054	9.38711	18.3337	18.6117
ABCC5	0.154323	1.99743	1.96587	2.11147	1.48715	0.810354	18.8082	4.311	7.74166	6.84609	18.1424	9.00565	87.8625	6.57243	2.90019	2.3496
ABCC6	0	0.638217	0	0	0.010903	0	0.02424	0	0	0	0	0.017931	0	0.006014	0.010384	0.094138
ABCC8	0	0	0	0	0	0	0	0	0	0	0	0	0	0	0.018922	0
ABCC9	1.91536	6.21061	1.63186	0.003222	0.14631	0.02479	0.119361	0.017005	0.207614	0.00838	0.16553	0.093943	0.250762	0.020936	0.190952	0.321575
ABCD1	1.06947	2.46807	1.09664	0.127404	0.057247	0.026193	1.00586	0.352763	0.468294	0.392626	0.364844	0.282305	1.58428	0.103335	0.148624	0.365808
ABCD2	0.119076	0	0	0	0	0	0	0	0	0	0	0	0	0	0	0
ABCD3	0.214466	0.63425	3.07367	1.89151	0.291812	0.182462	2.12148	2.07219	0.521599	4.308	1.13761	1.20348	2.52716	1.50118	0.27272	0.363107
ABCD4	0.107625	1.45901	1.9037	0.235526	0.594146	0.30096	1.592	0.57335	0.564412	0.824112	1.05776	0.866375	4.53036	0.45891	0.377216	0.682689
ABCE1	0.803192	0	0	0.666265	0.340042	0	1.7028	0.560197	0.996716	5.84223	1.2416	0.929507	0	0.145852	0	1.06221
ABCF1	2.40014	1.59959	3.87827	8.62125	12.9994	10.6492	29.7201	13.297	22.5962	22.575	27.5728	20.3678	35.0673	13.5065	18.8762	21.1439
ABCF2	0.87321	0.959679	2.46744	2.55098	0.708277	0.73699	4.20082	4.0736	2.60537	9.00326	3.4531	2.55516	5.31549	2.36745	1.42264	1.53404
ABCF2-H2BE1	1.26085	0.553957	0.851457	1.84833	0.992947	0.600512	4.19933	2.17023	2.22611	9.06844	2.98144	2.89516	4.3853	2.34739	1.00347	1.48849
ABCF3	1.31316	2.0602	3.50905	1.79185	2.07442	1.50193	5.24081	3.51756	9.27779	7.83547	6.628	6.06002	17.9891	3.66739	6.70636	8.92672
ABCG1	0	0	0	0	0	0	0	0	0	0	0	0	0	0	0	0
ABCG2	0	0	0.042949	7.72717	4.90825	4.94856	11.6974	12.9348	6.8879	16.9291	15.5351	13.8706	16.9386	9.5779	4.19522	4.91067
ABCG4	0.067313	1.43339	0	0	0.009988	0.00419	0.055484	0	0.033292	0	0.0309	0.016421	0.580456	0	0.008782	0.169937
ABCG5	0	0	0	0	0	0	0	0	0.011825	0	0	0	0.065846	0	0.050654	0.013128
ABCG8	0	0.764442	0	0	0	0	0	0	0	0	0	0.016648	0	0	0	0
ABHD1	0	0	0	0	0	0	0	0	0.072265	0	0	0	0	0	0	0.247262
ABHD10	0.94231	1.92713	1.28506	1.74262	0.219744	0.336391	1.494	1.93319	0.464538	3.65089	1.02841	0.509084	2.14969	1.14277	0.237697	0.188163
ABHD11	1.07574	0	0.608455	1.15609	0.115833	0	0.229054	0.620829	0.067715	1.25135	0.137065	0.066142	1.16378	0.760887	0.196643	0
ABHD12	0.225561	1.14604	3.24349	2.45579	0.359171	0.444013	3.13922	3.64165	1.89237	5.83502	2.65111	1.66152	3.31719	2.3555	0.398344	1.3771
ABHD12B	0	1.08631	0	0	0	0	0	0	0	0	0	0	0	0	0	0.021112
ABHD13	0.153897	0.742508	0.379768	1.27717	0.743741	0.639248	1.38902	1.47788	0.75475	2.64219	2.53664	2.23387	4.33119	1.03958	0.681972	0.513014
ABHD14A	0.435041	0	0	0.214404	0	0.027354	0.393088	0.545349	0	0.623695	0.135529	0	0	0.086725	0.139712	0
ABHD14A-ACY1	1.96466	0	0.215317	1.63328	0	0	1.00913	0.629252	0.230654	2.24784	0	0.15258	0.144088	0.597193	0	0.080042
ABHD14B	0	4.52945	5.15195	3.72251	0.124311	0.207027	2.6273	4.4838	2.72945	9.54459	2.23446	2.50438	3.65671	2.63043	0.112379	0
ABHD15	0.536205	0.765497	0.915034	0.016801	0.04392	0	0.524335	0.053161	0.027441	0.250651	0	0.045115	0.994702	0.099917	0.015676	0.142155
ABHD16A	1.0251	0	3.86318	6.11834	6.47658	5.78148	10.2012	6.29199	11.1213	7.01801	11.6842	10.304	12.1738	4.70753	7.5391	8.13
ABHD16B	0.278699	0	0.852562	0	0	0	0.22278	0.63231	0.874008	0	1.01895	0.643938	4.72507	0.390645	0.065571	0.324402
ABHD17A	1.70346	4.16526	13.0989	9.57788	8.49781	9.53006	29.1018	17.3334	25.0813	20.8435	36.6468	32.7716	43.5599	13.0894	14.9033	14.4727
ABHD17B	0	0.399843	2.8396	0.519936	0.678354	0.57911	3.58571	1.36767	1.18009	4.08143	3.65781	2.96308	2.71344	1.0068	0.553062	1.06138
ABHD17C	0.628194	0	0	0	0	0	0.231859	0	0.16072	0.754735	0	0	0	0	0	0.089608
ABHD18	0.248914	0	0.093742	0.064629	0.317871	0.245812	0.705841	0.293519	0.510497	0.452436	0.947583	0.855946	1.15337	0.441952	0.257506	0.279454
ABHD2	4.29372	0	4.51209	1.22578	0.671923	0.346905	9.64287	3.5377	0.693324	5.76434	1.77659	1.26505	0.789116	3.97849	0	0.110397
ABHD3	0.303338	0	1.20291	0.646476	0.687935	0.764339	2.06481	1.37863	4.62654	1.42493	8.80771	6.85259	7.7731	1.07264	4.36538	5.47531
ABHD4	1.05808	1.79764	2.87289	10.0969	26.3411	20.6393	50.1816	21.0661	27.6585	20.9041	48.0338	41.3947	30.9448	17.7995	27.7332	30.1521
ABHD5	0	0	0	0.116657	0.129687	0.220181	1.94966	0.350081	2.06649	0.433881	1.53483	1.05154	0.738218	0.33896	1.40516	0.677241
ABHD6	0	0	0.532814	0.089261	0.01666	0.006974	0.240017	0.040324	0.166312	0.214625	0.085575	0.068342	0.790145	0.027542	0.047489	0.092388
ABHD8	1.27147	4.34928	2.38812	1.17606	0.119742	0.183613	1.08241	1.69053	0.431309	1.81785	0.20464	0.343524	0.437614	1.05526	0.156285	0.847371
ABI1	1.11722	3.71381	2.95608	3.20211	3.33848	2.7912	7.1397	4.34846	4.73563	7.86727	9.0732	7.48677	14.307	3.88042	3.24949	3.64802
ABI2	0.442251	0.523447	1.76192	1.21022	0.429123	0.252031	2.72135	2.09597	0.982124	2.79567	3.23638	2.89289	6.86062	1.33807	0.419353	0.451453
ABI3	0.735295	0.675467	0.340061	0.336621	0.061044	0.081582	0.998382	0.137878	0.243295	0	0.324678	0.159916	0.505661	0.221771	0.399286	0.292731
ABI3BP	0	0	0.697364	0	0	0	0.143002	0.017664	0.030712	0.065269	0.48507	0.311761	0.673052	0	0	0
ABITRAM	0.508466	0.729462	0.633731	1.84274	0.758823	1.04477	3.16572	2.32619	2.79216	4.76317	4.46418	4.01432	6.8726	1.80872	1.65067	1.76044
ABL1	0.439159	0.377932	5.31224	0.790646	0.291961	0.274903	5.00945	2.01225	1.01309	3.45673	1.45826	1.47973	2.56255	1.7894	0.473587	0.708275
ABL2	0.138519	0.436087	1.12309	0.045297	0.005385	0	0.407263	0.076507	0.036658	0.150274	0.092007	0.058555	0.460195	0.041707	0.023316	0.098571
ABLIM1	0.21824	0.538161	1.35979	1.07896	1.77443	1.24642	4.51865	0.825767	1.65319	0.540665	1.60352	1.05047	5.05497	0.365602	1.5749	1.83977
ABLIM2	0	0	0	0	0	0	0	0	0	0	0	0	0	0	0	0.044935
ABLIM3	0.459433	0	0.59022	0	0	0.011437	0.04039	0	0.048881	0.018045	0.187484	0.152777	0.042268	0	0.087215	0.13449
ABO	0	0.492172	0	0	0	0	0	0	0	0	0	0.872611	0	0	0	0
ABR	0.254283	0.388082	4.16622	0.012674	0	0	0.258184	0.128152	0.013352	0.233246	0.012216	0.068162	1.30416	0.07771	0	0.036195
ABRA	0	0.368026	0	0	0	0	0	0.01149	0	0	0	0	0.016501	0	0.040621	0.052639
ABRACL	9.02855	6.49975	11.0397	4.23703	0.06891	0.056794	1.79812	2.99799	0.113191	7.47267	0.618847	0.501383	17.1432	2.37436	0.096694	0.062963
ABRAXAS1	0.206565	0.017909	0.527864	0.369014	0.020801	0.094749	0.98614	1.28221	0.18074	2.58027	0.477397	0.709526	2.99911	0.56896	0.013139	0.062801
ABRAXAS2	0.731341	0.864879	0.915348	3.46796	0.586278	0.800556	3.21626	4.32665	1.93062	9.22627	4.85496	4.51185	9.07507	2.63672	1.21239	1.38829
ABT1	0.378431	0.394877	2.2435	2.82531	2.53429	2.73406	5.59485	4.55962	5.41008	7.87608	5.85734	6.09703	7.47341	3.61163	4.88068	5.03977
ABTB1	2.34661	9.06294	10.2364	8.10749	20.5086	19.5894	45.0003	25.3206	37.8245	18.047	52.8878	47.6253	67.9244	19.6151	25.6327	27.4023
ABTB2	0.733936	1.02086	0.815878	0.035033	0.19848	0.096134	0.611151	0.061605	0.693747	0.128922	0.488718	0.533726	1.24422	0.068705	0.283647	0.430927
AC001226.8	0	0	0	0	0	0	0	0	0	0	0	0	0	0	0	0
AC003002.4	0	0	0	0	0	0	0.497592	0.40899	0.433317	0	0	0	0	0	0	0
AC003002.6	0	0	1.31704	0.306324	0	0	3.01075	0.11397	0.758852	0.507764	0.972269	1.09272	0.848313	1.07466	0.091046	0.238424
AC003006.7	0	1.70669	0	0	0	0	0	0	0	0	0	0	0	0	0	0
AC004067.6	0.147591	0	0.245353	0	0	0	0	0	0	0	0	0	0	0	0	0.018417
AC004076.7	3.55012	6.47228	0	0	0.322573	0	0	0	0	0	0	0	0.745028	0	0.663499	1.52761
AC004076.9	0	0	0.12624	0	0	0	0.166773	0.072029	0	0.173814	0.605134	0.071906	0.295252	0	0	0
AC005281.1	0.072903	0.30146	0	0	0.043521	0	0	0	0.01808	0	0	0	0	0	0	0
AC005787.5	0	0	0	0	0.314839	0.252851	0	0	1.01239	0	0	0	0	0	0.107642	1.27103
AC006486.14	0	0	0	0	1.94645	0	0	0	0	0	0	0	0	0	0	0
AC006486.9	2.19044	0	5.46805	13.6203	22.1314	19.2464	42.373	23.1118	23.6094	27.6401	28.6411	31.7643	12.398	18.1693	13.3419	15.4099
AC006538.4	0	0	0	3.14731	0	0.361516	5.89027	6.21618	1.25994	7.04965	3.58493	0.609278	1.27221	4.35184	0.280539	0
AC007040.11	0.922842	1.59204	0.758164	0	0.077139	0.003944	0.042536	0	0.03179	0.018396	0.009767	0.023941	0.074729	0	0.092726	0.218182
AC007326.13	1.47522	0	0.316817	0.283801	0	0.031648	0	0.251903	0.030747	0.162787	0	0	0.429085	0.047957	0	0
AC009412.8	0	0	0	0	0	0	0	1.20712	0	0	0	0	0	0	0	0
AC010646.3	2.03607	0	0	0	0	0	0	0	0	0	0	0	0	0.39035	0	0.644255
AC011513.3	0	0	0	0	0	0	0	0	0	0	0	0	0	0	0	0
AC011530.4	0	0	0	0	0	0	0.549703	0	0.638085	0	0.244768	0.207764	0	0.216176	0.180174	0
AC012488.3	0	2.01118	3.7706	6.62213	8.77521	10.0733	9.91705	11.9077	15.4764	15.5843	14.3785	13.1948	14.0452	8.47085	11.1712	12.5114
AC024592.12	0	0	0	0.348635	1.61417	1.11592	1.57236	0.754216	0.734198	1.0536	2.83173	1.05638	1.13143	0.238174	1.51173	1.67042
AC037459.4	0	0.965195	0	0	0	0	0.437331	0	0	0	0	0.045393	0.174149	0	0	0
AC068533.7	0	0	0	0	0.123575	0.028019	0	0.086457	0	0.41624	0	0.125112	0	0	0	0
AC069368.3	0.720564	1.83412	0	0.169505	0	0	0.079767	0	0	0	0	0.118668	0.408919	0.25406	0.051488	0
AC092442.3	0	0	0	0	0	0	0	0	0	0	0	0	0	0	0	0
AC092835.2	0	0	0	0	0	0	0	0	0	0	0.022917	0	0	0	0	0.123882
AC093323.3	0.935302	0.749986	0	1.10654	0.389917	0.28941	2.22199	1.26729	0.997785	1.58777	0.751975	0.485811	0.530367	0.942378	0.704769	0.660818
AC104534.3	1.27498	2.2135	0	1.30415	0.295685	0.085268	0.63976	0	0	1.07094	0	0	0.233375	0	0.149268	0
AC116366.7	0	0	0.619753	0.414558	0.247746	0.136802	1.33042	1.21579	0.813176	1.82657	1.23534	1.10176	0	0.643078	0.55796	0.707669
AC138647.1	0.754723	0	0	0	0	0	0	0	0	0	0	0	0	0	0.064937	0.169499
AC138969.4	0	20.767	8.58278	1.55101	27.1931	15.4855	47.1118	7.05255	49.3817	4.29341	48.2828	34.5297	203.194	10.7309	44.1513	53.8603
ACAA1	3.53013	8.20794	1.12297	0.89546	0.574256	0.266203	1.37974	1.08786	0.603533	1.60015	0.90746	0.710418	1.96343	0.98458	0.312061	0.111006
ACAA2	0.694466	1.6956	3.70145	7.30213	1.55924	1.53121	11.7646	14.6007	5.95414	26.4681	17.6186	16.1677	7.99489	9.14343	2.68377	2.57344
ACACA	0.546334	0.356099	1.4488	0.147195	0.027242	0.018145	0.843474	0.275565	0.324354	0.841804	0.498462	0.411643	1.16195	0.207551	0.059306	0.087467
ACACB	0.050128	0.233642	0.302381	0	0.003893	0	0.060688	0.025137	0.009747	0.030972	0	0	0.109066	0.009889	0	0.046872
ACAD10	0.622394	1.88807	2.55096	0.651984	0.288279	0.147002	1.62638	0.894112	0.693674	2.11569	1.18197	1.10064	4.22807	0.885453	0.541045	0.533484
ACAD11	0	1.92653	0.962784	0	0	0	0	0.058115	0.175963	0.145521	0.269159	0.25251	0.582846	0	0.219934	0
ACAD8	0	0.686829	3.17289	0.760526	0.092623	0.130331	1.12571	1.06184	0.567573	2.13232	0.666425	0.525559	6.7469	1.35197	0.213894	0.340489
ACAD9	0.638868	2.0934	3.97417	3.04309	0.941891	0.539557	3.19188	3.89266	3.40593	6.79146	5.00959	4.70725	10.3867	4.43882	1.58597	2.43953
ACADL	0	0.594566	0	0	0	0.006597	0	0	0.026219	0	0	0	0	0	0	0
ACADM	1.93888	1.61225	3.31185	4.67656	0.334822	0.336965	4.66663	5.72652	0.690952	11.5448	2.29617	1.5899	7.67643	3.9714	0.359496	0.309322
ACADS	0.894423	6.11982	6.34541	5.04077	0.918522	1.01355	5.46294	6.5156	4.43369	7.3832	6.3941	5.75117	6.14067	4.00489	2.56342	2.96219
ACADSB	0.489016	0	0.891395	0.387169	0.212813	0.099922	1.05743	0.386231	0.388221	1.34081	0.73374	0.413514	1.1612	0.285445	0.359111	0.122603
ACADVL	4.70789	41.1515	40.8296	21.492	8.09253	7.87169	53.1786	29.0545	28.7337	36.7126	48.9195	40.4702	99.9546	20.6371	16.9534	23.4213
ACAN	0.020642	0.089602	0.440572	0.009342	0.004072	0	0	0	0.006796	0	0.004214	0	0	0.003372	0.008739	0.101826
ACAP1	1.84557	14.7045	24.3567	0.869744	0.023675	0.06609	4.41195	2.86526	0.105063	6.04315	1.18423	1.26934	14.7693	1.14821	0.101253	0.102068
ACAP2	0.236477	0.248808	1.82758	1.7411	3.5776	3.11468	7.35356	3.21042	7.07641	3.71212	9.81891	7.67328	7.5129	2.43902	5.89975	6.1141
ACAP3	0.292609	24.5761	15.6428	0.875795	1.06158	0.67135	6.55802	1.23314	2.47761	1.24139	1.76455	1.75049	21.553	1.60608	2.14003	2.86577
ACAT1	0	2.3709	3.4706	15.3548	4.4191	4.43178	8.17171	11.1932	10.9111	24.8964	14.0745	12.0719	19.2336	10.7486	9.82503	8.82174
ACAT2	1.35407	2.00881	6.5015	7.97306	1.12398	0.989419	11.4057	8.28971	9.04082	23.1686	19.8558	19.3119	32.665	7.28829	1.68707	1.36054
ACBD3	0.880992	0.085073	4.22555	1.41291	2.80228	2.45343	6.50939	4.16075	5.25627	6.50617	8.31914	7.26432	6.93239	2.61418	4.30592	4.62046
ACBD4	0	0	0.245148	0.134642	0.253332	0.173454	0.646546	0.422485	0.439121	0	0.516386	0.229205	0.240688	0.434416	0.199171	0.109615
ACBD5	0.051988	0	0.116251	0	0.025217	0.04353	0.483831	0.043271	0.140846	0.122847	0.173571	0.157	0.258715	0.093535	0.068843	0.04164
ACBD6	0.419402	0.175169	1.19754	1.77844	0.174798	0.248647	1.80952	2.15385	1.49702	4.39508	2.51443	1.82673	3.20293	1.41622	0.537741	0.710547
ACBD7	0	0	0.306826	0.008731	0.017118	0.014355	0.025343	0.027626	0.028766	0.067951	0.035276	0.02813	0	0.02832	0.040726	0.010552
ACCS	0	0	0.511587	0	0	0	0.128195	0	0	0.231419	0	0	0.776794	0	0	0
ACCSL	0	0	0	0	0	0	0	0	0	0	0	0	0	0	0	0
ACD	1.14146	0	2.06459	2.2915	0.113942	0.045995	4.65188	2.61924	2.22109	5.53367	0.920974	0.675493	6.08424	2.67316	0.600926	0.472445
ACE	0	0	0.089844	0	0	0.003166	0.067083	0	0.116495	0.037459	0	0	0.245838	0.024966	0.005389	0.099307
ACE2	0	0	0	0	0	0	0	0	0.012411	0.014785	0	0	0	0.012329	0	0
ACER1	0.356405	2.16342	0	0	0	0	0.033656	0	0	0	0	0	0	0	0	0.449821
ACER2	0	0	0.117846	0.205479	0.056529	0.053285	0.736781	0.376293	0.317623	0.420431	0.319857	0.533733	0.687835	0.222028	0.080628	0.274245
ACER3	0	0	0	0.141245	0	0.034192	0.993411	0.497358	0.298386	0.943878	0	0.21357	3.75138	0.418035	0.070313	0.197644
ACHE	0	0	0	13.6183	13.3284	9.78026	41.9434	20.2787	22.2982	22.0925	57.2947	46.979	75.9199	29.7651	16.7375	22.005
ACIN1	3.96421	9.92135	9.07093	3.99883	8.52197	5.82699	29.0959	8.24497	14.0971	14.69	20.1677	12.7783	82.858	9.52331	13.5569	17.0467
ACKR1	0	0	0	3.59269	1.17515	0.569355	3.06034	3.62829	0.807071	5.93196	3.03188	2.39038	0.833365	5.33157	0.466348	0.799655
ACKR2	0.131272	1.44895	0	0.228884	0.039016	0.016351	0.144323	0.157409	0.043315	0.219315	0.040165	0.010681	0	0.139824	0.037112	0.084152
ACKR3	0	0	0.896866	0	0.0398	0	0	0	0	0	0	0	0	0	0	0
ACKR4	0	1.10088	0.216998	0	0.06068	0.021769	0.038417	0	0.100943	0	0.035608	0.056886	0.461052	0	0.098818	0.080058
ACLY	2.14034	1.49516	10.617	6.07748	0.819048	0.577113	17.9999	10.3749	3.52498	25.1164	6.98752	6.11537	10.5874	7.09677	1.03782	1.6235
ACMSD	0	0	0	0	0	0	0	0	0	0	0.03657	0	0	0	0	0
ACO1	0.213575	0.484239	3.69827	1.41472	0.126804	0.141816	2.5117	2.16585	0.493014	4.35299	1.2745	1.0682	2.61489	1.46869	0.181056	0.371366
ACO2	0.688495	1.57627	2.01991	10.3403	6.24219	3.79965	14.6954	12.9916	14.7415	22.6559	26.2934	21.0547	27.2071	13.0608	12.9249	13.7428
ACOD1	0.18964	0	0	0	0.009421	0	0	0	0	0	0	0	0	0	0	0
ACOT1	0.084533	3.79768	0.89374	0.830997	0.117229	0.082572	0	0.430591	0	0.914987	0.354615	0.021715	0	0.299656	0.283987	0.164763
ACOT11	0.126916	0	0.471486	0.048095	0.014731	0	0.259532	0.233305	0.01185	0	0	0.144623	0.725924	0.103972	0.044847	0.034736
ACOT12	0	0	0	0	0.009737	0	0	0.015711	0	0	0	0	0	0	0	0
ACOT13	0.378022	0.036657	0.459233	0.657559	0.833764	0.607891	3.45577	1.04044	2.10021	1.59543	2.86575	2.14783	4.62616	0.856467	1.29894	1.47446
ACOT2	0.221481	0	0.548834	1.7054	0.034586	0.089378	0.839987	1.90206	0.207618	3.67175	0.345177	0.601655	1.15694	1.24253	0	0.655772
ACOT4	0	1.51501	0	0.04533	0	0	0.065254	0.190868	0.098122	0	0.060337	0	0.237366	0	0.062996	0.0545
ACOT6	0	0	0	0	0	0	0	0	0	0	0	0.047696	0	0	0	0.215471
ACOT7	3.1212	1.59626	8.39683	6.98068	0.140388	0.108116	7.08424	7.92578	0.594798	19.3385	0.641343	0.764721	5.03681	6.51061	0.24349	0.229835
ACOT8	0.066365	0.234748	3.59793	8.1459	1.85787	1.31542	7.88355	9.2312	4.29517	12.3413	8.76291	8.02343	7.89127	6.10132	1.27861	1.89208
ACOT9	0.088096	0.867824	0.6881	0.029494	0	0.011115	0.418535	0.128928	0.0777	0.52553	0.026107	0.043453	0.824018	0.22433	0	0.035779
ACOX1	0.262903	0.943625	1.17731	0.94079	0.463881	0.319457	4.1965	3.47067	1.74609	5.29214	3.83566	2.57053	14.2382	2.22436	0.653554	0.798537
ACOX2	0	0	0.24266	0	0	0	0	0	0	0	0	0	0	0	0	0
ACOX3	0.548728	0	2.05925	1.0299	0.142745	0.159498	1.5135	1.82092	0.708388	2.5214	1.6259	1.26345	2.6395	1.24591	0.296359	0.477474
ACOXL	0.193975	0.872237	0.170269	0.410487	0.640187	0.733678	1.89252	0.946644	2.24848	0.66263	2.06622	1.35585	1.02644	0.862994	1.17784	2.00077
ACP1	1.44704	3.55457	5.72388	29.9417	9.11207	7.64541	15.4846	24.9676	17.3982	47.1936	28.5848	25.5062	37.1734	23.6318	14.2626	14.7776
ACP2	1.61092	0.57113	2.72595	2.38241	1.03697	0.634871	5.45627	3.90542	3.44017	5.43054	5.2277	4.81457	18.2932	3.65071	3.56573	3.1916
ACP3	0	0	0	0	0	0	0	0	0	0	0	0	0	0	0	0
ACP4	0	0	0	0.025268	0	0	0	0	0	0.032528	0	0	0.188526	0	0	0.121403
ACP5	0	0.625857	0	8.72818	34.4866	35.8247	57.7766	30.2141	20.1441	21.3355	35.5905	32.1638	51.5292	23.8203	18.0361	16.4897
ACP6	0	0	0	0.016881	0	0	0	0	0	0	0	0	0.05081	0	0	0
ACP7	0	0	0	0	0	0	0	0	0	0	0	0	0	0	0	0
ACR	0.254143	0	0	0	0	0	0.033599	0	0	0	0	0	0.139638	0	0.021626	0
ACRBP	0	0	0.924079	0.132485	0.144181	0.105367	0.646316	0.052342	1.26733	0.063223	0.884735	0.672143	4.62959	0.156047	1.13156	1.74056
ACRV1	0	0	0	0.097513	0.042451	0.008873	0.187866	0.017123	0.105827	0.126048	0.086997	0.034784	0.073424	0.192867	0.06042	0.117522
ACSBG1	0.261243	0.401076	0.383217	0.504012	0.102057	0.067203	1.28851	0.814273	0.567131	2.05334	1.32745	0.717965	2.27557	0.756388	0.253293	0.328314
ACSBG2	0	0	0	0	0	0	0	0	0	0	0	0	0	0	0	0
ACSF2	0	0	0	0	0	0	0.465903	0.174903	0	0.31508	0	0	0	0.088647	0	0
ACSF3	0	0	1.42869	2.14859	1.17016	1.05742	4.59923	6.24031	3.08534	6.39008	5.00779	4.04667	1.57579	3.72027	3.08825	1.77231
ACSL1	0.709894	0.53255	1.35605	1.28958	3.32994	2.76092	3.27214	1.5925	6.80696	2.17337	15.2992	9.9759	8.71157	1.27228	4.38246	4.80385
ACSL3	0.37712	0.397393	2.44647	1.14208	0.444178	0.448496	4.87224	2.59734	3.15718	5.9155	9.84272	7.09839	4.02278	1.90774	1.37314	1.40599
ACSL4	0.559026	0.733455	4.61568	1.62528	0.387481	0.37494	7.92442	3.9628	2.1064	8.22618	3.67374	2.80955	9.9346	1.77654	0.290966	0.515925
ACSL5	0.359314	0.731919	0.708413	2.05066	0.34392	0.262343	2.99516	1.46789	1.14577	2.29471	2.6912	1.90964	4.25494	1.39295	0.646065	0.493426
ACSL6	0	0	0	3.50126	1.85057	1.88575	1.56646	2.17755	0.533396	2.16879	1.07319	0.64531	0.288897	2.63031	0.601328	0.275676
ACSM1	0	0	0	0.309886	0.271889	0.286027	0.675591	0.49642	0.575418	0.576913	0.918699	1.27033	3.47333	0.375145	0.304962	0.372118
ACSM2A	0	0	0	0	0	0	0	0	0	0	0	0	0	0	0	0
ACSM2B	0	0.7657	0	0	0.006637	0	0	0	0	0	0	0	0	0	0	0
ACSM3	0	2.05316	0.347084	0.09429	0.366503	0.297347	6.12453	0.884424	2.37711	2.11751	2.01347	1.55698	28.2767	0.397849	0.928224	0.993573
ACSM4	0	0	0	0	0	0.039516	0.167353	0.030483	0	0.01871	0	0	0	0	0.040361	0
ACSM5	0	1.04489	0	0	0	0	0	0	0	0	0	0	0	0	0	0
ACSM6	0	0	0	0	0	0	0	0	0	0	0	0	0	0	0	0
ACSS1	1.96809	1.19666	1.33499	9.39062	2.96234	1.79898	7.9164	7.32863	9.23805	11.3388	13.5899	9.98808	35.1947	6.37243	4.76112	4.75465
ACSS2	0	0	0	0	0	0	0.714213	0.084431	0	0.116499	0	0	0.105667	0	0	0
ACSS3	0	5.93239	0.94799	0	0	0	0	0	0	0	0	0	0	0	0	0
ACTA1	0	0	2.35197	0	0.080952	0.030111	0.119558	0	0	0	0.036933	0	0.124741	0.029734	0.064072	0.21595
ACTA2	0.218314	0	33.4236	0.903039	0.619687	0.600414	4.11011	1.55864	3.69487	3.44311	4.76872	4.17907	12.6262	0.610302	2.39278	2.56598
ACTB	44.459	58.5626	111.685	181.917	53.045	46.4525	252.863	246.067	149.392	409.016	260.344	249.68	88.7016	168.387	64.6944	70.8762
ACTBL2	0	0	0	0	0	0	0	0	0.011666	0	0	0	0	0	0.009995	0.051808
ACTC1	0	0.187592	84.0511	0	0.031786	0	0	0	0.052689	0	0	0	0	0	0	0.11707
ACTG1	48.0378	68.5322	172.19	7.16197	0.424004	0.789916	23.0276	16.8669	17.8891	35.0997	25.1328	29.8907	23.0043	8.03218	1.35013	2.17471
ACTG2	0	0	0.301871	0	0	0	0.034092	0	0	0	0	0	0.247917	0	0	0
ACTL10	0	1.16871	0.375173	0.165007	0.067314	0.03371	0.326998	0.36921	0.201087	0.053216	0.302515	0.06608	0.494766	0.266682	0	0.173722
ACTL6A	0.599664	2.45546	5.75538	9.39641	0.960279	1.19749	7.17037	10.294	3.05606	19.1543	5.82907	4.91521	20.4126	7.56823	1.42575	1.45161
ACTL6B	0.517828	0	0	0	0	0	0	0	0.070157	0	0	0	0	0	0	0.129884
ACTL7A	0	0	0	0	0	0	0	0	0.048025	0	0	0	0	0	0	0.053348
ACTL7B	0.678616	0.431255	0	0.023991	0.093923	0	0	0	0	0	0	0	0.286765	0	0.155491	0.374794
ACTL8	0.301516	0	0	0	0.022508	0	0.02489	0	0	0	0	0	0	0	0	0.145353
ACTL9	0.628056	0.864761	0	0	0	0	0	0	0.07806	0	0	0	0	0	0	0.144533
ACTN1	3.40113	1.2887	19.7724	0.019947	0	0	1.18402	0.020698	0.055297	0.366269	0	0.02363	0.505167	0.176973	0	0
ACTN2	0	3.16762	0	0	0	0	0	0	0	0	0	0	0	0	0	0.305513
ACTN3	0	0.350234	0.436652	0	0	0.005269	0.027905	0	0	0	0	0	0.17501	0	0.035878	0.185943
ACTN4	4.24509	5.87086	20.5632	16.9041	4.78571	3.75829	51.6411	36.5595	20.1538	68.8543	29.2917	24.8749	52.4633	29.9555	6.95761	8.62127
ACTR10	0	1.18233	1.79881	3.81671	3.73618	2.89568	6.40079	5.76832	3.79008	6.86644	8.07252	9.33023	6.96787	4.16968	2.77374	2.50771
ACTR1A	2.72748	3.9017	10.2859	22.2578	9.54043	8.6813	31.6074	29.2931	17.8054	49.0222	34.3597	29.9009	26.9798	24.667	10.3463	10.763
ACTR1B	1.81036	2.24849	3.99291	0.265973	0.179991	0.206588	2.49502	0.973423	1.37858	1.60185	2.00738	1.70767	4.84613	0.685974	0.776184	0.644266
ACTR2	7.99119	7.88807	17.2998	11.9492	1.5761	1.67706	16.9589	19.0645	5.33449	36.8835	13.1971	10.8909	17.9542	10.3303	1.91997	2.13625
ACTR3	1.51923	0	3.87821	5.40775	4.99499	3.2622	15.3045	12.3422	5.68199	19.6124	16.874	13.6484	4.90571	7.47103	3.19839	2.71393
ACTR3B	0	1.98683	0.775125	0.111084	0	0.022765	0.304259	0.343236	0.210987	1.24324	0.126879	0.049133	0.290601	0.366663	0.147711	0.096711
ACTR3C	0.033011	0.195337	0.054288	0	0.00326	0	0.029011	0	0.005508	0	0.007068	0	0	0	0	0.042246
ACTR5	0	0.401149	0.691047	0.202108	1.91067	1.52218	3.23777	0.827203	5.54533	1.61684	3.529	2.9322	5.30516	0.732004	4.63978	4.87953
ACTR6	0	0	2.07969	0.920872	0.112828	0.176246	1.85671	0.927927	1.09854	3.39548	1.54706	2.16508	1.36758	1.01179	0.199994	0.102155
ACTR8	0.072026	0	1.66114	0.525522	0.28867	0.222259	1.92641	0.977558	0.846356	1.82532	0.645791	0.521395	0.878615	0.653046	0.407271	0.42
ACTRT1	0.654114	0.712692	0	0	0	0	0	0	0.025008	0	0	0	0	0	0	0.138903
ACTRT2	0	2.68382	0	0	0	0	0	0	0	0	0	0.024755	0	0	0	0.111595
ACTRT3	0	0	0	0.23195	0.176652	0.084295	0.529704	0.081426	0.146648	0.3493	0.051601	0.123927	0.435255	0.187508	0.053813	0.162879
ACVR1	0.27399	0	0	0	0	0	0.688338	0.507537	0.556728	0.19228	0.789177	0.239595	0.475987	0	0.026439	0
ACVR1B	0.140012	0.74551	1.33714	0.107974	0.373664	0.21258	3.04613	0.402057	1.79971	0.849497	2.1513	1.55696	1.77789	0.247389	0.593216	0.791365
ACVR1C	0.013933	0	0.017156	0.006305	0.004123	0	0.064266	0.019966	0.013762	0.0123	0.051191	0.027158	0.28391	0	0	0.019091
ACVR2A	0	0.548274	0.511547	0.005547	0.010888	0.003034	0.056509	0.005832	0.048885	0.0731	0.067178	0.029791	0.155212	0.017946	0.005255	0.047322
ACVR2B	0.005197	0.23996	0.562727	0.056411	0.061483	0.032306	0.630015	0.248116	0.087242	0.331568	0.397462	0.205084	0.890458	0.201136	0.048392	0.048408
ACVRL1	0	0	1.74157	0	0.061295	0	0.522961	0	0	0.236067	0	0	0	0	0	0.221539
ACY1	0.574129	2.1988	2.81447	1.75445	0	0.064673	1.5608	1.91711	0.879511	5.76361	0.873958	1.0507	3.00251	0.412832	0.264241	0
ACY3	0.321038	0.883995	0.268667	0	0	0	0	0	0	0	0	0	0	0.052954	0	0.118231
ACYP1	0	0.52374	0.477599	0.574718	0.509874	0.364299	1.84848	1.15024	1.34033	3.05592	2.44336	1.04452	11.4593	0.780918	0.477099	0.49703
ACYP2	0	0	0.560541	0.139139	0.566878	0.604012	2.30052	0	0.776853	1.31416	2.61925	0.616911	1.90047	0.56514	0	0
ADA	4.51636	13.0424	9.40895	0.883643	0.014417	0.036078	1.64864	0.674435	0.275564	3.04726	0.614694	0.400778	2.66175	0.428257	0	0.132829
ADA2	0.535908	0.231171	0.516375	0	0	0	0.327317	0	0.018725	0.021339	0	0	0.061832	0.017323	0.037122	0.069137
ADAD1	0	0	0	0	0	0	0	0	0	0	0	0	0	0	0	0
ADAD2	0	0	0	0	0	0	0	0	0.087677	0	0.03608	0.014411	0.040622	0	0.100136	0.062325
ADAL	0	0.317709	0.344019	0.907096	0.106196	0.089123	0.934391	1.03552	0.169651	1.94135	0.438321	0.327451	1.02938	0.959341	0.075854	0.204686
ADAM10	0.467004	1.33346	1.88524	0.522247	0.550217	0.428129	1.72955	0.764982	1.17663	1.24812	1.64927	1.20508	3.47038	0.477103	0.847859	0.869164
ADAM11	0	0.260032	0.429648	0	0	0.027348	0.144879	0	0.02716	0	0.08408	0.060288	0	0	0.029096	0.188416
ADAM12	0.148117	0.304524	2.50948	0	0.013845	0.013573	0.051372	0	0.015402	0.004588	0.01432	0.003799	0.080764	0	0.013202	0.01282
ADAM15	2.45226	3.5315	5.09369	1.07684	0.620362	0.423204	1.82676	1.34843	2.15637	2.74867	2.22051	1.87611	2.25067	0.873778	0.934724	1.00596
ADAM17	0.448716	0.513797	2.97979	2.08507	3.4686	2.46565	8.97373	4.22685	10.5529	7.112	11.9949	9.14083	18.1914	3.89784	8.2479	9.71992
ADAM18	0	0	0	0	0	0	0	0	0	0	0	0	0	0	0	0
ADAM19	0.300383	0.931512	4.34617	0	0	0	0.049593	0	0.074507	0	0	0	1.10404	0	0	0.055687
ADAM2	0	0	0	0	0	0	0	0	0	0	0	0	0	0	0	0
ADAM20	0	0	0	0	0.021106	0.005895	0	0.011353	0.128838	0.013953	0.159235	0.092419	0.358735	0	0.030104	0.221057
ADAM21	0	0.779382	0	0	0	0	0.027166	0.009874	0.010191	0	0.063011	0.040208	0	0	0.017463	0.056564
ADAM22	0	0	0.059567	0.029853	0.001952	0.001641	0.054298	0	0.026065	0.003883	0.02424	0.041793	0.118493	0.009699	0.016758	0.025311
ADAM23	0	0.139916	0.510086	0	0	0	0	0.004709	0	0	0	0.014407	0.054417	0	0	0.059423
ADAM28	0.132813	1.13187	0.471343	0.01257	0.013108	0	0.046682	0.004232	0	0.005212	0.005421	0	0.415787	0.013023	0.011248	0.024273
ADAM29	0	0	0	0	0	0	0	0	0.07938	0	0	0	0	0	0	0
ADAM30	0	0	0	0	0	0	0.057877	0	0.021713	0	0	0	0	0	0.009302	0
ADAM32	0	0	0	0	0	0	0	0	0	0	0	0	0	0	0	0
ADAM33	0	1.07691	0.246335	0	0.063614	0.056669	0	0	0	0	0	0	0	0	0	0
ADAM7	0	0	0	0	0.046225	0	0	0	0	0	0	0	0	0	0	0
ADAM8	0.402897	1.80566	3.16926	0.318216	0.396978	0.169029	3.83638	0.498279	1.56435	0.562619	1.18985	0.734953	5.34081	0.75765	1.37008	1.56195
ADAM9	0	0	3.05078	0.319357	0.117487	0	2.25041	0.782776	0.456462	1.62467	1.59364	1.30603	3.1963	0.811745	0	0
ADAMDEC1	0	0	0	0	0.01702	0	0	0	0.072097	0	0.020294	0	0	0	0	0
ADAMTS1	0	0	2.02456	0	0	0	0	0	0	0	0	0	0	0	0	0
ADAMTS10	0.374639	1.15702	1.92628	0.020395	0.033831	0	0	0	0.05926	0	0	0	0.640925	0.036772	0	0.262015
ADAMTS12	0	0	0.969653	0	0.00253	0.003582	0.023728	0	0.003557	0	0	0.00351	0	0	0.003049	0.007895
ADAMTS13	0.230334	0.272564	0.658798	0.011605	0	0.006369	0.160276	0.006122	0	0.015073	0.007834	0.062402	0.079491	0.018837	0.005421	0.081615
ADAMTS14	0.124232	0.187122	1.03094	0	0.003346	0	0.074443	0	0.022325	0.019951	0	0	0	0	0.009567	0.024779
ADAMTS15	0.093714	0.505275	0.505042	0	0.015422	0	0	0	0	0	0	0	0.028757	0	0.01323	0.125631
ADAMTS16	0	0	0	0	0	0	0	0	0	0	0	0	0	0	0	0.040654
ADAMTS17	0.039437	0.291732	0	0	0	0	0	0.004713	0	0	0.042256	0	0.115732	0	0.004175	0.046013
ADAMTS18	0	0	0	0	0	0	0	0	0	0	0	0	0	0	0	0
ADAMTS19	0	0	0.039836	0	0.010764	0	0	0	0.01795	0	0	0	0	0	0.041025	0.05977
ADAMTS2	0.100915	0.054294	2.21616	0	0.005433	0	0	0	0.004532	0	0	0.008944	0	0.017993	0	0.120724
ADAMTS20	0	0	0.258069	0	0	0	0	0	0	0	0	0	0	0	0.004155	0.043047
ADAMTS3	0	0.059173	0.172593	0.117775	0.059233	0.039803	0.836972	0.277257	0.014822	0.665238	0.08571	0.073117	0.911353	0.191241	0	0
ADAMTS4	0.885415	1.8053	0.426962	0	0.073651	0.007822	0.06632	0.02103	0.180505	0.003702	0.123269	0.073565	0.199901	0.018493	0.14211	0.372369
ADAMTS5	0.121513	0.317991	1.34896	0	0.005677	0	0	0	0.012633	0	0	0	0.013254	0	0.002707	0.031545
ADAMTS6	0.067923	0	0.153433	0	0	0	0.02426	0	0	0	0	0	0	0.024974	0	0.021176
ADAMTS7	0.489046	1.93917	2.23528	0	0	0	0.127443	0.010882	0.039344	0.006697	0	0	0.259099	0	0.013462	0.168433
ADAMTS8	0.088726	0.650739	0	0	0	0	0	0	0.008778	0	0	0	0	0	0	0.1559
ADAMTS9	0	0.048104	0.206933	0	0.007218	0	0	0	0	0	0	0	0	0	0	0.040197
ADAMTSL1	0.065912	0	3.9095	0	0	0	0	0	0	0	0	0	0	0	0	0.038754
ADAMTSL2	0	0	0.258686	0.007126	0.004658	0	0	0	0.007764	0	0	0	0	0	0	0.094793
ADAMTSL3	0.117642	0.064267	0.01487	0	0.010718	0	0	0	0.031294	0	0	0.008822	0	0	0	0.02977
ADAMTSL4	0	0	0.069467	0.06416	0.870972	0.478676	9.64636	1.6493	8.25631	2.45226	27.6865	20.3586	29.8544	0.567819	2.2244	2.92381
ADAMTSL5	0	0	0.081501	0.011218	0.014659	0.00614	0.097544	0.011828	0.036602	0.029069	0	0	0.101887	0	0	0
ADAP1	1.31937	5.96971	6.59865	0	0	0.071209	0.772886	0.091382	0.367931	0.112195	0.541675	0.116939	2.96508	0.379657	0.453042	0.832764
ADAP2	3.76925	0	0	0	0	0	0	0	0	0	0.109281	0	0	0	0	0.322315
ADAR	0.137601	0	4.13615	2.5645	4.52729	3.8708	27.2993	8.11996	14.6439	13.2347	34.7134	27.0408	29.6842	5.6792	10.6818	11.5582
ADARB1	0.495546	1.42108	0.724385	0.02633	0.066696	0.030251	0.660147	0.222876	0.628524	0.123968	1.20319	1.06279	0.778455	0.209485	0.273042	0.479184
ADARB2	0	0.28465	0	0	0	0	0.009603	0	0	0	0	0	0.015099	0	0.009255	0.045978
ADAT1	0.185021	0.759961	0.95753	1.20833	0.92863	0.66089	2.68926	1.57149	1.54076	1.70046	2.90354	2.35389	4.07749	1.32868	1.04415	1.24235
ADAT2	0.205992	0.897686	1.13102	0.241727	0.036046	0.023293	0.567727	0.250628	0.268303	0.810298	0.28665	0.251027	1.5259	0.257106	0.071371	0.143755
ADAT3	1.33368	5.45941	2.11264	1.20226	0.691642	0.366382	5.25778	1.35181	2.07515	1.55113	1.84794	1.00114	10.2675	0.790463	1.24744	1.56932
ADCK1	0	1.64725	1.80313	1.16404	0.392212	0.275945	0.861751	0.606688	1.21185	1.44778	0.910449	0.858078	2.81395	0.95183	1.0353	0.688424
ADCK2	0.773902	0	0.311005	0.481721	0.053732	0.109296	0.895904	0.495466	0.34507	0.593538	1.2942	1.008	0.622134	0.41884	0.142277	0.324044
ADCK5	1.01689	3.35596	6.14446	0.5287	0.177858	0.201206	2.22641	0.503476	2.62501	1.18056	2.07643	1.50411	12.19	0.362992	0.62547	0.689493
ADCY1	0	0	0.207635	0	0	0	0	0	0	0	0	0	0	0	0	0.022911
ADCY10	0	0.181088	0.029046	0.026678	0.286076	0.194694	0.160778	0.04504	0.105979	0.027727	0.093682	0.02501	0.609418	0.034647	0.274224	0.415142
ADCY2	0.04686	0	0	0	0	0	0	0	0	0	0	0.004568	0	0	0	0.015422
ADCY3	0.282759	0.738836	1.51759	0.070622	0.029506	0.003835	0.678116	0.279777	0.120669	0.829382	0.100386	0.047427	0.516584	0.080192	0.042274	0.05528
ADCY4	0	0	0	0	0	0	0.137401	0	0.01874	0	0	0.009243	0.104497	0	0	0
ADCY5	0.16875	0.133157	0.107852	0.029723	0.019434	0.009329	0.037072	0	0.060212	0.006054	0.045921	0.027419	0.077685	0.009483	0.036585	0.138794
ADCY6	0.943864	1.99411	2.24944	0	0.015195	0	0.027048	0	0.030416	0.036243	0.006281	0	0	0.019174	0.01738	0.165913
ADCY7	0	0	0	0	0	0.056705	2.26037	0.121939	1.43277	0.539043	0.979448	0.780413	0	0	0	0.500813
ADCY8	0.043112	0.306063	0.023666	0	0	0	0	0	0	0.008466	0	0	0	0	0.024356	0.015773
ADCY9	1.20927	0	0.116362	0	0	0	0	0	0	0	0	0	0.365067	0	0	0.150463
ADCYAP1	0.401139	0.329885	0.378156	0	0	0	0	0	0	0.035233	0	0	0	0	0.025339	0.010943
ADCYAP1R1	0.365854	0.088827	0.092502	0	0.002778	0	0	0	0.004635	0	0	0	0.012956	0	0.011917	0.0823
ADD1	2.04939	3.6075	9.16766	27.1405	10.2516	8.19191	42.5885	37.0961	19.546	50.8047	39.2262	33.0477	52.8219	32.9514	12.5412	13.5515
ADD2	0.218777	0.517991	0.168689	12.0196	0.666048	0.498094	9.16842	11.592	0.516986	18.6598	3.25135	2.97923	7.79685	12.0695	0.662308	0.738121
ADD3	0.523276	0.618874	3.85655	1.01373	0.920458	0.72998	11.0941	4.98828	1.28383	6.52744	6.93268	5.7874	13.3058	3.49242	0.656764	0.758951
ADGB	0	0	0	0	0	0	0	0	0	0	0	0	0	0	0	0
ADGRA1	0	0	0.147584	0	0.008859	0	0	0	0	0	0	0	0	0	0	0.057369
ADGRA2	0	3.06582	2.98659	0	0	0	0	0	0.189834	0	0	0	0	0	0	0
ADGRA3	0	0.520725	2.85094	0.100537	0	0	0.171859	0.099441	0.006848	0.063521	0	0.020268	0	0.027195	0.017607	0.12162
ADGRB1	0	0	0	0	0	0	0	0	0	0	0	0	0	0	0	0
ADGRB2	0.293712	0.505634	1.17212	0	0	0	0	0	0	0	0	0	0	0	0.005485	0.033172
ADGRB3	0	0.145759	0	0	0	0	0	0	0	0.006043	0.006284	0	0	0	0	0.011256
ADGRD1	0.198235	0	0	0	0	0.03482	0.115297	0.022309	0.040229	0.068669	0.067247	0.063614	0.040249	0.00572	0.046381	0.138494
ADGRD2	0	0	0	0	0	0	0	0	0.089164	0	0.061265	0	0	0	0.016978	0.021996
ADGRE1	0	0	0.036834	0.111559	0	0	0.04412	0	0.011035	0	0	0.010884	0.076843	0.010961	0	0.036752
ADGRE2	0.428953	1.26042	0.248804	0.020749	0.005427	0.020515	0.314129	0.039415	0.1081	0.152255	0.039272	0.004485	0.448543	0.025844	0.0194	0.132354
ADGRE3	0	0.205836	0	0.015918	0	0	0.299055	0	0	0	0	0	0.167851	0	0	0
ADGRE5	1.27732	4.09012	4.94236	0.447336	0.099802	0.053755	2.15307	0.931811	0.178015	1.18223	0.760573	0.667054	3.17821	0.576528	0.142344	0.118581
ADGRF1	0	0	0	0	0.017137	0	0	0	0	0	0	0	0	0	0	0.031722
ADGRF2	0	0	0	0	0	0	0.014158	0	0	0	0	0	0.044393	0	0	0
ADGRF3	0	0	0.035235	0	0.038072	0.028404	0	0	0	0	0.122248	0.032526	0	0	0	0.164957
ADGRF4	0	0.978758	0	0	0	0	0.013997	0	0	0.012512	0	0	0	0	0	0.011659
ADGRF5	0	0.592082	0.017885	0	0	0	0	0	0	0	0	0	0	0	0	0.041754
ADGRG1	0	0	1.53476	0	0	0	0.25639	0	0	0.115709	0	0	0	0.097805	0	0
ADGRG2	0	0	0	0	0	0	0.017824	0.006469	0.006683	0.007962	0	0.006593	0.018659	0	0	0
ADGRG3	0.050828	0.420667	0	0	0.015122	0	0.463896	0.036605	0	0.029985	0.062196	0	0.805566	0.075016	0.032344	0.083835
ADGRG4	0.030947	0	0	0	0.007325	0	0	0	0	0	0	0	0	0	0	0.006784
ADGRG5	0.485778	0.4137	0.144298	0	0.017313	0	0.28194	0	0.009614	0	0	0	0.160802	0.028643	0	0.181433
ADGRG6	0	0	0.38513	0	0	0	0.005829	0	0	0.01562	0	0	0	0.008673	0	0.033946
ADGRG7	0	0	0	0	0	0	0	0	0	0	0	0	0	0	0	0
ADGRL1	0.93017	1.68894	1.69607	0.021411	0.025667	0.001961	0.287597	0.034435	0.08566	0.013919	0.046686	0.046101	0.326663	0.042505	0.016688	0.272237
ADGRL2	0.138134	0	0.558285	0	0	0.00625	0	0	0	0	0	0	0	0	0	0.020668
ADGRL3	0.035545	0.189387	0.244127	0	0.001314	0	0	0	0.002194	0	0	0	0	0	0.007522	0.01704
ADGRL4	0	0	0	0	0	0	0	0	0	0	0	0	0	0	0	0
ADGRV1	0	0	0	0	0.169243	0	0.362248	0	0.183364	0.10892	0.439742	0	0	0	0.078145	0.817238
ADH1A	0	0	0	0	0	0	0	0	0	0	0	0	0	0	0	0
ADH1B	0	0.260109	0	0	0.009318	0	0	0	0	0	0	0	0	0	0	0
ADH1C	0	0	0.208121	0	0	0	0	0	0	0	0.030444	0	0	0	0	0.082503
ADH4	0	0.335479	0	0	0	0	0	0	0	0	0	0	0	0	0	0
ADH5	1.08242	0.678739	7.31127	3.1438	0.069717	0.214306	2.46999	3.86739	3.06118	9.73913	3.51753	3.52481	6.63991	2.22771	0.850863	0.907044
ADH6	0	0	0	0	0	0	0	0	0	0	0	0	0	0	0	0
ADH7	0	0	0	0	0	0	0	0	0	0	0	0	0	0	0	0
ADHFE1	0	0.747515	0.5817	0.080296	0	0	0	0	0	0	0	0	0	0.064797	0	0.096779
ADI1	3.44652	3.9633	6.33283	3.8393	1.94319	1.51761	7.87027	4.49415	4.29342	10.0817	5.65969	5.00795	7.61135	3.181	2.37255	2.22137
ADIG	0	0	0	0	0	0	0	0	0	0	0	0	0	0	0	0
ADIPOQ	0.055129	0	0	0	0.02452	0.006861	0.009086	0	0.00678	0	0.008437	0	0	0	0.011678	0.026158
ADIPOR1	3.06144	2.54023	5.70109	106.744	228.333	209.836	219.004	160.589	171.128	147.599	252.502	230.76	130.484	135.064	162.461	147.173
ADIPOR2	0.62825	1.18161	3.13262	13.8212	11.5479	9.47674	53.0881	28.7431	36.6615	39.6704	57.1365	45.6558	45.8229	28.4992	24.5902	25.158
ADIRF	0	0	0	0	0	0	0	0	0	0	0	0	0	0	0	0
ADK	0.353754	4.10817	3.62766	2.6215	0.447868	0.31303	1.22225	2.03539	0.776457	5.55632	1.13375	1.36963	4.4341	1.36603	0.77097	0.609075
ADM	0	0.509492	2.80411	1.87786	0.232258	0.387834	2.79333	2.12326	1.82072	2.19386	2.45287	2.95652	7.71186	2.5351	0.806956	1.6654
ADM2	0.574751	1.25267	0.274076	0.075502	0.022433	0.022591	1.30638	0.601007	0.284193	0.418808	1.07397	0.641876	2.96395	0.334134	0.044864	0.398467
ADM5	0.285948	2.26764	0.44208	0.224414	0.305222	0.265142	1.94383	0.098484	0.567687	0.579514	0.449554	0.199895	2.1912	0.221771	0.798571	1.73387
ADNP	0.61535	0.947898	2.36157	3.24798	2.67364	2.04649	11.0527	7.59828	5.52562	9.33329	8.27453	6.79318	10.7815	6.32684	3.64417	3.96316
ADNP2	0.158791	0.621552	1.2762	4.7679	4.65553	4.21294	12.8507	5.8255	7.37136	9.71842	9.67638	8.05266	10.6574	5.1898	6.35905	7.69248
ADO	0.170776	0.78791	2.0131	0.47306	0.025343	0.02126	0.889649	0.703503	0.17738	2.00268	0.303127	0.291633	0.966024	0.629036	0.137524	0.150019
ADORA1	0.113281	0.501621	1.32906	0	0.033677	0.005645	0	0	0	0.026721	0	0	0	0	0	0
ADORA2A	0	0	0	0	0	0	0	0.473458	0	0	0.675291	0	0.506867	0	0	0
ADORA2B	1.74453	2.39357	0.35418	0.497533	0.072611	0.023557	2.83544	1.11674	0.304496	2.41212	0.403457	0.392532	2.40536	0.699018	0.020052	0.156108
ADORA3	0	0	0	0.273154	0	0	0.10513	0.019181	0	0.023518	0	0.019469	0	0	0	0
ADPGK	0.844241	2.22988	1.44703	1.17192	0.367383	0.491756	4.53738	2.09195	2.09046	3.40035	3.49961	3.22611	4.71166	1.82421	0.56886	0.873565
ADPRH	0.111619	0.534977	0.505409	0	0	0.003473	0.239159	0.033387	0.172443	0.106843	0.111033	0.190537	0.365893	0.013696	0.023646	0.199063
ADPRHL1	0.075631	0.507374	0.036207	0.011406	0.024242	0.00627	0.236712	0.00903	0.093332	0	0.073331	0.085989	0.239464	0.006177	0.032016	0.120892
ADPRM	0	0	1.63708	0.293173	0.212961	0.168503	0.601382	0.995401	0.99952	1.21093	0.816565	1.30481	0.900031	0.87548	0.546092	0.371894
ADPRS	2.91072	2.3253	4.31517	3.60812	6.24667	5.27993	13.2061	8.48746	24.8848	13.8437	22.8448	21.0979	19.8059	6.48828	18.7592	20.7236
ADRA1A	0	0	0	0	0	0	0	0	0	0	0	0	0	0	0	0
ADRA1B	0	0	0	0	0	0	0	0	0	0	0	0	0	0	0	0
ADRA1D	0	0.869051	0.073585	0.011374	0.052955	0	0.073451	0	0.110226	0	0	0.032617	0	0.021897	0.028332	0.232503
ADRA2A	0	0.820718	0.163353	0	0.009803	0.004112	0.043566	0	0.049014	0.019466	0	0.016117	0.239299	0.024333	0.042002	0.072542
ADRA2B	0.121764	1.02889	0	0	0.010327	0	0	0	0	0	0.03194	0	0.023998	0	0.014746	0.152814
ADRA2C	0	0	0.148143	0	0	0	0	0	0.044119	0	0	0	0	0	0	0.147014
ADRB1	0.945741	1.5252	0.266257	0	0.044714	0	0	0	0.106379	0	0	0.020986	0.059275	0	0.009115	0.389721
ADRB2	1.9726	0	0.367021	0.217472	0.060866	0.025452	0.134727	0.081839	0.219221	0.080344	0.124802	0.066515	0.444785	0.117332	0.129982	0.430699
ADRB3	0.179726	0.364273	0	0	0.022919	0	0	0	0.02265	0	0	0.025081	0	0	0.076248	0.155286
ADRM1	4.54488	9.8465	11.3788	35.3367	19.0839	18.2227	73.2999	52.0049	82.7317	83.676	91.9503	78.3117	82.9381	48.2543	68.0016	75.4238
ADSL	1.84329	2.4408	7.66386	7.49435	0.783292	0.914355	8.09167	11.2683	1.62238	26.1301	5.18746	5.94267	9.47474	5.9448	0.451792	1.00983
ADSS1	0	0	0.609996	0	1.14833	0.572445	0.378828	0.058887	0.885754	0.072192	0.427836	0.279575	0.167984	0.020092	0.82848	1.75746
ADSS2	1.71663	0.338257	4.38997	2.66558	0.580483	0.46975	3.65311	2.81015	2.12958	6.24021	3.70056	2.73629	5.12204	1.65086	0.877834	0.725281
ADTRP	0	0	0	0	0.012432	0	0	0	0.020643	0	0.025425	0	0	0	0	0
AEBP1	0.420693	0.811115	9.76832	0	0	0	0.051367	0.014921	0.007705	0.03672	0.019075	0	0.129007	0.091798	0	0.051315
AEBP2	0	0	5.45533	0.657196	0.141709	0.342957	5.55341	0.911269	1.14347	3.12152	2.44733	1.12265	1.50629	0.115036	0.681316	1.40294
AEN	0.106213	0.452214	3.24509	10.2884	49.8824	47.7739	73.35	23.8602	96.1083	38.808	78.7836	65.2436	51.2309	20.4163	80.2591	83.1094
AF011889.5	0	0.660988	0.207744	0.018257	0.107156	0.011602	1.07463	0.020009	0.203817	0.025957	0.283192	0.189124	1.69323	0	0.052175	0.279024
AFAP1	0	0.162293	2.57638	0.009918	0.002537	0	0.197656	0.204754	0.063497	0.302657	0.120682	0.070651	0.14795	0.117632	0.007257	0.004698
AFAP1L1	0.02076	0.171995	0.571727	0	0	0	0	0	0.010258	0	0	0	0	0	0	0.039849
AFAP1L2	0.22444	0.65356	0	0	0	0	0.011385	0	0.025618	0	0.021134	0	0	0	0	0.059902
AFDN	0.08725	0.234729	1.36655	0.007181	1.33043	0.88278	1.93919	0.234967	2.21403	0.119172	6.37317	4.17938	0.591648	0.125351	1.88735	2.09718
AFF1	0	0.515537	1.45886	1.64935	15.4474	9.96976	60.59	5.16065	9.68331	4.74936	16.5961	15.6681	11.3538	5.76823	7.09403	8.15566
AFF2	0	0	0.069179	0.002008	0	0	0.022031	0.010597	0.004384	0	0	0	0.024543	0.002175	0	0.007297
AFF3	0	0	0.087106	0	0.001847	0	0	0	0.006166	0	0	0.012169	0	0	0.007929	0.037638
AFF4	0.329151	0.038203	2.61144	0.601571	3.41753	2.39924	11.3314	2.06213	5.24824	3.28152	7.06956	5.32109	7.7531	1.58769	3.86538	4.49237
AFG1L	0.212368	0	0.041113	0.212956	0.025919	0.012435	0.177159	0.177212	0.012349	0.3026	0.091772	0.059023	0.224192	0.118575	0.02646	0
AFG3L2	2.55441	1.02329	4.88069	17.5703	6.62224	5.01806	43.6433	30.6192	24.5474	47.7172	32.0207	24.8459	35.4251	21.0181	12.8919	13.0709
AFM	0	0	0	0	0	0	0	0	0	0	0	0	0	0	0	0.056696
AFMID	0	1.29215	0.932234	0.861531	0.205847	0.09599	1.27385	0.851094	0.623381	1.98289	1.02254	0.638116	4.26331	0.729483	0.447687	0.615454
AFP	0	0	0	0	0	0	0	0	0	0	0	0	0	0	0	0
AFTPH	0.60515	1.5322	1.2525	4.63373	8.21442	7.19718	8.91475	7.01075	10.1587	8.35669	13.5724	12.1066	12.1427	4.90205	9.37381	9.04618
AGA	0.134213	0	2.64553	2.23699	0.447933	0.498225	1.65648	3.63123	0.656596	3.25149	2.96118	3.22955	9.73032	2.72819	0.965649	0.935529
AGAP1	0.172038	0.259781	0.562343	0.096209	0.036659	0.001665	0.344526	0.119836	0.03726	0.228557	0.27791	0.137391	0.004502	0.050591	0.007153	0.072142
AGAP2	0.758251	1.42194	0.633255	0.045287	0.114075	0.008708	0.556343	0.10043	0.080713	0.269133	0.049993	0.022752	0.209376	0.091563	0.103765	0.285173
AGAP3	0.410947	5.6595	7.4799	0.121042	0	0.006024	1.11835	0.119817	0.215435	0.55607	0.281026	0.118047	3.7727	0.214009	0.051269	0.079727
AGAP4	0.087416	1.37229	0.215934	1.01947	1.27968	0.895531	3.74159	0.553514	2.32492	0.902944	4.35617	2.78925	6.6802	1.05859	2.09554	2.03437
AGAP5	0	0	0.719623	0.199927	1.20166	0.313449	2.57831	0.121937	3.89941	0	3.44308	1.64593	8.31035	0.779201	2.80726	4.51818
AGAP6	0.70668	3.3323	2.87823	0.163071	2.42666	1.12403	8.59228	0.461799	6.16429	0.937225	8.42714	5.2196	31.3958	1.05671	6.20434	6.94396
AGAP9	0.476976	4.81396	0.6473	0.115577	0.291379	0.240754	3.93058	0.188115	1.62485	0.264132	4.42289	2.43948	17.4252	0.354162	0.977255	1.12748
AGBL1	0.04465	0.082233	0	0	0.002935	0	0	0	0	0	0	0	0	0	0	0.043492
AGBL2	0	0	0	0	0	0	0	0	0	0	0	0.057559	0	0.008826	0	0
AGBL3	0	0.129591	0	0	0	0	0	0	0	0	0	0	0	0	0	0
AGBL4	0	0	0	0	0.006505	0	0	0	0	0	0	0	0	0	0	0
AGBL5	0	0	0	0	0	0	0.389642	0	0.209866	0	0.354177	0.219151	1.17993	0	0.420521	0.110027
AGER	0	2.35135	3.93626	0.995172	1.04361	0.492096	4.36473	0.427351	2.50794	1.11516	4.96843	2.40194	6.8837	1.60433	1.58403	1.51582
AGFG1	1.04333	0	2.43443	10.9399	10.0307	9.13208	36.9833	22.5078	23.1849	20.2144	32.5445	32.1316	16.3855	15.0137	15.3658	15.04
AGFG2	0.642806	0	0.182203	0.861117	0.104929	0.035648	1.13184	0.728553	0.184323	0.91923	0.084418	0.170283	0.737313	0.646957	0.077806	0.269421
AGGF1	0.257975	0.367993	1.60621	1.87905	0.817468	0.756516	2.8333	2.40194	0.957499	3.85561	2.40574	2.48218	3.25841	1.86648	0.503129	0.535277
AGK	0	0.986512	0.607379	0.65318	0.131311	0.13367	2.0515	0.884054	0.232101	1.93243	0.470062	0.261661	1.7536	0.259374	0.144116	0.465807
AGL	0.026283	0	0.698139	0.321344	0.018158	0.03269	0.704395	0.611289	0.034624	1.27384	0.155567	0.132376	1.14349	0.382282	0.037097	0.004803
AGMAT	0.337134	0.498402	0.052194	0.019163	0.006261	0	0.138986	0.090938	0.104278	0.236043	0.051578	0.041143	0.116223	0.041427	0.11615	0.300985
AGMO	0	0	0	0	0	0	0	0	0	0	0	0	0	0	0	0.044435
AGO1	0	0.832967	0.885805	0.050846	0.028486	0.011951	0.279299	0.130262	0.118697	0.292274	0.107739	0.039031	0.364318	0.094282	0	0.043919
AGO2	0.330038	0.267112	1.40306	5.66842	4.19653	2.98509	14.8208	8.04046	6.06247	8.52709	10.9286	8.70646	6.00944	7.143	4.30173	5.0474
AGO3	0.312089	0.383894	0	0.12468	0.053839	0	0.739008	0.072181	0.126763	0.408087	0.320802	0.48547	0.836452	0.03813	0.273286	0.106153
AGO4	0.324334	1.95995	1.0727	0.112075	0.086986	0.059447	0.980954	0.228408	0.080109	0.444468	0.250854	0.19552	3.75331	0.184113	0.025298	0.018717
AGPAT1	2.75039	1.75901	5.93267	16.8335	3.59733	2.92567	32.6292	28.1053	10.4536	44.4599	22.1691	21.2064	24.7435	18.8669	4.67627	3.90929
AGPAT2	9.77757	13.3383	13.4236	0.169139	0	0	0.451787	0.17801	0	0.772195	0.096366	0.025761	2.92374	0.176912	0	0.232276
AGPAT3	0.57894	0.651537	1.79494	6.98331	3.32182	2.86002	14.2272	11.3361	6.46688	13.7518	13.4347	11.8243	13.3456	8.64191	4.04405	4.87897
AGPAT4	0	0	1.06007	0.723158	2.45717	1.29411	5.20732	1.33068	3.16993	1.41406	4.97471	2.92707	6.52617	1.61995	3.1755	3.25353
AGPAT5	0.336523	0.564781	1.7176	3.29084	0.325126	0.24927	2.48078	3.0695	1.24852	6.75801	1.99669	1.25556	4.64577	2.38477	0.457737	0.592486
AGPS	0	0	0	0	0.018368	0	0.103017	0	0.095238	0	0.234894	0.022724	0	0.023896	0.130318	0.027611
AGR2	0	0.489464	0	0	0	0	0	0	0	0	0	0	0	0	0	0
AGR3	0	0	0	0	0	0	0	0	0	0	0	0	0	0	0	0
AGRN	0.287979	0.681754	8.73156	0.740167	0.183053	0.162231	9.12072	1.1414	2.43092	1.8896	2.88682	1.73798	10.6038	0.822172	1.474	1.86207
AGRP	0	6.78146	0	0	0.154009	0.123803	0	0	0	0	0	0	0	0	0	0
AGT	0	0	0	0	0.032006	0.010712	0	0.020111	0.056684	0.019516	0.111716	0.021472	0.240939	0.020815	0.060885	0.154065
AGTPBP1	0.484612	0.555453	1.19749	4.87264	6.41781	5.6876	9.64193	7.45324	7.66675	8.73153	12.1461	11.4412	10.8453	5.53043	7.41566	6.86364
AGTR1	0	0	0.117719	0	0.084654	0	0.018761	0	0.014084	0	0.069562	0.069448	0	0	0	0.015638
AGTR2	0	0	0	0	0	0	0	0	0	0	0	0	0	0	0	0
AGTRAP	3.01109	3.2024	7.09795	3.66037	3.18016	3.24847	6.77157	4.4884	12.7064	7.47469	13.5761	13.4244	41.0912	3.63062	5.63	6.7371
AGXT	0.22622	1.4981	0	0	0.01345	0.005636	0	0.021705	0.033594	0	0	0	0	0	0.009594	0.074591
AGXT2	0	1.57798	0	0	0	0	0	0	0	0	0	0	0	0	0	0
AHCTF1	0.54285	0.44615	0.914449	0.87422	0.977802	0.555408	5.12912	1.68232	2.47001	3.2085	2.74851	2.15047	4.51424	1.37835	1.39921	2.41353
AHCY	8.70964	4.96024	16.2372	5.37597	0.724242	0.771234	13.3734	7.87667	2.48692	26.4492	2.02669	1.7738	5.77959	4.2592	0.643045	0.81629
AHCYL1	0.988428	0.558564	3.49192	2.19848	2.01674	1.62741	8.73744	4.24901	5.94278	8.07585	10.2573	8.00168	6.67425	2.78334	3.5538	3.9578
AHCYL2	0.424028	0	0.625128	0.033927	0.088717	0.096212	0.386397	0.101427	0.314378	0.124864	0.313034	0.152037	0.525114	0.085668	0.110945	0.198416
AHDC1	0.620526	1.00257	2.99427	0.107084	0.19797	0.090667	1.72179	0.399481	2.0396	0.637827	2.57508	1.88673	2.3414	0.231326	0.408176	0.550133
AHI1	0	0	0	0	0	0	0.1982	0	0.018858	0.185384	0	0	0	0	0.004041	0
AHNAK	0	2.96969	2.07351	0	0	0	0	0.065885	0.211457	0	0.081057	0	0	0	0	0
AHNAK2	0.177516	0	0.352501	0.017092	0	0	0	0.018028	0.033243	0	0.066952	0	0.186686	0	0	0
AHR	0	0	0.465623	0.064415	0.029745	0.046602	1.05523	0.597295	0.278798	1.60571	0.712403	0.415496	1.61794	0.207167	0.017518	0.007906
AHRR	1.56182	2.25476	2.50481	0.105416	0.128837	0.077171	1.90645	0.254318	1.51077	0.700956	0	0.528675	7.58696	0.402062	0	1.01558
AHSA1	3.30845	0	8.42362	11.8893	17.0128	14.7737	46.3601	24.8348	52.7079	51.8327	84.1802	73.1621	36.8797	19.6891	32.1086	30.8545
AHSG	0.407665	0	0	0	0	0	0.05986	0.021868	0	0.267901	0	0	0.342452	0	0	0.149925
AHSP	2.02154	0	4.14591	4166.74	1539.94	1648.98	1333.98	2959.55	1917.88	4072.84	3733.71	3564.95	2911.88	3741.14	1989.94	1942.48
AICDA	0.868829	0	0.213487	0.03206	0	0	0	0	0.02325	0	0	0.011466	0.03237	0	0.019919	0.090343
AIDA	0	0.763156	5.05829	22.0038	9.09583	9.0898	26.6919	24.9515	14.4917	41.3227	36.6449	33.0583	36.9908	17.8654	9.31872	7.90308
AIF1	20.7038	27.3975	10.7988	2.41643	0.156754	0	0.112175	0.841077	0.170179	0.808895	0.204563	0	6.94326	1.53535	0.435332	0
AIF1L	0	0	0	0	0	0	0	0.026392	0	0	0	0	0	0	0	0
AIFM1	0	0.653456	1.39964	0.899979	0.242672	0.159216	1.13884	1.11147	0.592957	2.43882	2.0175	2.08381	0.582256	1.03623	0.546544	0.585931
AIFM2	0	0	0.320681	1.1299	0.853515	0.586689	2.55765	0.980246	1.5485	1.72271	3.14622	2.95351	2.08328	1.13011	0.866101	1.22194
AIFM3	0.168331	2.85216	1.3242	0	0.041768	0.048957	0.111089	0	0.08339	0.016556	0.034326	0	0.193258	0	0.10715	0.084405
AIG1	0	0	1.95539	1.6025	0	0.031724	1.25482	0.559435	0.063254	1.42925	0	0.124489	0.770501	0.505886	0	0.140781
AIM2	0	0.123753	0	0.024098	0	0	0	0	0	0.093114	0	0.077078	0	0.025938	0	0.028958
AIMP1	1.3457	0	0	0.477622	0.655198	0	2.69879	3.9858	1.21581	1.75135	4.7516	1.76513	6.69192	1.43711	1.47311	1.20588
AIMP2	1.91559	1.56799	1.98681	7.94091	1.60014	1.79365	5.55003	8.57217	10.8749	11.5368	9.9116	9.72596	10.412	6.2576	6.9522	9.66534
AIP	3.84799	2.67358	4.54645	1.10793	0.445369	0.579792	5.77536	2.9458	4.48487	5.56921	3.35059	2.89866	7.39005	3.32236	1.67707	1.39446
AIPL1	4.67179	0	0	0	0	0	0	0	0	0	0	0	0	0	0.831928	0
AIRE	0	0	0	0	0.014617	0	0	0	0	0	0.030066	0	0	0.012085	0	0
AJAP1	0.005063	0.311678	0	0	0.014973	0	0	0	0.014997	0	0	0.004933	0	0	0.002143	0.024965
AJM1	0.912789	0.137145	0.906739	0.124899	0.210552	0.108193	1.16539	0.270473	1.25361	0.162169	2.05764	1.32859	3.85932	0.220468	0.884021	1.21655
AJUBA	0	0.253409	3.23872	0	0.036306	0	0.151306	0	0.037824	0.045067	0.009365	0.029851	0.116117	0.015022	0.051863	0.142749
AK1	0.612012	0.951724	2.97836	8.74727	2.2859	2.33432	9.24103	7.64212	5.42779	9.68846	11.0899	7.61956	14.6741	9.82813	2.79079	4.6243
AK2	4.00134	3.15528	3.3218	3.64702	0.080058	0.07744	2.81677	3.93774	1.45072	10.7726	1.3124	1.04772	5.92532	2.84401	0.202508	0.254051
AK3	0.166124	1.5083	3.03513	2.86472	0.748113	0.605262	3.68419	3.65117	4.5402	5.48964	5.87942	4.47159	15.3393	2.16487	2.1054	2.2214
AK4	0.695333	0.684073	0.437744	1.26367	0.181695	0.188687	6.17774	6.11467	2.44901	9.58652	7.1633	5.8182	7.38382	3.24629	0.405331	0.368477
AK5	0.474814	0.842404	3.49391	0	0	0	0.026097	0	0	0	0	0	0	0	0	0.10867
AK6	1.22032	0.360265	1.85246	3.37513	3.62408	3.75477	4.77988	3.61729	8.33132	9.09724	9.37833	9.02436	9.88723	2.77637	5.59533	5.43203
AK7	0	0.116885	0	1.38343	0.381115	0.388877	1.7207	1.7342	0.352056	3.113	1.06441	0.916411	0.926798	1.80734	0.27652	0.303973
AK8	0	0	0	0.082756	0	0	0	0.108922	0	0	0.055168	0	0.527263	0.044582	0	0
AK9	0	0.105231	0.058252	0.050224	0.033935	0.034408	0.121966	0.151123	0.085444	0.25591	0.211699	0.1112	0.115961	0.082356	0.012551	0.016252
AKAIN1	0	0	0	0	0.006328	0	0	0	0	0	0	0	0	0	0	0
AKAP1	0	0	0	0	0.046059	0	0	0.310151	0	0	0	0	0	0	0	0
AKAP10	0.534486	0	1.21743	1.49129	1.55774	1.03302	5.61796	2.40118	3.5215	4.16245	5.90933	4.28684	7.47309	1.9373	2.25834	2.63182
AKAP11	0.080611	0.271616	1.31799	0.507792	0.148601	0.180422	2.02246	1.10753	0.541993	1.90112	1.62522	1.22065	1.83341	0.707977	0.107621	0.142726
AKAP12	0.072946	0.103622	3.43771	0.052825	0.008635	0.010886	1.73437	0.494828	0.018014	1.22786	0.214406	0.167077	0.886778	0.203791	0.009265	0.095961
AKAP13	0.184102	0	0.747605	0.067798	0.030686	0.022905	0.219951	0.082547	0.017059	0.117109	0.070445	0.095374	0.111206	0.169335	0.019495	0.025246
AKAP14	0	0	0	0	0	0	0	0	0	0	0	0	0	0	0	0
AKAP17A	0	5.02482	3.43433	2.08848	4.01727	2.01801	14.0056	2.9465	20.2385	6.40729	18.9621	13.5246	24.3781	4.11383	13.581	18.9296
AKAP3	0	0.277327	0	0	0	0	0.051546	0.018731	0.019335	0	0.023915	0	0.107794	0.028802	0	0
AKAP4	0	0	0	0	0.109094	0.085708	0.332846	0	0	0.297547	0.028066	0.167965	0	0	0.068086	0
AKAP5	0.21141	0.295719	0.05528	0	0	0	0.006333	0.013781	0.014243	0.005657	0.035302	0	0.019906	0.023561	0.004069	0.010539
AKAP6	0.044741	0	0	0.003678	0.009621	0	0.029476	0.013589	0.002008	0.019143	0	0.001981	0	0.013946	0.005164	0.011141
AKAP7	0.620134	0	0.051195	0.558331	0.253495	0.328099	0.163614	0.185392	0.051147	0.186244	0.213621	0.188569	0.598626	0.184729	0.175294	0.28153
AKAP8	1.12338	1.85959	1.61648	1.06065	2.13434	1.67812	11.2627	3.28877	2.34347	7.68454	4.67668	4.08903	8.73712	3.79858	3.08711	2.28997
AKAP8L	5.47673	1.34861	33.2125	13.41	21.6214	16.0061	28.7664	15.2709	26.8512	21.6192	34.969	28.0537	48.3207	17.3094	18.7015	24.0242
AKAP9	0.09755	0.369589	0.920135	0.30597	3.9184	2.34866	4.41544	0.662711	3.79102	0.799575	7.3073	4.66616	8.11204	0.780604	3.57468	4.29167
AKIP1	0.782185	3.54861	2.12072	3.82656	0.578731	0.692421	2.58717	3.29607	1.34762	5.13428	1.83767	1.15101	8.91509	2.8026	0.691909	0.865154
AKIRIN1	1.25409	4.76833	7.34024	11.1951	8.91616	6.88746	19.7121	17.3626	11.2868	25.8039	14.7596	13.1497	10.3204	12.9904	8.81417	7.82677
AKIRIN2	2.03757	3.22406	4.14198	13.0061	13.2278	11.6662	21.72	16.7688	17.4153	22.8062	19.6692	18.6313	31.3708	14.3348	14.435	15.9331
AKNA	1.198	2.24572	2.42467	0.014505	0.024629	0	0.425071	0.103361	0.10802	0.122426	0.090856	0.033764	0.869333	0.096427	0.006145	0.099802
AKNAD1	0	0	0	0	0	0	0	0	0	0	0	0	0	0	0	0
AKR1A1	2.33281	9.30637	6.94053	1.48683	0.262683	0.28573	2.5102	2.54285	1.79409	5.86731	3.14325	2.73759	4.67594	1.29832	0.487426	0.560608
AKR1B1	4.643	7.76606	29.4902	0.382277	0.451367	0.637075	9.37169	3.08018	5.06534	7.86985	12.7949	11.3753	18.4825	1.52515	0.629006	0.549612
AKR1B10	0	0	0.109536	0.020075	0	0	0	0	0	0	0.080337	0.021444	0	0	0	0
AKR1B15	0	0	0	0	0	0	0	0	0	0	0	0	0	0	0	0
AKR1C1	0.085716	0.090181	0.372521	0.334333	0.952663	0.922941	0.535956	0.017428	0.89702	0.028606	1.13088	1.29377	1.49246	0.021629	0.982747	0.947248
AKR1C2	0	0	0.828716	0.044869	0.343155	0.093533	0.330454	0	0.114673	0	0.452828	0.263935	1.32529	0	0.169541	0.182827
AKR1C3	0	1.82417	1.61104	0	0	0	0	0	0.832906	0	0	0	1.48636	0	0	0.382492
AKR1C4	0	0	0	0	0	0	0	0	0	0	0	0	0	0	0	0
AKR1C8P	0	0	0	0	0	0	0	0	0	0	0.100184	0	0	0	0	0
AKR1D1	0	0	0	0	0	0	0	0	0	0	0	0	0	0	0.103658	0
AKR1E2	0	0	0	0.369942	0	0	0	0	0	0	0	0.163671	0.304969	0	0	0
AKR7A2	0.972667	4.98174	7.64421	5.11923	0.129705	0.081058	4.62721	5.51799	1.86801	12.7345	0.990533	1.2978	2.63392	3.74398	0.597974	0.371186
AKR7A3	0	3.73923	0	0.114676	0.093484	0	0	0.030154	0.216652	0	0.07594	0	0.383694	0.092452	0.026483	0.137566
AKR7L	0	0.571779	0.152579	0	0.109294	0	0.040082	0	0	0	0	0.029724	0.166254	0	0	0.033513
AKT1	1.2589	2.59475	3.30043	2.29284	0.133413	0.374123	5.0338	3.67955	2.0294	5.10121	2.21802	1.90471	7.50266	2.04717	0.906305	0.92505
AKT1S1	3.00007	3.81	7.51316	22.3101	30.4222	26.9331	65.2564	35.173	38.9554	40.4149	62.5567	54.5342	69.4204	37.3791	34.172	41.1549
AKT2	1.37855	0.894495	3.90471	5.9852	6.03138	5.14361	19.3976	10.1258	14.5674	10.1065	22.1271	18.1446	20.1874	9.19482	8.30242	9.99113
AKT3	0	0	0.609527	0	0	0	0.054963	0	0	0	0	0	0.487485	0	0	0.090051
AKTIP	0	0.560447	0.973766	0.144957	0	0.012209	0.241479	0.126685	0.045925	0.12007	0.143526	0.108214	1.3212	0.032753	0.041526	0.06025
AL021546.6	0	0	0	0	0.088837	0.187626	0.661357	0	0.750058	0.585037	0	1.20445	1.13432	0.211222	0	0.117923
AL135749.6	0	0	0	0	0	0	0	0	0	0	0	0	0	0	0	0.094124
ALAD	1.60329	1.35444	2.13164	59.3202	14.8981	12.1983	60.8051	62.6705	16.43	77.4651	68.4895	60.8784	38.1011	70.7224	14.9313	16.0239
ALAS1	0.799441	0	4.00492	2.32063	1.09623	0.917136	8.92927	3.96827	3.45544	5.90958	5.55474	4.57985	8.98271	3.54449	0.896026	0.968045
ALAS2	0.284516	0	0.074235	1048.94	657.018	631.367	1107.49	1155.58	652.565	1489.78	866.445	771.614	907.694	1132.42	587.432	617.268
ALB	0	0	0	0	0	0	0	0	0	0	0	0	0	0	0	0
ALCAM	0.861846	1.09949	3.19226	0.018323	0.003993	0	0.026633	0	0.013314	0.023796	0.016487	0.045972	0.529756	0.059478	0.01141	0.022599
ALDH16A1	0	2.11066	0	0.419928	0.246633	0.35269	0	0.821715	0	0.74438	0	0	1.64356	0	0	1.53418
ALDH18A1	0.715009	1.58261	5.02254	5.10242	0.172178	0.096255	5.59511	4.43666	0.315517	14.9338	1.04075	0.848815	2.88893	2.86751	0.180236	0.403325
ALDH1A1	0.649606	1.4586	5.41598	0.444814	0.067786	0.032404	0.085768	0.140624	0.112707	0.057535	0.119196	0.06351	4.62874	0.144023	0.041371	0.035758
ALDH1A2	0.208497	0	0	0	0	0	0	0	0	0	0	0	0	0	0	0.061636
ALDH1A3	0	0	3.15251	0	0	0	0	0	0	0	0	0	0	0	0	0
ALDH1B1	1.01423	1.32707	2.7445	0.912731	0.038479	0	2.22058	1.32473	0.181563	3.33366	0.567824	0.474057	0.833135	0.562216	0.045754	0.260847
ALDH1L1	0	0	0	0	0	0	0	0	0	0	0	0	0.028634	0	0	0.011407
ALDH1L2	0	0	0.268589	0	0	0	0	0	0	0	0	0	0	0	0	0
ALDH2	0.544376	1.17841	1.52684	0.769611	0	0	0.368531	0.219358	0.231349	0.61285	0.296502	0.088845	1.95619	0.573892	0.08546	0.575589
ALDH3A1	0	0	0.639558	0	0	0	0	0	0	0	0	0	0.330967	0	0.020489	0
ALDH3A2	0.718894	0.265905	2.12579	0.074335	0.012144	0.010182	0.242655	0.137189	0.151708	0.277137	0.086965	0.011617	1.70525	0.040179	0.042799	0.213326
ALDH3B1	0.928663	0	0.401943	6.92168	7.38768	6.87167	15.7387	12.5291	20.6287	17.8926	44.5184	39.3708	2.49924	7.44697	8.77078	7.56609
ALDH3B2	0.212597	0.251341	0	0	0	0	0	0	0	0	0	0	0	0	0.045102	0.146137
ALDH4A1	0	1.43684	1.99028	1.21205	0.11445	0.055856	2.0487	1.48859	0.475774	4.071	0.430526	0.678129	0.881126	0.961467	0.095084	0.193713
ALDH5A1	0.662172	0	0	0.686098	1.77556	1.41983	2.63998	1.49067	0.998816	1.71477	2.75356	1.72018	0.666649	1.22795	0.832847	0.741026
ALDH6A1	0.172496	0.762123	1.00747	0.787048	0.58708	0.58696	1.71188	1.21972	1.44875	1.68124	1.91412	1.63441	1.11552	0.886249	0.810298	1.17026
ALDH7A1	0.228441	0	5.05617	0	0	0	0	0	0	0	0	0	0	0	0	0.043335
ALDH8A1	0	0	0	0.011957	0.132796	0.09159	0.43301	0.012605	0.130001	0.030973	0.19271	0.102572	0.488312	0.012916	0.178187	0.263318
ALDH9A1	0.98038	0.498095	4.51929	4.46325	1.25392	1.00175	3.5414	5.11751	1.34317	9.58507	4.9128	5.02715	3.09539	3.98712	1.35158	1.23611
ALDOA	2.92494	0	2.25772	8.51241	0	0	22.2784	17.3274	0.72827	42.679	0.798953	0	0	10.7221	0	0.206234
ALDOB	0	0	0	0	0.016451	0	0.054698	0	0	0	0.050706	0	0.095164	0	0.011724	0
ALDOC	0	0	2.64304	10.7924	0.594371	0.495879	18.4811	20.2369	3.45134	43.4578	7.88599	5.87117	4.67627	12.6592	0.522586	0.964961
ALG1	0	0	0.316452	0.103406	0	0	0	0	0	0	0	0.057715	1.71468	0	0	0
ALG10	0	0	0	0	0	0	0.776687	0.376275	0.134729	0.663409	0	0.677348	0.381308	0.209468	0	0
ALG10B	0	0	0.829607	0.090208	0.058463	0	0.249902	0.470343	0	0.770299	0	0.186544	0.378929	0.190531	0	0
ALG11	0	0	0	0	0	0	0.512508	0.044169	0	0.04774	0	0.045614	0.508344	0.046487	0	0
ALG12	0	0.29238	0.743206	0.505246	0.19646	0.184499	1.4986	0.797077	1.28489	1.34126	1.65104	1.15083	1.64066	1.04317	0.656557	0.92538
ALG13	0	0	0.157317	1.29932	1.01743	1.08314	1.43218	1.49072	2.21373	3.03712	2.79881	2.28557	3.92791	1.29071	1.69817	1.45382
ALG14	0.157628	1.01079	0.150941	0.276386	0.02915	0.039202	0.138487	0.216446	0.074601	0.587501	0.156855	0.112013	0.29944	0.128744	0.025023	0.093589
ALG1L2	0	0.884661	0	0	0.05052	0	0	0	0	0	0	0.041054	0	0	0	0.046337
ALG2	0.351539	1.41335	2.20813	2.28506	1.51762	1.39613	4.88638	2.23066	7.39864	6.29996	10.5336	8.93517	9.73516	2.76783	6.16522	6.23176
ALG3	1.61217	3.20515	5.41841	4.05603	0.919953	0.529259	7.22149	6.89992	4.64879	14.7389	4.22235	3.37899	5.4747	5.03634	2.43671	0.787267
ALG5	1.4369	0	2.02855	2.15676	0.176169	0	2.14595	2.07001	1.25781	7.77615	1.01363	0.984312	6.90735	2.08124	0	0.870216
ALG6	0	0.942144	0.26157	0.590282	0.009607	0.007932	0.590051	0.502258	0.131651	0.977663	0.170563	0.115813	0.358801	0.498504	0.013574	0.036815
ALG8	0.582942	1.10177	2.52967	0.888385	0.046433	0.067897	2.513	2.24356	0.424883	4.66353	1.30757	1.00807	0.721934	1.18618	0.099073	0
ALG9	0.268914	0	0.259107	0.359824	0.022414	0.025145	0.577387	0.3415	0.207685	0.844468	0.525838	0.480156	1.75985	0.199469	0.063041	0.105625
ALK	0.185447	0.501129	0	0	0	0	0	0	0.131212	0	0	0	0	0	0	0
ALKAL1	1.07856	0	0	0	0	0	0	0	0	0	0	0	0	0.033454	0	0
ALKAL2	0	1.36339	0	0	0	0	0.042499	0	0	0	0.117684	0.094566	0.088075	0	0.027369	0.035547
ALKBH1	0	0	0.042408	0.533445	0.243909	0.329546	1.12704	1.66264	0.887281	3.10185	1.68388	0.706578	1.36068	0.443666	0.139615	0.487129
ALKBH2	0.279163	2.2999	1.26686	0.731381	0	0.023363	0.061786	0.411063	0.185903	0.698608	0	0	0.984096	0.3861	0.152915	0.103488
ALKBH3	1.89507	2.84546	1.97978	2.16831	0.180366	0.312584	2.59512	3.65804	0.426012	8.1698	1.77588	1.31811	5.59296	2.95414	0.364933	0.221048
ALKBH4	0.943975	1.19249	0.853486	0.369434	0.020011	0.05683	0.793924	0.935629	0.354552	1.74498	0.338912	0.286466	1.55513	0.479495	0.226055	0.701203
ALKBH5	0	0	2.24065	3.72926	6.98044	4.5818	17.6504	12.4838	12.5973	11.7237	13.93	12.4598	0.930518	6.11782	6.03618	4.09075
ALKBH6	0	0.703335	0.10256	0.630051	0.233386	0.098998	1.14284	0.763107	0.748838	1.09934	1.71076	1.53693	1.10231	0.782805	0.19321	0.21259
ALKBH7	6.33444	8.44174	8.26355	4.91708	13.394	12.3335	27.6653	15.7783	26.0554	14.91	35.6494	32.5511	14.4202	10.167	15.6238	13.7891
ALKBH8	0	0.22295	0.271692	0.256602	0.027954	0.011728	0.294558	0.338368	0	1.23983	0.096123	0.130232	0.725941	0.239016	0	0
ALLC	0	0	0	0	0	0	0	0.024346	0	0	0.030775	0	1.00357	0	0	0
ALMS1	1e-06	0.528788	1e-06	0.398638	0.119954	0.155714	2.00558	0.585273	0.431615	0.838681	1.07088	1.18252	0.842736	0.603037	0.098226	0.168047
ALOX12	0.615773	1.71635	1.6919	0.140334	0.797243	0.655879	1.84715	0.492328	1.61131	0.353707	0.976005	1.03799	2.4591	0.289323	0.886527	1.50586
ALOX12B	0.108413	0	0	0	0.03151	0	0.017466	0.025424	0.01311	0	0	0.012929	0	0.039074	0.033691	0.101887
ALOX15	0	0	0	0	0	0	0.080821	0.035279	0.036392	0	0	0	0	0	0	0.013468
ALOX15B	0.316806	0	0	0	0	0.006964	0.036874	0	0	0	0	0.040948	0	0	0	0
ALOX5	0	0	0.255185	0.051079	0.249027	0.06984	3.31474	0.309591	1.73182	0.396788	2.19039	1.68358	15.3619	0.082742	0.20211	0.348402
ALOX5AP	3.44906	4.28593	4.80975	1.5051	0	0.046233	1.38531	0.358442	0.030661	0.474556	0	0	2.40776	0.946392	0.052473	0
ALOXE3	0	0.341762	0.031786	0.043769	0.075588	0.033581	0.127041	0.009232	0.095303	0.011354	0	0.018802	0.288353	0.018929	0.048997	0.097515
ALPG	0	0.537431	0	0	0.015918	0	0.017646	0	0.013245	0	0	0	0	0	0.022692	0.279402
ALPI	0	0	0	0.054662	0	0	0	0	0	0	0	0	0	0	0.025492	0.121101
ALPK1	0	1.08836	0.447976	0	0.039451	0.024091	0.125541	0.01851	0.046154	0.028506	0.170875	0.091492	2.09933	0.041559	0.046134	0.059746
ALPK2	0.033357	0.28626	1.03566	0	0	0	0	0	0	0	0	0	0	0	0	0.020083
ALPK3	0.108005	0.160273	1.18171	0.002715	0.033728	0.010712	0.194942	0.005731	0.097779	0.017654	0.124932	0.078938	0.085144	0.014701	0.02794	0.082206
ALPL	0	0	6.662	0.346447	0.023414	0	0.138442	0.415607	0	0.851008	0	0	0.216838	0.180661	0.022254	0.187472
ALPP	0	1.10414	0	0	0	0	0.031591	0	0.011853	0	0	0	0	0	0.030466	0.118439
ALS2	0	0	1.17504	0.154406	0.62558	0.533305	1.18731	1.05516	0.362589	1.92664	0.432918	1.01284	0.767795	0.819755	0.311668	0.138172
ALS2CL	0	0	0.200973	0	0	0	0	0	0.027693	0	0	0.086561	0.01556	0	0	0.036721
ALX1	0	0	0	0	0	0	0	0	0	0	0	0	0	0	0	0
ALX3	0	0	0	0	0	0	0.377217	0	0	0.063637	0.237673	0.074163	0.026356	0	0.093826	0.059131
ALX4	0.164148	0.077707	0	0	0.009726	0	0	0	0	0	0	0	0	0	0.032444	0.108036
ALYREF	10.7672	10.0196	21.6162	110.29	5.93795	5.9438	33.8564	79.255	13.5252	167.425	31.5718	34.0589	90.8867	77.325	10.5724	12.9512
AMACR	0	0.551281	0.269829	0	0	0	0	0	0	0.023216	0	0.007579	0.041836	0	0.013168	0.034112
AMBN	0	0	0	0	0	0	0	0	0.01694	0	0	0	0	0	0	0.056436
AMBP	0	0	0	0.136544	0	0	0	0	0	0	0	0	0	0	0	0
AMBRA1	0.426961	1.2334	0.619947	3.24546	11.4795	8.44065	31.8703	9.50688	13.0334	10.4835	21.2575	17.1587	15.8795	8.99799	10.7886	13.1116
AMD1	0	1.12608	3.54976	6.22832	2.66404	3.36402	0	1.42643	4.44165	0	2.23797	5.18241	11.015	2.27936	3.12041	1.66275
AMDHD1	0	0	0	0	0	0	0	0	0	0	0	0	0	0	0	0
AMDHD2	0.444852	2.91197	2.22668	2.30401	11.842	10.2825	20.7882	3.76665	33.7609	3.47302	16.4107	14.7714	24.7967	5.07971	26.4531	29.4244
AMELX	0	0	0	0	0	0	0	0	0	0	0	0	0	0	0	0
AMELY	0	0	0	0	0	0	0	0	0	0	0	0	0	0	0	0
AMER1	0.11021	0.104372	0.14478	0.049882	0	0.00731	0.159773	0.059669	0.054433	0.177297	0.062987	0.042967	0.03045	0.02881	0.024885	0.036246
AMER2	0.133051	0.506801	0.056959	0	0.001711	0	0	0	0	0	0	0.002819	0.007993	0	0.019589	0.110951
AMER3	0.512352	0.974996	0	0	0.002976	0	0	0	0.009928	0	0	0.009795	0	0	0.029782	0.115692
AMFR	0.999948	1.90105	4.66755	11.4459	11.7839	11.2645	35.302	24.9939	31.4388	23.7141	37.1591	32.8506	26.3524	19.8505	24.5235	25.8208
AMH	0	0.454368	0.951497	0.130564	1.44262	0.586426	2.85424	0.53225	4.25863	0.094369	2.06238	1.6356	2.85745	0.770593	5.61504	7.4512
AMHR2	0	0	0	0.140773	0.040859	0.042712	0.497395	0.049443	0.186773	0.060673	0.251312	0.117202	1.17848	0	0.038906	0.03771
AMIGO1	0	0.56685	0.030314	0	0.007281	0	0.008096	0	0	0	0	0.005989	0.076303	0	0.005203	0.020214
AMIGO2	0	0	1.44875	0.526892	0.131671	0.161441	4.18565	3.18757	2.32928	5.26887	3.35244	2.29776	36.2186	1.33241	0.404987	0.281044
AMIGO3	0	0	0.127269	0.061269	1.31532	0.258389	3.68281	0.241904	2.08307	0.123313	1.96938	0.634245	1.61034	1.32185	0.647453	2.07629
AMMECR1	0.611122	0.709309	0.560665	14.3714	3.92148	2.69819	22.5591	14.9916	9.31584	24.7765	13.3284	9.72592	15.7227	12.2097	5.52067	6.2626
AMMECR1L	0.134936	0.862209	1.39946	1.02818	4.06472	3.0229	4.76852	2.05336	4.51222	2.76454	4.4442	3.3387	10.4489	2.04947	6.05406	7.18186
AMN	0	0	0.269421	0	0	0	0	0	0	0	0	0	0.190223	0	0	0
AMN1	0.24661	0	0.321856	0.370242	0.094607	0.175788	0.395451	0.390093	0.471718	0.81157	0.56017	0.447917	0.94557	0.191039	0.074812	0.155213
AMOT	0	0	0.200293	0.004089	0	0	0.029752	0.012946	0	0.031891	0.011057	0	0	0	0	0
AMOTL1	0	0	1.42907	0	0	0	0.099211	0.074082	0	0	0.181328	0	0.202113	0	0	0
AMOTL2	0	0	3.58888	0	0	0	0	0	0	0	0	0	0.05375	0	0	0
AMPD1	0	0	0	0	0	0.035844	0	0	0	0	0	0.037436	0	0	0	0
AMPD2	1.27586	0	0	0.11489	0.580274	0.234481	0.87762	0.157291	0.178731	0.647478	0.344632	0.248134	0	0.059294	0.45618	0.72372
AMPD3	0	0	0	0.111485	0	0	0.557431	0	0.280255	0.17676	0	0	0	0.683901	0	0
AMPH	0.624854	0	0.282825	0	0	0	0	0	0	0	0	0	0	0	0.008546	0.033217
AMT	0	1.2775	1.34577	0.218754	0	0.082877	0	0.058929	0	0	0	0	0.493899	0.181498	0	0
AMTN	0	0	0	0	0	0	0	0	0	0	0	0	0	0	0	0
AMY1A	0	0	0	0	0	0	0	0	0	0	0	0	0	0	0	0
AMY1C	0	0	0	0	0	0	0	0	0	0	0	0	0	0	0	0
AMY2A	0	0	0	0	0	0	0	0	0	0	0	0	0	0	0	0
AMY2B	0	3.19046	0.77497	0.027079	0.441271	0.184889	1.12031	0.015515	0.726439	0.036661	0.716994	0.328604	8.32264	0.09042	0.582666	0.698833
AMZ1	0	0.148168	0.290173	0	0.010117	0.003057	0.157549	0.005443	0.14062	0	0.097556	0.049945	0.188578	0.005583	0.033746	0.118617
AMZ2	1.0991	1.12233	1.30264	1.86071	0.92576	1.05711	2.75452	2.19273	2.57557	4.18095	5.71021	5.3777	5.56592	1.71504	1.41788	1.08096
ANAPC1	0.936391	0.72851	1.01915	0.544027	0.069272	0.057818	2.19127	1.2064	0.234358	3.29752	1.13989	0.592133	2.01479	0.772764	0.075917	0.247067
ANAPC10	0	0.596824	0.594568	1.34385	0.377732	0.235861	0.600654	1.37288	0.511563	2.58664	1.01497	1.4823	1.87642	0.74532	0.263955	0.654664
ANAPC11	4.74257	23.9153	27.7017	78.7212	14.9637	16.6144	65.1716	93.3102	86.9675	147.622	79.0457	89.319	126.151	74.9812	49.5157	49.8661
ANAPC13	2.08671	4.84425	7.01951	7.97767	1.20521	1.02436	8.29164	10.2887	5.59917	17.9693	7.36741	6.00574	16.2529	5.86027	2.25095	3.04307
ANAPC15	0.828258	0.842325	0	0.200953	0.321094	0.328446	0.451662	0.118337	0.401144	0.167102	0.535818	0.407795	0.077493	0.168596	1.28488	0.688688
ANAPC16	0.405099	0.542662	0.662305	3.10026	2.92976	3.33344	2.54919	4.58325	7.67739	4.30841	8.72788	7.87122	8.32821	2.93355	5.76693	5.97669
ANAPC2	0.747826	2.44408	5.12166	4.22977	3.77242	2.87167	16.3904	6.67012	14.3348	9.06321	14.6647	10.9296	32.7967	6.32368	8.78811	13.3052
ANAPC4	0.15082	3.32869	1.8295	0.84701	0.104694	0.062642	1.27707	1.18261	0.609917	2.80043	0.953533	0.734502	5.10217	0.989253	0.161774	0.234014
ANAPC5	2.78605	2.48069	5.86845	3.84389	1.61031	1.13604	9.77233	7.14623	6.17189	16.4215	10.4475	6.20754	8.37009	5.16601	3.658	3.93579
ANAPC7	0	0.528956	3.88932	1.3416	0.62233	0.618034	6.01208	3.14571	1.47494	7.10279	3.54257	2.60746	7.56118	2.8066	0.896051	1.0532
ANG	0	0	0.51827	0	0.129917	0.015443	0	0.089798	0.06145	0	0	0.090836	0.38095	0	0.026291	0.238986
ANGEL1	0.398122	0.58747	0.761575	0.196403	0.152328	0.088832	1.03235	0.455335	0.533036	1.16144	0.531801	0.336524	1.20418	0.266339	0.36291	0.42871
ANGEL2	0.220746	0.989692	1.15359	1.38187	0.211109	0.16584	1.38573	1.15721	0.77543	2.49837	1.13849	1.18117	4.78809	1.11884	0.460689	0.62051
ANGPT1	0.180725	0.392015	1.38315	0.013669	0	0	0	0	0	0.062109	0	0	0	0.04436	0	0.010421
ANGPT2	0	0.508865	0.039302	0	0.00708	0.002972	0	0.022853	0.03542	0.014068	0.021938	0.005824	0.01649	0.01172	0.035417	0.032761
ANGPT4	0.14843	0.063867	0	0	0	0.013434	0	0	0.013341	0	0.00826	0.026323	0.009313	0	0	0.088848
ANGPTL1	0	0	0.135113	0	0.010809	0.004533	0	0.008722	0	0	0.022282	0	0.163221	0	0	0.029988
ANGPTL2	0	0.13324	3.03535	0	0	0	0	0	0.018576	0	0	0	0	0	0	0
ANGPTL3	0	0	0	0	0	0	0.014778	0	0	0	0.013708	0	0	0	0	0.036931
ANGPTL4	0	0	0	0.869576	0.062375	0.1517	0.583594	0.301012	0.808603	0.12004	0.120774	0	1.1401	0	0.470425	0.871539
ANGPTL5	0	0	0	0	0	0	0	0	0	0.033411	0	0	0	0	0	0
ANGPTL6	0.083999	0.45175	0.715343	0.084514	0.015139	0	0.067312	0.023356	0.023554	0.089641	0	0	0.29576	0	0	0.309393
ANGPTL7	0	0	0	0	0.045249	0	0	0	0.075259	0	0.018579	0.059374	0.083664	0	0.012893	0.016713
ANGPTL8	0	0	0	0.028428	0	0	0	0	0.030693	0	0	0	0.253707	0.122242	0.052527	0.204632
ANHX	0	0	0	0	0	0	0	0	0	0	0	0	0	0	0.016373	0
ANK1	0.442721	0.159888	0.37584	57.9499	108.76	77.6866	225.611	98.3501	128.3	98.7609	233.704	187.575	152.448	115.306	114.738	140.745
ANK2	0.107668	0	0.29648	0	0	0	0	0	0	0.004526	0	0	0.084988	0	0.003256	0.004216
ANK3	0	0.169265	0.196289	0.003231	0.005283	0.000888	0	0.003411	0.001764	0.010512	0.002189	0	0.00247	0.00175	0.001512	0.013704
ANKAR	0	0.249085	0	0	0	0.004906	0	0	0.007591	0	0	0	0.072674	0	0	0.040359
ANKDD1A	0	0	0.069444	0	0.006248	0.036663	0.069346	0.010083	0.239333	0.049588	0.28308	0.102641	0.88434	0	0.044579	0.173278
ANKDD1B	0	0	0	0	0	0	0.140288	0	0.021084	0	0.051929	0	0.116804	0	0	0.046836
ANKEF1	0.034719	0.027392	0	0.020982	0	0	0	0.038746	0	0.01363	0.007085	0.011286	0	0.005677	0	0.006348
ANKFN1	0	0	0	0	0	0	0	0	0	0	0	0	0	0	0	0
ANKFY1	0.214755	0.2337	1.54224	1.04706	0.503713	0.289695	3.799	1.32577	1.06178	2.45596	2.11909	1.53758	8.51727	1.46029	0.583798	0.679229
ANKH	0.112981	0.873784	3.51714	7.08477	5.50993	4.73915	17.0642	13.4208	9.5826	12.8346	20.7744	18.9742	14.0026	11.3895	6.55236	7.13642
ANKHD1	0.408204	0	0.276983	3.70415	2.39699	2.31965	13.3791	5.82595	12.4597	11.5971	13.3832	12.4613	4.57417	6.22276	6.44968	7.40085
ANKHD1-EIF4EBP3	1.71929	7.76746	6.50278	1.50183	3.69461	2.74975	11.8127	3.55859	8.22768	5.60894	12.0804	8.69248	16.0762	3.25327	6.19876	8.34567
ANKIB1	0.482235	0.367703	1.64199	0.48148	0.36435	0.239947	1.92916	0.851554	0.773143	1.85992	2.98875	2.00056	4.41937	0.574312	0.370933	0.339995
ANKK1	0.468577	0	0	0	0.007747	0	0	0	0.038677	0	0.015927	0	0.233179	0	0.044178	0.07157
ANKLE1	0.078931	0.931648	0	16.6881	9.33005	7.1834	24.7984	13.4716	12.0046	15.3794	21.6749	16.5656	18.2606	18.6031	11.792	11.981
ANKLE2	0.201401	1.32757	5.53522	2.42368	1.3343	0.927717	11.0564	4.10076	4.59385	5.87533	6.38949	5.20095	23.6	4.20606	2.45441	2.8682
ANKMY1	0	0.70908	0.20312	0.09939	0.569627	0.319409	2.1649	0.536954	2.38604	0.303262	3.29985	2.12884	2.71161	0.356913	1.35425	1.8117
ANKMY2	0.267765	0.348214	1.13022	1.13456	0.454279	0.266965	2.66272	1.09548	1.07426	2.75402	2.09685	1.2557	2.45359	1.08006	0.414219	0.382854
ANKRA2	0.784373	0	0.884553	2.01871	4.13317	3.95769	7.89074	2.92716	9.39739	4.26032	10.9004	8.79983	14.3209	2.40907	8.03351	8.7424
ANKRD1	0.467263	0	4.37258	0	0.069787	0	0	0	0.077282	0	0.023809	0	0	0	0.033089	0
ANKRD10	0.186934	4.33034	5.09579	0.311897	0.606535	0.565117	2.78479	0.533474	1.56173	1.34451	1.65266	1.22207	16.7654	0.636138	0.783808	0.705042
ANKRD11	0.641089	1.92993	3.0819	0.665155	2.57952	1.39168	10.7765	1.89611	14.6408	2.17938	11.772	6.51441	27.0365	2.71476	13.4882	17.0381
ANKRD12	0	0	0	0.922165	0.556492	0.592292	0	1.84586	0.445613	0	1.48237	0.428477	3.77586	0	0	0
ANKRD13A	0.750944	2.23899	3.38951	2.13076	2.34039	2.32977	7.82223	4.10001	3.7863	5.68884	9.16533	7.63517	16.1176	2.8313	2.04885	1.67503
ANKRD13B	0	0	0	0	0	0	0	0	0	0	0	0	0	0	0	0
ANKRD13C	0.221658	0.51362	0.947802	1.4071	2.38361	2.15386	4.66999	2.34683	2.66175	3.70371	4.89501	4.52003	5.37607	2.10301	2.38836	2.65126
ANKRD13D	1.91559	39.2329	31.456	0	0.009517	0.047774	1.65765	0.27641	0.296914	0.452404	0.234333	0.109241	9.51559	0.53475	0.054217	0.246239
ANKRD16	0.482688	0.684897	0.997631	0.252677	0.057423	0.060138	0.19664	0.289578	0.227035	0.760245	0.339642	0.1945	0.359379	0.178888	0.081898	0.105629
ANKRD17	0.341268	0.774137	1.95812	1.20724	1.65067	1.25118	6.00234	2.47647	3.02386	4.26671	5.37266	4.11257	6.20433	1.90408	2.05196	2.31785
ANKRD18A	0	0.453754	0.09324	0	0.026839	0.011246	1.01249	0.021656	0.324004	0.079862	1.14637	0.352641	4.52768	0.022195	0.114867	0.161247
ANKRD18B	0	0.322053	0.098177	0.351428	0.689219	0.60813	6.18485	1.02674	5.21237	2.44156	10.8097	6.98433	85.6552	0.897194	3.41957	3.99427
ANKRD2	0	0	0	0	0	0.0125	0	0	0.049721	0	0	0	0.171797	0.024735	0	0.055234
ANKRD20A1	0	0	0	0	0.005034	0	0.105675	0	0.060264	0	0.136277	0.125552	0.362167	0	0.041376	0.197969
ANKRD20A2P	0	0	0	0	0	0	0	0	0	0	0	0.111409	0	0	0	0.226352
ANKRD20A3P	0	0	0	0	0	0	0.155559	0.040431	0.033732	0	0.039934	0	0	0	0	0
ANKRD20A4P	0	0	0	0.027995	0	0	0.058411	0.105619	0	0.119031	0.028656	0.023312	2.71708	0.111836	0.022787	0
ANKRD22	0.099682	0.707563	0.123233	0	0.00986	0	0	0	0.017431	0	0	0	0.355303	0	0.014082	0
ANKRD23	0	1.36661	0.317739	0	0	0	0.312162	0.012333	0	0	0	0	0	0	0.050769	0
ANKRD24	0.207274	1.54002	0.732433	0.028823	0.018839	0.023712	0.261674	0.106418	1.08265	0.056119	0.310933	0.193602	1.47857	0.116913	0.475971	0.575105
ANKRD26	0	0	0.303081	0	0.035923	0.029581	0.312129	0.173637	0.117931	0.210403	0.071576	0	1.43985	0.176751	0.100727	0.131212
ANKRD27	1.06062	2.45903	1.94654	2.549	11.8457	8.64181	25.9462	6.42422	22.4059	6.59535	23.0906	18.2595	35.8661	5.34464	18.2289	21.611
ANKRD28	0.852228	1.16442	2.36654	0.434465	0.116001	0.031154	0.450414	0.542613	0.247146	1.04974	0.253532	0.212872	2.53418	0.338182	0.138831	0.140173
ANKRD29	0	0	0.447603	0	0.005675	0	0	0	0	0	0	0	0	0	0	0
ANKRD30A	0	0	0	0	0	0	0	0	0	0	0	0	0	0	0	0.027569
ANKRD30B	0	0	0	0	0	0	0	0	0	0	0	0	0	0	0	0.016057
ANKRD30BL	0	0	0	0	0	0	0	0	0	0	0	0	0	0	0	0
ANKRD31	0	0	0	0	0	0	0	0	0	0	0	0	0	0	0	0
ANKRD33	0.40842	0	0	0.101857	0.34881	0.355444	5.29297	0.385442	1.01971	0.594565	0.72686	0.232604	5.83878	0.462625	0.448911	0.602998
ANKRD33B	0.08981	0.463575	0.173854	0.046495	0.075974	0.047894	0.203033	0.107305	0.431138	0.123468	0.432414	0.428534	0.40354	0.056624	0.138592	0.277933
ANKRD34A	0.214275	0.253473	0.147241	0	0.079514	0.008893	0.365039	0.076996	0.088327	0.052618	0.065573	0.043565	0.504981	0.026313	0.06055	0.303952
ANKRD34B	0	0	0	0	0.02045	0	0.011359	0	0	0	0.021085	0	0	0	0	0.056744
ANKRD34C	0.068421	0.161945	0	0	0	0	0	0	0	0	0	0	0	0	0.00483	0.018765
ANKRD35	0.274114	0.748129	0.208923	0	0.018797	0.010505	0.097359	0	0.010435	0	0.012903	0	0.232609	0	0.008941	0.162183
ANKRD36	0.104914	0.444073	0.453112	0.033012	0.028245	0.009491	0.275	0.029701	0.04657	0.007786	0.075139	0.037194	0.421211	0.102294	0.068662	0.217842
ANKRD36B	0	0	0	0	0	0	0	0	0.008939	0.050828	0	0	0.299015	0	0	0.029636
ANKRD36C	0	4.40207	0	0	0	0	0.199928	0	0	0	0	0	0	0	0.064607	0
ANKRD37	0	0	0.595301	0	0	0.065021	0.382644	1.20438	1.44592	1.30762	0.641207	1.08984	0	0.333917	0.099022	0.974314
ANKRD39	0	0.440113	1.9891	0.764192	0.130919	0.281355	1.77827	2.4528	0.840044	4.19416	1.14843	1.35333	2.45547	0.964417	0.252971	0.373682
ANKRD40	0.443891	1.91965	2.14997	1.18789	0.821855	0.560975	4.38003	2.52115	2.84655	4.62569	5.10078	4.31902	8.53521	2.02895	1.61619	1.38379
ANKRD40CL	0	0	0	0.096483	0	0	0	0	0	0	0	0	0	0	0	0
ANKRD42	0	0.25488	0.30714	0.097939	0.174556	0.175642	0.413451	0.244145	0.465253	0.427273	0.875192	0.516299	0.702489	0.192519	0.431874	0.451921
ANKRD44	0	0	0.544499	0	0	0	0.124176	0	0	0.013876	0	0	0.04865	0.023141	0	0
ANKRD45	0	0	0	0	0	0.012398	0.05503	0.035824	0.061588	0.146739	0.178396	0.449506	0.329198	0	0	0.068378
ANKRD46	0.292325	0.986411	1.21722	0.038248	0.012484	0.010426	0.193108	0.120847	0.082918	0.172815	0.153187	0.040875	0	0.061844	0.035498	0.299305
ANKRD49	2.97738	2.61173	1.48327	1.16495	1.0832	1.36288	1.2963	1.84352	2.13611	2.01713	4.00668	2.93902	5.66987	0.63628	0	1.24655
ANKRD50	0.147236	0.124499	0.920917	0.044422	0.010374	0.010463	0.184801	0.056934	0.048478	0.288841	0.10304	0.034166	0.300264	0.024053	0.002968	0.019214
ANKRD52	0.213256	0.974825	3.0113	1.18069	0.533799	0.300381	12.3014	3.48054	2.29791	5.27973	4.30173	2.97617	6.99061	2.50497	0.881771	1.11044
ANKRD53	0.27887	0.294586	0.025689	0.042413	1.15425	0.737776	1.36626	0.104297	0.583553	0.018292	0.37906	0.545188	0.853446	0.198398	0.920743	1.07708
ANKRD54	0.228477	3.04718	2.17244	1.80297	0.655272	0.316498	2.89339	2.20331	1.26227	4.70373	1.9055	1.98421	4.45176	1.88583	0.689831	0.797418
ANKRD55	0	0	0	0.086096	0	0	0.213755	0.012966	0.01337	0.06371	0.016514	0	0.390539	0.026569	0	0.014845
ANKRD6	0	0.124732	0.292195	0.03185	0.086759	0.017485	0.131232	0.072817	0.243229	0.103446	0.365654	0.194145	3.19355	0.057451	0.116794	0.122054
ANKRD60	0.228443	0	0	0	0	0	0	0	0	0	0	0	0	0	0	0.084453
ANKRD61	0	0	0.128246	0.023491	1.90072	1.06068	6.9629	0.494514	3.63451	0.121059	4.59331	2.83098	4.77584	1.28978	1.65342	1.8635
ANKRD62	0	0	0	0	0	0	0	0	0	0	0	0	0	0	0.011319	0.036648
ANKRD63	0.526133	0.207522	0.066626	0	0.011999	0	0	0	0.013338	0	0	0.013159	0.093107	0	0.017146	0.140644
ANKRD65	0	0.039939	0	0	0.020162	0	0.089259	0.016265	0	0	0.041343	0	0.027123	0	0.043058	0.167483
ANKRD66	0	0	0	0	0	0	0	0	0	0	0	0	0	0	0	0
ANKRD7	0	0	0	0.057218	0	0	0	0	0	0.07259	0.148058	0	0	0	0	0
ANKRD9	0.380683	1.23087	1.15204	24.9821	58.9829	50.0839	70.4944	33.3473	71.2872	21.4775	64.3724	49.2991	89.9472	40.1425	73.3376	87.5099
ANKS1A	0.451968	1.33735	1.17091	0.235893	0.488586	0.309395	1.84558	0.511971	1.33753	0.937108	1.71481	1.30278	2.78158	0.539641	0.871698	1.13943
ANKS1B	0.269816	1.16331	0.167125	0.148095	0	0	0	0	0	0.033221	0	0	1.04104	0	0	0.070793
ANKS3	0	0	3.23874	0	0	0.198	0.921887	0.229152	1.21735	0.140241	0.218057	0.541063	0.690954	0.112643	0.20502	0
ANKS4B	0.058866	0.278597	0.060597	0	0.00873	0	0.058216	0	0	0	0.018017	0.014356	0.06093	0	0.012471	0.072689
ANKS6	0	0	1.00488	0	0	0	0	0	0.014693	0.052506	0.036276	0	0	0	0	0.016314
ANKUB1	0	0	0	0	0	0	0	0	0	0	0	0	0	0	0	0
ANKZF1	1.38241	0	1.45615	0.444612	3.6917	2.18656	7.83562	1.77304	3.05477	3.28099	4.54153	5.07325	4.88096	2.17037	6.174	3.06366
ANLN	0.298947	0.996896	2.55826	4.35847	1.19694	1.32201	7.20165	5.19904	0.450073	9.99698	4.12463	3.26153	3.83298	5.21616	0.841996	1.05102
ANO1	0	0.562406	0	0	0	0	0.02611	0.018952	0.019579	0	0	0.012877	0	0.019436	0.005593	0.007244
ANO10	0.103178	0.317277	2.24867	2.36429	1.07905	0.693895	9.91973	6.51043	11.192	7.09274	14.6486	13.7492	11.8097	4.70587	2.36239	2.34662
ANO2	0	0	0.085895	0	0.005154	0	0.022902	0.016637	0	0	0	0	0	0	0	0.047671
ANO3	0	0	0	0	0	0	0	0	0	0	0	0	0	0	0	0
ANO4	0	0	0.055719	0	0	0	0	0	0.008358	0	0	0	0	0	0	0
ANO5	0.120072	0.174917	0.136607	0.008366	0	0	0.036523	0.070634	0	0.212058	0.033932	0.022511	0.405965	0.054345	0	0.040515
ANO6	0.253691	0.621626	2.19676	0	0	0	0.370455	0.147602	0.008964	0.341756	0	0	0.324966	0.044507	0.007681	0.0479
ANO7	0.355502	1.04237	0	0	0.009171	0.003848	0.122295	0	0	0.045533	0	0	0.010665	0.007589	0.01965	0
ANO8	0.152598	1.33534	0.93016	0.041552	0.022633	0	0.130798	0.014612	0.165212	0.071923	0.102749	0	0	0.031212	0	0.15265
ANO9	0	0	0	0.010423	0.013621	0	0.030224	0.01099	0.01134	0	0	0	0	0	0.019436	0.045592
ANOS1	0.019929	0	0.147418	0	0.301028	0.228069	0	0	0.083695	0	0.427056	0.456598	0.068801	0	0.24053	0.19671
ANP32A	6.84398	2.26725	11.302	16.8349	1.26271	1.65336	12.426	16.8698	5.87676	32.477	14.6767	14.4658	23.3035	12.4205	3.95754	4.02197
ANP32B	18.0462	30.3182	26.3652	343.825	175.252	158.51	286.311	350.054	301.494	374.437	386.76	342.283	277.07	318.536	294.768	307.813
ANP32D	0	0	0	0	0	0	0	0	0	0	0	0	0	0	0.062887	0
ANP32E	0.94939	1.86415	4.51138	34.012	5.75712	6.03853	18.7089	30.2213	6.51007	49.167	18.4189	15.6882	18.4904	25.9065	4.89407	5.69383
ANPEP	10.2934	43.7943	39.0915	0.583265	0.009902	0.016615	2.52524	0.63923	0.218642	0.29492	0.245071	0.187207	17.4525	0.620919	0.126212	0.311403
ANTKMT	1.61492	1.35024	3.36763	1.89621	0.276821	0.104828	3.74631	3.46256	4.51535	3.90185	5.00845	3.48785	9.54387	2.2878	1.59699	1.09997
ANTXR1	0	0	11.7517	0	0	0	0.049311	0	0.026406	0	0.006543	0	0	0	0.009053	0.041031
ANTXR2	0.205978	0.503922	2.09352	0.016603	0.004343	0	0.159539	0.028206	0.010871	0.034544	0.035108	0.033043	0.486478	0.018605	0	0.060321
ANTXRL	0	0	0	0	0	0	0	0	0	0	0	0	0	0	0	0
ANXA1	11.2578	2.05701	28.6481	0.871375	1.49654	1.61965	5.41627	1.00691	33.6203	1.14432	15.5405	18.1738	8.62145	0.646837	6.43066	6.20241
ANXA10	0	0	0	0	0	0	0	0	0	0	0	0	0	0	0	0
ANXA11	1.66382	1.46319	3.78422	0.34102	0.024635	0	0.651832	0.379953	0.107278	0.933029	0.011319	0.022528	1.33003	0.285534	0.035228	0.045614
ANXA13	0	0	0	0	0	0	0	0	0	0	0	0	0	0	0	0
ANXA2	5.97163	8.6915	97.6239	1.63713	0.517065	0.491503	5.36701	2.76085	7.70318	8.16262	7.50819	6.46662	41.8003	1.44113	0.848625	1.2617
ANXA2R	0.211539	1.89307	0.525977	0.1792	0.378159	0.226057	0.757967	0.145283	0.778726	0.552996	1.57125	0.915646	4.43274	0.38693	0.987705	1.03096
ANXA3	0	0	0.277796	0	0	0	0.475221	0	0	0.098218	0	0	0.758938	0	0	0
ANXA4	2.47334	0.400224	3.49775	0.196953	0.135748	0.168593	3.4918	1.35776	2.39231	3.35578	2.69691	2.61564	19.8573	0.352763	0.609487	0.349547
ANXA5	6.13524	0	43.5484	5.98609	5.00311	4.68613	28.9336	9.33665	37.239	7.68964	34.6884	29.7138	81.2155	7.70169	16.2285	14.7564
ANXA6	2.4988	0.355142	16.3856	0.103355	0.060174	0.101872	1.8882	0.130779	0.044979	0.25453	0.236305	0.166369	0.78295	0.209568	0.028902	0.149806
ANXA7	3.49932	2.10073	8.37362	30.6467	26.9969	24.0828	48.3316	48.6693	40.1653	61.0084	73.4691	67.6559	37.0297	34.868	28.6764	28.9183
ANXA8	0	0	0	0	0.041579	0	0	0	0	0	0	0.017036	0	0	0.029593	0.09593
ANXA8L1	0	0.036831	0.129191	0.014219	0	0	0	0	0.015445	0	0	0	0	0	0	0.0343
ANXA9	0	0.653119	0.769172	0.105708	0.041396	0.115145	0.517841	0.155818	0.091587	0.081801	0.084531	0.11286	0.66527	0.045552	0	0.025433
AOAH	0.589711	0	1.01676	0.102399	0	0	0.055597	0	0	0.016572	0	0	0	0.027646	0	0
AOC1	0.394794	0.122875	0	0	0	0	0.054822	0	0.010283	0.012251	0	0	0	0.030638	0.017621	0.148398
AOC2	0.222313	1.08065	0	0.078724	0.264518	0.141576	1.27121	0.177857	1.10079	0.480833	1.01261	0.566981	2.67261	0.218709	0.932578	1.33077
AOC3	0.098534	0.528522	0.067669	0.007456	0.174736	0.036798	0.85445	0.04719	0.601014	0.164505	0.412129	0.272409	2.5152	0.096771	0.584631	1.11658
AOPEP	0	0.393881	0.653015	0.094641	0.043292	0.082955	0.33964	0.329362	0.31932	0.404972	0.571553	0.345454	1.69351	0.235299	0.132386	0.194088
AOX1	0	0	0	0	0	0	0	0	0	0	0	0	0	0	0.005428	0.00703
AP000295.9	0	0	0	0.036798	0	0	0	0	0	0.176614	0	0	0	0	0	0
AP000304.12	0	0	0.775098	0.321208	0.028246	0	0.214143	0.684369	0.14547	0.970309	0.11806	0.310759	0.126684	0.406101	0.07763	0.106916
AP000350.10	0	0	0	0	0	0	0	0	0	0	0	0	0	0	0	0
AP000471.4	0	0	0	0	0.688006	0	0	0	2.40842	2.9246	0	1.13555	3.26064	1.29654	0	0
AP000721.4	0	5.85724	0	0.105815	0	0	0	0	0	0	0.122544	0	0	0	0	0.331095
AP003419.11	6.85497	24.2221	23.7499	33.7937	23.3642	19.6481	46.6045	44.7919	48.6192	34.8994	61.5942	54.879	119.299	37.1284	34.3287	35.1423
AP1AR	0.51842	0.087651	0.420037	0.180174	0.081489	0.052968	0.570401	0.286225	0.760871	0.766916	1.24553	0.83754	2.26445	0.207563	0.25093	0.235425
AP1B1	2.32918	3.40615	4.75579	11.5969	3.07587	2.38797	25.3432	19.1547	6.23619	29.1529	12.8996	10.9086	11.1516	15.4869	3.38479	3.19248
AP1G1	0.41857	1.22848	3.25057	2.14591	4.4109	2.77598	9.93255	4.81198	5.3894	9.34431	8.18371	6.26319	16.9393	4.35018	4.48581	5.83885
AP1G2	0.443272	6.75033	3.2799	0.649229	0.354667	0.279434	3.91774	1.20458	0.639878	2.36088	1.82031	1.11016	17.0358	0.920633	0.589102	0.913565
AP1M1	0	3.47831	2.32988	1.2645	0	0.119493	11.3275	3.72236	1.3924	8.38691	3.9052	3.70839	0.168121	4.15957	0	0.690231
AP1M2	0	0	0	0	0	0	0	0	0.103915	0	0	0.102072	0	0	0	0
AP1S1	2.53798	6.74199	11.9257	4.25079	0.554459	0.527583	5.16551	4.73945	2.11126	10.1636	3.4164	3.16613	13.1103	2.43723	0.628371	0.835546
AP1S2	1.14935	0.867818	2.48415	0.393433	0.053764	0.047774	0.678233	0.262555	0.484099	0.653105	0.371027	0.243492	2.06625	0.157279	0.166951	0.14058
AP1S3	0	0	0.035156	0	0	0	0	0	0.039075	0	0.030886	0.038527	0	0.038853	0	0
AP2A1	3.18742	4.67246	7.95935	27.0553	17.4064	14.2608	73.3962	40.3345	29.9211	48.1181	61.2686	57.0397	31.6281	38.4571	16.9404	20.7172
AP2A2	0.489741	3.52529	1.63929	1.93538	0.879778	0.705569	2.99375	2.56512	2.20003	2.15978	2.57088	1.8511	4.68609	2.4677	1.33549	1.95175
AP2B1	1.59245	0	4.78705	6.35444	6.93219	4.99667	47.5512	20.596	5.86579	38.8597	29.7853	27.2049	6.87034	14.9486	3.07605	3.32015
AP2M1	11.3339	14.5871	36.0709	61.5529	45.8253	45.8218	161.623	119.142	83.6702	207.443	172.224	162.861	72.389	97.4176	37.1229	39.4331
AP2S1	8.93509	13.9248	25.6614	76.9926	23.7118	21.7857	45.6071	63.1656	39.8169	89.6529	56.4816	59.0603	50.4538	61.0175	29.3912	29.4621
AP3B1	0.738037	0.835194	2.98775	2.49816	0.352276	0.223683	2.87753	3.10397	0.793436	6.86324	2.36677	2.13682	3.42045	2.07191	0.278773	0.440364
AP3B2	0	0.814593	0	0	0	0	0	0	0	0	0	0	0	0	0	0
AP3D1	0.908155	4.67214	10.4939	5.22164	6.55468	4.54081	30.4789	13.1164	21.8488	17.6795	23.31	20.3138	32.9326	10.3194	16.3639	19.6573
AP3M1	1.32849	0.801718	1.85949	1.16279	0.287437	0.276798	2.85264	1.92327	0.795422	4.6175	1.9275	1.38769	2.68682	1.53795	0.427223	0.305224
AP3M2	0.245452	0.269621	0.849336	0.204045	0.07286	0.048021	2.00406	0.818064	0.801372	1.42779	1.39045	1.00526	1.08751	0.68029	0.156055	0.192531
AP3S1	3.15715	3.34423	8.77631	11.0675	2.38834	2.58652	8.54211	12.8332	12.6777	20.8517	15.413	12.8118	25.0298	7.87741	5.22736	4.91111
AP3S2	0.149447	0.656657	0.584078	1.01295	0.56788	0.53946	4.29605	2.94195	2.69777	3.46434	4.53585	4.1279	4.50402	2.40658	1.57028	1.77183
AP4B1	0.549179	4.44579	2.08361	2.07107	0.562454	0.358445	5.0003	4.12305	1.14629	8.71485	4.45734	3.45611	11.762	3.39509	0.766667	0.579378
AP4E1	0.396916	0	0.576428	1.40048	0.639608	0.394962	2.17787	1.65447	0.82541	3.50494	2.37376	1.87624	2.93848	1.28991	0.500325	0.607346
AP4M1	0	1.26135	0.916655	1.21835	0.043031	0.107223	3.93848	1.23725	0.612338	2.78451	1.26743	1.28804	3.65525	1.88466	0.121697	0.395299
AP4S1	0	0	0	1.80558	0.626972	1.00432	0.83637	1.4051	0.7119	1.85296	1.15923	2.0738	3.61468	0.867116	0.82459	1.09129
AP5B1	0.765872	0.706248	1.54377	0.875129	0.400801	0.3611	5.34082	1.33643	2.3933	2.19657	3.29896	2.29624	4.60013	0.951851	0.810761	0.966773
AP5M1	0	0	0	0.596615	0.312997	0.258483	1.33749	0.756591	0	1.17611	1.36724	1.41686	1.44026	0.383325	0	0
AP5S1	0.981823	0.372885	0.90274	1.8905	0.156933	0.244946	1.64384	1.74331	0.539054	4.43229	1.37244	1.2517	2.17192	1.90139	0.491441	0.521376
AP5Z1	0.545853	2.96187	1.43538	0.902991	9.12213	5.49279	22.8023	2.66024	16.9207	3.60736	14.7437	10.5045	33.219	3.97396	18.6834	23.8588
APAF1	0.600176	0.26925	1.06764	0.140193	0.091416	0.038607	0.676192	0.321398	0.238021	0.437763	0.378516	0.238402	0.571441	0.333949	0.113179	0.202529
APBA1	0.264403	0	0.162955	0	0	0	0.006223	0.009027	0.004665	0	0.023127	0.013809	0	0.018521	0.019994	0.036245
APBA2	0.145299	0.586994	0.56603	0.075502	0	0	0.050002	0.129387	0	0.254094	0	0	0	0.040808	0	0.100972
APBA3	0	0	0.877572	0.965897	3.41826	2.31339	7.81742	3.39691	12.403	4.53942	12.4454	9.61052	10.3005	2.67451	8.8336	9.85955
APBB1	0	0	0	0.026115	0	0	0	0.10414	0.069932	0	0	0	0	0.054865	0	0.163035
APBB1IP	1.50947	1.16007	2.35124	0.526965	0.007484	0	0.248988	0.132855	0.024916	0.222611	0	0	0.624111	0.44554	0	0.029414
APBB2	0.076223	0.098436	1.39364	0	0	0	0.027396	0.024603	0.006844	0.008658	0.01273	0.006753	0.090943	0	0	0.026586
APBB3	0	2.79673	0	0.290961	0.49228	0.085875	2.3196	0.50122	2.4417	0.903659	1.91789	1.09739	5.50893	0.615773	0.622652	1.2285
APC	0	0	0	0	0.069195	0.223497	1.61428	0.111255	0.233737	0.530651	1.06409	0.329209	0	0.449586	0.66599	0.249275
APC2	0	0	0	0	0	0	0	0	0	0	0	0	0	0	0	0
APCDD1	0	0.299378	0.389368	0	0	0	0	0	0.025141	0	0	0	0	0	0	0.092623
APCDD1L	0.164811	0.272971	1.64349	0	0.009781	0	0.010868	0	0.048905	0	0	0.016081	0.090961	0	0.015469	0.12402
APCS	0	0	0	0	0	0	0	0	0	0	0	0	0	0	0.037989	0
APEH	2.19245	0	5.74525	10.6358	6.07247	4.8302	24.8498	21.4026	9.27471	42.5783	20.0208	20.3263	10.949	15.6344	5.28238	8.00547
APELA	0	0	0	0	0	0	0	0	0	0	0	0	0	0	0	0
APEX1	12.2182	10.3774	24.7427	18.0285	7.49331	6.56267	40.8282	25.9371	30.764	45.3807	38.4247	32.6284	31.0645	18.2895	19.3137	16.7085
APEX2	0.360997	1.2572	1.90354	8.64279	1.63834	1.57847	14.3071	13.0209	3.02156	24.209	10.3957	8.6827	19.9374	11.1161	1.50504	1.6635
APH1A	4.27086	1.44743	8.65524	4.53241	0.832562	1.21492	9.7655	7.16494	4.80464	12.8294	9.87844	8.67699	9.38324	4.02349	1.60347	2.10445
APH1B	0	0	0	0	0	0	0	0	0.25909	0	0	0	0	0.237097	0	0
API5	0	0	0	0.65547	1.15264	1.08307	15.4052	4.78234	0.688713	7.8296	7.17583	5.19448	0	2.86498	0.167653	0.986939
APIP	0	0	2.52726	3.91375	0.361997	0.691476	3.46288	4.34613	3.05771	7.31662	3.46482	3.5643	8.92905	3.07274	0.922844	1.15444
APLF	0	0	0.248897	0.297083	0.312256	0.207394	0.589141	0.271809	0.638893	0.177945	0.633871	0.381348	1.3078	0.156536	0.327279	0.457518
APLN	0	0	0.249551	0.009163	0	0	0	0	0	0	0	0	0	0	0	0.044289
APLNR	0	0	0	3.33292	0.169528	0.158942	0.736558	0.51832	1.08401	0.683624	0.499474	0.464965	0	0.671759	0.393888	0.645394
APLP1	0	0	1.08981	0	0	0	0	0	0.014737	0	0	0	0	0	0	0.072323
APLP2	6.87165	7.24432	29.94	38.2187	14.0243	11.8497	61.1452	54.4112	27.2032	69.3961	60.459	49.3831	77.9521	45.4168	19.3357	22.16
APMAP	2.92244	5.35139	9.96257	4.48548	1.79985	1.3616	9.41284	4.94318	13.5311	10.9409	11.1374	9.77996	20.629	4.42996	5.76742	6.25755
APOA1	0	0	0.442903	0	0.342558	0.349168	0.230554	0.084958	0.260741	0	0	0	1.60514	0.086674	0.594466	0.72474
APOA2	0	0	0	0	0	0	0	0	0	0	0	0	0	0	0	0
APOA4	0	0	0	0	0.014717	0	0	0	0	0	0	0	0	0	0	0.135573
APOA5	0	0	0	0	0.010975	0	0	0	0	0	0	0	0	0	0.046851	0.182268
APOB	0.112332	0	0.007086	0	0	0	0	0	0	0	0	0	0	0	0.003657	0
APOBEC1	0	0	0	0	0	0	0	0	0	0	0	0	0	0	0	0
APOBEC2	0	0	0.072271	3.25844	1.76384	1.58089	1.71889	2.25968	1.29177	2.23068	2.25321	1.74049	0.685639	2.99771	1.78803	1.60216
APOBEC3A	0	0.518887	0.203967	4.46397	0.760832	0.634572	2.51784	1.60478	0.461105	1.7408	0.710527	1.37516	1.3421	2.32443	0.307817	0.512215
APOBEC3B	0	0	1.41971	5.7394	0.2239	0.398149	3.20947	3.70339	0.154404	11.1952	1.42375	1.22275	0.570055	3.45492	0.368916	0
APOBEC3C	3.40573	4.79664	2.81667	13.372	1.00572	1.04842	19.069	17.1608	3.58367	39.8193	12.1462	10.5749	22.5376	12.4544	1.79251	1.49241
APOBEC3D	0.84107	1.57348	0.17462	0.312966	0.10456	0.034972	1.00023	0.208304	0.147173	0.282812	0.357722	0.275924	0.08245	0.251089	0.193484	0.116187
APOBEC3F	1.47757	0	0.144022	0.784471	0.050899	0.373895	1.38723	0.327754	0.248826	1.18284	1.17022	0.503852	3.44342	1.0806	0.212202	0.277147
APOBEC3G	0.045641	0.538893	0.190353	1.7999	0.232222	0.057	3.74595	3.59196	0.408032	8.88106	3.34982	1.98352	9.28484	2.43407	0.242624	0.453227
APOBEC3H	0	0	1.23944	0.590174	0.054672	0.044524	0.234333	0.439948	0.533557	1.6905	1.49437	1.66077	6.29177	0.089186	0.151619	0.29722
APOBEC4	0	0	0	0	0	0	0	0	0	0	0	0	0	0	0	0
APOBR	1.28617	6.30645	5.76114	0.215169	0.010045	0.008427	0.725366	0.226968	0.159033	0.169534	0.031075	0.024771	3.2105	0.232711	0.064553	0.250862
APOC1	0	0	0.474446	40.9203	0.546905	0.10355	8.4303	14.9747	1.99661	17.3525	2.33136	2.64162	18.209	14.7375	0.705209	0.766366
APOC2	0	0	0	0	0	0	0	0	0	0	0	0	0	0	0	0
APOC3	0	0	0	0	0	0	0	0	0	0	0	0	0	0	0	0
APOC4	0	0	1.00815	0	0	0	0	0	0	0	0	0	0	0.166246	0	0
APOC4-APOC2	0	0	0	0.181221	0	0	0	0	0	0	0	0	1.99541	0.140729	0	0
APOD	0	0	0	0	0	0	0	0	0	0	0	0	0	0	0.041947	0.109169
APOE	1.60298	1.0138	24.1254	143.395	0.717477	0.310619	9.50258	21.3535	10.6518	13.6992	2.62811	1.88929	129.76	45.6831	3.27883	4.47932
APOF	0.159911	1.46383	0	0	0.107507	0.019958	0	0	0.019839	0	0.073329	0	0	0.019727	0.050964	0.066101
APOH	0	0	0	0	0	0	0	0	0	0	0	0	0	0	0	0
APOL1	0	1.12315	3.06409	1.47123	0.98821	0.619725	33.7023	8.49444	7.80202	19.4993	17.9844	14.075	75.4474	5.30358	3.94165	4.21278
APOL2	1.87096	2.37442	2.82454	2.06891	2.33447	1.59118	35.6787	10.3758	15.5374	23.071	22.9425	18.8991	102.259	6.28345	9.3052	9.82113
APOL3	0.353262	0.379532	0	0.990633	5.69327	4.65775	3.36409	0.895501	8.81123	1.63895	9.9498	10.2653	34.4079	3.42435	19.0746	24.5722
APOL4	0.191388	0.075449	0	4.31298	0.360114	0.377966	7.53395	7.12711	0.412211	16.334	5.97203	5.79219	5.4541	5.66521	0.199127	0.325281
APOL5	0	0	0.126591	0	0	0	0	0	0	0	0.030853	0.049469	0	0	0	0
APOL6	0.268667	0.61445	0.556199	0.450289	0.446202	0.355324	8.33629	3.69455	1.80011	4.67831	11.5953	9.02973	25.4022	2.32481	0.672038	0.699418
APOLD1	0.147368	0.364612	0.055116	0.091142	0.428015	0.247795	0.786049	0.205117	0.502865	0.362989	0.954899	0.542292	0.748947	0.373471	0.306543	0.534832
APOM	0	0	0.379361	3.36731	0.839359	0.986222	2.24936	4.01546	3.16923	5.20557	3.7044	2.7695	6.89586	3.02741	2.0225	2.33267
APOO	0	0	1.28929	1.90878	0.223092	0.968692	1.83902	1.6092	1.06099	2.72091	0.205724	0.346159	6.57189	1.61189	1.50002	0.79119
APOOL	0.307851	0.045546	0.521801	0.326822	0.116813	0.076587	0.95107	0.657613	0.232902	1.47824	1.28986	1.16301	1.56773	0.471608	0.069258	0.052753
APP	4.56224	1.60442	26.0256	1.25158	0.158745	0.209869	3.98515	3.51772	1.67797	5.76709	3.63573	2.61532	4.70566	1.4746	0.392108	0.451581
APPBP2	0.336064	0.784165	1.08104	0.561049	1.07118	0.979337	2.01483	1.09714	2.25315	1.41539	3.48097	2.56451	4.11071	0.829286	1.61735	1.42598
APPL1	0.846349	0.43871	2.23528	0.097997	0.003051	0.012813	0.278337	0.172357	0.030536	0.563987	0.025225	0.030128	0.348468	0.090926	0.004367	0
APPL2	0	0.09709	2.81225	1.98192	4.26834	3.085	7.65235	3.10297	8.70861	2.87834	9.83813	9.37757	20.1738	3.59519	7.02105	6.94591
APRT	6.64098	7.46134	19.9475	21.0147	1.282	1.16668	27.4964	26.841	15.2161	60.8894	12.051	12.5726	15.204	16.754	6.33324	6.40245
APTX	0.060921	0.778304	0.308119	0.235966	0.126508	0.168327	0.751042	0.921914	1.31684	1.3289	1.55695	1.39649	1.68663	0.582254	0.717423	0.618083
AQP1	0	0	0.406906	14.6109	5.6769	4.987	11.9463	9.48214	1.84603	10.3376	10.7608	9.73104	5.29401	16.8759	2.29848	1.81181
AQP10	0.421747	0	0.255073	0	0	0	0.025321	0.036948	0	0.022656	0	0	0	0.056738	0.016289	0.26993
AQP11	0	0	0.503277	0	0	0	0.049969	0.05468	0.131381	0.022354	0.069401	0.09253	0	0.03732	0	0.087698
AQP12A	0	0	0	0	0	0	0	0	0	0	0	0	0	0	0	0
AQP12B	0	0	0	0	0	0	0	0	0	0	0	0	0	0	0	0.15661
AQP2	0.213529	0	0.11307	0	0	0	0	0.065719	0	0.035943	0	0	0	0	0	0.075342
AQP3	0	0.629666	0.886419	12.6338	17.1193	15.6134	90.3676	28.523	21.9739	67.0184	86.8442	79.422	19.6163	24.6797	17.1823	19.2104
AQP4	0	0	0	0	0	0	0	0	0	0	0	0	0	0	0	0
AQP5	0	0	0.125404	0	0	0	0	0	0.02486	0	0.03057	0	0	0	0	0.08285
AQP6	0	0	0	0	0	0	0	0	0	0	0	0	0	0	0	0
AQP7	0.182422	1.3213	0.094207	0.031125	0.054233	0.017043	0.095669	0.08752	0.180758	0.290506	1.33437	0.984016	0	0.056061	0.190707	0.441915
AQP8	0	0.413832	0	0	0	0	0.077337	0	0.029093	0	0	0	0	0	0	0.096973
AQP9	0	0	0	0	0	0	0	0	0	0	0	0	0.303853	0	0	0
AQR	0	0.333989	0.703757	0.450301	0.173995	0.150809	1.19884	0.767364	0.654283	1.41429	0.915897	0.650166	1.27592	0.588936	0.241374	0.139906
AR	0	0	0.244014	0	0	0	0	0	0	0	0	0	0	0	0	0
ARAF	0.338087	14.4876	7.55927	15.7448	8.52786	7.86632	39.469	27.4666	21.7038	34.5453	31.6077	29.251	76.1386	21.9677	15.6378	17.6204
ARAP1	1.51978	2.64133	2.00928	0.889103	0.955303	0.892855	7.87623	1.94736	1.59089	2.14784	3.35341	2.85914	5.04233	1.81269	1.39327	0.840642
ARAP2	0.231052	0.117213	0.169441	0.048568	0.195428	0.153944	0.331719	0.134064	0.142666	0.092287	0.793015	0.655554	2.36302	0.072815	0.1153	0.131191
ARAP3	0	0.636933	0.464011	0	0	0	0.061975	0	0.010601	0	0	0.012499	0.188935	0	0	0.06328
ARC	0.046639	1.31285	0.330141	0	0	0	0.497981	0	0.054949	0.039278	0	0.02168	0.382653	0	0.047079	0.146407
ARCN1	1.47967	1.79615	9.9237	3.65074	5.43004	4.1557	18.4623	10.9802	8.7722	16.9345	16.7109	16.6741	4.35278	7.36401	5.20544	5.41519
AREG	0	0	0.307069	0.056206	0.201617	0.366073	0.459031	0.295611	4.95261	0.61421	3.15826	2.27289	2.67617	0.302142	2.73434	2.85162
AREL1	0.461186	0.384378	1.54798	4.57388	2.91734	2.16563	10.6622	7.23277	6.47022	11.897	11.8073	9.32586	12.4855	5.91561	4.46572	4.97888
ARF1	16.559	18.0868	31.5204	121.649	149.272	138.41	275.487	219.564	375.853	210.908	413.001	362.173	252.511	208.712	319.82	359.143
ARF3	3.27536	5.05076	11.3596	0.98325	0.04222	0.013071	2.34573	1.31737	0.265844	4.05248	0.348416	0.254541	4.19208	1.08686	0.067005	0.230929
ARF4	3.38619	1.6177	15.8011	79.0407	80.2549	74.8043	113.491	114.09	169.864	108.05	181.87	159.816	125.684	92.8813	168.948	157.695
ARF5	0.630413	2.60999	4.48223	8.15284	4.43017	4.17419	19.6344	17.4808	12.6234	25.0101	23.4244	22.628	7.11193	12.614	5.51756	5.03548
ARF6	3.04257	4.71455	5.8736	25.5183	9.98084	9.21363	26.5393	27.0847	20.7802	39.8127	26.8617	25.1139	24.6978	21.3152	14.8009	16.7122
ARFGAP1	2.19215	26.6812	23.1084	3.60285	2.63215	2.11095	11.9108	6.58182	10.3173	10.1618	13.9008	9.41827	37.0093	7.24976	8.30787	10.5863
ARFGAP2	2.84616	13.1042	12.5759	14.3145	7.64684	5.57267	25.1886	19.5766	21.2746	32.4461	28.3327	22.4151	43.3374	20.1529	16.7271	18.9295
ARFGAP3	0.701593	0.829585	2.59254	2.29066	1.92116	1.70001	10.4388	4.46791	8.74285	6.16454	15.5281	11.7198	11.5882	3.01046	4.70003	4.22567
ARFGEF1	0.132517	0.02519	1.0276	0.188978	0.339931	0.352094	2.32498	0.82666	0.509591	1.43978	2.10575	2.06317	1.00361	0.429175	0.179809	0.305405
ARFGEF2	0	0	0.974846	0.954377	2.23777	1.42859	6.94944	1.58168	4.37164	3.53068	7.32728	6.20456	5.52667	1.94338	1.9536	3.20597
ARFGEF3	0.106657	0.446858	0.117726	0	0.003639	0	0.008108	0	0.002025	0	0	0	0	0	0.003472	0.038205
ARFIP1	0.604354	0.312753	1.68263	1.23575	0.987065	0.888923	2.86477	2.05459	2.68161	4.30809	5.40941	4.18441	5.8874	1.09489	1.75336	1.87737
ARFIP2	0	0.990402	0.754614	0.779941	0.777851	0.71556	3.53749	1.84483	3.70758	3.40708	3.74946	3.40372	6.05619	1.86242	2.32138	2.62836
ARFRP1	0.874785	0.463878	0.85122	2.74829	0.713993	0.890821	3.94039	3.12647	4.21581	4.2356	4.24399	4.46362	4.19547	3.0984	3.92427	3.86547
ARG1	0	0	0	0	0.349849	0	2.84152	0	0	0.47291	0	0	0	0	0	1.05977
ARG2	0.085445	0.675422	2.41492	44.1536	59.9104	56.1982	63.9472	73.3471	123.967	47.416	142.984	126.322	75.1927	72.2501	121.892	119.059
ARGFX	0.012495	0.14786	0.030841	0	0.014814	0	0.032947	0	0.024703	0	0	0.006093	0.068996	0	0.010586	0.054838
ARGLU1	0.197013	1.83989	0.543891	1.89439	0.45997	0.420767	1.28397	2.56924	0.513599	4.60703	1.69976	1.78231	4.10867	1.53662	0.434881	0.363832
ARHGAP1	1.98227	4.52693	5.62837	1.39446	0.598372	0.356116	5.86422	3.06022	4.68847	4.90967	4.07112	3.91542	10.9183	2.21007	2.15332	2.92277
ARHGAP10	0	0.305248	2.46866	0.072178	0	0	0.026184	0.076122	0	0.210624	0	0.009688	0.164255	0.136556	0.016831	0
ARHGAP11A	0.801091	0.462211	1.8068	4.0671	1.31058	1.26201	8.81494	6.51654	0.8965	14.8205	5.23141	4.49568	5.18818	5.23619	0.799594	0.694861
ARHGAP11B	0.299129	0	0.82183	0.322325	0.159647	0.12288	1.96703	0.740819	0.340046	1.37878	1.03777	0.857962	1.20557	1.00244	0.589191	0.548434
ARHGAP12	0.124611	0	1.1996	0.164223	0.692303	0.821775	0.878938	0.309987	0.860583	0.719205	1.28511	1.19531	1.37954	0.241563	0.484445	0.828699
ARHGAP15	0.090827	0	0	0	0	0	0	0	0	0	0	0	0	0	0	0.012119
ARHGAP17	1.47782	0.676358	3.04727	1.05746	2.88792	2.06069	5.67956	2.46877	17.6951	3.11391	13.3267	11.6987	5.82186	2.0043	11.4574	12.5886
ARHGAP18	1.094	1.54992	2.02685	1.07758	0.059766	0.07166	1.22426	1.22643	0.661872	2.12842	0.572756	0.428283	1.50989	0.763087	0.21347	0.292286
ARHGAP19	0.287179	0	0	0.570276	0	0.080099	2.16754	0.949122	0	1.56728	0	0	0	0.61814	0.181322	0
ARHGAP20	0	0	0.033181	0	0	0	0	0	0	0	0	0	0	0	0	0.049808
ARHGAP21	0.504503	0.764897	1.13404	0	0.346151	0.340492	3.08414	0.341163	0.949893	0.805736	2.94755	1.71732	2.68845	0.292645	0.146924	0.466866
ARHGAP22	0.758648	2.6895	4.37188	0.064428	0.039126	0	0.046551	0.068473	0	0.145752	0	0	0.528568	0.017378	0.142768	0.097065
ARHGAP23	0.1694	0.413506	2.6076	6.19808	1.18243	0.898275	5.6726	4.2751	3.91998	5.3844	3.06426	2.47962	2.44879	7.58187	3.12737	4.16659
ARHGAP24	0.233119	0.762622	0.496686	0.00622	0	0	0.00904	0.023982	0.027116	0	0	0	0.19874	0.00673	0	0.052672
ARHGAP25	1.01794	1.76907	0.67934	0.040265	0.013155	0.011026	0.277357	0.116763	0.010953	0.126974	0	0.032411	1.22887	0.054397	0.018769	0.03648
ARHGAP26	0.140214	0.584918	0.22137	0.054384	0.049392	0.018266	0.127588	0.01329	0.092328	0.031435	0.118571	0.055335	0.45661	0.026177	0.045225	0.087826
ARHGAP27	0	1.81634	0.72991	0	3.03916	1.72269	3.69751	0.201298	7.70051	0	3.63247	2.08546	6.43588	0.356648	6.5945	8.64762
ARHGAP28	0	0.265625	0.632662	0.004843	0	0	0	0.010221	0	0.012586	0	0	0	0.005242	0	0.017585
ARHGAP29	0	0	0.974762	0	0	0	0	0	0.006803	0	0.004217	0	0	0	0	0.00755
ARHGAP30	1.87495	3.30463	1.51335	0.033232	0.112956	0.036462	1.02741	0.049083	0.818395	0.112181	0.483628	0.242924	0.893979	0.186949	0.252107	0.366288
ARHGAP31	0.172046	0.08617	0.494253	0.050902	0.005874	0.003291	0.109006	0.022123	0.022875	0.027259	0.07699	0.009673	0.109704	0.0227	0.04482	0.068906
ARHGAP32	0.218793	0.525244	0.394665	0.032995	0.001798	0.001511	0.087207	0.029024	0.006002	0.114445	0.011165	0.032574	0.096567	0.038715	0	0
ARHGAP33	0.362452	1.59027	1.44293	0.375155	0.567412	0.315789	3.48747	0.354272	0.425605	0.527389	1.65474	1.185	5.43664	1.0135	0.479955	0.799379
ARHGAP35	0.563516	0.580778	2.67726	1.09796	2.34193	1.88005	5.31191	2.40017	2.65074	2.26288	3.05777	2.68242	2.94848	1.9396	1.84961	2.44729
ARHGAP36	0	0.311055	0	0	0.019544	0	0	0	0	0	0	0	0	0	0	0.012044
ARHGAP39	0	0.172958	0.858922	0.024586	0.016072	0.006746	0.017868	0.006485	0.194278	0	0.054345	0.059482	0.149643	0.013301	0.080379	0.394101
ARHGAP4	3.07437	22.0649	23.8316	0	0	0.127699	1.02965	0.155142	0.246462	0.39016	0.174735	0.235675	3.61676	0.191097	0.472257	0.130017
ARHGAP40	0.138824	0	0	0	0	0	0	0	0.022908	0	0	0.04519	0.031897	0	0.009813	0.050864
ARHGAP42	0	0	0.423275	0.425488	0.379809	0.272373	0.464576	0.289732	0.142281	0.450637	0.44202	0.395297	0.256559	0.438454	0.202198	0.257637
ARHGAP44	0	0	0	0.020298	0	0	0	0	0	0	0	0	0	0	0	0
ARHGAP45	3.62721	2.4473	5.37406	0.414882	0.855621	0.284112	4.17193	0.753208	2.06205	0.890081	1.60234	2.41553	6.28369	0.857166	2.46708	2.96485
ARHGAP5	0	0	0	0.693931	0	0	0.361143	0	0.365595	0	0.109608	0.988122	0	0	0	0.101838
ARHGAP6	0	0	0	0	0.015419	0.006457	0.315771	0.037372	0	0	0.079256	0.025309	0.0198	0	0.010992	0
ARHGAP8	0	0	0	0.438737	1.4711	0.466685	0.417233	0.810897	0.478941	0.700064	3.58449	1.82943	5.00531	1.06562	1.44361	1.42718
ARHGAP9	1.07198	2.67918	2.71323	0.054924	0.337093	0.155755	0.931212	0.04604	0.25926	0.091342	0.137827	0.088391	3.6943	0.179786	0.455627	0.773185
ARHGDIA	19.6518	47.8415	57.3774	18.2983	18.6739	15.9764	91.5219	48.5539	91.862	65.4365	76.752	63.2984	131.594	36.4694	54.9158	63.3189
ARHGDIB	56.6836	54.8943	46.0521	17.4873	0.938078	1.20361	17.6144	15.519	2.45771	21.3667	4.32102	3.09102	24.4363	11.8192	2.13044	2.19209
ARHGDIG	0	0	0	0.054786	0	0	0	0.172242	0	0.208742	0	0	1.03193	0	0	0
ARHGEF1	2.61292	10.6933	12.964	1.31735	0.090105	0.080747	4.62908	1.79085	0.998373	4.45131	2.13032	1.51602	14.0688	1.42349	0.307245	0.501393
ARHGEF10	0	0	0.672063	0	0	0	0.399946	0	0.210641	0.10461	0.189362	0.468798	2.07308	0	0.199334	0.603386
ARHGEF10L	0	0	0.732784	0	0	0	0	0	0.033865	0	0	0.013364	0	0.020171	0	0.040027
ARHGEF11	0.700977	1.22436	1.43176	0.015483	0	0	0.168156	0.053107	0.073941	0.045372	0.010469	0	0.643499	0.007546	0.025338	0.059731
ARHGEF12	0.139512	0.288707	2.0774	12.9016	36.775	27.9856	62.8658	25.884	30.2372	20.2159	45.1685	34.5689	33.4281	20.8613	26.9384	29.4866
ARHGEF15	0	0	0	0	0	0	0	0	0	0	0	0	0	0	0	0
ARHGEF16	0	0	0.288947	0	0	0	0.015377	0	0	0	0	0	0.064263	0	0.009886	0.051242
ARHGEF17	0.083313	0.531853	2.51252	0	0	0.001884	0.039928	0	0	0	0.004638	0.003691	0.120319	0.011137	0.006413	0.112096
ARHGEF18	0.866723	0.705976	1.48565	0.700682	0.576798	0.461373	4.39163	1.42546	1.77726	2.0684	3.30964	2.9937	4.07369	1.64967	0.816058	1.13057
ARHGEF19	0	0.56721	0.434743	0.274923	0.057957	0.046411	0.64349	0.135831	0.347573	0.138032	0.214958	0.114284	0.135806	0.252612	0.322637	0.407278
ARHGEF2	2.36321	3.44401	5.53736	7.92752	15.0371	11.0143	28.2266	9.95157	34.8465	10.0698	34.2511	29.0597	22.0483	8.89402	27.8246	31.4101
ARHGEF25	0	0	0.595281	0	0	0	0	0	0	0	0	0	0	0	0	0
ARHGEF26	0.311424	0.070873	0	0	0.006836	0	0.007896	0	0.011146	0	0	0	0	0	0	0
ARHGEF28	0.011997	0.369131	0.019738	0	0.007743	0	0	0.011477	0	0	0.029379	0	0	0.011772	0.005082	0.032906
ARHGEF3	0.902065	1.01997	1.48079	0.080337	0	0	0.215513	0.168826	0.184941	0.428573	0.230308	0.245233	1.5432	0.173756	0.026407	0.015615
ARHGEF33	0	0	0.011628	0	0	0	0	0	0.076807	0.00832	0.008646	0.034442	0	0.006932	0	0.007886
ARHGEF35	0.490875	0.397989	0.672482	0	0.037806	0	0	0	0	0.059969	0.015549	0	0.087561	0	0	0.088091
ARHGEF37	0	0	0	0	3.85023	2.53795	1.94881	0.7424	2.97373	1.61702	3.37684	3.28309	1.6242	1.49745	1.37031	1.52086
ARHGEF38	0	0	0	0	0	0	0	0	0	0	0	0	0	0	0	0
ARHGEF39	0.067411	1.97855	0.639052	0.648939	0.245603	0.162704	1.75041	0.973481	0.570978	1.92941	1.04442	0.792889	2.90016	0.871641	0.214572	0.279595
ARHGEF4	0	0	0	0	0	0	0	0	0	0	0	0	0	0	0	0.012812
ARHGEF40	0.465448	0	0.932362	0	0	0.009681	0.141611	0	0	0	0	0	0	0	0	0.085494
ARHGEF5	0	0	0	0	0	0	0	0	0	0	0	0	0	0	0	0
ARHGEF6	1.80586	1.08415	3.01631	0.596181	0.04724	0.033047	1.3218	0.775154	0.439781	1.24354	1.32497	1.062	1.96119	0.475679	0.056254	0.036428
ARHGEF7	0.145804	0.172515	0.564315	0.165386	0.346731	0.384143	1.9056	0.679322	0.731107	1.08944	1.38044	1.35985	0.955061	0.484754	0.589744	0.730058
ARHGEF9	0	0.459935	0.56829	0.089453	0.00688	0	0.114782	0.066628	0.057372	0.211923	0	0	0	0.051254	0.009834	0
ARID1A	1.07201	0.465985	1.82056	1.21776	3.7988	2.52554	26.4271	5.44077	8.87271	4.988	9.41047	6.73255	7.90192	5.57945	4.6919	6.82294
ARID1B	0.799982	0.695994	0.533784	0.942296	1.52342	1.10646	2.61732	1.34633	1.78511	1.73344	2.00531	1.79827	4.75636	1.0356	1.70375	1.92956
ARID2	0.430753	0.798878	0.636557	0.627098	1.18979	0.934755	4.2204	1.11801	1.5839	2.3239	3.34163	2.87751	3.7481	0.925408	1.00884	0.93237
ARID3A	0.620604	2.14125	1.4182	1.05329	1.53465	1.46793	16.7077	7.41003	3.49661	10.2145	8.30136	6.48554	12.2113	5.49643	1.64662	2.37201
ARID3B	0.452155	1.34983	1.5702	0.619579	0.970681	0.721194	6.75558	2.17029	1.50585	3.88183	2.51692	1.81419	5.23797	1.26014	0.661343	1.11996
ARID3C	0	0	0	0	0.031559	0	0	0	0.183108	0.062295	0	0	0	0	0.02239	0.552143
ARID4A	0.28208	0.413951	0.566018	1.14036	3.19592	2.45511	4.4291	1.81279	2.46769	2.48326	5.11086	3.50981	6.39839	1.80175	2.59553	2.99617
ARID4B	0.505076	0.46078	1.0916	1.2637	4.70116	3.61288	7.47243	2.17941	5.32334	3.06153	6.99554	4.94319	14.1037	2.3662	4.40496	5.62182
ARID5A	0	0	0.762995	0	0.044772	0.020648	2.53594	0.265923	0.936075	0.126177	0.742419	0.497887	0.280761	0.040359	0.490164	0.10995
ARID5B	0.100887	0.297702	1.3913	0	0	0	0.200061	0	0	0.179127	0.308272	0.07414	0	0.024946	0.064382	0.083554
ARIH1	0.286476	0.781521	0.78678	0.874368	2.43862	1.88493	4.12989	1.86865	3.26038	2.20294	4.00668	3.54019	2.77947	1.4098	2.7543	2.84435
ARIH2	1.2088	2.74769	0	2.27973	1.73507	2.17872	5.60834	3.69638	3.76381	6.58618	4.81736	3.17109	0.304644	4.16126	0.769078	2.37134
ARL1	0.168804	0.633565	3.3581	1.69809	0.410927	0.324257	1.90332	2.56692	1.67787	4.91673	3.83849	3.45899	4.53003	1.55104	0.927554	0.893934
ARL10	0.113333	0.845312	0.599769	0	0.008381	0.001409	0.100809	0.027058	0	0.03001	0	0	0.031319	0	0.014392	0.090051
ARL11	0.326767	0.45096	0.194627	0.107208	0.010779	0	0.071831	0.017397	0	0	0	0.008859	0.050085	0	0	0.019938
ARL13A	0	0	0	0	0	0	0	0	0	0	0	0	0	0	0	0
ARL13B	0	0	0	0.550824	0.766754	0.635828	2.20359	0.97886	0.655383	1.1651	1.31068	0.904307	0.051358	0.496158	0.598922	0.227515
ARL14	0	0	0	0	0	0	0	0	0	0	0	0	0	0	0.049165	0.127662
ARL14EP	0.818969	0.400597	1.84755	1.36453	0.277986	0.386217	1.54124	1.43956	0.773439	3.83523	2.67569	2.3232	5.99278	1.41794	0.407469	0.497087
ARL14EPL	0	0	0.119753	0	0	0	0	0	0	0	0.022037	0	0	0	0.015306	0
ARL15	0.214228	0.023036	1.02848	1.40732	0.263539	0.291021	2.41538	2.4831	0.506594	4.38544	2.65138	2.4725	6.33923	1.79905	0.115592	0.17115
ARL16	1.68333	3.836	6.55471	3.30728	0.781929	0.417346	4.47561	3.57661	1.635	7.55934	3.7428	2.43009	15.6456	2.60146	1.06589	1.02655
ARL17A	0	0	0	0.051355	0.133656	0.027556	0.337432	0.053845	0.054914	0	0	0.108116	0	0.054841	0.140746	0.173595
ARL17B	0.956658	1.53061	0.517876	0	0.020589	0	0.061483	0	0	0.121608	0.041725	0.033552	0.046825	0	0.320438	0.043832
ARL2	5.54391	12.0044	15.9907	22.2321	2.44869	3.73183	24.2984	29.5213	18.4879	42.5178	27.2913	24.7251	41.0152	19.5558	7.5547	7.19359
ARL2BP	0.369074	0	7.25769	9.01977	8.70696	7.89242	11.955	14.6259	20.4735	16.2254	22.7206	20.4033	15.5115	10.7298	10.9894	11.9027
ARL3	0.200699	0.474865	1.53012	0.053158	0.024817	0.054133	0.496283	0.240316	0.397045	0.502626	0.409478	0.293757	0.796122	0.106773	0.106325	0.257095
ARL4A	1.60571	0.811884	1.49013	209.479	497.656	502.467	358.395	337.181	304.569	388.077	412.708	396.146	474.356	327.454	369.792	353.42
ARL4C	2.1345	1.82802	4.46238	0.130153	0.009452	0.023794	0.525158	0.213576	0.338723	0.854082	0.273006	0.225356	1.25288	0.234637	0.027002	0.096183
ARL4D	0.767712	1.27974	1.54412	0.082819	0.027028	0.078953	0.119358	0.087204	0.067283	0.293798	0.055209	0.088441	0.093116	0.245388	0.057604	0.249116
ARL5A	0.836792	0.756576	1.81114	2.57207	0.983592	1.01975	3.00313	4.39512	3.18991	6.87093	5.22185	5.51309	5.42507	2.8502	1.82529	1.62926
ARL5B	0.051966	0	1.6293	1.20791	1.53599	1.22588	3.26484	2.12744	2.91365	3.18643	4.95313	3.38978	5.55057	1.2781	2.6258	2.9915
ARL5C	0	0	0	0	0	0	0	0	0	0	0	0	0	0	0	0
ARL6	0	0	0.036215	0.039825	0.012998	0	0.143553	0.241239	0	0.418334	0	0.063816	0	0.096907	0	0.071896
ARL6IP1	5.43975	8.7012	20.4053	191.478	100.184	97.8254	112.283	163.721	101.976	215.7	164.111	143.769	156.299	155.432	111.512	116.154
ARL6IP4	7.4082	16.471	17.2403	16.8383	3.27046	3.86051	15.1833	20.2968	22.4909	27.3968	23.0609	22.298	31.6428	16.4201	13.1812	16.5887
ARL6IP5	2.13812	5.03991	11.2175	10.9366	4.34467	4.76005	7.61197	11.0055	8.86225	18.3577	21.0489	19.167	23.0291	7.5252	6.20942	6.4599
ARL6IP6	0.540953	0.217994	0.710924	2.00128	0.234656	0.332344	3.91172	2.66509	0.938637	4.23181	1.32635	1.32695	3.70454	2.58725	0.55491	0.528706
ARL8A	1.12995	4.41851	4.24582	1.2835	0.174582	0.01945	2.93367	2.49743	1.99132	2.99339	2.73264	1.65841	11.7717	1.82616	0.281439	1.03063
ARL8B	2.97171	3.38216	5.24222	8.60841	13.6719	13.0144	41.6932	19.5761	62.2899	30.9642	76.0755	70.5646	59.3015	12.8136	36.4442	34.543
ARL9	0	0	0	0.2791	0.173265	0.039385	0.243056	0.225812	0.231695	0.241584	0.372545	0.09263	2.56055	0.231178	0.290551	0.484834
ARMC1	0.348785	1.34056	2.48385	6.34561	1.35408	1.44994	5.38933	7.17249	4.01362	14.4618	8.01708	7.14637	11.9627	4.76879	1.64546	1.66493
ARMC10	0.797121	1.27243	1.61756	1.19168	0.489322	0.262651	2.22049	1.97916	0.947694	3.54818	2.91318	2.49141	3.74931	1.4651	0.311427	0.484375
ARMC12	0	1.06787	0.176138	0	0	0	0.138376	0	0.034732	0	0	0.068442	0	0	0	0.308798
ARMC2	0	0	0.043442	0.055838	0.01564	0	0.05791	0.016828	0.017375	0.072453	0.021499	0	0.363448	0	0.022333	0.028931
ARMC3	0	0	0	0	0	0	0.065721	0	0	0	0	0.019454	0	0	0	0
ARMC5	0.514915	3.46566	2.95741	1.05174	0.946985	0.673509	4.41803	1.78461	1.87905	2.47717	3.40604	3.02193	4.58616	2.13282	1.2755	2.06012
ARMC6	1.54593	3.58849	2.18792	4.61232	2.60274	2.39567	9.15974	5.38341	5.4842	10.2861	8.02194	6.06883	11.7697	5.2963	2.74462	4.18324
ARMC7	0	1.86182	1.39711	0.712797	0	0.021478	0.81607	0.968284	0.832935	1.09455	0.673979	0.274661	1.32186	0.252511	0.034063	0
ARMC8	0.193463	0.744412	0.969499	4.58185	3.63691	2.55956	6.63262	4.94808	3.14681	7.55005	7.16242	5.89435	13.9679	3.87219	2.48945	2.43831
ARMC9	0	0	0.666189	0.335295	0	0.014583	0.096513	0.056226	0.014491	0.205147	0.035781	0.057164	0.362578	0.287993	0	0
ARMCX1	1.38242	0.417932	4.05336	0.014674	0.028752	0.032072	0.127337	0.030928	0.095616	0.189822	0.353947	0.172866	0.48695	0.031677	0	0.035392
ARMCX2	0	0.499392	3.88319	0	0	0.006191	0	0	0	0	0	0	0	0	0	0
ARMCX3	0.430622	1.12073	2.92517	0.719656	0.777108	0.609012	3.49927	1.35319	1.17008	2.31436	4.09598	3.26472	3.73099	0.724492	0.744666	0.907896
ARMCX4	0.125314	0.118667	0.333016	0.011348	0.056432	0.004156	0.065625	0.047905	0.057818	0.059011	0.102309	0.024431	0.093462	0.004096	0.042448	0.053216
ARMCX5	0.40735	0.535237	0.373955	0.411845	0.060549	0.022553	0.77631	0.423416	0.112022	0.920843	0.747783	0.541413	0.748802	0.422828	0.105574	0.024873
ARMCX5-GPRASP2	0	0.478915	0	0	0.047352	0.025163	0	0	0.088903	0	0	0	0.031041	0	0	0.012592
ARMCX6	0.274941	1.38343	2.70235	0.529023	0.461376	0.699486	2.28239	0.65248	0.835774	1.06022	1.62281	1.08808	2.9162	0.7429	0.81648	0.793249
ARMH1	0	0	0	0	0	0	0	0	0	0	0	0	0	0	0	0
ARMH2	0	0	0	0	0	0	0	0	0	0	0	0	0	0	0	0
ARMH3	0.70079	0.165239	1.3086	0.413233	1.1093	0.965331	5.05193	2.74399	1.96725	4.82622	3.76932	3.76805	3.30062	1.81207	0.795266	0.641749
ARMH4	0	0	0.339142	0.043471	0.028422	0.021488	0.088553	0.055051	0.009483	0.084752	0.017629	0.018713	0.013254	0.032943	0.008128	0.02105
ARMS2	0.528456	1.24286	0	0	0	0	0	0	0	0	0	0	0	0	0	0
ARMT1	0.427279	0	2.12171	1.87159	0.769763	0.737491	2.89463	2.55046	1.25504	6.01258	2.53735	2.41674	6.47522	2.21216	0.89006	0.602539
ARNT	0.443493	0	1.53758	3.16955	1.90979	1.30343	7.38073	4.06037	4.48255	6.67598	5.82262	4.76409	7.58258	3.46144	2.9339	3.28954
ARNT2	0	0.407109	0.526062	0	0.011318	0.023769	0.472273	0.03197	0.061366	0.044999	0.0351	0.041916	0.05278	0	0.008092	0.054297
ARNTL	0	0	0	0	0	0	0	0	0	0.11275	0	0	0	0	0	0
ARNTL2	0.330166	0.271385	0.595316	0.045689	0	0.004563	0.024177	0.021917	0	0.151173	0.022462	0.031293	0.265995	0.008994	0.003884	0.030172
ARPC1A	1.94517	3.44484	14.1173	25.1219	8.33175	7.69794	23.2165	31.2862	26.8256	40.0679	45.0012	40.2556	40.0611	25.6125	16.2409	14.805
ARPC1B	19.0123	17.1426	26.3061	3.29402	0	0	7.93073	4.92264	3.49323	11.8684	2.37669	0.315607	20.4462	2.27081	0	0.614827
ARPC2	6.19343	0	4.46183	2.2284	1.38486	1.3955	5.61332	2.833	3.74314	5.39496	7.97507	7.54959	2.05546	1.44938	2.4633	2.0789
ARPC3	15.6932	32.27	37.0228	91.9307	35.6206	36.2318	78.0959	104.41	99.6685	158.522	140.311	144.31	199.889	82.1599	71.7536	67.1469
ARPC4	11.9145	11.4368	15.4791	11.5704	6.51641	6.25168	30.883	27.5423	20.5921	49.8529	31.7257	31.0526	8.62167	15.5896	10.1834	9.91591
ARPC4-TTLL3	1.26121	7.28389	5.10954	0.526144	1.17789	0.579161	4.45427	1.20331	4.67858	2.27256	6.19386	2.88339	20.2762	1.00677	2.99064	4.96273
ARPC5	0.897077	1.01644	1.62056	0.966835	0.179429	0.187692	2.36562	2.00359	0.95754	3.43887	2.21817	1.9134	1.77618	0.911405	0.258603	0.29247
ARPC5L	1.22348	3.50551	2.78329	3.61832	0.669086	0.97791	5.54664	5.6715	4.89672	8.60665	6.60912	5.76119	9.84442	4.26401	3.73694	4.60233
ARPIN	0.204215	0.106362	0.555374	0.003698	0	0	0.016202	0	0.012118	0	0.025009	0.019922	0.005642	0.012043	0.003459	0.081133
ARPIN-AP3S2	0.708234	0	2.52807	1.21418	1.06632	0.839955	2.85857	1.45559	3.22792	3.70304	5.40374	4.57086	1.92506	1.37348	1.27587	1.94932
ARPP19	0.656072	1.24781	4.50976	3.36152	1.28454	0.999941	4.94242	4.30909	3.88024	8.36174	5.19289	4.33568	12.4709	3.26451	1.34979	1.72871
ARPP21	0	0	0	0	0	0	0	0	0	0	0	0	0	0	0	0
ARR3	0	0	0	0	0	0.014315	0	0	0	0	0	0	0	0	0	0
ARRB1	0.987358	1.59826	1.07946	0.191049	0.062459	0.031488	0.177673	0.092751	0.049625	0.14243	0.046505	0.082262	0.340049	0.09253	0.071465	0.124917
ARRB2	3.00455	4.44785	5.763	27.7371	117.182	105.663	113.021	67.0029	209.09	40.4291	155.24	136.333	52.3002	39.8854	162.795	181.457
ARRDC1	3.62775	29.8745	16.9658	0.589662	0.316135	0.263649	3.66165	1.282	2.86163	1.81639	2.0175	1.62945	18.0591	1.43909	0.761538	0.903192
ARRDC2	1.55276	7.84088	3.31016	41.4692	363.855	273.399	392.874	78.0442	274.714	54.7187	176.149	126.754	335.137	83.4752	277.657	338.858
ARRDC3	0.588156	0.711148	3.24259	8.6307	15.7031	14.3305	16.715	11.8881	27.5882	13.922	51.0995	46.3274	27.5336	9.7613	26.4482	24.7665
ARRDC4	0.408832	0.167432	1.06229	4.46078	1.67944	1.27614	13.7997	9.45668	7.06817	18.9554	16.8436	12.9406	19.203	7.20309	4.11805	4.49685
ARRDC5	1.03694	1.42863	0.216017	0	0	0	0	0	0.021451	0	0.052826	0.021149	0	0	0	0.142956
ARSA	0.251974	3.09636	3.21531	1.10973	0.513121	0.330032	3.34339	2.33641	2.18341	2.35608	3.89652	2.87131	7.79467	1.55068	1.14081	1.36222
ARSB	0.573073	1.2792	1.7364	1.63606	0.135137	0.124702	3.91525	2.76067	0.412039	6.23665	1.38343	1.44181	3.35682	2.14105	0.110353	0.271546
ARSD	0.402731	0.941857	1.20278	0.016654	0.003629	0	0.104931	0.005857	0.024208	0.007211	0.052473	0.041795	0.321181	0	0.020747	0.020152
ARSF	0	0	0	0	0	0	0	0	0	0	0	0	0	0	0	0.017231
ARSG	0.197788	0.016148	0.383647	0.282675	0.143347	0.120977	0.531975	0.240625	0.59647	0.231171	1.16473	0.911543	2.12177	0.166324	0.393129	0.455198
ARSH	0	0	0	0	0	0	0	0	0	0	0	0	0	0	0	0.088629
ARSI	0.146569	0.099054	0.50134	0	0	0	0	0	0.010362	0	0	0	0	0	0	0.046013
ARSJ	0	0	0.391902	0	0	0	0	0	0	0	0	0	0	0	0.011668	0
ARSK	0	0.478006	0.25404	0.016094	0.051437	0.020522	0.203069	0.119905	0.018123	0.192839	0.063676	0.038995	0.464499	0.094553	0.032633	0.084555
ARSL	0	0	0	0	0	0	0	0	0	0	0	0	0	0	0	0
ART1	0	0.265813	0	0	0	0.014085	0	0	0.084052	0	0	0	0.038655	0	0.023978	0
ART3	0	0	0	0	0	0	0	0	0	0	0	0	0	0	0	0.271949
ART4	0	0.231134	0	6.12639	3.8712	3.27169	11.4266	8.99274	3.3727	10.2588	9.9993	7.80963	9.76614	9.09755	2.94747	3.23449
ART5	0	0	0	0	0	0.016614	0	0	0	0	0	0	0	0	0	0.146963
ARTN	0	0.460316	0	0	0.042274	0.008836	0.233859	0.10231	0.456676	0.020921	0.108297	0.086598	1.04807	0.069841	0.270763	0.546151
ARV1	0.260838	0	1.15164	7.93477	0.295069	0.298238	2.63547	5.30143	0.794564	10.2342	2.06285	3.1132	8.92597	4.09493	0.379045	0.772174
ARVCF	0.440975	0	0.60389	0.690212	0.347529	0.23025	3.0573	1.26354	1.90953	1.63438	2.41616	1.56322	4.79157	1.40569	0.604236	0.812646
ARX	0.272183	0.375516	0	0	0	0	0	0	0.044911	0	0	0	0	0	0	0.02493
AS3MT	0	1.41752	0.879784	0	0.121684	0	0.043819	0	0	0.128641	0.400124	0	1.14522	0	0.161888	0.389676
ASAH1	3.00699	3.92423	7.82892	10.265	4.80748	3.86603	36.9238	22.0124	14.9133	22.6329	21.5196	18.7399	16.6262	13.4015	5.66984	7.46096
ASAH2	0	0	0	0.010911	0.005128	0.006462	0.049309	0.020692	0.021389	0.020342	0.005302	0.013328	0.041322	0.012737	0.018334	0.016431
ASAH2B	0.190294	0	0.139674	0	0.015404	0	0.118182	0.08287	0.034227	0	0.021177	0.033763	0.478418	0	0.014665	0.052614
ASAP1	0.275149	0.515572	1.1782	7.94075	4.09051	2.83947	7.48429	8.3406	5.63262	8.13155	6.78768	5.50368	8.56709	7.83627	5.31599	5.59968
ASAP2	0.013349	0	1.48995	0.005119	0	0.011188	0.037047	0	0	0	0	0.005481	0.008427	0.022273	0.024988	0.013354
ASAP3	0	0	1.19612	0.120672	0.895536	0.70424	0.949569	0.17936	0.773287	0.076825	0.422431	0.356385	0.287114	0.192212	0.729178	0.830708
ASB1	0	1.6614	1.38923	1.68112	1.84375	1.21697	4.99132	2.34825	2.02668	3.06202	7.51629	5.33209	6.62011	3.51222	1.62765	2.06911
ASB10	0.505216	0	0	0	0	0	0	0	0	0	0	0	0.080198	0	0.016512	0.128492
ASB11	0.096538	1.48394	0.239432	0	0.014356	0.012028	0.047769	0	0.071695	0	0	0.011786	0	0.01187	0.112609	0.119397
ASB12	0	0.556644	0	0.108687	0	0	0	0	0	0	0	0	0	0	0	0.097841
ASB13	0.899129	2.32744	0.920665	0.323179	0.144554	0.244032	0.384787	0.291588	0.084223	0.688014	0	0	0.436105	0.04342	0.061848	0.173656
ASB14	0	0	0	0	0	0	0	0	0	0	0	0	0	0	0	0.011212
ASB15	0	0.156293	0.032612	0	0	0	0	0	0	0	0	0	0	0	0.005596	0.014494
ASB16	0	0	0	0	0	0	0	0	0	0	0	0	0.760565	0	0	0
ASB17	0	0	0	0	0	0	0	0	0	0	0	0	0	0	0	0
ASB18	0.056376	0	0	0	0	0	0	0	0	0	0	0	0	0	0.024001	0.093473
ASB2	0	0	0	0	0	0	0	0	0	0	0	0	0	0.023654	0	0.056789
ASB3	0.93164	3.19886	1.07125	1.41125	0.960486	1.03441	2.26695	1.5242	1.20116	2.74304	1.87572	1.51519	3.66981	1.36511	1.11481	1.61312
ASB4	0	0	0	0	0	0	0	0	0.022968	0	0.056527	0	0	0	0	0.076536
ASB5	0	0	3.95205	0	0	0	0.014219	0	0.032006	0	0	0	0.133753	0	0	0
ASB6	0.629467	3.09514	1.72232	2.87502	3.15556	2.81555	7.02574	3.68636	6.83012	7.29034	10.3957	9.04018	18.0102	4.67784	5.6277	6.26483
ASB7	0.333274	0.27303	0.67507	1.43567	1.81246	1.63012	4.59682	2.98052	1.86279	3.88046	5.01434	4.40687	4.41486	2.37123	1.30236	1.51201
ASB8	1.30135	0.868924	2.19367	7.68835	6.61728	6.10707	11.9204	10.6581	8.24869	13.9209	14.5114	13.1716	13.1302	8.10272	8.66423	8.02159
ASB9	0	0	0	0.074764	0	0	0	0	0	0	0	0	0	0	0	0
ASCC1	0.344967	0	0.704719	0.135971	0.538903	0.231581	0.733815	0.895289	1.96493	1.79645	2.04409	1.61517	0.861201	0.56804	0.753733	0.482657
ASCC2	0.18373	0.837148	1.08689	8.59924	13.6519	12.9553	7.98784	11.1314	13.8035	12.7107	15.7998	16.6556	10.0156	11.1418	11.5339	14.4326
ASCC3	0.442195	0.23943	1.70063	1.12115	0.79884	0.678043	4.53231	2.04456	1.64158	4.81347	4.71187	3.7806	3.4706	1.4344	0.877407	0.986197
ASCL1	0	0.603615	0	0	0	0	0	0	0	0	0	0	0	0	0	0.044335
ASCL2	0.437068	1.66252	0	0.156039	0	0	0.128385	0.070399	0.07239	0.028735	0	0	0.600538	0.120032	0	0.026805
ASCL3	0	0	0	0	0	0	0	0	0	0	0	0	0	0	0	0.176329
ASCL4	0.390053	0.712237	0	0	0	0	0	0	0	0	0	0.03468	0	0	0.01506	0.078115
ASCL5	0.268577	1.3885	0.083591	0	0.030037	0	0	0	0.03329	0	0	0	0	0	0	0.221801
ASDURF	0	1.43355	4.27301	5.84061	8.40198	7.83019	12.6193	9.18738	9.31095	12.0421	13.6457	16.2702	11.1897	4.1842	5.77933	6.06405
ASF1A	0.905888	0.421875	0.409064	18.6647	12.1995	12.5866	14.469	18.8971	18.6769	24.3731	28.9259	27.3941	23.0338	14.8012	21.1213	19.344
ASF1B	2.69692	4.67571	4.99735	24.7249	1.53235	1.44599	18.0159	21.005	1.13257	36.2397	6.62579	5.19367	10.2588	22.5381	0.79704	1.15782
ASGR1	0	1.53562	0.80611	0	0.172998	0.183969	0.742214	0	0.112603	0.201108	0.138291	0.138725	2.13599	0.224162	0.024092	0.031277
ASGR2	0.435806	12.7737	11.7942	0.218439	0	0	0	0	0	0	0	0	0.870083	0.15674	0	0
ASH1L	0.25116	0.477241	0.385873	0.072762	2.29044	1.19481	6.02034	0.332487	3.05782	0.777903	2.52967	2.33436	3.32459	0.962012	2.46592	2.37637
ASH2L	0.539027	1.88447	0.376482	9.01309	1.7596	0.722055	3.32718	5.43674	2.16048	8.59682	3.99404	4.79327	16.9128	5.41341	2.14655	2.29968
ASIC1	0	0.139474	0	0	0.004653	0	0.031022	0	0	0.00924	0	0	0	0	0	0.12052
ASIC2	0	0.547034	0.014118	0	0	0	0	0	0	0	0	0	0	0	0.014518	0.225673
ASIC3	0	0	0.46093	0.027597	0.148347	0.082972	1.2301	0.101802	0.869222	0	1.22307	0.55687	8.85054	0.145065	0.597488	0.433557
ASIC4	0.709337	0.524478	0	0	0.297363	0.230812	0.676237	0.025233	0.583573	0.062	0.969351	0.503111	1.10254	0.103417	0.336857	0.524482
ASIC5	0	0	0	0	0	0	0	0	0	0	0	0	0	0	0	0
ASIP	0.66767	5.86429	0.293206	0	0.103585	0	0	0	0.168723	0	0	0.248817	0	0	0	0.751747
ASL	0.522326	0.445971	1.73799	0.801428	0.093832	0.0856	2.57723	1.47766	0.507675	4.80372	1.07469	0.648111	4.16489	0.925219	0	0.186356
ASMT	0	0	0	0	0.116699	0.027775	0.073451	0.05378	0.248622	0	0.237534	0.163363	2.40165	0.027495	0.141855	0.337605
ASMTL	1.5991	2.4204	5.75651	1.64409	0.147985	0.098878	4.2584	3.70337	3.5871	7.84206	4.53919	3.58368	6.25392	2.23008	0.884722	0.512401
ASNS	0	0	1.06742	28.3953	6.72614	4.84854	46.0367	63.2003	20.9238	85.3596	53.3708	49.0658	66.1066	44.5958	9.3029	8.37863
ASNSD1	0	1.87021	0.438748	9.23033	6.84893	7.49068	6.53063	9.54784	14.4102	15.333	12.9526	12.7908	27.1671	8.60664	12.4815	12.1247
ASPA	0	0	0	0	0	0	0	0	0	0	0	0	0	0	0	0
ASPDH	0.803042	0	0	0	0	0	0	0	0	0	0	0	0.205467	0	0.128826	0
ASPG	0	0	0	0	0	0	0	0	0	0	0	0	0	0	0	0
ASPH	0.189862	0.533628	5.28064	0.231301	0.472615	0.372059	0.766558	0.289469	0.938177	0.293499	0.653829	0.717467	0.835527	0.157182	0.980032	0.949795
ASPHD1	0	0	0	0	0	0	0	0	0	0.272935	0	0	0	0.057305	0	0
ASPHD2	0.307409	0	0.142666	0.061118	0.313828	0.210536	0.443501	0.221006	0.712935	0.305781	0.658477	0.703254	1.43102	0.217121	0.513144	0.791427
ASPM	0.107492	0.600039	0.945157	1.3647	1.64679	1.48271	8.77231	2.73561	0.45913	5.43902	5.15806	3.50211	5.77605	3.39877	0.821412	0.809657
ASPN	0	0	0.044706	0	0	0	0	0	0.013376	0.031869	0.016522	0	0	0	0.034377	0
ASPRV1	0	0	0	0.170197	0	0	0.334182	0.136689	0.357061	0.101682	0	0	0.080645	0.082977	0.073006	0.260244
ASPSCR1	0	0.658891	1.28468	3.07285	0.362819	1.25682	5.63509	3.24578	7.44977	6.32592	5.88033	5.95109	9.21837	4.07057	4.34708	4.527
ASRGL1	1.23893	2.50309	2.60701	0.216581	0.079576	0	0.11754	0.171206	0.058829	0.49054	0.127093	0.014504	0.856641	0.084349	0	0.081607
ASS1	0	0	16.6701	0.128762	0.081878	0.210352	3.36623	4.27031	2.06824	4.15107	4.82102	4.9483	21.5382	1.38702	0.159155	0.593705
ASTE1	0	0	0	0.175882	0	0	0.288501	0.08428	0.273317	0.492439	0.230625	0.173526	0.356739	0.160055	0.176178	0.118888
ASTL	0	0	0	0	0	0	0.036908	0	0.013853	0.016502	0	0	0.019263	0	0.023733	0.076905
ASTN1	0	0	0.137949	0	0	0	0	0	0	0	0	0	0	0	0	0.050138
ASTN2	0.045213	0.139141	0.170878	0.012285	0.008033	0	0.011919	0.017287	0.022336	0.01597	0.027684	0.083745	0.024978	0.004434	0.022974	0.114033
ASXL1	0.993585	1.61579	2.71413	3.32929	3.70497	2.75168	12.9827	4.46335	7.5099	5.17244	7.71377	6.03981	17.3711	5.35848	5.50054	6.81789
ASXL2	0.470913	0.523763	0.702237	0.84321	1.55161	1.08107	5.04871	1.30748	1.84998	2.15356	3.14904	2.56297	2.91145	1.11616	1.22371	1.40816
ASXL3	0.121018	0.14568	0.060429	0	0	0	0.006933	0	0.010392	0	0	0	0.025447	0	0	0.008649
ASZ1	0	0	0	0	0	0	0	0	0	0	0	0	0	0	0	0
ATAD1	0	0	1.64302	0.535678	0.408878	0.268461	2.00602	1.52032	0.593303	3.58853	2.32027	2.14969	0.819914	0.613877	0.276084	0.123546
ATAD2	0.577074	0	1.49817	11.6503	1.28743	1.34869	12.3771	11.6183	1.06366	18.9824	5.43983	4.98726	13.3359	11.6086	0.833054	0.850274
ATAD2B	0.244942	0.478264	0.388094	0.534845	1.47188	1.0918	2.68341	1.05617	1.43146	1.36397	2.89944	1.99016	3.32518	0.960292	1.18877	1.3218
ATAD3A	3.76216	5.21359	11.3088	4.66318	0.419932	0.294139	6.91163	6.82672	3.63375	19.2889	3.16078	2.55973	5.52513	5.72314	2.00477	1.77795
ATAD3B	1.21502	5.23079	7.47675	0.534876	0.012733	0.075164	2.54954	1.2045	2.02487	3.71208	1.21138	1.09568	3.87665	0.836448	0.967601	1.18171
ATAD3C	0.613684	1.00163	0.01367	0.052714	0	0	0.010984	0.039754	0.041142	0.019566	0	0.034991	0	0	0.07753	0.247721
ATAD5	0.062701	0.417738	0.325354	0.844233	0.107183	0.085544	2.25405	0.999096	0.205649	2.25801	0.677838	0.405806	4.31192	1.48639	0.126455	0.175706
ATAT1	0	0.753743	0.085808	0.09048	0.083458	0.006355	0.428162	0.18969	0.354076	0.343981	0.269066	0.184329	1.87697	0.150546	0.097364	0.140203
ATCAY	0	0	0	0	0	0	0	0	0	0	0	0	0	0	0	0
ATE1	0	1.02306	0.976925	0.696318	0.527874	0.44317	1.28448	0.845817	0.477304	2.052	1.01114	0.969071	1.76346	0.626853	0.366256	0.623007
ATF1	0	0	0.358474	6.32706	6.68229	7.86736	19.3384	12.7768	12.4588	20.1321	22.4436	21.067	10.56	6.56572	8.00295	6.83056
ATF2	0.532252	0.90753	1.35079	1.17228	1.49325	1.3597	2.43999	1.92551	2.10712	2.31193	4.60498	3.10726	10.3707	1.64445	1.59675	1.95809
ATF3	0	0	0	0.868371	2.23612	2.91274	26.9082	4.99269	13.4511	6.39156	23.6808	21.2709	15.0291	2.50322	9.99545	5.97721
ATF4	9.46395	15.6626	28.5409	101.075	72.6309	72.517	279.262	194.103	155.795	225.103	294.082	272.705	484.649	178.084	117.035	116.748
ATF5	0.172948	0.051059	2.63014	44.1374	29.264	26.592	142.112	142.174	105.682	55.4772	181.112	166.179	53.2669	135.7	54.055	63.2803
ATF6	0.107377	0	2.03018	2.43903	2.00865	1.51194	4.69575	3.57619	6.1919	6.34444	9.4646	9.53241	13.5543	3.53762	4.17143	4.27343
ATF6B	2.64935	3.78878	5.3217	8.28338	3.55881	2.76805	21.4002	13.4968	10.2901	18.5684	24.0992	20.6267	25.6588	11.4219	5.84177	7.52891
ATF7	0.4017	0	0.506701	0.299809	0.05122	0.176995	1.41512	0.476456	0.261023	0.925918	0.890561	0.4729	1.34382	0.141132	0.203234	0.138215
ATF7-NPFF	0	0	0.317713	0.324415	0.352819	0.098954	3.47058	0.411128	0.496817	1.16795	0.433175	0.714543	0.961754	0.966512	0	0.029716
ATF7IP	0.200905	0.347581	1.10187	1.78663	2.00945	1.25177	4.24941	2.33239	2.43263	3.82295	6.07714	4.52615	5.28761	2.25785	1.86452	1.6923
ATF7IP2	0	0	0	0.279044	0	0.143653	0	0.313439	0	0.677475	0.30418	0	1.18569	0.219438	0	0
ATG10	0.151	0.612272	0.374114	0.588645	0.019232	0.048363	0.198453	0.517286	0.064058	0.699561	0.224408	0.210616	0.371802	0.413556	0.064032	0.130376
ATG101	0.202799	6.70227	4.32269	4.3616	5.8705	6.12782	18.0739	9.16064	23.5324	14.5687	27.5462	29.7693	17.68	7.71418	13.5377	17.3591
ATG12	0.399497	0.110907	1.22052	3.19633	1.81688	1.88054	3.88546	4.23834	3.47086	7.4182	5.2904	4.79169	8.28811	2.99923	3.09389	2.72575
ATG13	0	4.70552	0	0.100476	0.610352	1.24701	9.55457	2.09416	2.93114	2.40909	5.27549	4.53192	0.159138	2.72276	0.861166	3.04258
ATG14	0	0	0.515163	7.23734	51.38	43.0287	50.8026	13.5882	38.699	11.4209	48.0617	38.0761	28.4177	11.6165	38.6651	35.7463
ATG16L1	0	0	0	0	0	0	0	0	0	0	0	0	0	0	0	0
ATG16L2	0	0	0.185248	0	0.018566	0.013883	0.170135	0	0	0.032351	0	0.021523	0.211565	0.043427	0.063247	0
ATG2A	0	1.58825	2.95496	4.95595	12.2242	7.3601	40.0034	10.8836	25.0149	11.2984	20.3304	15.5519	27.9865	11.4628	21.0265	25.8355
ATG2B	0.027848	0.263778	0.669954	1.56864	9.29656	5.60821	14.367	4.14052	9.89768	4.11117	12.5216	8.47892	14.2635	5.36721	9.34134	11.449
ATG3	0	0	1.54597	2.56518	4.63466	3.5914	3.97063	2.47457	5.96918	3.99947	5.74128	4.86657	7.13595	1.99382	5.85476	5.22657
ATG4A	0	0.263978	0	3.11063	5.29304	3.91686	15.3821	9.84803	26.4505	14.049	41.7589	30.7037	79.3877	6.5365	23.26	25.6466
ATG4B	2.00223	8.70075	4.14431	4.54476	2.02193	1.47168	8.42633	5.15341	8.51667	8.92353	10.8103	7.8226	18.3638	5.24797	5.12381	6.72915
ATG4C	0.400543	0.368415	1.01103	0.961663	0.039687	0.099786	0.631205	1.05676	0.088115	2.23072	0.503817	0.271602	1.18119	0.43761	0.056621	0.061139
ATG4D	1.90731	2.79377	4.97124	25.6817	24.0495	19.8272	40.5647	29.5479	23.7987	29.2438	31.8386	27.5843	36.1687	33.026	23.9629	25.493
ATG5	0	0	0.691766	0.903344	0.605125	0.429779	0.928263	0.876772	0.907417	1.38881	1.53507	1.6553	0.110479	0.619731	1.05475	0.676312
ATG7	0.664933	3.03456	0.140852	0.154427	0.201219	0.171102	1.24419	0.729908	0.041505	2.07523	0.431242	0.63508	1.19365	0.662093	0	0.23071
ATG9A	0	0	1.36396	27.6086	55.6144	41.2131	100.009	48.1809	50.9468	44.8023	55.3598	47.8883	61.3221	42.8527	42.7733	50.574
ATG9B	0.145831	0.653486	0	0	0.045584	0.006957	0.156629	0	0.075999	0.008232	0.119769	0.054528	0.414712	0	0.011842	0.046431
ATIC	3.5517	1.83063	8.55874	5.60965	0.28049	0.066399	7.62346	6.65434	1.7704	19.7223	2.89612	2.41777	8.17812	3.5944	0.192243	0.345146
ATL1	0	0	0	0	0	0.023524	0.047939	0.042713	0.021711	0.060129	0.022697	0.018461	0.230407	0.039332	0.015791	0
ATL2	0.191892	0.897629	0.967572	6.60803	7.82035	5.82851	13.7193	12.3842	10.3068	14.6346	13.765	11.049	27.2125	10.0824	8.4034	9.98504
ATL3	0.847316	1.19497	2.52543	1.55121	0.385688	0.376716	2.24554	2.02912	1.34275	3.43394	1.82135	1.85537	2.95675	1.42479	0.797747	0.805591
ATM	0.056783	0.196088	0.896498	0.278176	0.132941	0.089419	1.5175	0.361422	0.565365	0.495559	0.828447	0.426471	2.90987	0.343067	0.19627	0.228148
ATMIN	0.517713	1.74598	2.20476	1.11815	1.49703	1.54557	5.50142	2.98008	4.91252	3.18493	7.36258	7.47832	6.24794	2.61957	2.95067	2.83245
ATN1	1.03773	2.43838	5.07926	0.868576	0.572445	0.539034	13.1177	3.37528	4.32669	5.02028	7.66354	5.93379	24.7121	1.97524	0.745092	1.17328
ATOH1	0.183353	0.469538	0	0	0	0	0	0	0.015144	0	0	0	0	0	0	0
ATOH7	0	0.557958	0	0	0	0	0	0	0.093914	0	0	0	0	0	0	0.31296
ATOH8	0	0	0.255177	0	0	0	0	0	0	0	0	0	0	0	0	0.133732
ATOX1	0.17582	0.398722	0.180988	0.132959	0.008691	0.043765	0.183539	0.063179	0.217326	0.293468	0.215251	0.198887	1.11215	0.064729	0.13658	0.064328
ATP10A	0	0.313894	0.487802	0	0	0	0	0	0.009036	0	0	0	0.063149	0	0.026185	0.173038
ATP10B	0.073202	0	0	0	0.00271	0	0.00603	0.004373	0.004521	0	0	0	0	0	0	0.015051
ATP10D	0	0	1.12421	0.023904	0.03595	0.058079	0.370249	0.044636	0.075586	0.038483	0.114357	0.12038	0.195326	0.013737	0.075136	0.010046
ATP11A	0.406961	0.257605	0.655208	0.343765	0.116628	0.065788	3.18626	1.11087	0.562458	2.01244	0.747569	0.604269	2.19738	0.944119	0.085877	0.270458
ATP11B	0	0	2.35447	1.52525	1.55601	1.22965	25.9717	6.98449	2.8338	10.6694	8.68956	6.97018	3.1666	5.86948	1.31024	2.28606
ATP11C	0	0.053147	0.937018	0.225713	0.172837	0.120633	1.58224	0.497866	0.526824	1.12263	1.16794	0.812231	1.61238	0.331409	0.190133	0.246272
ATP12A	0.086535	0.529009	0	0	0	0	0	0	0.007131	0	0	0	0	0	0	0.031659
ATP13A1	1.81022	11.602	9.65984	2.39643	1.18224	0.821834	7.66963	4.27348	7.53703	7.02596	7.53623	5.56507	25.4033	4.0687	4.73435	6.41541
ATP13A2	0.856422	0	1.89296	0.042933	0.016329	0.027008	0.328457	0.271415	0.138203	0.583708	0.097835	0.056964	0.220199	0.140918	0.030616	0.043784
ATP13A3	0.709353	0	2.47018	1.85085	0.574408	0.641672	6.1516	2.32285	2.56551	4.43505	3.06008	2.17633	5.85404	2.08389	1.41013	1.10539
ATP13A4	0.058907	0.229105	0.131334	0	0.004983	0	0.027729	0	0.024942	0	0	0.00461	0	0	0.005842	0.006719
ATP13A5	0	0	0	0	0	0	0	0	0	0	0	0	0	0	0	0.017845
ATP1A1	1.48698	0	6.94191	2.38119	1.19304	1.04033	19.59	5.82394	4.53858	13.033	9.5277	5.60346	2.53021	5.99426	1.21514	0.869971
ATP1A2	0.092477	0.177409	2.48143	0	0.039072	0	0	0	0	0	0	0	0	0	0	0.041393
ATP1A3	0	0	0	0	0.218174	0.131224	0.116853	0.047501	0.23173	0	0.124659	0	0.031653	0.025569	0.246319	0.063836
ATP1A4	0	0	0	0	0	0	0.165683	0	0.04165	0	0	0	0	0	0	0
ATP1B1	0	0.240483	2.25026	0.06947	0	0.006336	0.369064	0.427235	0.239217	0.509955	0.110025	0.062088	2.64547	0.150097	0.021572	0.055914
ATP1B2	0	0	0.483076	23.8224	2.6117	1.89336	9.11193	21.6531	2.5831	22.0291	7.85243	11.6052	1.47526	17.7718	4.24599	3.59781
ATP1B3	0	0	0	0	0	0	0.212556	1.17346	0	0.822609	0.404952	0.215137	0	0	0.067764	0
ATP1B4	0	0	0	0	0.004045	0.013581	0.008993	0	0.067436	0	0.025052	0.013306	0	0	0.034676	0.037425
ATP23	1.07046	0	0	0.757336	0.259645	0.216175	0.726646	0.63877	0.294453	1.05391	0.572406	0.292631	1.3788	0.622112	0.246777	0.86014
ATP2A1	0.16438	0.734571	0.105443	0.066379	0.108455	0.031837	1.10936	0.032441	1.39142	0.053824	0.793667	0.606063	2.77418	0.224305	0.673566	0.830291
ATP2A2	0	0	2.95122	0.21632	0.43997	0.219394	3.54365	0.917487	0.141893	1.78899	0.948075	1.01697	0.16712	0.659404	0.491686	0.489277
ATP2A3	4.98679	15.9497	15.1495	0.160381	0	0	1.70963	0.225623	0.103596	0.354882	0	0.031939	1.91658	0.424222	0.027745	0.507931
ATP2B1	0.311831	0.453465	5.77528	2.48535	3.32386	2.82131	19.2581	10.0017	8.28641	11.3757	18.8613	15.0639	18.8698	8.0636	4.2782	4.61132
ATP2B2	0.02108	0	0.023074	0	0.002079	0	0	0	0	0	0.012909	0	0.014561	0.006888	0.00344	0.05392
ATP2B3	0	0	0	0	0	0	0	0	0	0	0	0	0	0	0	0
ATP2B4	0.127047	0.163701	1.87594	0.851993	1.05363	0.5723	1.59005	0.570236	0.61809	0.73789	0.314462	0.224828	0.136261	0.578374	0.77572	1.08254
ATP2C1	1.4991	2.50797	3.39252	3.71595	2.34048	1.90224	6.13237	5.08531	5.13767	9.29528	9.16872	6.64883	14.9322	4.14985	4.04297	4.48915
ATP2C2	0	0	0.092076	0	0.011049	0	0	0	0	0	0	0	0	0	0	0.030651
ATP4A	0.138157	0	0	0	0	0	0.056941	0	0.110797	0	0	0	0	0	0.029278	0.12098
ATP4B	0	0	0	0	0	0	0	0	0	0	0	0	0	0	0.020407	0
ATP5F1A	1.20365	1.36963	2.55939	2.12745	0.296685	0.338216	3.7546	4.03339	0.852633	9.40726	2.69649	2.44827	2.20781	2.97851	0.317363	0.608214
ATP5F1B	21.1809	22.8296	49.6325	74.9073	56.0765	55.5678	154.091	123.035	84.1851	230.356	143.428	133.731	103.749	81.1983	53.5289	55.1258
ATP5F1C	10.646	0	17.085	25.1407	4.82434	5.87168	24.1595	28.9042	14.138	62.729	27.8547	27.3421	41.3483	19.542	6.52681	6.33685
ATP5F1D	22.2243	33.6968	39.7182	51.6558	27.5202	25.3772	87.3017	85.5125	118.685	125.134	173.793	153.191	122.853	60.33	73.877	85.7111
ATP5F1E	4.76004	4.12806	5.53427	30.2209	14.6562	19.5146	17.4251	30.4558	27.6612	45.0994	42.7697	42.4642	70.484	29.7165	25.9625	23.0429
ATP5IF1	0.516578	7.66012	8.94333	62.4616	8.88344	9.42007	19.3983	37.899	27.6087	59.297	46.1342	45.7184	41.5477	38.1621	22.2765	24.7409
ATP5MC1	16.2327	8.62573	12.9438	44.069	1.31391	1.00843	25.9778	32.6196	16.9171	86.7274	9.66163	12.0794	48.7435	29.6924	8.06838	9.81988
ATP5MC2	24.8114	25.8476	26.6557	32.6203	1.37207	2.08981	21.0972	28.9924	13.4283	71.5914	20.9215	15.5807	94.4105	23.809	5.9177	4.27011
ATP5MC3	3.07838	3.70027	7.38037	6.72352	0.372484	0.430799	5.94527	8.69176	0.921378	21.3341	4.39538	4.49298	6.42832	5.1091	0.576814	0.395353
ATP5ME	48.9961	77.0905	77.4698	154.279	35.8504	50.0642	110.152	177.548	233.597	455.146	308.459	272.362	676.664	160.727	164.878	175.731
ATP5MF	28.0254	12.4181	42.205	148.009	52.4859	64.505	107.557	170.574	186.202	315.562	208.029	214.21	326.419	159.058	135.244	142.787
ATP5MF-PTCD1	0.579955	0	0	0	0	0	0.497844	0.411635	0.021848	1.03373	0.061184	0.104764	0	0.03431	0	0
ATP5MG	9.1507	10.3762	20.7224	66.2403	38.8838	41.8325	56.2139	71.8077	81.9812	106.896	101.867	99.7305	144.315	63.9373	78.4059	69.613
ATP5MGL	0	0	0	0	0.133404	0	0	0	0.328872	0	0	0	1.04335	0.054739	0	0.243897
ATP5MJ	19.5904	19.8606	35.0704	80.2087	26.3162	36.4196	37.7093	73.3649	91.8498	122.487	90.7185	88.8515	157.545	70.8631	86.6696	74.721
ATP5MK	7.50275	4.35867	7.35967	13.9524	9.89244	11.1855	17.8835	21.7092	31.7807	42.1111	42.3351	41.9605	62.3165	14.6461	18.7997	18.5952
ATP5PB	3.68076	8.376	7.60556	21.049	4.25268	4.99609	15.9917	20.1252	10.599	50.2874	21.2838	21.7034	31.8434	15.3507	6.27267	7.17969
ATP5PD	12.7212	6.0765	41.613	126.904	12.6188	15.5868	53.7217	112.448	79.6872	197.335	122.867	115.52	217.241	105.374	39.9259	43.9224
ATP5PF	7.87361	10.2859	7.55324	17.2223	4.10277	6.20284	9.48526	17.1838	13.61	38.3691	17.3712	16.3852	31.1726	14.8193	13.9453	15.4412
ATP5PO	14.3587	20.9134	31.4727	80.6413	13.5525	13.2213	43.3456	82.7414	27.1818	168.228	60.116	64.4385	86.4421	67.4018	13.1737	13.7308
ATP6AP1	0	0	0	0	2.04931	0	16.2665	7.43731	2.60629	10.4451	7.99897	4.20126	0.104248	0	0	0.282108
ATP6AP2	0	0	4.28655	3.02747	1.10876	2.06375	7.98049	3.28322	3.59099	8.62647	9.71029	12.7367	0	2.82186	0.708094	2.47451
ATP6V0A1	0.30211	0.51041	2.30857	4.22974	3.09628	2.15998	19.8082	9.28103	2.68582	17.3277	12.0762	9.62354	13.4064	6.55905	1.86858	2.60928
ATP6V0A2	0.553984	1.90595	1.15935	1.2229	0.195119	0.276178	1.79787	1.34933	0.895597	1.84808	1.92945	1.33916	4.21464	1.34423	0.945415	0.920934
ATP6V0A4	0	0.491329	0	0	0	0	0	0	0.020558	0	0	0	0	0	0	0.017535
ATP6V0B	0	0	0	6.49768	2.63726	4.67785	19.8995	10.3351	10.6686	17.9305	20.7409	10.3328	15.6255	7.94993	7.37472	5.65707
ATP6V0C	20.2844	23.6573	51.7847	272.522	470.558	429.396	524.169	400.579	813.803	381.829	519.834	472.633	606.829	408.947	788.681	915.161
ATP6V0D1	3.98319	2.41313	5.07799	16.9734	14.1468	12.4642	41.4194	25.6612	32.7421	39.2045	41.2277	38.4425	26.2049	22.0877	18.83	21.7309
ATP6V0D2	0	0	0	0	0	0	0	0	0	0	0	0	0	0	0	0
ATP6V0E1	7.54218	5.93454	12.4405	35.0533	67.9871	64.6678	66.2053	56.2975	92.6555	62.287	76.3151	72.376	150.739	55.2465	99.3502	100.24
ATP6V0E2	0.944961	0.963155	1.51284	0.48489	0	0	0.254954	0.286194	0	1.37082	0	0	0.350839	0.325626	0.032399	0.100337
ATP6V1A	1.21957	0.951111	3.09186	11.5386	10.217	8.79505	19.6695	19.8325	12.2408	32.6716	28.978	25.7722	16.3167	18.0202	12.6385	11.9009
ATP6V1B1	0	0	0.7216	0	0	0	0	0	0.089742	0	0	0	0.124506	0	0	0.318913
ATP6V1B2	2.20839	4.27086	6.69961	41.8405	62.2861	57.6507	168.635	107.811	121.089	143.076	223.634	195.934	133.135	99.6637	93.4669	91.3468
ATP6V1C1	1.10265	0	3.20222	6.73648	33.9277	30.8954	29.2909	10.284	32.1577	19.8835	43.0201	38.628	27.7345	8.69642	31.5413	33.8294
ATP6V1C2	0	0	0	0	0	0	0	0	0	0	0	0	0	0	0	0
ATP6V1D	0	2.14045	0	0.132996	0.950375	0.318777	0.84012	0.347868	0.494607	0.084008	1.1955	0.556067	1.33352	0.424223	0.723654	0.629259
ATP6V1E1	4.48623	7.64617	13.7769	48.1622	90.0039	90.3496	89.7354	66.204	165	100.631	165.361	153.228	190.653	59.3046	144.376	136.726
ATP6V1E2	0.346795	0.778565	0	0	0.05173	0	0.022897	0.033386	0.05159	0.14338	0	0.016957	0.119341	0	0	0.038193
ATP6V1F	22.4546	33.2592	33.2655	28.86	4.79507	7.04851	28.284	31.7255	22.8932	55.781	31.1683	29.263	76.2961	26.2311	10.8548	10.0681
ATP6V1FNB	0.098996	0.936931	0	0	0.014688	0.024647	0.293748	0.047412	0.089759	0.038889	0.111088	0.088546	0.803666	0.024306	0.05594	0.307964
ATP6V1G1	1.82966	0	5.09034	4.88792	6.88492	7.82419	11.3966	9.49876	11.2058	15.6952	16.6956	19.4065	24.9316	7.20286	8.62254	7.77697
ATP6V1G2	0	0	0.193169	0	0.032132	0.026776	0.14163	0	0.079888	0.031708	0.130894	0.078742	0.367682	0	0.091169	0
ATP6V1G3	0	0	0	0	0	0	0	0	0	0	0	0	0	0	0	0
ATP6V1H	0	0	1.20574	4.35396	3.92555	3.68331	6.80063	6.65867	6.86236	12.9615	10.5333	9.67482	2.94879	5.84018	4.63586	3.97496
ATP7A	0.155104	0.344185	0.228764	2.65859	5.12566	3.93477	11.4831	5.88036	3.88312	7.52252	10.5798	9.16599	10.6836	4.68055	3.29618	3.50053
ATP7B	0	0	0.279307	0.477101	0.383351	0.20283	6.82569	4.00968	1.35607	7.80743	2.15039	1.82821	4.58333	2.56274	0.381009	0.571191
ATP8A1	0.201768	0.433461	0.196348	0.008977	0.01327	0.001859	0	0.0253	0	0.061576	0.032032	0	0.238202	0.051279	0	0
ATP8A2	0.063608	0.143075	0.093967	0	0.039133	0	0.03353	0.060757	0.029402	0.09358	0.022084	0.019007	0.070305	0.024936	0.010771	0.03486
ATP8B1	0	0	1.72526	0	0.00901	0	0	0	0.125251	0	0.080705	0	0	0	0.034353	0.044484
ATP8B2	0.429308	0.607239	3.65844	0.170794	0.426196	0.290349	3.4396	0.330427	0.553984	0.812475	0.829385	0.490789	3.72318	0.195148	0.399118	0.571021
ATP8B3	0	0.541664	0.082428	0	0.050235	0.072612	0.149862	0.012285	0.102275	0	0.190451	0.057061	0.464679	0.065494	0.169186	0.215523
ATP8B4	0.947729	0.78537	0.321295	0	0	0	0.239739	0.008527	0	0.064899	0.074227	0.026868	0.112487	0.040356	0	0
ATP9A	0.050035	0.177678	1.17813	0.018878	0.017281	0	0.04946	0.043833	0.094744	0.049087	0.040849	0.040644	0.07487	0.012264	0	0.050289
ATP9B	3.39466	0	0	0	0.110866	0	0.457144	0	0.351594	0	0	0	0	0	0	0
ATPAF1	0.52149	0.707729	1.35599	5.6432	0.855852	0.666915	5.85906	6.17719	3.02591	12.843	5.63873	5.18571	6.28635	4.8016	1.51809	1.12636
ATPAF2	0	0	0.675085	2.2934	0.946073	0.422166	6.47487	4.47313	2.96735	9.21758	4.43878	4.67445	0	3.19563	0.96587	0.952397
ATPSCKMT	0.823979	0.826634	0.825991	0.932268	0.155986	0.149337	0.52732	0.50316	0.445778	1.18117	0.807822	0.585602	1.54785	0.496815	0.205413	0.280846
ATR	0	0	0.827666	0.114259	0.103094	0.058435	0.974211	0.219736	0.243314	0.618937	0.16565	0.301305	1.36602	0.206297	0.079164	0.112677
ATRAID	5.32135	4.64571	7.98498	10.2195	1.33628	1.61836	8.9992	10.7952	8.99049	16.1442	11.3147	10.7874	21.8597	8.94209	4.02058	4.15562
ATRIP	0	0	0.112623	0	0	0.032843	0.542239	0.72256	0.245184	0.846627	0.220586	0.18865	2.5092	0.171381	0	0.095077
ATRN	0.499375	0.489816	1.88587	0.187262	0.12245	0.113555	1.61241	0.552064	0.158551	1.26797	0.642162	0.517993	0.852483	0.395096	0.060404	0.089935
ATRNL1	0	0	0.381618	0	0	0	0.07577	0	0.018973	0.022598	0.023384	0	0	0	0	0.400357
ATRX	0	0	1.73774	0.352762	0.292025	0.352467	0.70834	0.824316	0.107798	0.233249	0.69713	0.773668	1.63349	0.410611	0.131659	0.31458
ATXN1	0.127364	0.356405	0.589028	0.034046	0.364786	0.20875	1.06424	0.113343	0.428806	0.119232	0.170174	0.19181	3.99957	0.158851	0.492566	0.732844
ATXN10	2.04116	1.20659	4.34502	7.15076	1.17057	1.00664	2.93904	5.87338	1.87321	11.8163	4.01817	4.3761	7.81822	4.51455	1.02691	1.04951
ATXN1L	0.231594	0.342697	0.867515	1.21524	2.46315	1.70778	8.26708	2.61717	4.93278	3.21142	6.60304	4.70464	6.19359	2.17442	3.76568	3.98286
ATXN2	0.388376	0.225918	0.840602	0.41219	0.546419	0.459993	1.55571	0.838413	2.00408	1.00137	2.32423	1.88681	5.33187	0.891852	1.41511	1.52094
ATXN2L	2.77894	2.24266	6.20242	10.2227	17.9778	11.6132	66.3459	21.8976	30.9369	29.6345	45.322	36.6491	34.3751	21.3967	24.8807	29.6809
ATXN3	0.162619	1.17628	0.382185	0.68201	1.01127	0.641912	2.75615	1.2284	2.51531	1.2073	3.04299	2.22463	5.53326	0.946029	1.4857	1.8885
ATXN3L	0	0	0	0	0	0	0	0	0	0	0	0	0	0	0	0
ATXN7	0.237066	0.394927	0.389512	1.27628	3.49369	2.22346	5.3103	1.74966	4.34606	1.91755	4.39232	3.11112	3.9534	1.78641	3.42789	3.07555
ATXN7L1	0.232013	0.298969	0.225782	0.028915	0.043992	0.04063	0.163752	0.052473	0.121295	0.164512	0.078531	0.127023	0.243956	0.102773	0.09829	0.13573
ATXN7L2	0	0	0.283358	0	0.424647	0.434427	1.82996	0.330415	0.83196	0.625597	0.396082	0.402734	2.45923	0.509271	0.982307	1.54218
ATXN7L3	1.03992	3.53581	3.20284	3.66084	19.9725	16.2084	42.9741	11.608	23.8202	15.4093	19.3068	14.9582	20.8873	9.3623	18.9908	21.6954
ATXN7L3B	0.58742	1.19752	2.82104	2.38613	0.792178	0.683916	3.88892	3.46567	1.48709	5.56737	4.13642	3.68207	3.68034	2.90659	0.794354	1.0958
AUH	0.33857	0	1.61561	1.59839	2.48909	2.47505	5.19357	2.7857	2.60612	3.0507	5.14269	4.09572	5.9813	1.7963	2.87688	3.04207
AUNIP	1.31304	0	0.922647	2.48751	0.031503	0.078771	1.47271	1.07418	0.026112	2.23867	0.065253	0.154428	0.694989	1.16532	0.0447	0
AUP1	5.46607	33.9218	23.923	20.4316	4.63533	4.72074	26.4702	23.4738	30.7265	42.8906	38.5339	37.3449	44.7936	19.7535	14.1327	16.0125
AURKA	1.02541	3.31514	2.2246	20.4423	3.80985	3.48929	24.8231	24.445	2.37629	49.1171	15.644	12.2626	23.4277	21.0747	3.5972	3.00365
AURKAIP1	10.0002	27.0124	20.0718	41.7444	21.1842	20.2501	44.3172	43.6083	91.7479	71.5568	73.8133	70.9902	142.357	42.807	80.7457	92.4288
AURKB	3.1069	9.08069	8.42218	22.855	1.05905	0.906717	13.6066	15.8132	0.862353	32.7846	4.65763	4.30312	20.5601	16.5308	1.0208	1.38154
AURKC	0	0	0	0.051696	0	0.054205	0.03714	0	0.148516	0.106303	0	0.044273	0	0	0.032108	0.03104
AUTS2	0.29275	0.409518	1.71273	0.029363	0	0	0.046771	0.009468	0.03506	0.015667	0	0.02162	0.085379	0.004349	0.026295	0.199419
AVEN	0.130087	1.02413	2.05972	1.6616	0	0.037884	1.14061	1.88307	0.775061	4.38158	0.821758	0.530639	2.7257	1.26332	0.206443	0.433529
AVIL	0	0	0	0	0.19926	0	1.93191	0.01089	0.371831	0	0.61367	0.077535	1.38485	0.156253	0.133721	0.542619
AVL9	0.640529	1.12702	0.943432	1.1566	0.933478	0.567849	8.97747	3.23172	2.47235	4.78998	4.97115	4.00403	6.10112	1.64168	0.923534	1.05153
AVP	0	0.3815	0	0	0	0	0	0	0.1645	0	0	0	0	0	0	0.183218
AVPI1	0	1.76172	1.96305	1.93652	1.45539	1.14623	4.58244	1.54784	6.12382	1.07325	3.51844	3.3185	3.29452	1.34547	3.88002	3.12186
AVPR1A	0.230829	0	0	0	0.002973	0	0	0.009596	0	0.005909	0	0.004892	0.152451	0	0	0.011007
AVPR1B	0.188247	0.178211	0	0	0	0.003123	0.016546	0	0.012406	0	0.023049	0.024479	0.043312	0	0	0.02754
AVPR2	0.664546	0	0	0	0	0	0.077455	0	0	0	0	0	0	0.019286	0	0.048123
AWAT1	0	0	0	0	0.047045	0	0	0	0	0	0	0	0	0	0	0
AWAT2	0	0	0	0	0	0	0	0	0	0	0	0	0	0	0	0
AXDND1	0	0	0	0	0	0	0	0	0	0	0	0	0	0	0	0
AXIN1	0.718604	3.06982	2.59286	1.57187	2.56544	2.18871	9.85548	4.12015	5.63234	5.17819	8.06227	6.61388	8.70431	3.62431	3.51615	5.53369
AXIN2	0.119582	0	1.09568	0	0.00623	0.003721	0	0	0.014782	0	0	0	0	0	0	0.041019
AXL	0.254944	0.603346	4.70488	0.012171	0.023869	0.010019	0.636903	0.083471	0.165828	0.094841	0.09857	0.045807	0.138911	0.019755	0.051162	0.243005
AZGP1	0	0	0	0.059481	0	0	0.29846	0	0.12837	0.06173	0.196771	0.063249	0	0	0	0.055883
AZI2	0	0	0	0	0	0.080775	0	0	0	0.194516	0.553816	0	0	0	0	0
AZIN1	1.15785	0.963659	3.26096	5.79309	2.11045	2.57211	8.188	9.67364	4.73085	16.7118	12.4392	11.3529	5.55523	7.85656	2.96278	2.53202
AZIN2	0	0.270074	0.280343	0	0.032038	0	0.039589	0	0.005937	0	0.014707	0.017571	0	0	0	0.125192
AZU1	17.7894	45.3138	33.3396	3.13393	0.049005	0.092095	3.08665	3.28098	0.467919	1.38108	0.225544	0.361047	5.91945	3.98542	0.209039	0.42931
B2M	66.0454	70.2534	118.289	111.861	202.374	217.834	418.828	256.792	415.712	360.86	1352.86	1388.19	2922.5	158.661	410.427	412.87
B3GALNT1	0.437244	0	0.796032	0.322117	0.058474	0.029418	1.37632	1.34001	0.399368	1.60149	3.61372	2.5532	1.11024	0.681782	0	0
B3GALNT2	0.655213	0.208153	1.41304	0.346729	0.159058	0.147555	1.26863	0.764345	0.732816	1.56369	0.850014	0.574491	3.04584	0.652104	0.272276	0.426071
B3GALT1	0.439088	1.39329	0	0	0.035889	0.003079	0	0	0.031506	0	0.022845	0	0.051246	0	0.011299	0.099218
B3GALT2	0	0.107502	1.09424	0	0.005396	0.013578	0.011986	0	0.017982	0	0.022248	0.008869	0.075219	0	0.007704	0.039924
B3GALT4	0.784163	1.4136	0.79036	0.283457	0.172712	0.11334	1.74483	1.33348	0.73747	0.805108	1.51397	1.89852	2.21371	0.672246	0.245566	0.409536
B3GALT5	0.046385	0.082379	0.049455	0	0.001372	0	0	0	0	0	0	0.00226	0	0	0.001963	0.025414
B3GALT6	0.938539	3.02424	2.23015	1.00374	0.481409	0.280617	2.69342	2.17299	5.16908	2.823	1.4357	1.29465	4.31805	1.35001	1.83114	3.49483
B3GALT9	0	0	0.106216	0.116809	0.050834	0.042448	0.393085	0.205025	0.042199	0.376919	0.18188	0.208018	0.35066	0.104916	0.036131	0.023435
B3GAT1	0	0	0.241754	0	0.005439	0	0	0	0	0	0	0	0	0	0	0
B3GAT2	0.099609	0	0.173456	0.190139	0.044809	0.048907	0.358559	0.199194	0.217528	0.40035	0.590806	0.355406	1.27679	0.195727	0.075467	0.12401
B3GAT3	2.44498	7.59786	15.4602	3.27675	0.68701	0.62259	8.6451	6.46976	9.1964	10.4238	8.74889	6.05169	34.533	4.40703	3.8757	4.9599
B3GLCT	0.332583	0.983743	0.896521	0.706616	1.27801	1.05227	1.85393	0.875723	0.493349	1.09548	0.962384	0.789035	2.50349	0.512079	0.550905	0.506129
B3GNT2	0.334247	0.705772	1.79597	10.6277	4.92037	4.12857	15.641	15.9491	4.33803	21.6997	8.67737	7.81121	9.54395	11.7888	2.9874	3.56946
B3GNT3	0	2.09756	0	0	0	0	0.065695	0	0.09915	0	0.120782	0	0	0	0.084736	0.275673
B3GNT4	1.31972	0.328354	0.278518	0.061541	0.20448	0.084566	0.454962	0.048333	1.02489	0.173384	0.369904	0.215703	1.7248	0.053297	0.756698	0.880865
B3GNT5	0.823449	0	1.30553	0.493617	0.165932	0.158579	0.993684	1.1828	0.668405	2.67293	2.30131	2.12973	3.11952	0.60261	0.23702	0.17056
B3GNT6	0	0	0	0	0	0	0	0	0	0	0	0	0	0	0	0
B3GNT7	0.546765	1.76785	0.48099	0.736881	0.075756	0.086231	8.46219	6.65446	0.811431	9.08828	9.67111	9.26721	3.36896	6.54372	0.302419	0.332271
B3GNT8	1.1077	3.27162	0.429623	1.87378	1.27862	1.04113	10.2408	3.45011	1.79489	1.70152	2.23529	1.37252	6.42747	3.49599	1.06655	1.32209
B3GNT9	0.537889	3.32059	2.16148	0.062211	0.080128	0.05213	0.522841	0.050013	0.581075	0.283099	1.01709	0.770226	2.15173	0.061785	0.20589	0.8026
B3GNTL1	0	0	0	0.0357	0	0	0	0.018802	0	0.161394	0	0	0	0.027226	0	0
B4GALNT1	0.245931	0.360337	0.026972	0	0.024293	0	0.015439	0	0	0.006896	0	0.01713	0.040422	0.01149	0	0.08766
B4GALNT2	0.420402	1.17384	0	0	0	0	0	0	0	0	0	0	0	0	0	0
B4GALNT3	0.21766	0.40672	0.207274	0.005192	0.010183	0	0.143472	0.016437	0	0	0.049095	0.027928	0.126535	0.011239	0.067932	0.175942
B4GALNT4	0.171264	0	1.31299	0	0	0	0.011294	0	0.016942	0.020185	0	0.016712	0.389874	0	0.021777	0
B4GALT1	0	0	4.98524	0.235503	1.48113	1.3291	11.535	1.78072	2.80526	2.62283	4.73552	4.31959	0.737654	1.29149	0.674821	2.0602
B4GALT2	0	0	0	0	0.363035	0.139956	0	0	0	0	0	0.275123	0	0	0.248491	3.18786
B4GALT3	0.53442	0.47493	4.80961	23.2685	93.6027	82.4319	89.6351	50.4422	75.9741	38.4248	63.6782	58.2205	42.336	39.0311	73.4311	77.475
B4GALT4	0	0	0.776572	0.474715	0.248873	0.252159	1.18815	0.505726	0.694284	1.51748	1.8266	1.36114	5.17493	0.749397	0.351413	0.119027
B4GALT5	1.64858	1.88732	3.88323	8.53472	7.18456	6.51152	39.7177	21.646	15.9347	22.3338	26.8631	24.1526	11.0357	14.3061	7.30804	8.14844
B4GALT6	0.164092	0	0.435137	0	0.052245	0.03711	0.110121	0.162161	0.067008	0	0.348505	0.209856	0	0.113086	0.051684	0
B4GALT7	0.443465	5.3804	5.74873	1.19469	1.23093	1.22876	3.28069	1.65572	8.21733	3.5407	4.56844	5.45266	6.65892	2.06487	5.46979	6.92585
B4GAT1	0.750784	2.62114	3.90957	0.29616	0.010179	0	0.225314	0.394183	0	0.725573	0.125227	0.033371	0.328851	0.252291	0.057968	0.244275
B9D1	0	0.905584	0.660603	2.2993	1.03588	0.514238	2.03667	2.62199	0.756306	3.10269	2.98111	2.65442	2.87355	2.76026	0.965918	1.16331
B9D2	0	0.579344	0.555433	0.884893	1.57483	1.50505	5.55408	1.76316	2.53813	3.36838	3.28905	1.6824	2.73655	1.39148	1.76912	2.43202
BAALC	0	2.38044	2.19934	0	0.014788	0	0.032798	0.059657	0.024615	0.014662	0	0.036416	0.068514	0	0	0.013664
BAAT	0	0	0	0	0	0	0.013961	0.026688	0.018368	0.051829	0.038812	0.045297	0.112483	0	0.051305	0
BABAM1	1.04262	11.0587	9.17773	29.1626	10.9007	9.60421	29.3772	33.8073	16.0368	50.6616	33.4051	39.2119	51.0329	26.9804	11.8757	10.0976
BABAM2	0.673337	0	0	0	0.321439	0.152459	1.40278	1.34232	0.834281	0.601776	0.642663	0.644656	1.3622	0.414093	0	0.363746
BACE1	0.255696	0.37502	0	0.12773	0.140996	0.111106	0.72502	0.191915	0.485501	0.287975	0.3917	0.460295	0	0.186583	0.248772	0
BACE2	0.186322	0.991466	2.81021	0.127183	0.228527	0.278539	0.476313	0.122929	0.368955	0.384601	1.64201	1.51251	1.46086	0.160341	0.286467	0.422414
BACH1	0	0	5.11651	1.21752	10.8054	7.12203	31.3025	11.4061	11.012	10.6386	11.8167	20.8722	13.3687	10.5271	8.3092	8.04416
BACH2	0	0.071226	0.170105	0.045376	0.029672	0.005041	1.4977	0.367194	0.039618	0.687596	0.208778	0.179165	0.969755	0.137598	0.02547	0.06595
BAD	3.30727	1.16987	7.79082	9.64351	5.44126	6.82969	10.365	9.9546	10.3263	11.4652	15.3376	14.2045	19.1598	9.69407	9.66526	8.9385
BAG1	0.700446	1.49602	1.00122	6.41361	27.8255	28.0038	13.3669	8.53434	25.7709	8.62068	15.0325	15.1393	7.779	6.46739	28.2331	30.302
BAG2	0.131086	0.299229	1.72777	0.645494	1.68078	1.08893	1.78987	0.729263	0.959423	1.69415	1.04871	0.732109	2.3585	0.626734	1.13109	1.29059
BAG3	1.14144	0.153354	4.74331	4.1356	3.07237	2.09482	19.9591	8.24645	6.50085	23.2328	25.1566	21.2749	13.1738	6.77764	4.56755	5.46318
BAG4	0.318757	0.669551	0.676603	1.22999	0.560127	0.627379	1.70717	1.46644	1.3349	2.48956	2.12262	1.95712	1.65742	0.960315	0.496398	0.760711
BAG5	0.778924	0.722015	1.60253	2.08402	1.43932	1.36989	4.36466	3.99395	5.35832	5.87228	6.26255	5.25465	7.73274	3.35081	2.76636	2.89893
BAG6	0.68594	0	1.7351	2.65686	0.781987	1.86621	3.42994	2.5204	3.098	4.38053	1.99434	1.4892	16.0481	3.1048	3.24744	5.60672
BAHCC1	0.478016	2.28922	1.97142	0.005176	0	0	0.011308	0.002732	0.014124	0	0.01051	0.011149	0.104757	0.02803	0	0.040754
BAHD1	0.660296	0.733484	1.04263	1.83354	0.3396	0.439354	5.90766	3.01784	1.87188	4.71474	3.8194	3.11508	5.05932	2.03684	0.844939	0.89467
BAIAP2	1.17154	0.335567	1.23851	0.097853	0.1695	0.053144	2.81297	0.61533	0.545795	1.6357	1.71514	1.13833	2.11568	0.577565	0.060313	0.113198
BAIAP2L1	0	0	0.618422	0.008019	0.188739	0.105553	0.281461	0.008459	0.235871	0.020811	0.140485	0.172306	0.377735	0.0694	0.16467	0.252065
BAIAP2L2	0	0	0	0.169762	0.520468	0.367764	0.577867	0.089421	2.01347	0.108167	1.22134	0.945229	0.681536	0.164141	2.65582	3.04054
BAIAP3	0	0	0.194378	0.01883	0.102424	0.10335	1.05222	0.059593	0.533709	0.090389	0.31354	0.202727	4.03579	0.129135	0.235737	0.446668
BAK1	2.16968	4.73149	1.79851	0.362463	0.245854	0.175262	1.75486	1.17542	0.318029	2.95848	2.26178	1.73244	4.71376	0.737448	0.246463	0.924875
BAMBI	0	0	0.970334	0.038114	0.149287	0.083119	0.437602	0.140493	0	0.172211	1.66597	1.39766	0.249012	0.082169	0.884365	0.573573
BANF1	12.4166	25.1794	25.4585	63.509	21.155	21.5896	50.3957	59.4888	107.951	116.932	129.09	119.94	153.722	54.8553	88.7241	105.987
BANF2	0	0	0	0	0	0	0	0	0	0	0	0	0	0	0	0.318787
BANK1	0	0	0	0.008267	0	0	0.024002	0.00872	0	0.032176	0	0	0	0.017879	0	0
BANP	0	0	0	0	0.094214	0	0	0	0	0	0	0.075632	0	0	0.065609	0.085634
BAP1	1.09151	3.48613	5.52855	18.618	9.60159	7.79689	49.2418	35.4695	22.7043	53.9119	50.3135	43.0251	51.1288	37.8281	15.3754	16.3897
BARD1	0.343936	0.244218	0.339437	1.18474	0.200429	0.154048	1.29657	1.42011	0.209634	2.03468	0.697604	0.536622	1.50308	1.1754	0.155392	0.197022
BARHL1	1.1587	0	0.270766	0	0.010807	0	0	0.034874	0.053878	0	0.044286	0	0	0	0	0.139609
BARHL2	0.133689	0.710909	0	0	0	0	0	0	0.01657	0	0	0	0	0	0.014192	0.257606
BARX1	0.447218	1.71494	0	0	0.08391	0.041936	0.073933	0	0.361485	0.033109	0.30739	0.301468	0	0	0.214181	0.185362
BARX2	0	0.128418	0	0	0	0	0	0	0	0	0	0	0	0	0	0.099781
BASP1	0	0	0.762696	0	0	0	0	0	0	0.489313	0	0	0	0	0	0
BATF	1.4018	3.09022	5.13377	0.252927	0.109816	0	0.360016	0	0	0.32309	0	0	0.556109	0	0.038684	0.050316
BATF2	0	0	0.14656	0	0.042123	0	0.380725	0.084954	0.142042	0.145925	0.107915	0.120807	4.24412	0	0	0.249788
BATF3	0	0	0	0	0	0	0	0	0.051295	0	0	0	0.41925	0	0	0
BAX	9.65457	22.2933	33.3406	31.2169	47.1179	42.0237	88.5339	55.4587	190.49	89.0974	206.038	165.383	158.842	51.048	163.365	184.265
BAZ1A	3.57578	11.0433	9.20171	2.27042	1.5751	1.45892	8.18928	3.17913	2.55351	7.34308	4.14516	3.62472	13.4942	3.00921	1.56045	1.60795
BAZ1B	0.623368	0.737257	3.4273	2.90752	0.983448	0.818683	11.5616	5.36598	3.12363	9.76215	7.10568	6.24059	7.79061	5.19027	1.4064	1.44633
BAZ2A	0.489775	0.791819	2.21138	3.70202	11.5485	7.60957	34.0209	8.40123	18.1215	8.54027	24.296	18.4085	20.7252	8.09814	13.4051	15.9824
BAZ2B	0.18978	0.5841	0.629442	0.161499	0.728094	0.580155	2.32093	0.566515	1.23057	0.725877	2.08698	1.53187	4.63062	0.502112	0.648132	0.796165
BBC3	1.74243	1.26758	3.45872	24.6206	147.851	135.544	203.795	65.7207	281.355	50.3819	242.367	210.537	141.05	72.5672	240.453	295.683
BBIP1	0.237431	0.574024	1.22449	2.53361	0.860013	1.07761	2.2871	3.31659	2.86798	4.39113	4.38172	4.01699	8.85543	2.28079	1.73234	2.03151
BBOF1	0.12563	0	0	4.53188	8.66031	8.30868	7.54436	4.92063	5.87526	4.51825	7.14987	6.68447	7.75953	4.12686	6.90732	5.8873
BBOX1	0	0	0	0	0	0	0	0	0	0	0	0	0	0	0	0
BBS1	0	0	0	0	0	0	0	0	0.091117	0	0	0	0	0	0	0.101523
BBS10	0.361323	0	0.50655	0.566265	0.343268	0.332904	1.13184	1.02143	0.420033	1.53326	1.20523	1.13723	1.83178	0.709956	0.352265	0.267855
BBS12	0.226134	0	0.031091	1.11313	1.39338	1.28117	3.25615	2.15842	1.60355	4.60959	5.59358	5.37991	5.31562	1.43503	1.63766	0.962485
BBS2	0.207094	0	0.632702	0	0.047821	0.013024	0.302127	0.063789	0.275553	0.332653	0.382991	0.63311	0.094266	0.030037	0.205921	0.203016
BBS4	0	0.740974	0	1.01752	0.520045	0.357786	1.54614	1.3614	1.09814	2.98917	1.75291	1.14564	4.7423	1.10421	0.871202	0.584197
BBS5	0.582144	0.967247	0.363808	0.135658	0.074736	0.035798	0.664655	0.137902	0.138966	0.46356	0.089887	0.143602	0.59281	0.082505	0.06415	0.786838
BBS7	0.083485	0	0.908269	0.606499	1.23877	0.985238	6.08856	1.3595	2.22964	1.75133	5.18146	3.33182	5.37926	1.00855	1.22423	1.47582
BBS9	0.292116	0	0	0	0.049598	0.015592	0	0.059832	0.061955	0.242251	0.089382	0	0.575465	0.102554	0	0.011463
BBX	0.179519	0	1.21861	0.321837	0.964393	0.784766	1.6288	0.827809	0.555828	1.56851	1.94914	1.31894	2.31792	0.61248	0.476457	0.499537
BCAM	0.360329	0	2.89147	3.7793	0.883306	0.740757	1.36195	2.14284	2.43693	1.06089	2.69145	3.06042	0.653315	4.50518	1.81458	1.78968
BCAN	0	0	0	0	0	0	0	0	0	0	0	0	0	0	0	0
BCAP29	0	0	3.48038	7.03507	3.81803	3.94996	10.9689	9.56385	29.3528	13.1132	36.0648	33.1298	25.5255	7.59204	15.1289	14.0192
BCAP31	5.2842	11.7599	13.3065	6.71075	4.09445	4.46493	21.7555	16.7617	26.7707	29.8581	36.1604	28.1727	33.6308	10.3695	13.4121	14.3291
BCAR1	0.175595	0	1.54858	0.287381	0.970799	1.09872	9.74113	1.64352	7.83127	1.79895	4.24769	2.84596	1.43087	0.735252	2.16235	2.64488
BCAR3	0	0	2.07981	0.046579	2.0075	1.73121	1.51572	0.414822	4.987	0.260982	4.64052	3.57131	0.611606	0.474666	3.98028	4.48658
BCAS1	0.609886	1.1738	0.093073	0	0.015143	0	0.094344	0	0.005468	0	0.05008	0.004984	0	0.010029	0.024624	0.123355
BCAS2	2.16534	2.00213	4.90787	9.6168	3.43091	2.27948	9.82061	12.1089	15.422	22.8515	15.4264	13.379	22.4458	9.0067	10.1109	11.2923
BCAS3	0	0	0	0	0	0	0	0	0.284545	0	0.194162	0	0.356928	0	0	0
BCAS4	0	0	0.266961	0.024446	0	0	0	0.178128	0.16838	0.117655	0	0.07818	0.073018	0.105243	0.104338	0.431309
BCAT1	0.34306	0.349312	2.43183	2.42646	0.12717	0.13542	10.7997	8.05619	0.381379	12.0842	1.9921	1.37681	3.3623	3.4736	0.07113	0.091405
BCAT2	1.99562	6.92411	5.9564	0.729971	0.254618	0.205543	3.22899	0.908222	1.71729	3.28576	1.36253	0.577178	10.866	0.872278	0.594007	1.18304
BCCIP	1.88988	0.93479	5.16899	21.5551	2.41706	3.84836	14.6564	21.0765	17.2034	48.3798	18.0412	17.1906	36.507	15.2387	9.61848	10.2809
BCDIN3D	0.829472	2.60974	0.798105	0.331644	0.058521	0.024124	0.412685	0.413214	0.274532	1.17461	0.314781	0.337047	2.07023	0.366411	0.070859	0.376304
BCHE	0	0	0.138212	0	0	0	0	0	0	0	0	0	0	0	0	0
BCKDHA	3.35681	2.99081	4.11163	4.1391	1.26069	1.11188	14.136	7.2931	8.78203	17.58	12.1942	11.7919	6.10651	5.15403	4.65269	6.23982
BCKDHB	0.243605	0	1.04916	0.516058	0	0.030678	0.485467	1.02117	0.366962	1.30932	0.148358	0.060191	0	0.489017	0.052231	0.612497
BCKDK	0.59264	4.0961	7.52869	2.50757	1.01391	0.945695	4.96285	4.33154	2.97041	6.76668	4.36118	3.78049	2.16121	2.42183	1.87584	1.9043
BCL10	0.023209	0	0.882292	1.63702	1.29044	0.976425	3.04056	2.05986	3.13333	3.53143	4.44194	3.71522	3.3115	1.38095	1.89982	1.94616
BCL11A	0	0	0.141841	0.471017	0.168586	0.201959	0.594756	0.590448	0.332782	0.60337	1.06278	0.747599	0.986291	0.550635	0.314004	0.392155
BCL11B	0.105961	1.06131	0.033472	0	0.014477	0.002027	0	0	0.012079	0	0	0.03178	0.039405	0	0.013805	0.058089
BCL2	0	0	0	0	0	0	0	0	0	0	0	0	0	0	0	0
BCL2A1	0.536979	0	0.643582	0	0	0	0.712696	0	0.10763	0	0.065451	0.052979	6.44232	0.107473	0	0.059862
BCL2L1	2.88427	4.93999	7.26949	173.22	269.743	263.378	301.929	220.284	231.503	172.004	317.865	288.978	191.51	261.491	211.22	254.734
BCL2L10	0	0	0	0	0	0	0	0	0	0	0.03668	0	0	0	0	0.132831
BCL2L11	0	0	0	1.34863	2.15602	1.27998	19.6935	4.03147	3.75111	3.5966	9.34849	6.38026	3.58668	3.71893	1.45132	2.74147
BCL2L12	0	0	0.203669	0.035723	0.020748	0.101045	0.295751	0.127267	0.271753	0.337819	0.206925	0.259068	0.322898	0.215259	0.494931	0.229028
BCL2L13	0	0	0.532473	2.57938	2.06672	1.25763	6.74736	3.5815	4.46791	8.05327	5.3227	5.92641	3.76569	2.73016	1.91383	2.59635
BCL2L14	0	0	0	0	0.078329	0	0.02475	0	0	0	0	0	0.464121	0	0	0.103235
BCL2L15	0	0	0	0.06287	0.003736	0.015685	0.982395	0.852775	0.043614	4.32022	0.438894	0.485506	1.3309	0.579577	0	0.041493
BCL2L2	1.61388	0	0	0	0	0.051262	0.294296	0.101764	0.211085	0	0.244764	0.209914	0	0	0.174576	0.342716
BCL2L2-PABPN1	0.481917	2.30202	0	0.234415	0.212889	0	2.5955	0.603865	0.458815	0.700953	0.187838	0.393286	3.9776	0.432536	0	0
BCL3	2.75664	5.74745	2.63417	0.117946	1.01941	0.800503	8.83946	2.7514	3.71079	1.67161	1.05083	1.20024	12.0321	0.962885	2.01426	2.43398
BCL6	0	1.26093	0.751645	0.573923	7.76879	4.43867	34.9049	3.00651	12.7218	3.87452	17.4177	10.2514	102.559	4.89163	10.955	13.4569
BCL6-AS1	0	0.949459	0	0.031001	0.444684	0.252028	5.81802	0.131599	0.869322	0.318426	2.66369	1.64728	1.33379	0.46623	0.543491	0.928925
BCL6B	0	0.324569	0	0.02493	0.027155	0.004555	0.024127	0	0.009049	0	0	0	0	0	0.015508	0.030135
BCL7A	0.599651	0.895909	0.607878	0.737988	1.01533	0.83545	1.44256	0.774018	2.29775	1.11798	1.46859	1.2273	1.36635	0.704712	1.70993	2.11284
BCL7B	0	0.737209	5.42668	9.52624	5.104	6.65941	21.7118	15.711	29.7455	24.4874	36.362	36.2742	16.957	12.3596	14.516	21.6342
BCL7C	0.351464	0	4.39149	1.3289	0.074409	0.103834	1.66764	1.01392	1.33435	2.65465	1.08724	1.20744	1.28167	0.915766	0.365299	0.641492
BCL9	0.143019	0	0.806148	0.023141	0.006052	0.007625	0.653113	0.102566	0.06562	0.216529	0.056292	0.079682	0.141069	0.05511	0.004326	0.089636
BCL9L	0.189897	0.610955	1.77468	0.027795	0.065111	0.036185	0.246932	0.070415	0.100116	0.043383	0.06772	0.083818	0.161278	0.039136	0.059241	0.10338
BCLAF1	0.932087	0.861817	3.75263	3.34361	4.35831	2.99346	10.6267	5.80823	7.58921	12.262	8.68381	7.02899	11.9487	4.59268	5.34528	5.77442
BCLAF3	0.066827	0.372886	0.213767	0.026507	0.104608	0.088486	0.634695	0.13234	0.490192	0.085766	0.761629	0.472603	1.68833	0.143668	0.218312	0.26604
BCO1	0	0	0	0	0	0	0	0	0.013629	0	0	0	0	0	0	0
BCO2	0	0	0	0	0	0	0	0	0.064267	0.026661	0	0	0	0	0	0
BCOR	0.264623	0.939469	0.898562	0.816716	0.98867	0.917572	8.64525	2.8672	1.83102	4.60328	5.12344	4.73806	1.79954	2.50578	0.685277	0.761278
BCORL1	0.275868	0	0	0	0.176987	0	0	0	0	0	0	0	0	0	0	0.158168
BCR	1.50586	1.42168	2.78882	0.067078	0.019931	0.003346	0.221594	0.025735	0.292447	0.118792	0.189307	0.208708	1.47462	0.026393	0.062658	0.287716
BCS1L	0	2.03855	1.29934	0.203106	0.06608	0	1.51029	0.745398	0.162926	1.87359	0.198119	0.106928	0.295443	0.54233	0.185601	0.060413
BDH1	0.437152	1.96407	1.28234	0.172777	0.005431	0	0.233633	0.121622	0.027147	0.662288	0	0	0.331295	0.14953	0	0.083991
BDH2	0.516407	0.348032	0.953573	0.163432	0.009415	0.006271	0.072356	0.086167	0	0.158883	0.015161	0.065772	0.403027	0.038231	0.033333	0.041162
BDKRB1	0	0	1.48287	0	0	0.014274	0	0.055289	0	0.033807	0	0	0	0	0	0
BDKRB2	0	0.172107	1.00802	0.004116	0.02691	0.002261	0.011979	0.017374	0.00449	0.00535	0.005564	0.008859	0.018827	0.008912	0.015393	0.054811
BDNF	0	0	0	0	0	0	0	0	0.048442	0	0	0	0.907142	0	0	0
BDP1	0.361127	0.365247	0.659758	0.101301	0.315789	0.21114	2.49699	0.391059	0.595542	0.708481	1.43752	1.07781	1.68862	0.392562	0.376755	0.363978
BEAN1	0.609184	0.453584	0	0	0	0	0	0	0	0	0	0	0	0	0	0
BECN1	1.09321	2.11211	3.58911	9.45334	10.8189	9.7194	17.6891	16.6276	17.4788	19.5922	25.0089	20.3301	23.7103	13.2899	13.8997	15.1797
BECN2	0.229387	1.15017	0	0	0	0	0	0	0	0	0	0	0	0.0284	0	0.316997
BEGAIN	0.30164	2.67484	0.311847	0	0.007478	0	0.073955	0	0	0.059313	0	0.042023	0.339993	0.024731	0.095972	0.173163
BEND2	0	0.24378	0	0	0	0	0	0.013146	0	0.00809	0	0	0	0.006741	0.017457	0
BEND3	0.619081	0.709841	0.087446	0.035053	0.042972	0.014439	0.44627	0.064736	0.043013	0.307523	0.260596	0.07073	0.30725	0.033204	0.028675	0.222779
BEND4	0.500806	0.550504	0.064609	0	0.002117	0	0.018858	0.010253	0.038868	0.101055	0.004381	0.003486	0.039534	0.003506	0.021202	0.113722
BEND5	0	0	0	0	0	0	0	0	0.041256	0	0	0	0	0	0	0
BEND6	0.465544	1.10082	0.217401	0	0.046176	0	0	0	0	0.015258	0	0	0	0	0	0.056884
BEND7	0	0	0	0	0.015225	0	0	0	0.035813	0	0	0.019425	0.210802	0	0.032602	0.053648
BEST1	0	0.807523	0	0.247353	0.895112	0.760015	2.43153	0.373851	1.82496	0.142803	1.6064	1.1627	2.64109	0.699586	2.71767	2.68921
BEST2	0	1.06312	0	0.042457	0.157142	0.154697	0.348062	0	0.199844	0	0.113836	0.121279	1.36692	0.076387	0.329178	0.597438
BEST3	0	0	0	0	0.085824	0.080336	0.037743	0.069206	0.094926	0	0.146055	0.117002	0.032808	0.047201	0.020347	0.105409
BEST4	0.265041	0.344679	0	0	0.031552	0.046242	0.034979	0	0.091889	0	0.048646	0.064733	0.931312	0	0.056227	0.320643
BET1	1.55907	1.26531	2.31327	3.62313	2.00551	2.34349	4.05272	3.90828	5.50851	6.22529	9.69898	9.37458	9.63729	3.2515	5.0153	4.30569
BET1L	0	0	0	0.591573	0.240005	0.784908	4.64416	1.23658	5.95526	5.6792	6.70188	6.84732	5.54438	1.25529	4.00918	3.90117
BEX1	2.42352	2.33103	1.51067	28.5101	0.974527	1.63491	202.756	282.666	34.5686	629.442	136.938	112.254	892.747	150.065	2.26451	2.64152
BEX2	0	1.42888	3.54374	0.898963	2.8026	2.28946	2.55161	2.23361	12.4672	3.256	20.0559	21.1569	44.1292	2.27635	5.88999	6.20024
BEX3	1.81048	9.6969	17.4661	1.47541	0.082362	0	0.060003	0.398292	0.045251	0.915423	0	0.089129	0.74214	0.496508	0.077369	0.352212
BEX4	2.88057	4.13171	4.30673	4.62743	1.93331	2.20344	2.68928	1.9968	8.06391	3.01089	11.5946	10.1908	18.7228	2.62888	5.12184	4.74499
BEX5	0	0	0	0	0	0	0	0	0	0	0	0	0	0	0	0
BFAR	2.26055	1.00314	3.35136	1.377	0.612984	0.391804	5.20405	3.28976	1.44169	6.07742	3.29407	3.31038	4.54062	1.44174	0.525375	0.596708
BFSP1	0	0	0	0.264196	0.018165	0	0.241432	0.249135	0.015106	0.305888	0.03729	0	0.125942	0.045034	0	0.050319
BFSP2	0	0	0	0	0	0	0	0	0	0	0	0	0	0	0	0
BGLAP	0	0	2.93442	0	0	0.065043	0	0	0.874858	0	0.322204	0	0	0	0.236486	1.12376
BGN	0	0	6.3752	0	0	0	0	0	0	0	0	0	0	0	0	0
BHLHA15	0.258729	0.539429	0	0	0.055967	0	0.118541	0	0.255702	0.023465	0.643173	0.393302	0.160083	0.01964	0.170447	0.325923
BHLHA9	0.962255	1.51407	0	0	0	0.013364	0	0	0	0	0	0	0	0	0.022751	0.620151
BHLHB9	0	0	0.424418	0.021921	0.53864	0.436803	0.148586	0.03854	0.278568	0.142261	0.295568	0.157049	0	0.047421	0.327422	0.291206
BHLHE22	0.298434	0	0	0	0.00591	0	0.026245	0	0	0.011729	0	0	0.082318	0	0	0.010928
BHLHE23	0	1.43559	0	0	0.022997	0	0	0	0.113968	0	0	0	0	0.037859	0.064982	0.422266
BHLHE40	0.351167	0.21988	2.64324	0.122094	0.078487	0.036017	5.36755	0.764868	6.25162	0.962106	4.20924	2.69913	3.27956	0.523285	0.902143	0.904631
BHLHE41	0	0	0.155613	0	0	0	0.011316	0	0.016976	0	0	0.050238	0.248598	0	0	0.04711
BHMT	0	0	0	0	0	0	0	0	0.062423	0	0	0	0	0	0	0.087429
BHMT2	0	0	0	0	0	0	0	0	0	0	0	0	0	0	0	0
BICC1	0	0.439219	1.57064	0	0	0	0	0	0.010788	0	0	0	0.022608	0	0.041608	0.095787
BICD1	0.280193	1.2415	0.174517	0.192027	0.125398	0.052427	0.596696	0.539535	0.191053	0.963603	0.428386	0.53092	1.62659	0.189915	0.074373	0.597913
BICD2	0.505641	1.24513	2.98111	0.365719	0.291745	0.166666	2.16227	0.765167	1.27011	1.40065	1.49748	0.893107	1.17894	0.630448	0.50372	0.382436
BICDL1	0	1.22236	0.476504	0.009719	0	0.005324	0.126875	0	0.148078	0.012601	0.026156	0.062597	0.088407	0	0.009062	0.28181
BICDL2	0.471065	0	0	0	0	0	0.044429	0	0.033365	0	0	0	0.115805	0	0	0
BICRA	0.231608	0.342247	1.03251	0.186339	0.495885	0.268973	3.37769	0.785376	1.28682	1.02024	2.32421	1.23555	4.58094	0.929113	0.917623	1.07436
BICRAL	0.191484	0.634595	0.574367	1.25764	3.57545	2.50572	6.51198	2.74596	4.04439	2.97047	6.26659	5.1991	3.99974	1.98121	2.49755	3.06071
BID	0.640918	1.07234	1.27526	0.981905	0.278192	0.232596	2.31602	1.38456	1.0317	3.58202	0.996613	0.571386	3.61886	1.2936	0.589204	0.469945
BIK	0	0	0	0.119398	0	0.107385	0.22691	0.125388	0.128297	0.152682	0	0	0.117052	0	0	0.047546
BIN1	0	2.22055	6.78472	0.017335	0	0	0	0.056439	0	0.089587	0	0	0.365073	0.112175	0	0
BIN2	1.76533	0	0	0.202615	0	0	1.35094	0.401292	0	0.755155	0	0.336073	0.757636	0.294539	0	0
BIN3	0	1.51472	1.60421	1.23425	1.20394	1.21307	3.03283	1.91724	2.42837	3.27258	2.96773	3.37324	9.3052	1.72039	2.15223	2.73658
BIRC2	0	0	0.853678	0.34679	1.36721	2.11957	2.61096	1.44129	0.521748	1.15878	2.49336	2.39672	2.24264	1.57555	1.14033	1.26669
BIRC3	0.043944	0	0.313633	0.007224	0.79069	0.627143	0.193152	0.042071	0.123121	0.094922	0.322798	0.328662	0.737884	0.00719	0.14896	0.273325
BIRC5	1.99752	4.40698	5.31025	27.7063	1.28371	1.52893	12.2775	21.009	0.412322	44.8175	5.3285	4.55593	11.2799	18.9018	1.11466	1.27345
BIRC6	0.197784	0.225004	1.08742	0.368177	0.695989	0.479203	4.65426	1.01058	1.47988	1.53314	2.76227	1.84944	3.38739	0.841454	0.840314	1.0495
BIRC7	0	0.739994	0	0	0.017123	0	0	0	0	0	0	0	0	0	0	0.126068
BIVM	0	0	0	0	0	0	0	0	0	0	0.079076	0	0	0	0	0
BIVM-ERCC5	0.53223	0.432712	1.34962	0.128572	0.017943	0	0.486159	0.131247	0	1.02627	0.051081	0	0.954697	0.210066	0.078014	0.013949
BLACAT1	0	0.217251	0.031757	0	0.005722	0	0.006367	0	0	0	0	0	0	0	0.012273	0.047677
BLCAP	1.91361	2.57865	6.96588	5.67256	2.22275	1.90932	6.27254	6.81739	9.87038	9.27854	9.91728	7.96054	13.727	6.03864	6.64313	7.26397
BLID	0	0	0	0	0	0	0	0	0.047967	0	0	0	0	0	0	0
BLK	0.219855	0	0	0	0.018722	0	0	0	0.062267	0	0	0	0	0	0.013333	0.069142
BLM	0.221978	0.139621	0.044803	0.781302	0	0.030469	2.05976	0.972533	0.021016	2.21679	0.23608	0.292844	1.75989	1.04431	0.030699	0.053789
BLMH	3.02441	1.29923	3.69442	2.81803	0.303847	0.152604	4.67879	3.48807	0.343961	11.4399	1.10841	1.36966	4.67892	2.49802	0.140055	0.176726
BLNK	0.366023	0.39843	0.072341	0.033215	0.013027	0	0	0.007008	0.028956	0	0	0	0.060618	0	0.012407	0.01607
BLOC1S1	8.72225	16.3893	15.1058	69.1624	72.4367	90.0038	90.1938	84.2637	152.945	111.653	173.236	172.727	202.152	78.3631	121.451	125.258
BLOC1S2	0.729157	0.542749	2.03412	5.27886	6.89711	7.31707	9.14214	8.49637	20.1316	13.2417	24.1713	21.6621	34.5689	6.48567	18.4488	16.9014
BLOC1S3	0.466954	2.23897	1.03022	2.17414	1.37407	1.13146	6.47045	3.62495	6.21821	5.58627	6.20582	5.58798	8.86598	2.97399	3.32386	4.74997
BLOC1S4	2.17476	1.6545	2.46178	3.2607	5.39948	4.98684	11.1152	6.07137	12.7506	4.60373	8.71349	7.7877	4.7148	5.44669	9.04457	9.84262
BLOC1S5	0	0	1.23483	2.02831	0.44502	0.53334	2.32789	2.01142	1.98805	4.17002	2.61807	2.08854	4.63046	1.26875	0.770657	0.581796
BLOC1S6	0	0	0.830221	0.319126	1.44963	1.22258	4.83334	2.73548	2.06486	3.44251	4.22645	3.89303	3.32007	1.9046	1.15169	1.72584
BLVRA	1.82041	3.51856	6.51192	39.6933	1.3361	1.82285	40.4268	49.3101	15.0131	74.7361	26.0335	23.5243	136.083	33.7326	3.04193	3.26888
BLVRB	0	0	0	36.2566	13.0286	12.3638	41.8365	36.5415	20.6606	61.4923	27.9766	23.5835	63.9499	43.444	18.2	22.2718
BLZF1	0	0	0.625507	0.475714	0.448232	0.502464	1.78421	1.52933	1.71352	3.33231	3.54188	3.43387	3.30876	0.795975	0.830971	0.444225
BMERB1	0	0.39748	1.93037	0.290602	1.03364	1.04938	0.592507	0.414191	1.40132	0.92769	2.49177	2.3445	0.900216	0.424056	1.19108	1.07095
BMF	1.01202	0.878176	1.84373	0.53857	1.03137	0.852645	3.38699	1.18805	3.44199	0.898126	1.82554	1.28984	7.24533	1.33104	2.21316	2.77428
BMI1	0.929218	0.905207	0.827835	2.39206	1.57938	1.52803	5.16246	3.76272	3.56987	6.32496	5.47564	5.65507	10.0567	2.57592	1.95125	1.9473
BMP1	0	0	2.24633	0	0	0.068848	0.260649	0.18234	0.126026	0.138527	0.269352	0	0	0	0	0.228207
BMP10	0	0	0	0	0	0	0	0	0	0	0	0	0	0	0	0.005681
BMP15	0	0	0	0	0	0	0	0	0	0	0	0	0	0	0	0
BMP2	0	0.817755	0.150033	0	0.027006	0	0.011997	0.008717	0	0.171554	0.033403	0.044387	0	0.017873	0.007712	0.10989
BMP2K	0.535918	0.822387	0.961327	12.4765	24.9094	18.0354	38.1131	16.8264	23.4377	17.7045	36.3431	28.2042	22.3359	14.3412	18.1466	18.8163
BMP3	0.164291	0.461808	0.075967	0	0.003042	0	0	0	0.020295	0	0	0	0	0	0.004349	0.016893
BMP4	0	0	2.46553	0	0	0	0	0	0	0	0	0	0.113136	0	0.01748	0.06802
BMP5	0	0.343139	0	0	0.004781	0	0	0	0	0	0	0	0.044468	0	0	0
BMP6	0.305309	0	0.292842	0.015404	0.125851	0.135141	10.7028	1.20242	3.94672	0.500399	3.8211	2.92957	2.55598	0.691388	0.618241	0.558737
BMP7	0.317906	0.451336	1.21799	0	0	0	0	0	0.015721	0	0	0	0	0	0.026944	0.14833
BMP8A	0.344973	0.618985	0.301979	0	0.052754	0.005538	0.328567	0.010643	0.346012	0	0.252083	0.103086	0.430225	0.032751	0.164967	0.279638
BMP8B	0.183378	0.542485	0.032339	0.02376	0.003883	0	0.088125	0.056406	0.032894	0.23916	0.048111	0.031939	0.090405	0.038566	0.011098	0.066008
BMPER	0.11283	0.103848	0.139235	0	0.003716	0	0	0	0	0	0	0	0	0	0	0.034389
BMPR1A	0.447179	0.372607	1.73833	0.017609	0.006469	0	0.103609	0.01926	0.010301	0.045774	0.012275	0.016472	0.13645	0.009536	0.013422	0.101415
BMPR1B	0.134941	0.199623	0.425384	0	0.003332	0	0	0	0.005557	0	0	0.010965	0	0	0.004763	0.018504
BMPR2	0.101421	0.324213	1.41846	0.843992	0.859403	0.747743	2.16787	1.29525	1.38909	0.951808	3.62109	3.04623	3.63335	0.981315	0.616013	0.655744
BMS1	0.239445	1.3605	1.63871	0.686524	0.075604	0.045661	1.5674	1.59407	0.662332	3.78652	1.28046	1.16697	2.27114	1.13072	0.189244	0.332531
BMT2	0.422353	0	1.03073	0.280234	0.992947	0.796714	0.953301	0.513435	0.642683	0.756159	1.2031	0.943072	1.75953	0.470615	0.344214	0.659889
BMX	0	0	0	0	0	0	0.050542	0	0	0	0	0	0.105565	0	0	0.028077
BNC1	0.079617	0.439653	0.229349	0	0	0	0	0	0	0	0	0	0	0	0	0.007281
BNC2	0.033406	0.141256	1.21924	0.004316	0.001411	0	0	0	0	0	0	0	0.036271	0.002338	0	0.01007
BNIP1	0.385561	2.20976	1.19925	2.25521	1.70271	1.61132	3.16859	2.31978	1.67105	4.89272	1.68267	1.91703	8.28003	2.8628	2.48524	2.46524
BNIP2	1.06361	0.848498	1.63031	1.33475	1.04349	0.97213	4.00367	2.47153	2.17085	4.89677	4.24867	3.46436	4.46148	1.58397	1.33341	1.1781
BNIP3	0.667118	0	1.06246	41.7149	0.423217	0.314624	18.8091	38.9173	2.01207	62.2889	2.78624	2.2147	5.45437	34.9373	0.331084	0.79274
BNIP3L	1.29174	0.758883	6.56311	100.671	166.451	154.532	177.84	165.377	120.558	162.663	169.02	158.458	119.136	126.687	119.197	121.319
BNIP5	0	0.34591	0	0	0.01021	0	0.181477	0.032957	0.042537	0.060817	0.04211	0.025177	0.367819	0	0	0.028331
BNIPL	0	0.43996	0	0.008898	0.034888	0.019503	0.012912	0	0.058119	0.046161	0.095849	0.114658	0.877539	0.057718	0.066399	0.139789
BOC	0	0	0	0	0	0	0	0	0	0	0	0	0	0	0	0.204309
BOD1	0.610028	0.975128	3.78685	0.846435	2.83417	2.99521	2.44101	0.671748	4.27059	1.59685	2.33861	2.24874	2.88358	1.04325	4.27247	4.76183
BOD1L1	0.189275	0.44014	1.20581	0.431645	0.887257	0.581519	5.07274	1.07732	1.44518	1.57988	4.64558	3.11348	3.10479	1.07484	0.759971	0.876137
BOD1L2	0	0	0	0	0.005792	0	0	0	0	0	0	0	0	0	0	0.032133
BOK	0.075696	0	2.62955	0	0.030027	0.006288	0.033296	0.012114	0.024989	0	0.061751	0.024647	0.034775	0	0.074928	0.249698
BOLA1	0	1.33752	1.99524	0.110852	0.155957	0.184226	1.79638	0.717898	0.901656	0.957298	1.34768	0.538792	1.40666	0.374383	0.588618	1.26202
BOLA2	1.13024	3.92954	2.08	6.00584	0.187416	0.360968	3.99606	5.18326	2.40271	10.5594	3.4509	3.29889	7.10381	6.11315	1.0774	1.63152
BOLA2-SMG1P6	0	1.6437	2.42301	1.24817	0.270156	0.068	0.399629	1.9097	0.633545	5.55677	0.842774	0.599714	3.4495	0.71711	0.166473	0
BOLA2B	7.49079	10.0225	18.9039	59.4812	15.9734	20.9157	44.4082	65.4831	118.289	95.5985	87.6633	98.4904	259.336	43.6785	76.1965	78.9926
BOLA3	2.10823	2.99452	7.19139	38.5627	0.823983	1.85105	16.7082	30.4063	4.07611	74.3349	7.52822	9.8239	26.8572	27.4236	1.9604	2.79666
BOLL	0	0	0	0	0	0	0	0	0.023457	0	0	0	0	0	0	0.012035
BOP1	1.98193	7.98547	8.88744	8.0035	0.286823	0.301915	11.5492	11.3856	3.37664	24.2674	1.61199	1.45193	9.61202	8.25084	1.63593	1.46855
BORA	0.105548	0.371347	1.01241	3.47012	0.967489	1.09143	3.34142	3.2538	0.580163	6.15641	3.06063	2.8426	4.18817	3.16338	0.633078	0.639281
BORCS5	0.009711	0.149416	0.23144	0.591072	0.273216	0.158644	1.03042	0.734224	0.642909	1.22014	1.16958	0.841537	1.24625	0.611452	0.308425	0.489893
BORCS6	0.551973	2.94788	1.98038	2.2651	2.62756	2.17957	7.94012	3.90204	4.07022	5.69297	11.0972	8.788	7.51722	4.06532	3.46889	4.77021
BORCS7	0.509504	0.829839	1.7432	1.93141	1.13662	0.803477	4.2328	3.95848	2.19162	7.45377	4.10386	4.13107	5.9356	2.13831	0.702759	1.54389
BORCS8	0	0	1.11317	0.883604	1.23752	0.8626	2.15164	2.04218	5.36447	2.6709	3.6157	3.82601	9.99708	0.633732	3.38887	3.39855
BORCS8-MEF2B	0	0	0	0.171802	0	0.1634	0.704682	0.059711	0.19992	0.166592	0.57713	0.440225	0.432755	0.044145	0.238576	0.766243
BPGM	0.407159	0.437291	1.90739	80.7403	174.117	170.688	163.011	166.251	83.5964	158.897	235.42	219.314	176.643	134.748	92.7686	89.1876
BPHL	0	0	0.974829	0	0	0.032083	0	0	0	0.363814	0	0.249084	0	0.111487	0.115813	0
BPI	1.09025	0	0.28129	0.842407	0	0	1.46483	1.72055	0.037301	0.177705	0	0.036779	1.39671	1.09399	0	0
BPIFA1	0	0	0	0	0	0	0	0	0.073614	0	0	0	0	0	0	0
BPIFA2	0	0	0	0	0	0	0	0	0	0	0	0	0	0	0	0
BPIFA3	0.573073	0.096426	0	0	0	0	0	0	0.040874	0	0	0	0	0	0	0
BPIFB1	0	0	0	0	0	0	0	0	0	0	0	0	0	0	0	0.330467
BPIFB2	0	0	0	0	0	0	0	0	0	0	0	0	0	0	0	0.042971
BPIFB3	0	0	0	0	0	0	0	0	0	0	0	0	0	0	0	0
BPIFB4	0.257843	0.914244	0	0	0	0	0	0	0	0	0	0.013996	0	0	0	0
BPIFB6	0	0	0	0	0.016183	0	0	0	0	0	0	0	0	0	0	0
BPIFC	0	0.88523	0	0	0.022017	0.040615	0.387007	0.078338	1.18716	0.057692	0.338637	0.412742	0.381166	0.064185	0.560783	0.768892
BPNT1	0.195198	0	0.992848	0.36858	0	0.008191	1.10416	0.750253	0.082884	2.53417	0.153533	0.190732	1.63279	0.535303	0.0355	0
BPNT2	0.75626	0.366205	2.93493	1.48605	0.66904	0.5494	3.1031	2.86607	1.92313	5.18483	4.51958	3.86135	4.1782	1.8791	0.883789	1.0554
BPTF	0.509721	0.4326	1.72148	0.868976	3.38661	2.31029	9.40004	1.70768	3.03985	2.2729	6.34753	4.65343	8.38033	1.89322	2.29843	3.18916
BPY2	0	0	0	0	0	0	0	0	0	0	0	0	0	0	0	0
BPY2C	0	0	0	0	0	0	0	0	0	0	0	0	0	0	0.080203	0
BRAF	0.122073	0.251002	0.364915	0.8384	2.56819	1.7662	4.75018	1.40357	3.3179	1.87542	3.95454	2.91913	4.03415	1.47272	2.65243	3.22885
BRAP	0.89608	0.88976	1.2255	5.36062	4.10222	3.78447	7.40672	5.83115	6.78225	9.07787	8.82393	7.02562	11.1945	5.19339	5.92562	5.90331
BRAT1	0.893594	9.70714	8.61481	2.37515	0.769674	0.689884	6.72317	3.30874	3.08679	6.14402	3.3251	2.27617	9.88819	3.73116	2.34066	2.7616
BRCA1	0.315533	1.08933	0.60484	0.990874	0.195551	0.224572	2.8039	1.19756	0.303091	2.28804	0.98211	0.914225	3.51512	1.09397	0.30062	0.312354
BRCA2	0.201419	1e-06	1e-06	0.682143	0.087069	0.109159	1.26582	0.830457	0.0969	1.06118	0.40933	0.297568	1.91617	0.725519	0	0
BRCC3	0	0	0.548136	0.037956	0	0.064018	0.437444	0.262645	0.320788	0.557747	0.18404	0	0	0.130429	0.090191	0.078119
BRD1	0.604335	1.25141	2.19347	0.568806	1.36129	0.942014	10.3863	2.66298	4.78354	2.91828	6.1801	4.65191	7.85927	1.92441	1.64174	2.2852
BRD2	0.716216	2.37989	7.30872	8.23188	19.4836	15.6808	53.9042	18.0979	27.1954	25.9636	43.8107	37.6271	37.5364	17.8807	17.8007	21.6438
BRD3	0.752367	2.1894	2.48185	2.89949	2.43415	2.25922	7.97567	4.82738	5.73229	5.46969	7.12557	5.90757	6.71578	5.52122	3.57863	4.95835
BRD3OS	0.158232	0.334738	1.15791	0.089757	0.048043	0.043696	0.684965	0.41558	0.4871	0.489266	0.52189	0.433016	1.23739	0.174917	0.229037	0.347898
BRD4	1.27334	3.55786	2.46284	3.71883	10.6081	7.71508	23.6348	7.63822	21.5435	7.07264	17.4155	14.6632	21.5266	9.21527	17.9145	24.2875
BRD7	0.240667	0	0	0.172085	0.302996	0.099123	0.736321	0.435744	0.63168	0.467489	0.543782	0.599994	3.74031	0.387219	0.339779	0.58349
BRD8	0.079329	0.939649	2.00005	3.61284	9.62304	6.78436	19.5179	6.96398	6.33407	8.90586	16.0181	12.7705	33.5065	8.11322	6.51187	7.44879
BRD9	2.06041	5.83866	10.32	3.22201	1.60497	0.850989	9.20486	4.85938	7.22378	8.30187	8.2444	5.45012	18.8781	4.17554	6.46558	6.09881
BRDT	0	0	0	0	0.014583	0	0	0	0	0	0	0	0	0	0	0
BRF1	0	4.77126	4.21709	0.50222	0.090878	0.040354	0.869849	0.741847	0.441964	1.25228	0.43626	0.350083	2.17653	0.469398	0.12247	0.1871
BRF2	0.129766	0.153421	1.37423	1.52493	0.988529	0.83441	5.1375	3.50191	2.33927	7.02798	7.12946	7.20035	5.75076	2.74901	1.99298	1.86942
BRI3	4.41421	4.39606	21.4195	33.6389	72.1032	70.5338	65.2162	58.4317	95.3532	47.5148	103.223	122.193	97.6645	53.757	94.3719	145.183
BRI3BP	0.841479	1.98978	0.717388	0.361762	0.008251	0.011553	0.855224	0.515519	0.022943	1.67287	0.083014	0.126764	0.339922	0.35522	0.007866	0.066204
BRICD5	0.104221	12.6246	14.2562	0	0.349102	0.471586	3.38821	0.40917	5.79421	0.434714	3.74803	3.13493	17.9105	0.625363	4.81725	3.5998
BRINP1	0.574629	0.436903	0.033883	0	0	0	0	0	0.040622	0	0	0	0	0	0	0.05637
BRINP2	0	0.073738	0.038508	0	0	0	0	0	0	0	0	0	0	0	0	0.008552
BRINP3	0	0	0	0	0.006189	0	0	0	0	0	0	0	0	0	0	0
BRIP1	0.030253	0.115192	0.159604	0.023205	0	0	0	0	0	0.014479	0	0	0	0.009622	0.006361	0
BRIX1	0.268328	0	2.68482	7.20523	1.16333	1.02107	5.94074	9.22898	2.61968	24.0886	5.0205	5.3539	23.8097	7.764	1.3718	1.4737
BRK1	7.59929	13.5971	32.0858	53.3584	10.7403	9.26233	32.5565	52.5447	36.5311	91.7218	50.4768	39.4978	130.624	44.1575	23.4971	27.2737
BRME1	0.384966	2.86273	0	0.242188	0.039357	0	0.255843	0.2398	0	0.383484	0.078125	0.126925	0	0.580383	0	0.143553
BRMS1	1.29339	0	6.14926	6.41572	3.0845	3.3532	5.6489	3.92371	11.1859	10.4277	12.2615	8.55113	14.7085	5.73693	11.4555	14.4562
BRMS1L	0.151211	1.00965	1.28788	0.263037	0.089662	0.156474	0.858383	0.506407	0.356471	1.08155	0.49897	0.645903	1.22883	0.282754	0.245055	0.408805
BROX	1.12648	1.85831	1.15035	8.38491	7.03473	5.95916	15.3827	12.2651	10.721	19.345	17.0845	14.4091	24.5204	8.97083	8.95488	8.85313
BRPF1	0.5647	0.0383	0.1948	0.501516	0.704601	1.39358	3.76477	1.20624	3.92067	1.26816	3.25828	3.30092	2.11776	0.941212	2.16293	2.77331
BRPF3	0	0.290385	1.55401	1.84123	3.52874	2.85618	22.4566	6.32964	9.04743	6.13996	10.9559	9.12086	8.55314	4.69256	4.14975	3.71701
BRS3	0	1.26435	0	0	0.028264	0	0	0	0.011764	0	0	0	0	0	0	0
BRSK1	0.226358	0.363961	1.09805	0	0	0	0	0	0	0.012963	0	0	0	0	0	0.027306
BRSK2	0	0	0	0	0.018529	0.003887	0.04118	0.022428	0.123535	0	0.10513	0.034491	0	0.007666	0.218346	0.154266
BRWD1	0.197908	0.559517	0.398845	0.37555	0.768411	0.675022	3.79366	0.683043	1.41989	1.03075	2.70671	1.67737	3.97727	0.707984	0.917269	0.949482
BRWD3	0.066215	0.257594	0.370811	0.235268	0.495521	0.406966	1.76423	0.521555	0.972728	0.726748	1.43583	0.950924	1.62418	0.384609	0.744881	0.688416
BSCL2	0	1.55378	0	0	0	0	0	0	0.057298	0	0	0	0	0	0	0
BSDC1	0.705467	2.41056	0.867187	18.5135	40.5082	32.6009	85.1377	31.9963	62.7992	28.3114	84.1275	77.1578	33.7617	28.1949	48.6504	54.062
BSG	10.3107	16.4135	40.7567	561.262	774.962	737.838	931.167	802.911	1159.31	823.394	1296.56	1194.62	281.255	713.762	862.804	987.078
BSN	0.075561	0.380896	0.012501	0.012063	0.031557	0.025589	0.236065	0.021831	0.100128	0.015698	0.135409	0.100272	0.113272	0.029873	0.090342	0.138998
BSND	0.075615	0.216334	0	0	0	0	0	0	0.003112	0	0	0	0	0	0.02134	0.044893
BSPH1	0	0	0	0	0	0	0	0	0	0	0	0	0	0	0	0
BSPRY	0	0	0	1.3072	0.653055	0.503519	2.07644	1.41428	0.372757	2.35479	3.60748	2.51895	2.57393	0.953226	0.771428	0.968202
BST1	0.76295	1.63908	2.50524	0.110901	0	0	0.274769	0.250395	0	0.081931	0	0	0.54897	0.051282	0	0
BST2	11.2665	17.1312	27.9925	2.63243	0.327301	0.534327	12.8626	4.34415	3.12631	12.0845	24.7007	22.7587	116.605	2.35644	1.70544	2.42469
BSX	0	2.34189	0	0	0.078584	0	0	0	0	0	0	0	0	0	0	0.144099
BTAF1	0.531148	0.273673	1.53346	0.856901	3.36874	2.28169	11.6726	2.10579	7.12144	3.67272	15.0942	9.41952	30.9299	3.07384	5.25585	6.14581
BTBD1	1.28281	2.14338	4.81712	4.86173	2.77051	3.01953	8.95283	7.73573	4.50642	13.2819	8.93412	9.52403	8.35182	5.10242	2.83191	2.97195
BTBD10	0.492917	1.06847	3.12891	2.28402	0.430729	0.384175	2.95647	2.33257	0.84114	4.2839	2.78432	3.04819	4.16959	1.43249	0.478304	0.35048
BTBD11	0.334261	0.571119	0.428883	0	0	0	0	0	0.009187	0	0	0.009062	0	0.018246	0.03936	0.091783
BTBD16	0	0	0	0	0	0	0	0	0	0	0	0	0	0	0	0
BTBD17	0.121802	0.911131	0.202772	0	0	0	0.026818	0	0.0403	0	0	0.059601	1.08895	0.020037	0.241555	0.44759
BTBD18	0	0.289147	0	0	0.006607	0	0.014663	0	0.077015	0	0.013602	0.010852	0.229847	0	0.084837	0.280928
BTBD19	0.566474	0	0	0	0.072866	0.072847	1.06249	0.086545	0.765919	0	0.283386	0.409928	1.49342	0	0.448292	0.383541
BTBD2	3.13428	5.34338	11.4969	1.71293	0.396943	0.426869	3.9425	1.691	2.98297	3.08937	3.31639	2.96621	6.25046	1.70117	0.933252	1.16742
BTBD3	0	0.287791	1.22806	0.441247	0.032049	0.016815	0.786192	0.543134	0.066796	1.28144	0.297776	0.270178	1.15634	0.298398	0	0.03707
BTBD6	0.914436	3.63869	3.33509	4.07418	0.717504	0.825083	4.25257	3.98617	3.4321	5.13914	3.151	3.42885	7.51451	3.4459	1.39737	1.77793
BTBD7	0	0	1.13484	0.416242	2.23439	1.23517	7.44829	1.29776	2.75849	2.48397	3.99991	2.76153	2.7708	1.23495	1.52179	2.34285
BTBD8	0	0	0	0	0	0	0.162141	0	0	0	0.061075	0	0	0	0	0
BTBD9	0.25469	0.396254	0.507828	0.05599	0.032304	0.007239	0.206191	0.048667	0.111415	0.059959	0.18715	0.131209	0.236236	0.032099	0.089343	0.139603
BTC	0	0	0.165059	0	0	0	0	0	0	0	0	0.012184	0	0	0	0.013716
BTD	0	0	1.29869	1.15004	0.53135	0.459283	1.50807	1.64526	1.141	2.41283	1.57444	0.987926	1.83587	1.27238	0.629794	0.726985
BTF3	54.6816	61.4694	94.1584	229.649	154.953	154.581	247.577	288.245	244.599	499.698	346.748	309.048	244.861	200.144	212.483	201.506
BTF3L4	1.32435	0	4.54075	8.07262	3.62297	4.60329	7.96284	9.3282	12.5121	16.1898	13.9989	12.9074	13.802	7.18308	8.95141	9.84896
BTG1	0.775369	0.432265	2.50253	3.43356	7.19201	5.31653	20.1876	11.0948	17.5256	10.4673	26.0575	22.7947	8.88594	8.08826	10.0844	11.6114
BTG2	0.338564	0.800656	2.15928	54.0746	80.8932	70.849	155.833	88.76	143.71	89.5709	164.269	138.546	104.085	72.4143	124.527	130.215
BTG3	0.291379	0	3.28669	13.6011	3.03934	2.56857	8.29045	9.36358	6.55746	17.4024	11.634	9.69758	17.5113	10.0692	3.28436	3.56191
BTG4	0	0	0	0	0	0	0	0	0	0	0	0	0	0	0	0
BTK	4.53733	10.1716	5.45167	6.41627	1.52272	1.28278	12.3019	9.51233	1.64461	16.502	8.70934	7.22359	11.6101	8.81984	1.2562	1.27822
BTLA	0.125062	0.616295	0	0	0.161564	0.111329	0.344935	0.046282	0.035455	0.036867	0.059857	0.091571	0.488636	0.023064	0.080162	0.171766
BTN1A1	0.333662	0.210445	0	0	0	0.005542	0.044021	0	0	0.013117	0.013612	0	0	0	0.009433	0.048893
BTN2A1	0.669948	1.85763	1.83271	0	0.307448	0.143308	1.08982	0.259493	0	0.409278	2.1031	1.54603	2.67899	0	0	0
BTN2A2	0	0	0.291505	0	0	0	0.025717	0.056296	0.019321	0.046022	3.61545	2.52973	0	0	0	0.026665
BTN3A1	0	0.516675	0.397063	0	0	0.019852	0.272423	0.134177	0.18418	0.216226	1.01617	0.819262	1.68165	0	0.084487	0.175328
BTN3A2	0.472611	1.11235	1.28486	0	0.086102	0	1.16741	0.058566	0.362449	0.793437	2.25985	2.1365	5.26116	0.424526	0	0.15772
BTN3A3	0	0	0.248014	0	0	0	0	0.07078	0	0.089805	0.086811	0.070687	0.58085	0	0	0
BTNL2	0	1.05317	0.12424	0	0	0	0	0	0	0	0	0.048563	0	0	0	0.08209
BTNL3	0	0.259023	0.158713	0	0	0	0	0	0.027134	0	0	0.02676	0	0	0	0.030126
BTNL8	0	0	0	0	0	0	0	0	0.045041	0	0	0	0	0	0	0.016671
BTNL9	0	0	0	0	0	0	0	0	0.02164	0	0	0	0.059923	0	0	0
BTRC	0.102735	0.498523	0.927745	5.14776	1.67371	1.11602	12.9877	9.67622	1.13708	14.1043	5.19556	3.69616	13.0162	7.81409	1.08773	1.25639
BUB1	0.227685	0	2.26519	4.53407	1.92246	1.459	7.13846	7.65552	0.51195	16.786	6.26307	5.07392	3.73189	6.04252	0.521389	0.950386
BUB1B	1.04696	0.566773	1.40466	4.48921	0.820647	0.72461	6.81482	4.68875	0.403773	10.6405	3.41642	2.62506	9.71872	5.06	0.785022	0.838715
BUB3	2.88103	0	13.279	12.8489	7.59081	6.03758	45.0443	21.7324	16.327	44.7737	37.9459	26.053	34.8865	19.9005	5.69704	7.19003
BUD13	1.39906	1.00691	1.93578	1.99367	0.622327	0.417083	3.70039	2.86327	1.80219	4.18501	2.71863	1.25007	3.06105	2.09726	1.24109	1.15985
BUD23	0	0	0	0.912098	0.196827	0.159266	3.48762	2.3213	1.91072	6.17576	2.69626	1.04257	2.94899	1.17355	1.53675	1.7753
BUD31	1.59807	1.44267	10.4409	35.9834	22.2976	19.3098	31.6964	47.5366	49.8474	78.7951	61.4902	59.2748	86.4283	37.987	37.1856	42.3668
BVES	0.192249	0.013383	0.706807	0	0	0	0	0	0	0	0	0	0	0	0	0.018609
BYSL	0	4.19755	4.25077	7.53717	0.568439	0.744436	8.86636	10.6687	3.75079	26.552	4.42749	5.08695	9.27045	7.63164	1.64922	1.48894
BZW1	6.04701	0	16.9037	6.24598	10.0458	7.67422	26.9175	14.3357	15.2158	34.023	19.6997	20.0013	12.8985	9.12143	10.855	8.37127
BZW2	0	0.737348	4.79846	4.42244	1.63734	0.916164	7.50093	6.0101	3.57308	13.4257	3.02517	3.12426	1.39281	3.07633	1.20768	1.16308
C10orf105	0.501246	0.124869	0	0	0	0.003283	0.052175	0.012623	0.039123	0	0.290701	0.109358	0.036416	0.012946	0.044706	0.065136
C10orf120	0	0	0	0	0	0	0	0	0	0	0	0	0	0	0	0
C10orf143	0	0	1.46936	0	0	0.127192	0.134295	0.099271	0.050679	0.301481	0.123421	0	0	0.101171	0	0
C10orf53	0	0.458309	0	0	0.008245	0	0	0	0	0	0	0	0	0	0	0
C10orf62	0	0	0	0	0	0	0	0	0	0	0	0	0.042677	0	0	0.240992
C10orf67	0	0	0	0	0	0	0	0	0	0	0	0	0	0	0	0
C10orf71	0.155588	0	0	0	0	0	0	0	0	0	0	0.005836	0	0	0.00507	0.072219
C10orf82	0	0	0	0	0	0	0	0	0	0	0	0	0	0	0	0
C10orf88	0.202604	2.12971	1.43208	2.7349	1.43971	1.21039	5.91832	4.43338	3.10944	5.78048	4.41197	4.53475	11.9195	4.25327	1.82637	1.58713
C10orf90	0	0	0	0.061317	0	0	0.029461	0	0	0	0	0	0	0.022023	0	0.024594
C10orf95	0.688815	0.290394	1.3859	0.067767	0.13267	0.098352	1.04062	0.142678	1.34471	0.087343	1.08251	0.413088	0.574578	0.04865	0.52323	0.733308
C10orf99	0	0	0	0	0.127174	0.183718	0	0	0	0	0.254544	0	1.6375	0.07956	0.044683	0.290821
C11orf1	3.38727	1.97746	4.55035	3.90955	0.266382	0.323134	1.83953	2.78442	1.72312	4.4751	2.69571	2.22108	5.12482	3.89727	0.917041	1.56109
C11orf16	0.18553	1.75349	0.400943	0	0	0	0	0	0	0.021923	0	0	0	0	0.015763	0.204412
C11orf21	0.929081	4.66924	2.28424	1.33909	0.145029	0.069445	4.50901	0.713269	2.48367	0.91779	1.17963	1.00937	8.10104	1.11933	0.782783	0.855293
C11orf24	1.08657	1.5175	4.41254	2.45109	2.04094	2.22025	10.2106	4.54538	14.5992	5.16767	15.5368	13.0394	7.71898	3.31045	6.36015	7.65641
C11orf42	0	0	0	0	0	0	0.746609	0	0.132246	0.118076	0.243164	0	0.090976	0.131713	0.113142	0.293927
C11orf45	0.124364	0	0.146494	0.016139	0.010548	0	0	0	0.017576	0	0	0.008669	0.024509	0	0.007531	0.14633
C11orf49	1.76836	0	2.41837	0.409508	0.205436	0.090315	1.39044	1.04768	0.391486	2.10216	0.664233	0.660954	1.12739	0.740448	0.167471	0.108761
C11orf52	0	0	0	0	0	0	0	0	0	0	0	0	0	0	0	0
C11orf53	0	0	0	0	0	0	0	0	0	0	0	0	0	0	0	0
C11orf54	0.169512	0.14759	0.768184	0.667447	1.17047	1.09574	2.22119	1.34942	2.02073	1.75901	2.82163	2.36152	3.80883	1.27252	1.527	1.88588
C11orf58	3.09483	0	1.11206	3.24362	2.59994	2.47912	4.98261	7.16762	3.77518	12.1203	9.40153	5.75949	4.65774	6.68293	4.07278	3.32213
C11orf65	0	0	0	0	0	0	0.117502	0.045405	0.058939	0.196109	0.065442	0.145215	0	0	0.024919	0
C11orf68	0.63995	5.61302	6.59645	8.07016	21.0418	20.734	40.6859	20.7905	38.7091	21.4131	37.0217	33.3933	43.2903	15.6499	27.503	29.1772
C11orf71	0	1.99411	3.29411	2.5309	1.79047	3.01656	2.49428	2.37586	10.9658	2.9382	9.11458	7.38117	9.9528	4.28002	9.71303	7.42422
C11orf80	0	0	0	0	0	0.045754	0	0.090496	0.091399	0	0	0.089829	0	0	0.233714	0
C11orf86	0	0.830524	0	0	0	0	0	0	0	0	0	0	0	0	0	0.283451
C11orf87	0	0	0.149138	0	0	0	0.007033	0	0	0	0	0	0.081037	0	0.018077	0.035113
C11orf91	0	4.78147	0	0	0.293523	0.053819	0.284053	0.052557	0.589818	0	0.391312	0.052787	1.09426	0	0.507955	0.368308
C11orf94	0	0	0	0	0	0	0	0	0	0	0	0	0	0	0.486737	0
C11orf95	0.285097	1.54429	1.69507	0.144103	0.090963	0.03274	1.32264	0.330343	0.15714	0.225983	0.181261	0.058807	1.18097	0.263545	0.027866	0.330775
C11orf96	0.623651	0.468242	0	0.495845	0.085121	0.056714	4.08675	1.62006	0.394863	2.78729	0.138552	0.194585	2.10109	0.982587	0.362067	0.407372
C11orf97	0	0	0	0	0	0	0	0	0	0	0	0	0	0.071741	0	0.15961
C11orf98	1.51709	8.51571	19.6305	18.9791	2.17982	3.96427	19.1287	24.6678	26.6499	42.8045	28.0081	24.7094	43.2668	15.4956	9.83976	13.4085
C12orf29	0	0	0	1.31501	0.755232	0.875178	0.48455	1.45367	0.53935	3.62981	0.885999	0.79709	0.748148	0.969826	0.605313	0.418479
C12orf4	0.218461	0	0.969572	2.46462	0.468797	0.389111	2.51857	2.9298	0.473745	5.41284	2.45874	2.42669	6.06308	2.10442	0.541287	0.61454
C12orf40	0	0	0	0	0	0	0	0	0.063524	0	0	0	0	0	0	0
C12orf42	0.331394	0	0	0	0	0	0	0	0	0	0	0	0	0	0	0
C12orf43	0.950741	1.93317	1.10685	0.357526	0.125259	0.066309	1.03201	0.668025	0.338475	2.08751	0.832421	0.553676	1.70346	0.618491	0.35342	0.453413
C12orf45	0.630793	1.889	0.219999	0.016983	0.070359	0.019224	0.137063	0.036001	0.136806	0.0804	0.071721	0.05555	0.239583	0.016113	0.046514	0.308002
C12orf50	0	0	0	0	0	0	0	0	0	0	0	0	0	0	0	0
C12orf54	0	0	0	0	0.027843	0	0	0	0	0	0	0	0	0	0	0
C12orf56	0.016262	0	0	0	0	0	0	0	0.008042	0	0	0	0	0	0.027567	0.037508
C12orf57	11.241	12.458	15.9349	6.11937	1.02554	3.1088	7.47795	5.8618	5.16868	5.37192	12.3076	9.31548	20.1115	4.27974	1.77255	3.26165
C12orf60	0	0	0.486609	0.617364	1.03427	0.661457	2.19484	0.866753	0.579604	1.11501	2.35981	1.27466	8.1454	0.953444	0.763422	1.2133
C12orf65	0	0	1.95679	6.32259	2.18348	2.07693	4.29565	5.99142	3.01711	7.5896	5.93028	4.19682	5.08768	5.3136	4.2295	3.68621
C12orf66	0	0	0.020249	0.089191	0.029137	0.042718	0.355465	0.364396	0.230388	0.447809	0.284697	0.334868	0.573831	0.132503	0.023161	0.17501
C12orf71	0.621823	0	0	0	0.023485	0	0.15444	0	0.193934	0	0.426972	0	0.053198	0	0.099514	0.043115
C12orf73	0	0.585339	0.309488	0.321475	0.358009	0.329943	0.788931	0.537746	0.817861	1.34276	1.41298	1.13182	2.395	0.42809	0.509025	0.61473
C12orf75	3.42136	1.24628	1.78319	0.036467	0	0	0	0	0	0.032923	0	0	0	0.027521	0.047329	0.12288
C12orf76	0.225458	0	0.526451	0.289424	0.094454	0.05631	1.66848	1.11016	1.81389	2.10681	6.33955	4.0842	22.7173	0.80187	0.230066	0.32336
C13orf42	0	0	0	0	0	0	0	0	0	0	0	0	0	0	0	0
C13orf46	0.033904	0	0.265493	0	0	0	0.167677	0.01624	0.008384	0.019979	0.062255	0.016542	0.16372	0	0.035924	0.037228
C14orf119	0.692532	1.22412	2.24956	7.38136	11.5661	10.9939	23.6612	13.5481	28.4153	18.6578	42.3012	41.5412	37.1988	9.3934	17.8081	16.4098
C14orf132	0	0	0	0	0	0	0	0	0	0	0	0	0	0	0	0.217865
C14orf180	0.14932	0.705022	0	0	0	0	0	0	0	0	0	0	0	0	0	0.054956
C14orf28	0.111635	0	0.258225	0.120317	0.245562	0.193807	0.456583	0.223752	0.655094	0.473977	0.547338	0.436025	0.184697	0.175634	0.259743	0.252687
C14orf39	0	0	0.058758	0	0	0	0	0	0	0	0	0	0	0	0	0
C14orf93	0.115649	1.48192	0.429387	0.981052	0.177028	0.14881	1.48734	0.877645	0.362385	1.61337	0.849333	0.675616	3.46939	0.965995	0.155257	0.211728
C15orf39	0	0	4.17297	0.349201	0	0	2.30128	0.455362	0.2759	0.218516	0.551328	0.361541	0.612875	0.738164	0.078387	0.204947
C15orf40	0	0	0	1.01616	0	0.074554	0.195127	0.150196	0.149451	0.354231	1.05299	0.292971	2.32145	0.452875	0.253916	0.667866
C15orf48	0	0	0	0	0	0	0	0	0	0.14579	0	0	1.28926	0	0	0
C15orf61	0.106412	0	0.350605	0.351841	0.66739	0.574732	0.33076	0.465788	1.16581	0.983685	1.23982	1.09419	1.38757	0.328371	0.654624	0.623313
C15orf62	0.83718	0.327266	0.268236	0.02461	0	0.040389	0.891047	0.207545	0.317955	0.318694	0.313913	0.290236	0.241871	0.159484	0.034377	0.267333
C15orf65	0	0	0	0.226661	0.029514	0	0.193226	0.14271	0.291586	0.17347	0	0.526379	0.119235	0.145486	0.08307	0.270225
C16orf46	0	0	0	0.050322	0.143833	0.178281	0.619084	0.194733	0.365852	0.363479	0.326141	0.348463	0	0.069895	0.251281	0.58687
C16orf54	0.698014	2.04787	0.042776	0.047099	0.061541	0	0.085292	0.012414	0.051212	0.122015	0	0.025255	0.302829	0.101757	0.05484	0.355369
C16orf70	0.600881	1.91752	0.948563	1.01214	0.754918	0.674481	3.14046	1.32265	1.92392	2.94992	2.31706	1.85601	9.50744	1.58142	1.58143	1.4043
C16orf71	0	0	0	0	0	0	0	0	0	0	0	0	0.541537	0	0	0.582092
C16orf72	0.988065	0.808627	1.34807	2.41943	4.46205	3.57246	8.67403	5.41284	6.04579	7.99001	7.98658	6.80527	6.35017	3.56749	4.26035	5.11905
C16orf74	0	0	0.472652	0	0	0	0	0	0	0	0	0	0	0	0.102189	0.044278
C16orf78	0	0	0	0	0	0	0	0	0	0	0	0	0	0	0.030571	0
C16orf82	0	0	0	0	0	0	0	0	0.01493	0	0	0	0	0	0.012789	0.016578
C16orf86	1.23988	0.905435	2.47623	0.163194	0	0.042351	0.056717	0	0.036438	0.410742	0	0	0.238541	0	0.110271	0
C16orf87	0	0.182864	0.321073	0.242825	0.174913	0.099047	0.40727	0.438694	0.350192	0.678742	0.551488	0.487266	1.14217	0.287562	0.380978	0.308934
C16orf89	0	0	0	0	0	0	0	0	0.053743	0	0	0	0	0	0	0.179121
C16orf90	0.618716	1.76902	0	0	0	0	0	0	0.220853	0	0	0.130505	0	0	0	0.491114
C16orf91	0	0	1.83512	2.65647	2.93962	2.71584	4.48748	5.80146	9.13894	7.07111	7.03292	4.99948	10.549	4.41108	6.34895	6.64931
C16orf92	0	0	0	0	0	0	0	0	0	0	0	0	0	0	0	0.047409
C16orf95	1.16041	0	0	4.69662	0.22573	0.030023	1.49554	3.15513	0.106827	5.71394	1.02758	1.20333	0.697708	3.1867	0.141564	0.511271
C16orf96	0.159122	0.30121	0.026221	0	0.028327	0.019807	0	0	0.031476	0	0.01948	0	0.098806	0	0.053946	0.165957
C17orf100	0.491201	0	0	0.07496	0	0.040875	0.324465	0.078951	0.142214	0.266158	0.250263	0.32049	1.66082	0.121216	0.104376	0.451284
C17orf107	1.17046	1.10462	0	0.134776	0.105494	0.043915	0.34699	0.198506	0.226152	0.069345	0.374679	0.430504	0	0.260907	0.174446	0.841262
C17orf113	0.826083	2.32096	0.184438	0.023447	0	0	0.022698	0.024732	0.059586	0.010142	0	0.008397	0.166207	0.025357	0.021883	0.292922
C17orf114	0	0	0	0	0	0	0	0	0	0	0	0	0	0	0	0
C17orf49	0	2.26196	4.76837	4.4081	0.416977	0.465891	6.4363	5.85829	4.29108	8.53228	5.26796	4.99186	5.06727	5.98084	1.35419	1.7578
C17orf50	0.834442	0	0	0	0.022908	0	0	0	0.189218	0	0	0.111845	0.519307	0	0	0.126193
C17orf58	0	0	0	0.427089	0.030953	0.05106	0.500457	0.320646	0.068357	0.767761	0.35935	0.165061	0.522418	0.166862	0.096062	0.231949
C17orf64	0	0	0	0	0	0	0	0	0	0	0	0	0	0	0	0
C17orf67	0	0	0.583344	0.015323	0.530357	0.661191	1.61303	0.048437	2.08279	0.178333	2.62671	1.9657	4.00451	0.06614	1.38202	1.54825
C17orf75	0	0	0.276435	0.745594	0	0	1.80019	1.23356	0.306587	1.81637	1.07859	1.05154	5.54581	0.774507	0	0
C17orf78	0	0.593911	0	0	0	0	0	0	0	0	0	0.017559	0	0	0	0.019776
C17orf80	0.313421	0	0.38983	0.371851	0.485742	0.468962	3.03375	1.29624	1.05632	2.36847	2.51137	2.38977	1.61855	0.914529	0.558825	0.517475
C17orf97	0.489964	0.445247	0	0.206829	0.022508	0.047028	0.472914	0.181571	0.243067	0.556734	0.276558	0.387154	0.648243	0.111535	0.192138	0.186882
C17orf98	0.654902	9.97258	1.0052	0	0.152259	0	0	0	0.08271	0.098293	0	0	0	0	0.141074	0.276369
C17orf99	0.842857	0.297774	0	12.1021	0.20412	0.253699	8.20923	11.3119	0.126288	13.4764	0.771373	1.53411	0	13.6412	0	0.3744
C18orf21	0	4.80722	0.626094	4.36201	1.38795	1.1708	3.87967	5.05365	5.17878	8.18977	5.56898	5.28431	10.2078	3.83343	2.34132	3.00141
C18orf25	0	0	0	0.85344	0.231441	0	1.34068	1.6772	0.695476	2.05229	0	0.485373	0.423293	0.980964	0.426501	0.913395
C18orf32	0.152391	0.366317	0.405903	0.272807	0.126811	0.119198	0.733152	0.507677	1.13175	0.737861	1.11577	1.03937	1.20045	0.358367	0.379284	0.35447
C18orf54	0.197845	0.442278	0.686882	0.473193	0.074898	0.073841	0.652033	0.562401	0.048884	0.957866	0.383574	0.332246	1.11548	0.458262	0.097762	0.07837
C18orf63	0	0	0	0	0.010982	0	0.008142	0.005908	0	0	0	0.012045	0	0.00606	0.005232	0.054204
C19orf12	0.672825	2.69976	0.819062	0.112821	0.026028	0	0.163938	0.056012	0.094013	0.275732	0.098488	0.16409	0.28261	0.021539	0.02479	0.232788
C19orf18	0	0.424961	0	0	0	0	0.059821	0	0.045113	0.107369	0	0.088857	0.431627	0	0.038567	0
C19orf25	0.099563	1.17108	0.67949	0.651011	0.454066	0.750335	3.82928	1.5124	2.48299	2.25273	4.43041	3.79575	1.15477	1.52303	1.06454	1.66242
C19orf33	0	0	0.801613	0	0	0	0	0.113011	0	0	0	0	0	0.114142	0	0
C19orf38	1.77784	0.960261	0	0.240121	0.022358	0.055683	0.78478	0.18026	0.258616	0.131928	0.271323	0.291185	1.36951	0.110441	0	0.205319
C19orf44	0	0.056148	0.601391	0.064854	0.02478	0.006435	0.169497	0.180305	0.209701	0.339999	0.24683	0.084043	0.55149	0.09534	0.108516	0.113277
C19orf47	0.502219	0.742612	1.16847	0.800477	1.32609	1.56132	2.16249	0.870138	1.11323	2.19705	1.8016	1.08888	2.02845	0.930483	1.23626	2.03758
C19orf53	6.02981	3.38464	16.4951	20.2758	17.714	20.2792	43.2334	34.8512	66.5408	64.4254	68.75	61.2094	47.3738	25.2229	47.6718	39.6561
C19orf54	0	3.08983	1.31072	1.33277	0.256813	0.186196	2.36556	1.77352	1.26179	2.95342	2.23507	1.71082	3.7507	1.61779	0.716843	1.31932
C19orf67	0	0	0	0	0	0	0	0	0.07496	0	0	0	0.138125	0	0	0.055514
C19orf71	0	0	0.368298	0	2.56753	1.96208	10.9996	0.140171	5.26644	0.253838	5.84751	3.36041	11.2217	0.569751	6.07376	9.03191
C19orf73	1.09846	3.01068	0.946265	0.229846	0.523088	0.614827	1.13508	0.481563	2.75792	0.364451	1.70957	1.6285	0.664302	0.918822	1.57016	2.18229
C19orf81	0	0	2.32362	0.242418	0.179615	0.043901	1.24101	1.20044	2.97034	2.65785	2.57483	3.06296	0.848592	0.922127	1.86237	0.998428
C19orf84	0	0	0	0	0	0	0	0	0.027496	0.032739	0	0	0	0	0	0.122194
C19orf85	0	0	0	0	0.016562	0	0.036488	0	0.109781	0	0	0	0	0.027316	0	0.121967
C1D	0.876819	0.678991	1.82933	9.89966	8.55028	9.60083	10.789	11.9193	8.85585	16.417	13.819	15.5625	12.5644	9.17193	8.53375	8.06961
C1GALT1	0	0	4.00598	3.05221	1.69135	1.92516	5.64034	3.77655	3.70431	7.18901	8.62686	5.99639	6.8936	3.71015	2.08013	2.10881
C1GALT1C1	0.865366	0.715343	2.95657	1.26879	0.310583	0.140458	2.20112	2.90192	2.29863	5.39824	4.86698	5.1254	6.33594	1.92289	0.386256	0.286328
C1GALT1C1L	0	1.16911	0.244415	0.107393	0	0	0.231332	0.028246	0	0.103609	0	0	0	0	0	0.032229
C1orf100	0	0	0	0	0	0	0	0	0	0	0	0	0	0	0	0
C1orf105	0	0	0	0	0	0	0	0	0	0	0	0	0	0	0	0
C1orf109	0.028482	0.639695	1.09115	8.72934	7.01032	6.19975	13.0896	12.5637	8.97744	15.0844	12.666	11.6729	16.3561	11.0556	7.24239	6.11762
C1orf112	0	0	0	0.537953	0.156036	0	0.111385	0.222398	0	0.458673	0	0	1.15291	0	0	0.197474
C1orf115	0.453982	0.3758	0.11253	0.010328	0.026993	0.005655	0	0	0	0	0.041669	0.033248	0	0	0.02888	0.162166
C1orf116	0	0.270166	0.225295	0.481124	5.1206	3.64684	3.24275	0.464011	1.77689	0.436895	0.880508	0.784706	0.835264	0.408745	2.16111	2.44174
C1orf122	0.21607	1.36072	3.66646	2.58774	2.96328	2.9392	5.62516	3.33781	8.51209	4.56217	7.98151	8.26475	10.3129	3.31192	6.02676	7.96867
C1orf127	0	0	0	0	0	0	0	0	0	0	0	0	0	0	0.012629	0.014188
C1orf131	0.18794	0.571335	0.511091	1.39453	0.255725	0.207455	1.27562	1.39271	0.864388	3.35841	1.39618	0.931197	2.8856	1.40052	0.455678	0.457713
C1orf141	0	0	0	0	0	0	0	0	0	0	0	0	0	0	0	0
C1orf146	0.099217	0	0	0	0	0	0	0	0	0	0	0	0	0	0	0
C1orf158	0.054264	0.641898	0	0	0.02148	0	0	0	0.053686	0	0.022141	0.061785	0	0	0.023002	0.019865
C1orf159	0	0	0	0.043137	0.068868	0.082302	0.770553	0.136441	0.415742	0.12072	0.570895	0.300239	5.03647	0.175732	0.352706	0.193881
C1orf162	2.52033	5.78114	2.83176	0.437759	0.368778	0.316513	1.00009	0.488025	0.526954	0.415394	0.256964	0.050379	7.24793	0.57928	0.417366	0.864757
C1orf167	0.655912	0.181642	0.011489	0.006365	0.018965	0	0.163063	0.027049	0.048487	0.020059	0.07818	0.013806	0.087727	0.031215	0.044356	0.361687
C1orf174	0	1.92915	1.52741	2.64311	2.04182	1.71792	5.44141	2.94771	5.43075	6.37674	7.16327	5.96795	6.37163	2.74485	4.31173	4.11664
C1orf185	0	0	0	0	0	0	0	0	0	0	0	0	0	0	0	0
C1orf189	0	0	0	0	0	0.03576	0.094238	0	0	0.084816	0.258584	0	0.769078	0	0.243534	0.873608
C1orf194	0	2.43497	0	0	0	0	0	0	0	0	0	0	0	0	0	0
C1orf198	0.241426	1.65242	3.41192	8.43442	2.96359	2.62778	11.4286	8.0707	4.60593	7.91651	7.54671	6.53773	4.28248	7.10592	3.91035	4.88558
C1orf21	0.113381	0.339109	0.107229	0.010054	0.001765	0.001484	0.01966	0.003776	0	0.007132	0.014617	0	0.061326	0.039645	0.007578	0.052323
C1orf210	0.582285	0.343691	0.607856	0	0	0	0	0	0.048221	0	0	0	0	0.047973	0.02064	0.214261
C1orf216	0.428582	1.25193	2.56476	0.459203	0.015001	0.006283	1.13113	0.532545	0.312102	1.23438	0.401045	0.17238	2.79702	0.520895	0.02139	0.194046
C1orf226	0	0	0	0	0	0.056457	0.198914	0	0.14984	0	0.045842	0	0.051415	0	0	0
C1orf232	0.287424	0	0	0	0	0	0	0	0.035826	0	0	0	0.098433	0	0	0.159271
C1orf35	3.02509	5.38913	9.37996	6.05019	1.08179	0.847334	7.21378	7.43654	6.01253	9.73199	7.2458	7.06708	22.3922	6.47204	3.25436	3.81051
C1orf43	6.95352	0	14.0953	26.013	23.7381	21.7711	53.8602	41.2704	76.0633	59.3729	94.1445	87.5298	105.792	29.3226	56.4795	57.1948
C1orf50	0	0.707681	0.328153	0.344627	0.251439	0.185831	0.683392	0.549332	0.609125	0.618789	0.735853	0.672879	0.813001	0.496203	0.280058	0.265481
C1orf52	0.359194	0.731675	0.775781	1.39659	0.58713	0.746912	1.49708	1.95187	1.56712	2.14464	2.09822	1.41223	4.41761	1.1793	1.08102	1.65507
C1orf53	0	0	0	0.904873	0	0.173936	0.2289	0.772879	0.607867	0.722278	0.417262	0.853646	5.80271	1.04482	0.074038	0.677161
C1orf54	0.179782	2.40344	0.150859	0	0.072047	0.044976	0.911709	0.0581	0.089479	0.319599	0.512496	0.35273	1.23329	0.089082	0.051046	0.662814
C1orf56	0.364797	0	0.509287	0.033831	0.079148	0	0.116701	0.101572	0.053889	0.198252	0.134168	0.217039	1.10071	0.052512	0.014446	0.364991
C1orf68	0	0	0	0	0	0	0	0	0	0	0	0	0	0	0	0.143053
C1orf74	0	0.319912	0.189216	0.30656	0.008016	0.006729	0.453656	0.239346	0.073508	0.891788	0.148955	0.105483	0.68699	0.218924	0.022908	0.066756
C1orf87	0	0	0	0	0	0	0	0	0	0	0	0	0	0	0	0
C1orf94	0	0	0	0	0	0	0	0	0	0	0	0	0	0	0	0.017498
C1QA	0.78477	2.60679	0	2.24439	0	0.01787	0.141688	0.208168	0.818047	1.10079	0	0.175214	0.537549	1.7363	0.21297	0.355769
C1QB	0	2.80555	0	0.066662	0	0	0	0	0	0.084208	0	0	0	0.496122	0	0.078846
C1QBP	10.0532	10.0839	21.7958	31.7349	14.6781	16.7816	30.1498	36.4146	26.4646	92.2442	22.1633	19.6071	12.7988	21.9546	17.2736	19.0399
C1QC	0.792869	0	0	2.89862	0	0.016541	0.306065	0.224589	0.625373	1.17551	0.161396	0.227031	0.769913	1.47514	0.309759	0.512078
C1QL1	0.093929	0.221788	0.548746	0.021546	0.014062	0	0	0.045368	0	0	0.114823	0.045998	0	0.092834	0	0.621965
C1QL2	2.60864	0.599284	0	0	0.043255	0	0	0	0	0	0	0	0	0.017864	0.061558	0.179607
C1QL3	0	0	0	0	0.008397	0	0.055833	0.04065	0.055883	0.066569	0	0.013778	0.019425	0.055527	0.023935	0.093072
C1QL4	0.230232	0	0.13645	0	0.029421	0	0	0	0.016305	0	0	0	0	0	0.041895	0.398331
C1QTNF1	0	0	1.01143	0	0	0	0	0	0.028586	0	0	0	0.118282	0	0.048928	0.190566
C1QTNF12	0	1.43923	0	0.247657	0.445539	0.175526	1.13751	0.200716	1.71323	0.045334	0.623876	1.08812	2.45221	0.229113	1.91459	1.70756
C1QTNF2	0.788129	1.66368	0.41956	0	0	0	0	0	0.027889	0	0	0	0	0	0.02389	0.030965
C1QTNF3	0	0	0	0	0	0	0.02244	0	0	0	0	0.008302	0	0.011892	0.014423	0.074732
C1QTNF4	5.31195	6.63462	3.40683	0.118485	0.386558	0.064449	0.954588	0.099766	0.871642	0.122108	0.661822	0.303239	4.4625	0.255098	0.789977	1.7088
C1QTNF5	0	0.670891	2.13971	0	0	0	0	0	0	0	0	0	0	0	0	0
C1QTNF6	0	0	1.27075	0.139801	0.006743	0.011302	0.110975	0.029162	0.144552	0.06688	0.097155	0.018865	0	0.04461	0.028859	0.13061
C1QTNF7	0	0	0	0	0	0	0	0	0	0	0	0	0	0	0	0
C1QTNF8	0	0.426869	0	0	0	0	0	0	0.028191	0	0	0	0	0	0.056364	0
C1QTNF9	0	0	0	0	0	0.018658	0	0.018008	0.07418	0	0.02286	0	0	0	0	0.020711
C1QTNF9B	0.436517	0	0	0	0	0	0	0	0	0	0	0	0	0	0.053133	0.047717
C1R	0	0	14.836	0	0	0	0	0	0	0	0	0	0.498319	0	0	0
C1RL	0	0	0	0	0	0	0	0	0	0	0	0	0	0	0	0
C1S	0	0.551925	3.76936	0	0.039026	0.036988	0.405775	0	0.096293	0	0.200528	0	0.736852	0.083415	0.264025	0.278119
C2	0.036209	0	0.200663	0	0.010807	0.027104	0.204502	0.10734	0	0.165593	0.106631	0.070051	0.203586	0.114085	0.08034	0.044641
C20orf141	0	2.68493	0	0	0	0	0	0	0	0	0	0	0	0	0	0
C20orf144	0	1.80566	0	0	0	0	0.369556	0	0	0	0	0	0	0	0.339451	0
C20orf173	0.081644	0	0	0	0	0	0.054085	0	0	0	0	0	0	0	0	0
C20orf194	0.413835	0.14908	1.05697	0.004074	0.005328	0	0.035574	0.008599	0.013333	0.072385	0.005508	0.00877	0.236079	0.017644	0	0.034528
C20orf202	0	0	0	0	0.171621	0.099183	0.262405	0.085189	0.08765	0.18267	0.512541	0.216027	0.57635	0.021794	0.131325	0.170371
C20orf203	0.889244	1.11077	0	0	0.036606	0.003074	0.026239	0	0.03444	0.007274	0.007561	0.006022	0	0	0.026159	0.350305
C20orf204	0	0	1.51818	0	0	0.605173	0	0.117825	5.56256	0	0.894545	1.1314	8.63596	0	4.46177	7.9226
C20orf27	6.063	9.62117	16.1888	28.9439	9.87901	9.30474	28.6508	21.4627	43.3375	35.9495	43.2031	39.7845	26.7834	19.2676	35.8874	38.2742
C20orf85	0	0	0	0	0	0	0	0	0	0	0	0	0	0	0	0
C20orf96	0.974006	2.4202	2.65736	0.282632	0	0	0.779413	0.19832	0.203855	0.637201	0.250616	0.175824	1.09139	0.354976	0.065435	0.113232
C21orf58	0.421128	1.14391	0	0.42734	2.05363	1.75412	5.11402	1.00659	4.80885	0.893359	5.79608	3.85767	11.9832	0.881512	3.10958	3.68131
C21orf62	0.155284	0.444272	0.090246	0	0	0.003895	0.030949	0	0.046423	0.018437	0.019154	0.022361	0	0	0	0.117796
C21orf91	0.396007	0.22054	1.31243	0.295645	0.165668	0.19998	1.10556	0.562643	0.1993	0.713319	0.727331	0.721237	1.31059	0.308544	0.138138	0.134167
C22orf15	0	2.40942	0	0	0.028243	0	0.123381	0	0	0	0	0	0	0	0.079552	0.244599
C22orf23	0	0	0	0	0	0	0.251811	0	0.227471	0.146532	0.867337	0.199047	0.098	0	0.143755	0.316721
C22orf31	0	0	0	0	0.124	0	0	0	0	0	0	0	0	0	0	0
C22orf39	0.672118	0.655414	1.72142	6.23303	1.36526	1.47259	4.2249	6.50457	4.55956	9.79975	5.31124	5.34339	6.94343	4.3616	2.38751	3.00887
C22orf42	0	0	0	0	0	0	0	0	0	0	0	0	0	0	0	0
C2CD2	0	0.915677	0.90566	0.05679	0.024748	0.016814	0.081009	0.049713	0.076597	0.090132	0.21739	0.069955	0.975573	0.035232	0.051344	0.053857
C2CD2L	0	0.992121	0.553112	1.64674	3.45983	2.50388	7.18702	3.39256	7.66047	4.15546	9.53744	7.69845	6.93692	3.86155	5.79809	7.37448
C2CD3	0	0	0.503142	0	0	0.156786	2.36971	0	0	0	0.339499	0.491174	0	0	0	0
C2CD4A	0	0.332892	0	0	0.011142	0	0	0	0.027846	0	0	0	0	0	0	0.072127
C2CD4B	0	0	0	0	0.04045	0	0	0	0	0	0	0.02206	0	0	0	0.14913
C2CD4C	0.315619	0.124426	0.138986	0	0	0	0.013879	0	0	0	0	0	0	0	0	0.03468
C2CD4D	0.557085	0.282009	0.099333	0	0.071334	0.019865	0	0.038362	0.078986	0	0	0	0.19158	0.137442	0.287447	0.241238
C2CD5	0.193575	0.229049	1.52527	0.928244	0.307491	0.399206	2.94282	1.37637	0.895456	2.13388	1.70849	1.42068	5.59177	1.46578	0.462792	0.455232
C2CD6	0	0.156127	0	0.004982	0.149824	0.073855	0.340569	0.005257	0.516094	0.006473	0.424028	0.300149	0.121435	0.026962	0.251435	0.28942
C2orf15	0.479065	0.771438	0.762214	0	0.169347	0.021751	0.057547	0	0.194616	0.051505	0.29286	0.213186	0	0.021506	0.09257	0.288215
C2orf16	0.055658	0.289971	0.042587	0.006709	0.002194	0	0.044	0.005312	0.005495	0.004366	0.00909	0.016267	0.041026	0	0.017273	0.04675
C2orf42	0.210914	1.65197	0.545403	0.984826	1.03569	0.998799	3.80989	1.97514	2.07614	2.45767	4.11308	3.74753	5.01352	1.51782	2.1365	2.827
C2orf49	1.09319	0	0.423947	2.04252	3.29392	2.8465	3.36163	2.92231	5.57111	5.03054	8.1797	7.4445	6.71384	2.43256	4.03846	3.42988
C2orf50	0.039162	0.59337	0.045024	0	0.011592	0	0	0	0.011606	0	0	0.02672	0.021638	0	0.026529	0.051522
C2orf66	0	0	0	0.025483	0	0	0.073247	0.053629	0.027547	0.098401	0.101519	0.027151	0.076033	0.027418	0	0
C2orf68	0.213643	0.335035	0.804158	0.648225	0.272604	0.204896	2.19878	1.34243	1.35361	1.67713	2.98558	1.91503	6.22418	0.946718	0.730425	0.646485
C2orf69	0.313563	0.659443	0.818634	3.40197	1.29114	1.3056	3.02122	3.35928	2.36954	5.16625	3.84904	2.99195	3.29253	2.84914	1.55055	1.55906
C2orf72	0	0	0	0	0	0	0	0	0	0	0	0	0	0	0.007519	0.119853
C2orf73	0	0	0	0	0	0	0	0	0	0	0	0	0	0	0	0
C2orf74	0	0	1.95066	0.979262	0.057965	0.095859	0.44291	1.44353	1.00243	3.04426	2.38577	1.30888	1.78361	1.71465	0.530402	0.318501
C2orf76	0.666604	1.02175	0.112188	1.07764	0.421583	0.517355	1.41167	1.1655	1.89298	2.1349	2.76809	2.12706	3.15251	0.694612	0.966021	1.8084
C2orf78	0	0.659501	0	0	0.012748	0	0	0	0	0	0	0	0.073936	0	0	0.035353
C2orf80	0	0	0	0	0	0	0	0	0	0	0	0	0	0	0	0
C2orf81	0.828685	0.814788	0.904773	0	0.043335	0	0	0	0	0.021443	0	0.114262	0	0.053691	0	0.621777
C2orf88	0	0	0	8.42548	4.14255	4.03884	8.02736	9.00258	0.52177	20.4214	6.47652	5.75875	5.9648	8.15115	1.55302	2.03834
C2orf92	0	2.07571	0.142282	0	0	0	0	0	0.041917	0	0.102419	0	0.233182	0.041794	0	0.093201
C3	0.144398	0	1.28684	0.229239	0.018301	0.035933	0.333147	0.131437	0.064366	0.208324	0.337435	0.370441	1.236	0.198022	0.044293	0.310247
C3AR1	0.225921	1.22482	0.667816	0.111208	0.016772	0	0.322825	0.07218	0.065199	0.033291	0.023045	0.009188	0.727126	0.00925	0.055867	0.041358
C3orf14	0	0.961146	1.53823	0.516748	0.08394	0	0.272314	0.270397	0	0.898389	0.249223	0.135154	0.834259	0.274866	0.234526	0.076458
[truncated: 17,617 more rows]
