# Supplementary material for: Engineering synthetic signaling receptors to enable erythropoietin-free erythropoiesis
Source: Nat Commun. 2025 Jan 29;16:1140. doi: 10.1038/s41467-025-56239-5 (PMC11779867; doi:10.1038/s41467-025-56239-5)
Supplement: Supplementary file 5 — Supplementary Data 3 [file 41467_2025_56239_MOESM5_ESM.xlsx]

## Sheet: Mock_d0_v_Mock_d14
Gene_set	Term	P-value	Adjusted P-value	Odds Ratio	Combined Score	Genes
GO_Biological_Process_2023	Hydrogen Peroxide Catabolic Process (GO:0042744)	1.198e-09	3.66589e-07	147.667	3033.46	HBM;HBG2;HBB;HBA1;MPO		P<0.01
GO_Biological_Process_2023	One-Carbon Compound Transport (GO:0019755)	1.7088e-06	0.000177732	55.8738	741.988	HBG2;HBB;SLC4A1;HBA1		P<0.05
GO_Biological_Process_2023	Oxygen Transport (GO:0015671)	1.74247e-06	0.000177732	181.851	2411.38	HBG2;HBB;HBA1
GO_Biological_Process_2023	Carbon Dioxide Transport (GO:0015670)	2.39168e-06	0.000182964	159.112	2059.46	HBG2;HBB;HBA1
GO_Biological_Process_2023	Erythrocyte Differentiation (GO:0030218)	6.739e-06	0.000343689	38.4638	458.011	ALAS2;TSPO2;AHSP;KLF1
GO_Biological_Process_2023	Gas Transport (GO:0015669)	6.54897e-06	0.000343689	106.053	1265.87	HBG2;HBB;HBA1
GO_Cellular_Component_2023	Endocytic Vesicle Lumen (GO:0071682)	1.8942e-05	0.00136383	70.6809	768.593	HBB;HBA1;MPO
GO_Molecular_Function_2023	Heme Binding (GO:0020037)	6.60236e-05	0.00528189	20.814	200.345	HBM;HBG2;HBB;HBA1
GO_Biological_Process_2023	Extracellular Matrix Disassembly (GO:0022617)	0.000181142	0.00791365	30.9948	267.058	MMP2;CAPG;TPSAB1
GO_Biological_Process_2023	Cellular Component Disassembly (GO:0022411)	0.000206893	0.00791365	29.5502	250.684	MMP2;CAPG;TPSAB1
GO_Biological_Process_2023	Positive Regulation Of Cell Death (GO:0010942)	0.000265263	0.00901893	27.0299	222.585	HBG2;HBB;HBA1
GO_Cellular_Component_2023	Collagen-Containing Extracellular Matrix (GO:0062023)	0.000321321	0.0115676	7.27632	58.5239	LGALS1;MMP2;TGFBI;TPSAB1;SOD3;PF4
GO_Biological_Process_2023	Myeloid Cell Differentiation (GO:0030099)	0.000391159	0.0119695	23.5177	184.529	ALAS2;AHSP;KLF1
GO_Biological_Process_2023	Regulation Of Cell Death (GO:0010941)	0.000433069	0.0120472	22.6755	175.613	HBG2;HBB;HBA1
GO_Biological_Process_2023	Extracellular Matrix Organization (GO:0030198)	0.000973382	0.0248212	9.99899	69.3403	MMP2;CAPG;TGFBI;TPSAB1
GO_Cellular_Component_2023	Azurophil Granule Lumen (GO:0035578)	0.00143529	0.034447	14.7432	96.5147	PRSS57;RNASE2;MPO
GO_Cellular_Component_2023	Phagocytic Vesicle (GO:0045335)	0.00200468	0.0360842	13.064	81.1574	CYBA;TCIRG1;MPO
GO_Cellular_Component_2023	Phagocytic Vesicle Membrane (GO:0030670)	0.00566179	0.0520783	19.2897	99.8053	CYBA;TCIRG1
GO_Cellular_Component_2023	Azurophil Granule (GO:0042582)	0.00685512	0.0520783	8.31383	41.4258	PRSS57;RNASE2;MPO
GO_Cellular_Component_2023	Endocytic Vesicle Membrane (GO:0030666)	0.0073519	0.0520783	8.09902	39.7888	STAB1;CYBA;TCIRG1
GO_Cellular_Component_2023	Vacuolar Lumen (GO:0005775)	0.0076081	0.0520783	7.99569	39.0073	PRSS57;RNASE2;MPO
GO_Cellular_Component_2023	Tertiary Granule (GO:0070820)	0.00773816	0.0520783	7.945	38.6254	HBB;CYBA;TCIRG1
GO_Cellular_Component_2023	Secretory Granule Lumen (GO:0034774)	0.0079564	0.0520783	5.47324	26.4564	PRSS57;RNASE2;MPO;PF4
GO_Cellular_Component_2023	Cytoskeleton (GO:0005856)	0.00365302	0.0520783	4.45125	24.9813	EPB42;SLC4A1;CAPG;VIM;ANK1;MYO1F
GO_Biological_Process_2023	Superoxide Metabolic Process (GO:0006801)	0.00326501	0.0768533	25.9349	148.464	CYBA;SOD3
GO_Cellular_Component_2023	Endocytic Vesicle (GO:0030139)	0.0129599	0.0777593	6.53412	28.3966	STAB1;HBB;HBA1
GO_Biological_Process_2023	Positive Regulation Of Biosynthetic Process (GO:0009891)	0.00541877	0.118439	19.75	103.053	CYBA;VIM
GO_Biological_Process_2023	Response To Hydrogen Peroxide (GO:0042542)	0.00590974	0.120559	18.8504	96.7242	HBB;HBA1
GO_Cellular_Component_2023	Primary Lysosome (GO:0005766)	0.0247259	0.136944	45.2177	167.301	MPO
GO_Biological_Process_2023	Actin Polymerization Or Depolymerization (GO:0008154)	0.00778121	0.148816	16.2574	78.9464	CAPG;FHDC1
GO_Biological_Process_2023	Defense Response To Protozoan (GO:0042832)	0.0368633	0.149125	29.0612	95.9177	PF4
GO_Biological_Process_2023	Intracellular Sterol Transport (GO:0032366)	0.0368633	0.149125	29.0612	95.9177	TSPO2
GO_Biological_Process_2023	Positive Regulation Of Collagen Biosynthetic Process (GO:0032967)	0.0368633	0.149125	29.0612	95.9177	VIM
GO_Biological_Process_2023	Intracellular Cholesterol Transport (GO:0032367)	0.0392729	0.149125	27.1224	87.8013	TSPO2
GO_Biological_Process_2023	Positive Regulation Of Collagen Metabolic Process (GO:0010714)	0.0392729	0.149125	27.1224	87.8013	VIM
GO_Biological_Process_2023	Regulation Of Cardiac Muscle Contraction By Regulation Of The Release Of Sequestered Calcium Ion (GO:0010881)	0.0392729	0.149125	27.1224	87.8013	CLIC2
GO_Biological_Process_2023	Carbohydrate Derivative Catabolic Process (GO:1901136)	0.0416767	0.149125	25.426	80.7992	BPGM
GO_Biological_Process_2023	Positive Regulation Of Macrophage Derived Foam Cell Differentiation (GO:0010744)	0.0416767	0.149125	25.426	80.7992	PF4
GO_Biological_Process_2023	Triglyceride Biosynthetic Process (GO:0019432)	0.0416767	0.149125	25.426	80.7992	LPIN2
GO_Biological_Process_2023	Lysosomal Lumen Acidification (GO:0007042)	0.0440745	0.149125	23.9292	74.7039	TCIRG1
GO_Biological_Process_2023	Regulation Of Collagen Biosynthetic Process (GO:0032965)	0.0440745	0.149125	23.9292	74.7039	VIM
GO_Biological_Process_2023	Vesicle Transport Along Actin Filament (GO:0030050)	0.0440745	0.149125	23.9292	74.7039	MYO1F
GO_Biological_Process_2023	Actin Filament Capping (GO:0051693)	0.0440745	0.149125	23.9292	74.7039	CAPG
GO_Biological_Process_2023	Renal Absorption (GO:0070293)	0.0440745	0.149125	23.9292	74.7039	HBB
GO_Biological_Process_2023	Neuromuscular Synaptic Transmission (GO:0007274)	0.0440745	0.149125	23.9292	74.7039	TSPOAP1
GO_Biological_Process_2023	Barbed-End Actin Filament Capping (GO:0051016)	0.0440745	0.149125	23.9292	74.7039	CAPG
GO_Biological_Process_2023	Monoatomic Anion Transport (GO:0006820)	0.00895516	0.149125	15.072	71.0723	SLC4A1;CLIC2
GO_Biological_Process_2023	Superoxide Anion Generation (GO:0042554)	0.0464665	0.149125	22.5986	69.3558	CYBA
GO_Biological_Process_2023	Heme Biosynthetic Process (GO:0006783)	0.0464665	0.149125	22.5986	69.3558	ALAS2
GO_Biological_Process_2023	Regulation Of Megakaryocyte Differentiation (GO:0045652)	0.0464665	0.149125	22.5986	69.3558	PF4
GO_Biological_Process_2023	Bicarbonate Transport (GO:0015701)	0.0464665	0.149125	22.5986	69.3558	SLC4A1
GO_Biological_Process_2023	Inorganic Anion Transport (GO:0015698)	0.00926028	0.149125	14.8021	69.3037	SLC4A1;CLIC2
GO_Biological_Process_2023	Cell Projection Organization (GO:0030030)	0.0488525	0.149125	21.4082	64.6301	CAPG
GO_Biological_Process_2023	Monocarboxylic Acid Catabolic Process (GO:0072329)	0.0488525	0.149125	21.4082	64.6301	LPIN2
GO_Biological_Process_2023	Actin Filament-Based Transport (GO:0099515)	0.0488525	0.149125	21.4082	64.6301	MYO1F
GO_Biological_Process_2023	Intracellular Monoatomic Ion Homeostasis (GO:0006873)	0.0488525	0.149125	21.4082	64.6301	SLC4A1
GO_Biological_Process_2023	Positive Regulation Of Vascular Associated Smooth Muscle Cell Proliferation (GO:1904707)	0.0488525	0.149125	21.4082	64.6301	MMP2
GO_Biological_Process_2023	Regulation Of Cardiac Muscle Contraction By Calcium Ion Signaling (GO:0010882)	0.0488525	0.149125	21.4082	64.6301	CLIC2
GO_Biological_Process_2023	Peptide Catabolic Process (GO:0043171)	0.0512328	0.149125	20.3367	60.4281	ANPEP
GO_Biological_Process_2023	Negative Regulation Of Interleukin-2 Production (GO:0032703)	0.0512328	0.149125	20.3367	60.4281	HOMER3
GO_Biological_Process_2023	Porphyrin-Containing Compound Biosynthetic Process (GO:0006779)	0.0512328	0.149125	20.3367	60.4281	ALAS2
GO_Biological_Process_2023	Innate Immune Response In Mucosa (GO:0002227)	0.0512328	0.149125	20.3367	60.4281	RNASE2
GO_Biological_Process_2023	Negative Regulation Of Extrinsic Apoptotic Signaling Pathway In Absence Of Ligand (GO:2001240)	0.0536072	0.149125	19.3673	56.6702	PF4
GO_Biological_Process_2023	Regulation Of Release Of Sequestered Calcium Ion Into Cytosol By Sarcoplasmic Reticulum (GO:0010880)	0.0536072	0.149125	19.3673	56.6702	CLIC2
GO_Biological_Process_2023	Negative Regulation Of Myeloid Cell Differentiation (GO:0045638)	0.0536072	0.149125	19.3673	56.6702	PF4
GO_Biological_Process_2023	Acylglycerol Biosynthetic Process (GO:0046463)	0.0536072	0.149125	19.3673	56.6702	LPIN2
GO_Biological_Process_2023	Negative Regulation Of Signal Transduction In Absence Of Ligand (GO:1901099)	0.0536072	0.149125	19.3673	56.6702	PF4
GO_Biological_Process_2023	Positive Regulation Of Viral Life Cycle (GO:1903902)	0.0536072	0.149125	19.3673	56.6702	LGALS1
GO_Biological_Process_2023	Negative Regulation Of Cell Adhesion (GO:0007162)	0.0140048	0.149125	11.8333	50.5089	PLXND1;TGFBI
GO_Biological_Process_2023	Chloride Transport (GO:0006821)	0.0159058	0.149125	11.0417	45.7243	SLC4A1;CLIC2
GO_Biological_Process_2023	Negative Regulation Of Blood Vessel Morphogenesis (GO:2000181)	0.0159058	0.149125	11.0417	45.7243	STAB1;PF4
GO_Biological_Process_2023	Hydrogen Peroxide Biosynthetic Process (GO:0050665)	0.0124388	0.149125	101.765	446.438	CYBA
GO_Biological_Process_2023	Induction Of Bacterial Agglutination (GO:0043152)	0.0124388	0.149125	101.765	446.438	RNASE2
GO_Biological_Process_2023	Positive Regulation Of Tumor Necrosis Factor Production (GO:0032760)	0.0162986	0.149125	10.8958	44.8546	CYBA;PF4
GO_Biological_Process_2023	Positive Regulation Of Tumor Necrosis Factor Superfamily Cytokine Production (GO:1903557)	0.0179109	0.149125	10.349	41.6271	CYBA;PF4
GO_Biological_Process_2023	Negative Regulation Of Angiogenesis (GO:0016525)	0.0195881	0.149125	9.85417	38.7548	STAB1;PF4
GO_Biological_Process_2023	Protein Catabolic Process In The Vacuole (GO:0007039)	0.0149083	0.149125	81.4082	342.39	TCIRG1
GO_Biological_Process_2023	Positive Regulation Of Leukocyte Differentiation (GO:1902107)	0.0173717	0.149125	67.8367	274.936	LGALS1
GO_Biological_Process_2023	Cytochrome Complex Assembly (GO:0017004)	0.0173717	0.149125	67.8367	274.936	CYBA
GO_Biological_Process_2023	Extracellular Structure Organization (GO:0043062)	0.0304217	0.149125	7.72702	26.9874	MMP2;TGFBI
GO_Biological_Process_2023	External Encapsulating Structure Organization (GO:0045229)	0.0309363	0.149125	7.65509	26.6078	MMP2;TGFBI
GO_Biological_Process_2023	Defense Response To Bacterium (GO:0042742)	0.0144198	0.149125	6.27151	26.5859	STAB1;RNASE2;MPO
GO_Biological_Process_2023	Regulation Of Angiogenesis (GO:0045765)	0.0146086	0.149125	6.24015	26.3718	PLXND1;STAB1;PF4
GO_Biological_Process_2023	Cytoskeleton Organization (GO:0007010)	0.0314545	0.149125	7.58448	26.2363	ANK1;ARHGAP4
GO_Biological_Process_2023	Proteolysis (GO:0006508)	0.00923269	0.149125	5.23446	24.5235	MMP2;ANPEP;PRSS57;TPSAB1
GO_Biological_Process_2023	Cellular Response To Molecule Of Bacterial Origin (GO:0071219)	0.0346351	0.149125	7.18659	24.1677	VIM;PF4
GO_Biological_Process_2023	Cellular Response To Muramyl Dipeptide (GO:0071225)	0.0198292	0.149125	58.1429	227.955	VIM
GO_Biological_Process_2023	Semaphorin-Plexin Signaling Pathway Involved In Axon Guidance (GO:1902287)	0.0198292	0.149125	58.1429	227.955	PLXND1
GO_Biological_Process_2023	Cellular Response To Lipopolysaccharide (GO:0071222)	0.0384971	0.149125	6.77186	22.0571	VIM;PF4
GO_Biological_Process_2023	Positive Regulation Of Defense Response (GO:0031349)	0.0384971	0.149125	6.77186	22.0571	LGALS1;CYBA
GO_Biological_Process_2023	Regulation Of Tumor Necrosis Factor Production (GO:0032680)	0.0402006	0.149125	6.60833	21.2384	CYBA;PF4
GO_Biological_Process_2023	Regulation Of Store-Operated Calcium Entry (GO:2001256)	0.0222806	0.149125	50.8724	193.521	HOMER3
GO_Biological_Process_2023	Protein Localization To Plasma Membrane (GO:0072659)	0.0460803	0.149125	6.11574	18.8204	ANK1;PRAM1
GO_Biological_Process_2023	Protein Localization To Cell Periphery (GO:1990778)	0.0491322	0.149125	5.89583	17.7656	ANK1;PRAM1
GO_Biological_Process_2023	Actin Filament Organization (GO:0007015)	0.0503732	0.149125	5.81221	17.3686	CAPG;MYO1F
GO_Biological_Process_2023	Regulation Of Cell Adhesion (GO:0030155)	0.0503732	0.149125	5.81221	17.3686	PLXND1;TGFBI
GO_Biological_Process_2023	Regulation Of Dendritic Cell Differentiation (GO:2001198)	0.0247259	0.149125	45.2177	167.301	LGALS1
GO_Biological_Process_2023	Cellular Response To UV-A (GO:0071492)	0.0247259	0.149125	45.2177	167.301	MMP2
GO_Biological_Process_2023	Positive Regulation Of Macrophage Differentiation (GO:0045651)	0.0247259	0.149125	45.2177	167.301	PF4
GO_Biological_Process_2023	Regulation Of Toll-Like Receptor 2 Signaling Pathway (GO:0034135)	0.0247259	0.149125	45.2177	167.301	CYBA
GO_Biological_Process_2023	Removal Of Superoxide Radicals (GO:0019430)	0.0247259	0.149125	45.2177	167.301	SOD3
GO_Biological_Process_2023	Defense Response To Symbiont (GO:0140546)	0.0528891	0.149125	5.65183	16.6139	IFIT1B;RNASE2
GO_Biological_Process_2023	Positive Regulation Of Cellular Process (GO:0048522)	0.0160302	0.149125	3.65233	15.0961	HBG2;CLEC11A;HBB;HBA1;TCIRG1
GO_Biological_Process_2023	Erythrocyte Development (GO:0048821)	0.0271653	0.149125	40.6939	146.735	ALAS2
GO_Biological_Process_2023	Cellular Response To Superoxide (GO:0071451)	0.0271653	0.149125	40.6939	146.735	SOD3
GO_Biological_Process_2023	Negative Regulation Of Release Of Sequestered Calcium Ion Into Cytosol (GO:0051280)	0.0271653	0.149125	40.6939	146.735	CLIC2
GO_Biological_Process_2023	Negative Regulation Of Ryanodine-Sensitive Calcium-Release Channel Activity (GO:0060315)	0.0271653	0.149125	40.6939	146.735	CLIC2
GO_Biological_Process_2023	Negative Regulation Of calcineurin-NFAT Signaling Cascade (GO:0070885)	0.0271653	0.149125	40.6939	146.735	HOMER3
GO_Biological_Process_2023	Negative Regulation Of Calcineurin-Mediated Signaling (GO:0106057)	0.0271653	0.149125	40.6939	146.735	HOMER3
GO_Biological_Process_2023	G Protein-Coupled Glutamate Receptor Signaling Pathway (GO:0007216)	0.0295988	0.149125	36.9926	130.215	HOMER3
GO_Biological_Process_2023	Positive Regulation By Symbiont Of Entry Into Host (GO:0075294)	0.0295988	0.149125	36.9926	130.215	LGALS1
GO_Biological_Process_2023	Positive Regulation Of Reactive Oxygen Species Biosynthetic Process (GO:1903428)	0.0295988	0.149125	36.9926	130.215	CYBA
GO_Biological_Process_2023	Response To Muramyl Dipeptide (GO:0032495)	0.0295988	0.149125	36.9926	130.215	VIM
GO_Biological_Process_2023	Semaphorin-Plexin Signaling Pathway Involved In Neuron Projection Guidance (GO:1902285)	0.0295988	0.149125	36.9926	130.215	PLXND1
GO_Biological_Process_2023	Positive Regulation Of Viral Entry Into Host Cell (GO:0046598)	0.0295988	0.149125	36.9926	130.215	LGALS1
GO_Biological_Process_2023	Low-Density Lipoprotein Particle Remodeling (GO:0034374)	0.0295988	0.149125	36.9926	130.215	MPO
GO_Biological_Process_2023	Negative Regulation Of Receptor Internalization (GO:0002091)	0.0320262	0.149125	33.9082	116.685	ANKRD13D
GO_Biological_Process_2023	Response To UV-A (GO:0070141)	0.0320262	0.149125	33.9082	116.685	MMP2
GO_Biological_Process_2023	Killing By Host Of Symbiont Cells (GO:0051873)	0.0320262	0.149125	33.9082	116.685	PF4
GO_Biological_Process_2023	Stress Fiber Assembly (GO:0043149)	0.0344477	0.149125	31.2983	105.422	FHDC1
GO_Biological_Process_2023	Regulation Of MHC Class II Biosynthetic Process (GO:0045346)	0.0344477	0.149125	31.2983	105.422	PF4
GO_Biological_Process_2023	Contractile Actin Filament Bundle Assembly (GO:0030038)	0.0344477	0.149125	31.2983	105.422	FHDC1
GO_Biological_Process_2023	Regulation Of Macrophage Differentiation (GO:0045649)	0.0344477	0.149125	31.2983	105.422	PF4
GO_Biological_Process_2023	Response To Reactive Oxygen Species (GO:0000302)	0.0118651	0.149125	12.9466	57.4073	HBB;HBA1
GO_Biological_Process_2023	Cellular Lipid Catabolic Process (GO:0044242)	0.0559758	0.154312	18.4861	53.2924	LPIN2
GO_Biological_Process_2023	Positive Regulation Of Response To External Stimulus (GO:0032103)	0.0573977	0.156819	5.39134	15.4071	LGALS1;CYBA
GO_Biological_Process_2023	Regulation Of Ryanodine-Sensitive Calcium-Release Channel Activity (GO:0060314)	0.0583386	0.157979	17.6815	50.2417	CLIC2
GO_Biological_Process_2023	Response To Lipopolysaccharide (GO:0032496)	0.0600326	0.16114	5.25292	14.7758	VIM;PF4
GO_Biological_Process_2023	Regulation Of Lysosomal Lumen pH (GO:0035751)	0.0606955	0.161371	16.9439	47.4748	TCIRG1
GO_Biological_Process_2023	Regulation Of Reactive Oxygen Species Biosynthetic Process (GO:1903426)	0.0630467	0.161371	16.2653	44.9553	CYBA
GO_Biological_Process_2023	Negative Regulation Of Receptor-Mediated Endocytosis (GO:0048261)	0.0630467	0.161371	16.2653	44.9553	ANKRD13D
GO_Biological_Process_2023	Nucleic Acid Phosphodiester Bond Hydrolysis (GO:0090305)	0.0630467	0.161371	16.2653	44.9553	RNASE2
GO_Biological_Process_2023	Peptide Cross-Linking (GO:0018149)	0.0653922	0.161371	15.6389	42.6529	EPB42
GO_Biological_Process_2023	Regulation Of Extrinsic Apoptotic Signaling Pathway In Absence Of Ligand (GO:2001239)	0.0653922	0.161371	15.6389	42.6529	PF4
GO_Biological_Process_2023	Positive Regulation Of Nitric Oxide Biosynthetic Process (GO:0045429)	0.0653922	0.161371	15.6389	42.6529	HBB
GO_Biological_Process_2023	Myeloid Cell Development (GO:0061515)	0.0653922	0.161371	15.6389	42.6529	ALAS2
GO_Biological_Process_2023	Amino Acid Import Across Plasma Membrane (GO:0089718)	0.0653922	0.161371	15.6389	42.6529	TSPO2
GO_Biological_Process_2023	Nitrogen Compound Transport (GO:0071705)	0.0627089	0.161371	5.12138	14.1824	HBB;HBA1
GO_Biological_Process_2023	RNA Phosphodiester Bond Hydrolysis (GO:0090501)	0.0677318	0.161921	15.059	40.5417	RNASE2
GO_Biological_Process_2023	Positive Regulation Of Nitric Oxide Metabolic Process (GO:1904407)	0.0677318	0.161921	15.059	40.5417	HBB
GO_Biological_Process_2023	Mucosal Immune Response (GO:0002385)	0.0677318	0.161921	15.059	40.5417	RNASE2
GO_Biological_Process_2023	Negative Regulation Of Cation Channel Activity (GO:2001258)	0.0677318	0.161921	15.059	40.5417	CLIC2
GO_Molecular_Function_2023	Chloride Transmembrane Transporter Activity (GO:0015108)	0.00835883	0.162881	15.6423	74.8396	SLC4A1;CLIC2
GO_Molecular_Function_2023	ATPase Binding (GO:0051117)	0.0143765	0.162881	11.6661	49.4894	TCIRG1;ANK1
GO_Molecular_Function_2023	Serine-Type Peptidase Activity (GO:0008236)	0.00538205	0.162881	9.09735	47.5308	MMP2;PRSS57;TPSAB1
GO_Molecular_Function_2023	Hydrolase Activity, Acting On Acid Anhydrides, In Phosphorus-Containing Anhydrides (GO:0016818)	0.0124388	0.162881	101.765	446.438	PHOSPHO1
GO_Molecular_Function_2023	Keratin Filament Binding (GO:1990254)	0.0124388	0.162881	101.765	446.438	VIM
GO_Molecular_Function_2023	Phosphatase Activity (GO:0016791)	0.0183241	0.162881	10.2207	40.878	PHOSPHO1;LPIN2
GO_Molecular_Function_2023	Oxidoreductase Activity, Acting On A Sulfur Group Of Donors, Oxygen As Acceptor (GO:0016670)	0.0149083	0.162881	81.4082	342.39	SELENBP1
GO_Molecular_Function_2023	G Protein-Coupled Glutamate Receptor Binding (GO:0035256)	0.0173717	0.162881	67.8367	274.936	HOMER3
GO_Biological_Process_2023	Positive Regulation Of Cellular Biosynthetic Process (GO:0031328)	0.070273	0.164149	4.79118	12.7224	HBB;VIM
GO_Biological_Process_2023	Vacuolar Acidification (GO:0007035)	0.0700658	0.164149	14.5204	38.5999	TCIRG1
GO_Biological_Process_2023	Lipid Droplet Organization (GO:0034389)	0.0700658	0.164149	14.5204	38.5999	TSPO2
GO_Biological_Process_2023	Regulation Of Vasculature Development (GO:1901342)	0.072394	0.165318	14.019	36.8087	PLXND1
GO_Biological_Process_2023	Regulation Of Macrophage Derived Foam Cell Differentiation (GO:0010743)	0.072394	0.165318	14.019	36.8087	PF4
GO_Biological_Process_2023	Negative Regulation Of Calcium Ion Transmembrane Transporter Activity (GO:1901020)	0.072394	0.165318	14.019	36.8087	CLIC2
GO_Molecular_Function_2023	Low-Density Lipoprotein Particle Binding (GO:0030169)	0.0392729	0.16536	27.1224	87.8013	STAB1
GO_Molecular_Function_2023	CXCR Chemokine Receptor Binding (GO:0045236)	0.0392729	0.16536	27.1224	87.8013	PF4
GO_Molecular_Function_2023	Ubiquitin-Dependent Protein Binding (GO:0140036)	0.0392729	0.16536	27.1224	87.8013	ANKRD13D
GO_Molecular_Function_2023	Metallopeptidase Activity (GO:0008237)	0.0384971	0.16536	6.77186	22.0571	MMP2;ANPEP
GO_Molecular_Function_2023	Serine-Type Endopeptidase Activity (GO:0004252)	0.0390617	0.16536	6.71646	21.7789	MMP2;TPSAB1
GO_Molecular_Function_2023	Semaphorin Receptor Activity (GO:0017154)	0.0247259	0.16536	45.2177	167.301	PLXND1
GO_Molecular_Function_2023	Oxidoreductase Activity, Acting On NAD(P)H, Oxygen As Acceptor (GO:0050664)	0.0295988	0.16536	36.9926	130.215	CYBA
GO_Molecular_Function_2023	Phosphatidate Phosphatase Activity (GO:0008195)	0.0320262	0.16536	33.9082	116.685	LPIN2
GO_Molecular_Function_2023	Ubiquitination-Like Modification-Dependent Protein Binding (GO:0140035)	0.0320262	0.16536	33.9082	116.685	ANKRD13D
GO_Molecular_Function_2023	Solute:Inorganic Anion Antiporter Activity (GO:0005452)	0.0344477	0.16536	31.2983	105.422	SLC4A1
GO_Biological_Process_2023	Organic Cation Transport (GO:0015695)	0.0747165	0.166885	13.551	35.1521	TSPO2
GO_Biological_Process_2023	Actin Filament Polymerization (GO:0030041)	0.0747165	0.166885	13.551	35.1521	FHDC1
GO_Biological_Process_2023	Endodermal Cell Differentiation (GO:0035987)	0.0747165	0.166885	13.551	35.1521	MMP2
GO_Cellular_Component_2023	Secretory Granule Membrane (GO:0030667)	0.0325326	0.16731	4.54995	15.5859	ANPEP;CYBA;TCIRG1
GO_Molecular_Function_2023	Glutamate Receptor Binding (GO:0035254)	0.0440745	0.167903	23.9292	74.7039	HOMER3
GO_Molecular_Function_2023	Ankyrin Binding (GO:0030506)	0.0440745	0.167903	23.9292	74.7039	SLC4A1
GO_Biological_Process_2023	Intracellular pH Reduction (GO:0051452)	0.0770333	0.170813	13.1132	33.616	TCIRG1
GO_Biological_Process_2023	Regulation Of calcineurin-NFAT Signaling Cascade (GO:0070884)	0.0816498	0.177163	12.3173	30.8586	HOMER3
GO_Biological_Process_2023	Semaphorin-Plexin Signaling Pathway (GO:0071526)	0.0816498	0.177163	12.3173	30.8586	PLXND1
GO_Biological_Process_2023	Glutamate Receptor Signaling Pathway (GO:0007215)	0.0839496	0.177163	11.9544	29.6174	HOMER3
GO_Biological_Process_2023	Platelet Aggregation (GO:0070527)	0.0839496	0.177163	11.9544	29.6174	HBB
GO_Biological_Process_2023	Endoderm Formation (GO:0001706)	0.0839496	0.177163	11.9544	29.6174	MMP2
GO_Biological_Process_2023	Defense Response To Virus (GO:0051607)	0.0810402	0.177163	4.40352	11.0652	IFIT1B;RNASE2
GO_Biological_Process_2023	Protein Localization To Membrane (GO:0072657)	0.0832524	0.177163	4.33333	10.7721	ANK1;PRAM1
GO_Biological_Process_2023	Organelle Organization (GO:0006996)	0.0865742	0.180216	3.00461	7.35155	TSPO2;ANK1;ARHGAP4
GO_Biological_Process_2023	Regulation Of Receptor Internalization (GO:0002090)	0.0862437	0.180216	11.6122	28.4567	ANKRD13D
GO_Biological_Process_2023	Regulation Of Vascular Associated Smooth Muscle Cell Proliferation (GO:1904705)	0.0885322	0.183046	11.2891	27.3692	MMP2
GO_Biological_Process_2023	Positive Regulation Of Axonogenesis (GO:0050772)	0.0908151	0.185263	10.9835	26.3485	PLXND1
GO_Biological_Process_2023	Response To Peptide (GO:1901652)	0.0908151	0.185263	10.9835	26.3485	MMP2
GO_Biological_Process_2023	Positive Regulation Of Pattern Recognition Receptor Signaling Pathway (GO:0062208)	0.0930924	0.186185	10.6939	25.389	CYBA
GO_Biological_Process_2023	Vesicle Cytoskeletal Trafficking (GO:0099518)	0.0930924	0.186185	10.6939	25.389	MYO1F
GO_Biological_Process_2023	Regulation Of Nitric Oxide Biosynthetic Process (GO:0045428)	0.0930924	0.186185	10.6939	25.389	HBB
GO_Biological_Process_2023	Positive Regulation Of Myeloid Leukocyte Differentiation (GO:0002763)	0.0953641	0.188267	10.4192	24.4856	PF4
GO_Biological_Process_2023	Endothelial Cell Migration (GO:0043542)	0.0953641	0.188267	10.4192	24.4856	PLXND1
GO_Biological_Process_2023	Positive Regulation Of Response To Biotic Stimulus (GO:0002833)	0.0976302	0.191505	10.1582	23.6337	CYBA
GO_Molecular_Function_2023	Bicarbonate Transmembrane Transporter Activity (GO:0015106)	0.0536072	0.194462	19.3673	56.6702	SLC4A1
GO_Molecular_Function_2023	Lipoprotein Particle Binding (GO:0071813)	0.0559758	0.194462	18.4861	53.2924	STAB1
GO_Molecular_Function_2023	Monoatomic Anion Transmembrane Transporter Activity (GO:0008509)	0.0583386	0.194462	17.6815	50.2417	SLC4A1
GO_Biological_Process_2023	Regulation Of Axonogenesis (GO:0050770)	0.0998908	0.194692	9.90991	22.8292	PLXND1
GO_Biological_Process_2023	Response To Amyloid-Beta (GO:1904645)	0.102146	0.196582	9.67347	22.0686	MMP2
GO_Biological_Process_2023	Ephrin Receptor Signaling Pathway (GO:0048013)	0.102146	0.196582	9.67347	22.0686	MMP2
GO_Biological_Process_2023	Regulation Of Viral Entry Into Host Cell (GO:0046596)	0.104395	0.198416	9.44803	21.3485	LGALS1
GO_Biological_Process_2023	Nucleobase-Containing Compound Catabolic Process (GO:0034655)	0.104395	0.198416	9.44803	21.3485	RNASE2
GO_Biological_Process_2023	Triglyceride Metabolic Process (GO:0006641)	0.106639	0.20143	9.23284	20.6659	LPIN2
GO_Biological_Process_2023	Epithelial Cell Migration (GO:0010631)	0.108878	0.201918	9.02721	20.0181	PLXND1
GO_Biological_Process_2023	Homotypic Cell-Cell Adhesion (GO:0034109)	0.108878	0.201918	9.02721	20.0181	HBB
GO_Biological_Process_2023	Regulation Of mRNA Catabolic Process (GO:0061013)	0.108878	0.201918	9.02721	20.0181	VIM
GO_Biological_Process_2023	Cellular Response To Lipid (GO:0071396)	0.111143	0.20244	3.63643	7.989	VIM;PF4
GO_Biological_Process_2023	Regulation Of Interleukin-2 Production (GO:0032663)	0.111111	0.20244	8.83052	19.4027	HOMER3
GO_Biological_Process_2023	Positive Regulation Of Smooth Muscle Cell Proliferation (GO:0048661)	0.111111	0.20244	8.83052	19.4027	MMP2
GO_Biological_Process_2023	Cellular Defense Response (GO:0006968)	0.113338	0.202815	8.64221	18.8174	TCIRG1
GO_Biological_Process_2023	Chloride Transmembrane Transport (GO:1902476)	0.113338	0.202815	8.64221	18.8174	SLC4A1
GO_Biological_Process_2023	Positive Regulation Of Reactive Oxygen Species Metabolic Process (GO:2000379)	0.113338	0.202815	8.64221	18.8174	CYBA
GO_Biological_Process_2023	Proton Transmembrane Transport (GO:1902600)	0.11556	0.204401	8.46173	18.2601	TCIRG1
GO_Biological_Process_2023	Antibacterial Humoral Response (GO:0019731)	0.11556	0.204401	8.46173	18.2601	RNASE2
GO_Biological_Process_2023	Intracellular Iron Ion Homeostasis (GO:0006879)	0.117777	0.205941	8.28863	17.7291	ALAS2
GO_Biological_Process_2023	Inflammatory Response (GO:0006954)	0.117642	0.205941	3.51068	7.51326	CYBA;PF4
GO_Biological_Process_2023	Regulation Of Release Of Sequestered Calcium Ion Into Cytosol (GO:0051279)	0.119988	0.207436	8.12245	17.2226	CLIC2
GO_Biological_Process_2023	Cholesterol Transport (GO:0030301)	0.119988	0.207436	8.12245	17.2226	TSPO2
GO_Biological_Process_2023	Rho Protein Signal Transduction (GO:0007266)	0.122193	0.210063	7.96279	16.739	ARHGAP4
GO_Molecular_Function_2023	Glutathione Transferase Activity (GO:0004364)	0.0677318	0.212506	15.059	40.5417	CLIC2
GO_Molecular_Function_2023	Monocarboxylic Acid Transmembrane Transporter Activity (GO:0008028)	0.0770333	0.212506	13.1132	33.616	TSPO2
GO_Molecular_Function_2023	Inorganic Anion Transmembrane Transporter Activity (GO:0015103)	0.0770333	0.212506	13.1132	33.616	SLC4A1
GO_Molecular_Function_2023	Actin Binding (GO:0003779)	0.0766734	0.212506	4.55087	11.6876	FHDC1;MYO1F
GO_Molecular_Function_2023	Aminopeptidase Activity (GO:0004177)	0.0700658	0.212506	14.5204	38.5999	ANPEP
GO_Biological_Process_2023	Monoatomic Anion Transmembrane Transport (GO:0098656)	0.126588	0.216402	7.66153	15.835	SLC4A1
GO_Biological_Process_2023	Peptide Metabolic Process (GO:0006518)	0.130962	0.221405	7.38219	15.0069	ANPEP
GO_Biological_Process_2023	Cellular Response To Peptide (GO:1901653)	0.130962	0.221405	7.38219	15.0069	VIM
GO_Biological_Process_2023	RNA Catabolic Process (GO:0006401)	0.133141	0.221418	7.25	14.6185	RNASE2
GO_Biological_Process_2023	Chemokine-Mediated Signaling Pathway (GO:0070098)	0.133141	0.221418	7.25	14.6185	PF4
GO_Biological_Process_2023	Regulation Of Calcium Ion Transport (GO:0051924)	0.133141	0.221418	7.25	14.6185	HOMER3
GO_Biological_Process_2023	Regulation Of Phagocytosis (GO:0050764)	0.135314	0.223816	7.12245	14.246	CYBA
GO_Biological_Process_2023	Cellular Response To Chemokine (GO:1990869)	0.137482	0.22618	6.9993	13.8884	PF4
GO_Biological_Process_2023	Positive Regulation Of Phagocytosis (GO:0050766)	0.139645	0.228509	6.88032	13.545	CYBA
GO_Biological_Process_2023	Fatty Acid Catabolic Process (GO:0009062)	0.141802	0.229584	6.76531	13.2148	LPIN2
GO_Biological_Process_2023	Positive Regulation Of Organelle Assembly (GO:1902117)	0.141802	0.229584	6.76531	13.2148	CAPG
GO_Cellular_Component_2023	Proton-Transporting V-type ATPase Complex (GO:0033176)	0.0512328	0.230548	20.3367	60.4281	TCIRG1
GO_Cellular_Component_2023	Actin Cytoskeleton (GO:0015629)	0.0483091	0.230548	3.86643	11.7158	CAPG;FHDC1;MYO1F
GO_Biological_Process_2023	Protein Polymerization (GO:0051258)	0.146101	0.234067	6.54641	12.5918	FHDC1
GO_Biological_Process_2023	Inorganic Anion Transmembrane Transport (GO:0098661)	0.146101	0.234067	6.54641	12.5918	SLC4A1
GO_Biological_Process_2023	Antimicrobial Humoral Immune Response Mediated By Antimicrobial Peptide (GO:0061844)	0.150378	0.239666	6.3412	12.014	PF4
GO_Molecular_Function_2023	Translation Initiation Factor Activity (GO:0003743)	0.0976302	0.244412	10.1582	23.6337	EIF1AY
GO_Molecular_Function_2023	Copper Ion Binding (GO:0005507)	0.106639	0.244412	9.23284	20.6659	SOD3
GO_Molecular_Function_2023	Chemokine Activity (GO:0008009)	0.108878	0.244412	9.02721	20.0181	PF4
GO_Molecular_Function_2023	Pyrophosphatase Activity (GO:0016462)	0.11556	0.244412	8.46173	18.2601	PHOSPHO1
GO_Molecular_Function_2023	Phosphoric Ester Hydrolase Activity (GO:0042578)	0.122193	0.244412	7.96279	16.739	PHOSPHO1
GO_Molecular_Function_2023	Exopeptidase Activity (GO:0008238)	0.122193	0.244412	7.96279	16.739	ANPEP
GO_Molecular_Function_2023	Antiporter Activity (GO:0015297)	0.124393	0.244412	7.80926	16.2769	SLC4A1
GO_Molecular_Function_2023	Monoatomic Anion Channel Activity (GO:0005253)	0.124393	0.244412	7.80926	16.2769	CLIC2
GO_Molecular_Function_2023	Amino Acid Transmembrane Transporter Activity (GO:0015171)	0.130962	0.244412	7.38219	15.0069	TSPO2
GO_Molecular_Function_2023	Metalloexopeptidase Activity (GO:0008235)	0.133141	0.244412	7.25	14.6185	ANPEP
GO_Molecular_Function_2023	Nuclease Activity (GO:0004518)	0.135314	0.244412	7.12245	14.246	RNASE2
GO_Molecular_Function_2023	Chemokine Receptor Binding (GO:0042379)	0.117777	0.244412	8.28863	17.7291	PF4
GO_Molecular_Function_2023	Cholesterol Binding (GO:0015485)	0.117777	0.244412	8.28863	17.7291	TSPO2
GO_Molecular_Function_2023	Sterol Binding (GO:0032934)	0.137482	0.244412	6.9993	13.8884	TSPO2
GO_Molecular_Function_2023	SH3 Domain Binding (GO:0017124)	0.137482	0.244412	6.9993	13.8884	CYBA
GO_Molecular_Function_2023	Purine Ribonucleoside Triphosphate Binding (GO:0035639)	0.115999	0.244412	2.62836	5.66193	ARL4A;EPB42;MYO1F
GO_Cellular_Component_2023	Intracellular Organelle Lumen (GO:0070013)	0.0617335	0.246934	2.49367	6.94469	ALAS2;LGALS1;HBB;HBA1;SOD3
GO_Cellular_Component_2023	Vacuolar Proton-Transporting V-type ATPase Complex (GO:0016471)	0.0583386	0.246934	17.6815	50.2417	TCIRG1
GO_Biological_Process_2023	Intermediate Filament Organization (GO:0045109)	0.156756	0.248535	6.05635	11.2228	VIM
GO_Biological_Process_2023	Negative Regulation Of Extrinsic Apoptotic Signaling Pathway (GO:2001237)	0.160981	0.252616	5.88021	10.74	PF4
GO_Biological_Process_2023	Neutrophil Chemotaxis (GO:0030593)	0.160981	0.252616	5.88021	10.74	PF4
GO_Cellular_Component_2023	Cytoplasmic Vesicle Membrane (GO:0030659)	0.0732625	0.253295	3.23514	8.45572	ANPEP;STAB1;TCIRG1
GO_Cellular_Component_2023	Intracellular Non-Membrane-Bounded Organelle (GO:0043232)	0.0761773	0.253295	2.15166	5.53985	SELENBP1;ARL4A;EPB42;CAPG;VIM;ANK1
GO_Cellular_Component_2023	Basolateral Plasma Membrane (GO:0016323)	0.0681811	0.253295	4.87697	13.0975	SLC4A1;ANK1
GO_Cellular_Component_2023	Ficolin-1-Rich Granule (GO:0101002)	0.0773958	0.253295	4.52564	11.5803	HBB;TCIRG1
GO_Biological_Process_2023	Synapse Assembly (GO:0007416)	0.163086	0.253321	5.79592	10.5108	PLXND1
GO_Biological_Process_2023	Regulation Of Hydrolase Activity (GO:0051336)	0.163086	0.253321	5.79592	10.5108	PLXND1
GO_Molecular_Function_2023	Chloride Channel Activity (GO:0005254)	0.148242	0.255963	6.44218	12.2975	CLIC2
GO_Molecular_Function_2023	Double-Stranded RNA Binding (GO:0003725)	0.150378	0.255963	6.3412	12.014	VIM
GO_Molecular_Function_2023	ATP Binding (GO:0005524)	0.154049	0.256748	2.95924	5.5352	EPB42;MYO1F
GO_Biological_Process_2023	Granulocyte Chemotaxis (GO:0071621)	0.16728	0.257225	5.63435	10.0747	PF4
GO_Biological_Process_2023	Monocarboxylic Acid Transport (GO:0015718)	0.16728	0.257225	5.63435	10.0747	TSPO2
GO_Biological_Process_2023	Regulation Of mRNA Stability (GO:0043488)	0.16937	0.259136	5.55689	9.86721	VIM
GO_Biological_Process_2023	Positive Regulation Of Neurogenesis (GO:0050769)	0.171454	0.259727	5.48152	9.66634	PLXND1
GO_Biological_Process_2023	Defense Response To Gram-negative Bacterium (GO:0050829)	0.171454	0.259727	5.48152	9.66634	RNASE2
GO_Biological_Process_2023	Positive Regulation Of Interleukin-6 Production (GO:0032755)	0.173533	0.261582	5.40816	9.47179	CYBA
GO_Biological_Process_2023	Actomyosin Structure Organization (GO:0031032)	0.175607	0.262126	5.33673	9.28328	FHDC1
GO_Biological_Process_2023	Neutrophil Migration (GO:1990266)	0.175607	0.262126	5.33673	9.28328	PF4
GO_Molecular_Function_2023	RNA Nuclease Activity (GO:0004540)	0.160981	0.262826	5.88021	10.74	RNASE2
GO_Biological_Process_2023	Cellular Response To UV (GO:0034644)	0.17974	0.26316	5.19937	8.92339	MMP2
GO_Biological_Process_2023	Response To Insulin (GO:0032868)	0.17974	0.26316	5.19937	8.92339	LPIN2
GO_Biological_Process_2023	Positive Regulation Of Endocytosis (GO:0045807)	0.17974	0.26316	5.19937	8.92339	CYBA
GO_Biological_Process_2023	Organonitrogen Compound Catabolic Process (GO:1901565)	0.177676	0.26316	5.26716	9.10056	ANPEP
GO_Molecular_Function_2023	Phosphatidylinositol-4,5-Bisphosphate Binding (GO:0005546)	0.16728	0.267648	5.63435	10.0747	CAPG
GO_Biological_Process_2023	Supramolecular Fiber Organization (GO:0097435)	0.186903	0.272345	2.60563	4.37006	VIM;MYO1F
GO_Biological_Process_2023	Macromolecule Catabolic Process (GO:0009057)	0.192017	0.273289	4.82653	7.9646	RNASE2
GO_Biological_Process_2023	Positive Regulation Of Amide Metabolic Process (GO:0034250)	0.192017	0.273289	4.82653	7.9646	VIM
GO_Biological_Process_2023	Defense Response To Gram-positive Bacterium (GO:0050830)	0.192017	0.273289	4.82653	7.9646	RNASE2
GO_Biological_Process_2023	Integrin-Mediated Signaling Pathway (GO:0007229)	0.192017	0.273289	4.82653	7.9646	PRAM1
GO_Biological_Process_2023	Regulation Of Osteoblast Differentiation (GO:0045667)	0.192017	0.273289	4.82653	7.9646	HEMGN
GO_Biological_Process_2023	Exocytosis (GO:0006887)	0.194046	0.274898	4.76951	7.82038	ANK1
GO_Biological_Process_2023	Intracellular Protein Transport (GO:0006886)	0.195049	0.275045	2.53186	4.13835	ARL4A;HOMER3
GO_Biological_Process_2023	Protein-Containing Complex Assembly (GO:0065003)	0.197774	0.27761	2.50818	4.06483	CYBA;CAPG
GO_Biological_Process_2023	Organic Anion Transport (GO:0015711)	0.200101	0.278323	4.60622	7.41108	SLC4A1
GO_Biological_Process_2023	Cellular Response To Peptide Hormone Stimulus (GO:0071375)	0.200101	0.278323	4.60622	7.41108	LPIN2
GO_Biological_Process_2023	Positive Regulation Of Binding (GO:0051099)	0.204114	0.282619	4.5034	7.15626	CLIC2
GO_Molecular_Function_2023	Adenyl Ribonucleotide Binding (GO:0032559)	0.180605	0.283302	2.66599	4.56269	EPB42;MYO1F
GO_Biological_Process_2023	Cell Junction Assembly (GO:0034329)	0.21208	0.291015	4.3109	6.68532	PLXND1
GO_Biological_Process_2023	T Cell Receptor Signaling Pathway (GO:0050852)	0.21208	0.291015	4.3109	6.68532	PRAM1
GO_Molecular_Function_2023	Growth Factor Activity (GO:0008083)	0.192017	0.295411	4.82653	7.9646	CLEC11A
GO_Biological_Process_2023	Negative Regulation Of Macromolecule Biosynthetic Process (GO:0010558)	0.218003	0.296483	4.17694	6.36252	PF4
GO_Biological_Process_2023	Positive Regulation Of Protein-Containing Complex Assembly (GO:0031334)	0.218003	0.296483	4.17694	6.36252	CAPG
GO_Biological_Process_2023	Cellular Response To Insulin Stimulus (GO:0032869)	0.219967	0.297832	4.13411	6.26019	LPIN2
GO_Biological_Process_2023	Antimicrobial Humoral Response (GO:0019730)	0.221927	0.299161	4.09215	6.16035	PF4
GO_Biological_Process_2023	Protein Catabolic Process (GO:0030163)	0.225832	0.30309	4.01071	5.96779	TCIRG1
GO_Biological_Process_2023	Macroautophagy (GO:0016236)	0.229718	0.305625	3.93244	5.78423	TCIRG1
GO_Biological_Process_2023	Positive Regulation Of Inflammatory Response (GO:0050729)	0.229718	0.305625	3.93244	5.78423	LGALS1
GO_Molecular_Function_2023	Endopeptidase Activity (GO:0004175)	0.204154	0.308156	2.45458	3.90004	MMP2;TPSAB1
GO_Molecular_Function_2023	Phosphatidylinositol Bisphosphate Binding (GO:1902936)	0.208106	0.308306	4.40506	6.91464	CAPG
GO_Biological_Process_2023	Monoatomic Ion Transport (GO:0006811)	0.235511	0.311975	3.82056	5.52453	SLC4A1
GO_Biological_Process_2023	Positive Regulation Of Translation (GO:0045727)	0.237432	0.313165	3.78467	5.44187	VIM
GO_Biological_Process_2023	Adenylate Cyclase-Activating G Protein-Coupled Receptor Signaling Pathway (GO:0007189)	0.241261	0.316849	3.71485	5.28205	PF4
GO_Biological_Process_2023	RNA Metabolic Process (GO:0016070)	0.243169	0.31799	3.68089	5.20478	RNASE2
GO_Biological_Process_2023	Regulation Of Interleukin-6 Production (GO:0032675)	0.248862	0.324051	3.58263	4.98291	CYBA
GO_Molecular_Function_2023	Metalloendopeptidase Activity (GO:0004222)	0.223882	0.325646	4.05102	6.06291	MMP2
GO_Cellular_Component_2023	Polymeric Cytoskeletal Fiber (GO:0099513)	0.14195	0.330371	3.11898	6.08912	VIM;FHDC1
GO_Cellular_Component_2023	Lytic Vacuole Membrane (GO:0098852)	0.161053	0.330371	2.875	5.24981	ANPEP;TCIRG1
GO_Cellular_Component_2023	Lysosome (GO:0005764)	0.130842	0.330371	2.48298	5.04979	ANPEP;TCIRG1;MPO
GO_Cellular_Component_2023	Neuron Projection (GO:0043005)	0.162397	0.330371	2.23473	4.0621	HOMER3;VIM;ANK1
GO_Cellular_Component_2023	Tertiary Granule Lumen (GO:1904724)	0.124393	0.330371	7.80926	16.2769	HBB
GO_Cellular_Component_2023	Extracellular Membrane-Bounded Organelle (GO:0065010)	0.133141	0.330371	7.25	14.6185	PHOSPHO1
GO_Cellular_Component_2023	Microvillus (GO:0005902)	0.135314	0.330371	7.12245	14.246	MYO1F
GO_Cellular_Component_2023	Ficolin-1-Rich Granule Membrane (GO:0101003)	0.139645	0.330371	6.88032	13.545	TCIRG1
GO_Cellular_Component_2023	Cortical Cytoskeleton (GO:0030863)	0.146101	0.330371	6.54641	12.5918	SLC4A1
GO_Cellular_Component_2023	Platelet Alpha Granule Lumen (GO:0031093)	0.152509	0.330371	6.24333	11.7408	PF4
GO_Cellular_Component_2023	Intermediate Filament (GO:0005882)	0.158871	0.330371	5.96699	10.9772	VIM
GO_Cellular_Component_2023	Actin Filament (GO:0005884)	0.163086	0.330371	5.79592	10.5108	FHDC1
GO_Cellular_Component_2023	Tertiary Granule Membrane (GO:0070821)	0.165186	0.330371	5.714	10.2891	CYBA
GO_Cellular_Component_2023	Vacuolar Membrane (GO:0005774)	0.137482	0.330371	6.9993	13.8884	TCIRG1
GO_Biological_Process_2023	Regulation Of Small GTPase Mediated Signal Transduction (GO:0051056)	0.256389	0.331034	3.45945	4.70851	ARHGAP4
GO_Biological_Process_2023	Positive Regulation Of Cell Projection Organization (GO:0031346)	0.256389	0.331034	3.45945	4.70851	PLXND1
GO_Biological_Process_2023	Fatty Acid Metabolic Process (GO:0006631)	0.263842	0.335959	3.34441	4.45611	LPIN2
GO_Biological_Process_2023	Positive Regulation Of Macromolecule Biosynthetic Process (GO:0010557)	0.263842	0.335959	3.34441	4.45611	VIM
GO_Biological_Process_2023	Receptor-Mediated Endocytosis (GO:0006898)	0.263842	0.335959	3.34441	4.45611	STAB1
GO_Biological_Process_2023	Organonitrogen Compound Biosynthetic Process (GO:1901566)	0.265693	0.335959	3.31683	4.39617	ALAS2
GO_Biological_Process_2023	Regulation Of Cell Motility (GO:2000145)	0.265693	0.335959	3.31683	4.39617	PLXND1
GO_Biological_Process_2023	Cellular Response To Oxygen-Containing Compound (GO:1901701)	0.2698	0.339748	2.01588	2.64096	VIM;PF4
GO_Biological_Process_2023	Protein-Containing Complex Organization (GO:0043933)	0.271221	0.340138	3.23673	4.22336	CAPG
GO_Biological_Process_2023	Regulation Of Anatomical Structure Morphogenesis (GO:0022603)	0.273054	0.341039	3.21088	4.168	PLXND1
GO_Biological_Process_2023	Vesicle-Mediated Transport (GO:0016192)	0.274452	0.341391	1.99073	2.57397	ARL4A;ANK1
GO_Biological_Process_2023	Protein Targeting (GO:0006605)	0.276708	0.342804	3.1604	4.06045	HOMER3
GO_Biological_Process_2023	Golgi Organization (GO:0007030)	0.278528	0.343667	3.13574	4.00822	FHDC1
GO_Biological_Process_2023	Synapse Organization (GO:0050808)	0.280343	0.344518	3.11146	3.95697	PLXND1
GO_Biological_Process_2023	Negative Regulation Of Cell Motility (GO:2000146)	0.283961	0.347568	3.06401	3.85734	ARHGAP4
GO_Biological_Process_2023	Antigen Receptor-Mediated Signaling Pathway (GO:0050851)	0.285763	0.34838	3.04082	3.8089	PRAM1
GO_Molecular_Function_2023	Phosphatase Binding (GO:0019902)	0.245071	0.350102	3.64755	5.1292	ANK1
GO_Molecular_Function_2023	Protein Phosphatase Binding (GO:0019903)	0.250751	0.351931	3.55102	4.91211	ANK1
GO_Cellular_Component_2023	Intermediate Filament Cytoskeleton (GO:0045111)	0.183852	0.357767	5.06888	8.58476	VIM
GO_Biological_Process_2023	Nervous System Development (GO:0007399)	0.294905	0.357806	1.88699	2.30421	PLXND1;CAPG
GO_Biological_Process_2023	Regulation Of Cell Migration (GO:0030334)	0.295833	0.357806	1.88252	2.29284	PLXND1;ARHGAP4
GO_Cellular_Component_2023	Actin-Based Cell Projection (GO:0098858)	0.189983	0.359968	4.88493	8.11298	MYO1F
GO_Biological_Process_2023	Regulation Of Cell Population Proliferation (GO:0042127)	0.299799	0.361175	1.60511	1.93359	CLEC11A;TCIRG1;PF4
GO_Cellular_Component_2023	Platelet Alpha Granule (GO:0031091)	0.200101	0.363798	4.60622	7.41108	PF4
GO_Cellular_Component_2023	Specific Granule Membrane (GO:0035579)	0.20211	0.363798	4.55423	7.28196	CYBA
GO_Biological_Process_2023	Ras Protein Signal Transduction (GO:0007265)	0.303541	0.364249	2.82674	3.37015	ARHGAP4
GO_Biological_Process_2023	Axon Guidance (GO:0007411)	0.312267	0.373256	2.73056	3.17809	PLXND1
GO_Cellular_Component_2023	Golgi Lumen (GO:0005796)	0.221927	0.383018	4.09215	6.16035	SOD3
GO_Cellular_Component_2023	Lysosomal Membrane (GO:0005765)	0.223427	0.383018	2.3065	3.45668	ANPEP;TCIRG1
GO_Biological_Process_2023	Adenylate Cyclase-Modulating G Protein-Coupled Receptor Signaling Pathway (GO:0007188)	0.336133	0.398669	2.49282	2.71779	PF4
GO_Biological_Process_2023	Negative Regulation Of Cell Migration (GO:0030336)	0.336133	0.398669	2.49282	2.71779	ARHGAP4
GO_Biological_Process_2023	Positive Regulation Of Gene Expression (GO:0010628)	0.338321	0.399715	1.69735	1.83952	VIM;PF4
GO_Biological_Process_2023	Positive Regulation Of Cell Population Proliferation (GO:0008284)	0.341071	0.401414	1.6865	1.81411	CLEC11A;TCIRG1
GO_Molecular_Function_2023	G Protein-Coupled Receptor Binding (GO:0001664)	0.296482	0.408941	2.90868	3.53627	HOMER3
GO_Biological_Process_2023	Positive Regulation Of I-kappaB kinase/NF-kappaB Signaling (GO:0043123)	0.355942	0.417311	2.31949	2.39601	LGALS1
GO_Biological_Process_2023	Negative Regulation Of Cytokine Production (GO:0001818)	0.360803	0.421396	2.27983	2.32412	HOMER3
GO_Molecular_Function_2023	Transition Metal Ion Binding (GO:0046914)	0.316218	0.428771	1.78928	2.06004	ANPEP;SOD3
GO_Biological_Process_2023	Macromolecule Biosynthetic Process (GO:0009059)	0.368825	0.429127	2.21664	2.21095	ALAS2
GO_Cellular_Component_2023	Ficolin-1-Rich Granule Lumen (GO:1904813)	0.265693	0.437793	3.31683	4.39617	HBB
GO_Cellular_Component_2023	Cytoplasmic Side Of Plasma Membrane (GO:0009898)	0.26754	0.437793	3.2897	4.33741	ANK1
GO_Biological_Process_2023	Endocytosis (GO:0006897)	0.378321	0.438508	2.14525	2.08521	STAB1
GO_Biological_Process_2023	Intracellular Monoatomic Cation Homeostasis (GO:0030003)	0.37989	0.438665	2.13379	2.06524	ALAS2
GO_Biological_Process_2023	Regulation Of Cell Differentiation (GO:0045595)	0.384574	0.442404	2.10013	2.00692	HEMGN
GO_Cellular_Component_2023	Peroxisome (GO:0005777)	0.276708	0.442733	3.1604	4.06045	VIM
GO_Biological_Process_2023	Regulation Of Programmed Cell Death (GO:0043067)	0.387677	0.443558	2.07827	1.96933	LGALS1
GO_Biological_Process_2023	Positive Regulation Of Protein Metabolic Process (GO:0051247)	0.389223	0.443558	2.0675	1.9509	VIM
GO_Biological_Process_2023	Negative Regulation Of Cellular Process (GO:0048523)	0.389925	0.443558	1.51207	1.42407	PLXND1;TGFBI
GO_Cellular_Component_2023	Asymmetric Synapse (GO:0032279)	0.283961	0.444461	3.06401	3.85734	HOMER3
GO_Biological_Process_2023	Regulation Of Translation (GO:0006417)	0.398418	0.45154	2.00518	1.84527	VIM
GO_Cellular_Component_2023	Mitotic Spindle (GO:0072686)	0.301783	0.454647	2.8468	3.41059	CAPG
GO_Cellular_Component_2023	Postsynaptic Density (GO:0014069)	0.315727	0.454647	2.69388	3.10571	HOMER3
GO_Cellular_Component_2023	Nucleolus (GO:0005730)	0.303244	0.454647	1.59425	1.90228	SELENBP1;ARL4A;CAPG
GO_Cellular_Component_2023	Nuclear Lumen (GO:0031981)	0.309453	0.454647	1.57504	1.84745	SELENBP1;ARL4A;CAPG
GO_Biological_Process_2023	Protein Stabilization (GO:0050821)	0.407478	0.460104	1.94647	1.74748	AHSP
GO_Cellular_Component_2023	Specific Granule (GO:0042581)	0.329398	0.465032	2.55645	2.8389	CYBA
GO_Cellular_Component_2023	Bounding Membrane Of Organelle (GO:0098588)	0.336412	0.465802	1.49671	1.63055	ANPEP;STAB1;TCIRG1
GO_Biological_Process_2023	Regulation Of GTPase Activity (GO:0043087)	0.416403	0.468454	1.89106	1.65676	PLXND1
GO_Molecular_Function_2023	Cytokine Activity (GO:0005125)	0.360803	0.48107	2.27983	2.32412	PF4
GO_Biological_Process_2023	Cilium Organization (GO:0044782)	0.436721	0.489511	1.77317	1.469	FHDC1
GO_Biological_Process_2023	Regulation Of I-kappaB kinase/NF-kappaB Signaling (GO:0043122)	0.442398	0.494064	1.74212	1.42078	LGALS1
GO_Molecular_Function_2023	Protein Heterodimerization Activity (GO:0046982)	0.37989	0.498216	2.13379	2.06524	CYBA
GO_Biological_Process_2023	Regulation Of Inflammatory Response (GO:0050727)	0.453583	0.504714	1.68312	1.33063	LGALS1
GO_Cellular_Component_2023	Microtubule (GO:0005874)	0.372006	0.505366	2.19232	2.16787	FHDC1
GO_Biological_Process_2023	Cilium Assembly (GO:0060271)	0.457721	0.507473	1.662	1.29885	FHDC1
GO_Biological_Process_2023	Positive Regulation Of Programmed Cell Death (GO:0043068)	0.460462	0.508669	1.64821	1.27823	LGALS1
GO_Molecular_Function_2023	GTP Binding (GO:0005525)	0.396895	0.512123	2.01531	1.86231	ARL4A
GO_Molecular_Function_2023	GTPase Activator Activity (GO:0005096)	0.411957	0.52312	1.91837	1.70128	ARHGAP4
GO_Biological_Process_2023	Cytokine-Mediated Signaling Pathway (GO:0019221)	0.476627	0.524633	1.56999	1.1634	PF4
GO_Biological_Process_2023	Cellular Component Assembly (GO:0022607)	0.480594	0.527103	1.55157	1.13689	CAPG
GO_Molecular_Function_2023	Transcription Regulatory Region Nucleic Acid Binding (GO:0001067)	0.430988	0.533983	1.80534	1.51951	KLF1
GO_Molecular_Function_2023	Guanyl Ribonucleotide Binding (GO:0032561)	0.433862	0.533983	1.78912	1.49396	ARL4A
GO_Cellular_Component_2023	Axon (GO:0030424)	0.402965	0.537286	1.97539	1.79544	VIM
GO_Cellular_Component_2023	Spindle (GO:0005819)	0.410468	0.537339	1.92764	1.71649	CAPG
GO_Biological_Process_2023	Positive Regulation Of Apoptotic Process (GO:0043065)	0.493604	0.539438	1.49313	1.05419	LGALS1
GO_Biological_Process_2023	Chemical Synaptic Transmission (GO:0007268)	0.497444	0.541701	1.47644	1.03096	TSPOAP1
GO_Biological_Process_2023	Plasma Membrane Bounded Cell Projection Assembly (GO:0120031)	0.499989	0.542541	1.46551	1.01585	FHDC1
GO_Biological_Process_2023	Monoatomic Cation Transmembrane Transport (GO:0098655)	0.507546	0.545131	1.43367	0.972271	TCIRG1
GO_Biological_Process_2023	Central Nervous System Development (GO:0007417)	0.51004	0.545131	1.42336	0.958299	CAPG
GO_Biological_Process_2023	Positive Regulation Of Cell Differentiation (GO:0045597)	0.51004	0.545131	1.42336	0.958299	PF4
GO_Biological_Process_2023	Transmembrane Receptor Protein Tyrosine Kinase Signaling Pathway (GO:0007169)	0.511283	0.545131	1.41826	0.951414	MMP2
GO_Biological_Process_2023	Inorganic Cation Transmembrane Transport (GO:0098662)	0.511283	0.545131	1.41826	0.951414	TCIRG1
GO_Molecular_Function_2023	Microtubule Binding (GO:0008017)	0.452197	0.548118	1.69028	1.34147	FHDC1
GO_Cellular_Component_2023	Lytic Vacuole (GO:0000323)	0.429546	0.552273	1.81357	1.53252	MPO
GO_Biological_Process_2023	Regulation Of Intracellular Signal Transduction (GO:1902531)	0.527157	0.560104	1.35507	0.867596	ARHGAP4
GO_Biological_Process_2023	Regulation Of Apoptotic Process (GO:0042981)	0.530332	0.561528	1.14077	0.723533	LGALS1;MPO
GO_Cellular_Component_2023	Vesicle (GO:0031982)	0.446618	0.564149	1.71952	1.38602	MYO1F
GO_Cellular_Component_2023	trans-Golgi Network (GO:0005802)	0.454966	0.564785	1.67602	1.31992	TGFBI
GO_Biological_Process_2023	Cellular Response To Cytokine Stimulus (GO:0071345)	0.540193	0.569997	1.30579	0.804143	PF4
GO_Biological_Process_2023	Protein Transport (GO:0015031)	0.546002	0.574146	1.28454	0.777316	ARL4A
GO_Biological_Process_2023	Positive Regulation Of Cytokine Production (GO:0001819)	0.554013	0.580575	1.2559	0.741695	CYBA
GO_Biological_Process_2023	Organelle Assembly (GO:0070925)	0.556276	0.580957	1.24795	0.73191	FHDC1
GO_Cellular_Component_2023	Cilium (GO:0005929)	0.476627	0.581647	1.56999	1.1634	FHDC1
GO_Cellular_Component_2023	Dendrite (GO:0030425)	0.493604	0.592325	1.49313	1.05419	HOMER3
GO_Cellular_Component_2023	Endoplasmic Reticulum Lumen (GO:0005788)	0.511283	0.603481	1.41826	0.951414	LGALS1
GO_Biological_Process_2023	Protein Localization (GO:0008104)	0.587857	0.611851	1.14286	0.607167	ARL4A
GO_Biological_Process_2023	Positive Regulation Of Macromolecule Metabolic Process (GO:0010604)	0.601289	0.62371	1.1012	0.560157	PF4
GO_Biological_Process_2023	Positive Regulation Of DNA-templated Transcription (GO:0045893)	0.608431	0.628986	0.963109	0.478541	LPIN2;PF4;KLF1
GO_Biological_Process_2023	Negative Regulation Of Programmed Cell Death (GO:0043069)	0.618208	0.636941	1.05102	0.505468	MPO
GO_Molecular_Function_2023	Receptor Ligand Activity (GO:0048018)	0.552877	0.644958	1.25992	0.746651	CLEC11A
GO_Molecular_Function_2023	Cadherin Binding (GO:0045296)	0.552877	0.644958	1.25992	0.746651	CAPG
GO_Molecular_Function_2023	Tubulin Binding (GO:0015631)	0.556276	0.644958	1.24795	0.73191	FHDC1
GO_Molecular_Function_2023	Zinc Ion Binding (GO:0008270)	0.577224	0.659685	1.17707	0.646829	ANPEP
GO_Cellular_Component_2023	Microtubule Cytoskeleton (GO:0015630)	0.5783	0.662006	1.17356	0.642715	FHDC1
GO_Cellular_Component_2023	Mitochondrial Matrix (GO:0005759)	0.592037	0.662006	1.12971	0.592181	ALAS2
GO_Cellular_Component_2023	Endosome Membrane (GO:0010008)	0.598228	0.662006	1.11054	0.570579	TCIRG1
GO_Cellular_Component_2023	Mitochondrial Inner Membrane (GO:0005743)	0.607343	0.662006	1.08296	0.540031	ALAS2
GO_Cellular_Component_2023	Endoplasmic Reticulum Membrane (GO:0005789)	0.60054	0.662006	0.998696	0.509261	CYBA;LPIN2
GO_Cellular_Component_2023	Focal Adhesion (GO:0005925)	0.62401	0.662006	1.03437	0.487796	VIM
GO_Cellular_Component_2023	Cell-Substrate Junction (GO:0030055)	0.631611	0.662006	1.01295	0.465432	VIM
GO_Cellular_Component_2023	Organelle Inner Membrane (GO:0019866)	0.634423	0.662006	1.00514	0.457379	ALAS2
GO_Biological_Process_2023	Regulation Of Nucleic Acid-Templated Transcription (GO:1903506)	0.681579	0.699876	0.882348	0.338242	KLF1
GO_Biological_Process_2023	Positive Regulation Of Transcription By RNA Polymerase II (GO:0045944)	0.687007	0.703091	0.846421	0.317755	LPIN2;PF4
GO_Biological_Process_2023	Negative Regulation Of Apoptotic Process (GO:0043066)	0.705144	0.719247	0.826043	0.28858	MPO
GO_Molecular_Function_2023	GTPase Regulator Activity (GO:0030695)	0.657924	0.741323	0.942105	0.394426	ARHGAP4
GO_Biological_Process_2023	Positive Regulation Of Intracellular Signal Transduction (GO:1902533)	0.735968	0.748193	0.756582	0.231945	LGALS1
GO_Molecular_Function_2023	Kinase Binding (GO:0019900)	0.688038	0.755711	0.866613	0.324037	PRAM1
GO_Molecular_Function_2023	RNA Binding (GO:0003723)	0.694753	0.755711	0.840577	0.306137	LGALS1;IFIT1B;VIM
GO_Molecular_Function_2023	Transcription Cis-Regulatory Region Binding (GO:0000976)	0.699033	0.755711	0.840359	0.300897	KLF1
GO_Biological_Process_2023	Positive Regulation Of Nucleic Acid-Templated Transcription (GO:1903508)	0.756834	0.766858	0.711863	0.198333	KLF1
GO_Cellular_Component_2023	Mitochondrial Membrane (GO:0031966)	0.745959	0.767272	0.734959	0.215405	ALAS2
GO_Molecular_Function_2023	Protein Kinase Binding (GO:0019901)	0.726296	0.774716	0.777911	0.248774	PRAM1
GO_Biological_Process_2023	Regulation Of Gene Expression (GO:0010468)	0.781065	0.788799	0.697222	0.172281	PF4;KLF1
GO_Biological_Process_2023	Protein Modification Process (GO:0036211)	0.836692	0.842197	0.553032	0.0986051	EPB42
GO_Molecular_Function_2023	Protein Homodimerization Activity (GO:0042803)	0.814575	0.857447	0.595542	0.122139	SLC4A1
GO_Molecular_Function_2023	Sequence-Specific Double-Stranded DNA Binding (GO:1990837)	0.838379	0.871043	0.54982	0.096925	KLF1
GO_Biological_Process_2023	Regulation Of Transcription By RNA Polymerase II (GO:0006357)	0.894254	0.897186	0.565012	0.0631487	LPIN2;PF4;KLF1
GO_Molecular_Function_2023	Cis-Regulatory Region Sequence-Specific DNA Binding (GO:0000987)	0.940796	0.956399	0.350734	0.021405	KLF1
GO_Molecular_Function_2023	RNA Polymerase II Cis-Regulatory Region Sequence-Specific DNA Binding (GO:0000978)	0.944444	0.956399	0.342788	0.0195933	KLF1
GO_Molecular_Function_2023	RNA Polymerase II Transcription Regulatory Region Sequence-Specific DNA Binding (GO:0000977)	0.957755	0.957755	0.312225	0.0134767	KLF1
GO_Biological_Process_2023	Regulation Of DNA-templated Transcription (GO:0006355)	0.993642	0.993642	0.191535	0.00122174	KLF1
GO_Cellular_Component_2023	Nucleus (GO:0005634)	0.980352	0.994159	0.470745	0.00934148	ARL4A;CAPG;CLIC2;LPIN2;MPO;KLF1
GO_Cellular_Component_2023	Intracellular Membrane-Bounded Organelle (GO:0043231)	0.995186	0.995186	0.389938	0.00188166	ARL4A;CAPG;CLIC2;LPIN2;MPO;KLF1

## Sheet: Mock_d0_v_PGK(iEPOR)_d14
Gene_set	Term	P-value	Adjusted P-value	Odds Ratio	Combined Score	Genes
GO_Biological_Process_2023	Hydrogen Peroxide Catabolic Process (GO:0042744)	6.75131e-12	3.09885e-09	194.182	4994.61	HBM;HBG2;HBG1;HBE1;HBB;HBA1		P<0.01
GO_Biological_Process_2023	Oxygen Transport (GO:0015671)	1.98394e-11	4.55314e-09	443.222	10922.5	HBG2;HBG1;HBE1;HBB;HBA1		P<0.05
GO_Biological_Process_2023	Carbon Dioxide Transport (GO:0015670)	3.63045e-11	5.55459e-09	369.333	8878.43	HBG2;HBG1;HBE1;HBB;HBA1
GO_Biological_Process_2023	Gas Transport (GO:0015669)	2.34224e-10	2.52315e-08	221.556	4912.94	HBG2;HBG1;HBE1;HBB;HBA1
GO_Biological_Process_2023	One-Carbon Compound Transport (GO:0019755)	2.74853e-10	2.52315e-08	93.6724	2062.18	HBG2;HBG1;HBE1;HBB;SLC4A1;HBA1
GO_Molecular_Function_2023	Heme Binding (GO:0020037)	7.75197e-08	6.35661e-06	33.4495	547.66	HBM;HBG2;HBG1;HBE1;HBB;HBA1
GO_Biological_Process_2023	Positive Regulation Of Cell Death (GO:0010942)	1.54768e-07	1.18398e-05	49.1481	770.709	HBG2;HBG1;HBE1;HBB;HBA1
GO_Biological_Process_2023	Regulation Of Cell Death (GO:0010941)	3.59581e-07	2.35782e-05	40.9383	607.455	HBG2;HBG1;HBE1;HBB;HBA1
GO_Cellular_Component_2023	Collagen-Containing Extracellular Matrix (GO:0062023)	3.67839e-06	0.00020599	10.2205	127.889	COL3A1;LGALS1;MMP2;TIMP2;IGFBP7;TPSAB1;SOD3;PF4
GO_Biological_Process_2023	Positive Regulation Of Cellular Process (GO:0048522)	1.42923e-05	0.000820021	7.26642	81.0626	HBG2;HBG1;CCL5;HBE1;CLEC11A;S100A13;HBB;HBA1;AIF1
GO_Biological_Process_2023	Extracellular Matrix Disassembly (GO:0022617)	0.000181142	0.00920549	30.9948	267.058	MMP2;CAPG;TPSAB1
GO_Biological_Process_2023	Positive Regulation Of Smooth Muscle Cell Proliferation (GO:0048661)	0.000220611	0.00920549	28.8772	243.12	CCL5;MMP2;AIF1
GO_Biological_Process_2023	Cellular Component Disassembly (GO:0022411)	0.000206893	0.00920549	29.5502	250.684	MMP2;CAPG;TPSAB1
GO_Biological_Process_2023	Erythrocyte Differentiation (GO:0030218)	0.000249786	0.00936582	27.6189	229.096	ALAS2;AHSP;KLF1
GO_Biological_Process_2023	Intracellular Iron Ion Homeostasis (GO:0006879)	0.000265263	0.00936582	27.0299	222.585	ALAS2;TFRC;ERFE
GO_Biological_Process_2023	Actin Polymerization Or Depolymerization (GO:0008154)	0.000315376	0.0103398	25.4043	204.803	CAPG;FHDC1;AIF1
GO_Biological_Process_2023	Myeloid Cell Differentiation (GO:0030099)	0.000391159	0.0119695	23.5177	184.529	ALAS2;AHSP;KLF1
GO_Cellular_Component_2023	Endocytic Vesicle (GO:0030139)	0.00144844	0.0162226	8.94837	58.4979	STAB1;HBB;LPAR2;HBA1
GO_Cellular_Component_2023	Endocytic Vesicle Lumen (GO:0071682)	0.00124779	0.0162226	43.7083	292.25	HBB;HBA1
GO_Cellular_Component_2023	Intracellular Organelle Lumen (GO:0070013)	0.00118554	0.0162226	4.29066	28.9085	COL3A1;ALAS2;LGALS1;TIMP2;HBB;IGFBP7;HBA1;SOD3
GO_Cellular_Component_2023	Actin Filament (GO:0005884)	0.000745521	0.0162226	18.6627	134.398	TMOD1;FHDC1;AIF1
GO_Biological_Process_2023	Positive Regulation Of T Cell Proliferation (GO:0042102)	0.000575786	0.0165179	20.4749	152.738	TFRC;CCL5;AIF1
GO_Biological_Process_2023	Positive Regulation Of Lymphocyte Migration (GO:2000403)	0.000718739	0.0183279	59.3333	429.455	CCL5;AIF1
GO_Biological_Process_2023	Positive Regulation Of Smooth Muscle Cell Migration (GO:0014911)	0.000718739	0.0183279	59.3333	429.455	CCL5;AIF1
GO_Biological_Process_2023	Extracellular Matrix Organization (GO:0030198)	0.000973382	0.0223391	9.99899	69.3403	COL3A1;MMP2;CAPG;TPSAB1
GO_Biological_Process_2023	Negative Regulation Of Blood Vessel Morphogenesis (GO:2000181)	0.000944168	0.0223391	17.1443	119.414	YJEFN3;STAB1;PF4
GO_Biological_Process_2023	Intracellular Monoatomic Cation Homeostasis (GO:0030003)	0.00129191	0.027128	9.23983	61.46	ALAS2;TFRC;CCL5;ERFE
GO_Biological_Process_2023	Negative Regulation Of Angiogenesis (GO:0016525)	0.00130025	0.027128	15.2784	101.528	YJEFN3;STAB1;PF4
GO_Biological_Process_2023	Regulation Of T Cell Migration (GO:2000404)	0.0014985	0.0299049	39.5417	257.151	CCL5;AIF1
GO_Biological_Process_2023	Regulation Of Angiogenesis (GO:0045765)	0.00170742	0.0325196	8.5438	54.4477	PLXND1;YJEFN3;STAB1;PF4
GO_Biological_Process_2023	Positive Regulation Of T Cell Migration (GO:2000406)	0.00177122	0.0325196	36.0996	228.73	CCL5;AIF1
GO_Biological_Process_2023	Peptide Cross-Linking (GO:0018149)	0.00206573	0.0364681	33.2083	205.303	COL3A1;EPB42
GO_Biological_Process_2023	Positive Regulation Of T Cell Activation (GO:0050870)	0.00243076	0.0413229	12.1804	73.3208	TFRC;CCL5;AIF1
GO_Biological_Process_2023	Positive Regulation Of Mononuclear Cell Migration (GO:0071677)	0.00271926	0.0445764	28.6221	169.082	CCL5;AIF1
GO_Cellular_Component_2023	Tertiary Granule Lumen (GO:1904724)	0.00778121	0.0558023	16.2574	78.9464	TIMP2;HBB
GO_Cellular_Component_2023	Extracellular Membrane-Bounded Organelle (GO:0065010)	0.00895516	0.0558023	15.072	71.0723	PHOSPHO1;TFRC
GO_Cellular_Component_2023	Basolateral Plasma Membrane (GO:0016323)	0.00896823	0.0558023	7.51596	35.4307	TFRC;SLC4A1;ANK1
GO_Cellular_Component_2023	Actin Cytoskeleton (GO:0015629)	0.00894865	0.0558023	5.28389	24.9201	TMOD1;CAPG;FHDC1;AIF1
GO_Biological_Process_2023	Response To Hydrogen Peroxide (GO:0042542)	0.00590974	0.093537	18.8504	96.7242	HBB;HBA1
GO_Cellular_Component_2023	HFE-transferrin Receptor Complex (GO:1990712)	0.0173717	0.0972818	67.8367	274.936	TFRC
GO_Biological_Process_2023	Positive Regulation Of Response To External Stimulus (GO:0032103)	0.00685512	0.104883	8.31383	41.4258	LGALS1;CCL5;AIF1
GO_Biological_Process_2023	Positive Regulation Of Leukocyte Chemotaxis (GO:0002690)	0.00806767	0.119454	15.9439	76.8479	CCL5;AIF1
GO_Biological_Process_2023	Chemokine-Mediated Signaling Pathway (GO:0070098)	0.00895516	0.124558	15.072	71.0723	CCL5;PF4
GO_Biological_Process_2023	Regulation Of Calcium Ion Transport (GO:0051924)	0.00895516	0.124558	15.072	71.0723	CCL5;HOMER3
GO_Biological_Process_2023	Cellular Response To Chemokine (GO:1990869)	0.00957001	0.125504	14.5417	67.606	CCL5;PF4
GO_Biological_Process_2023	Positive Regulation Of I-kappaB kinase/NF-kappaB Signaling (GO:0043123)	0.00954963	0.125504	7.33968	34.1387	LGALS1;TFRC;S100A13
GO_Molecular_Function_2023	Copper Ion Binding (GO:0005507)	0.00566179	0.125901	19.2897	99.8053	S100A13;SOD3
GO_Molecular_Function_2023	Chemokine Activity (GO:0008009)	0.00590974	0.125901	18.8504	96.7242	CCL5;PF4
GO_Molecular_Function_2023	Low-Density Lipoprotein Particle Binding (GO:0030169)	0.0392729	0.125901	27.1224	87.8013	STAB1
GO_Molecular_Function_2023	CXCR Chemokine Receptor Binding (GO:0045236)	0.0392729	0.125901	27.1224	87.8013	PF4
GO_Molecular_Function_2023	Chemokine Receptor Binding (GO:0042379)	0.0069503	0.125901	17.276	85.8441	CCL5;PF4
GO_Molecular_Function_2023	Phosphatidylinositol 3-Kinase Regulator Activity (GO:0035014)	0.0416767	0.125901	25.426	80.7992	CISH
GO_Molecular_Function_2023	Glutamate Receptor Binding (GO:0035254)	0.0440745	0.125901	23.9292	74.7039	HOMER3
GO_Molecular_Function_2023	Ankyrin Binding (GO:0030506)	0.0440745	0.125901	23.9292	74.7039	SLC4A1
GO_Molecular_Function_2023	1-Acylglycerol-3-Phosphate O-acyltransferase Activity (GO:0003841)	0.0464665	0.125901	22.5986	69.3558	AGPAT2
GO_Molecular_Function_2023	Lysophosphatidic Acid Acyltransferase Activity (GO:0042171)	0.0488525	0.125901	21.4082	64.6301	AGPAT2
GO_Molecular_Function_2023	Phosphatidylinositol Phospholipase C Activity (GO:0004435)	0.0488525	0.125901	21.4082	64.6301	CCL5
GO_Molecular_Function_2023	Fibroblast Growth Factor Binding (GO:0017134)	0.0488525	0.125901	21.4082	64.6301	S100A13
GO_Molecular_Function_2023	Hydrolase Activity, Acting On Acid Anhydrides, In Phosphorus-Containing Anhydrides (GO:0016818)	0.0124388	0.125901	101.765	446.438	PHOSPHO1
GO_Molecular_Function_2023	Phosphatase Activity (GO:0016791)	0.0183241	0.125901	10.2207	40.878	PHOSPHO1;LPIN2
GO_Molecular_Function_2023	Oxidoreductase Activity, Acting On A Sulfur Group Of Donors, Oxygen As Acceptor (GO:0016670)	0.0149083	0.125901	81.4082	342.39	SELENBP1
GO_Molecular_Function_2023	G Protein-Coupled Glutamate Receptor Binding (GO:0035256)	0.0173717	0.125901	67.8367	274.936	HOMER3
GO_Molecular_Function_2023	RAGE Receptor Binding (GO:0050786)	0.0198292	0.125901	58.1429	227.955	S100A13
GO_Molecular_Function_2023	Protease Binding (GO:0002020)	0.0390617	0.125901	6.71646	21.7789	COL3A1;TIMP2
GO_Molecular_Function_2023	Serine-Type Endopeptidase Activity (GO:0004252)	0.0390617	0.125901	6.71646	21.7789	MMP2;TPSAB1
GO_Molecular_Function_2023	G Protein-Coupled Receptor Binding (GO:0001664)	0.0479027	0.125901	5.98188	18.1765	CCL5;HOMER3
GO_Molecular_Function_2023	Serine-Type Peptidase Activity (GO:0008236)	0.0491322	0.125901	5.89583	17.7656	MMP2;TPSAB1
GO_Molecular_Function_2023	Semaphorin Receptor Activity (GO:0017154)	0.0247259	0.125901	45.2177	167.301	PLXND1
GO_Molecular_Function_2023	Phospholipase Activator Activity (GO:0016004)	0.0247259	0.125901	45.2177	167.301	CCL5
GO_Molecular_Function_2023	Platelet-Derived Growth Factor Binding (GO:0048407)	0.0247259	0.125901	45.2177	167.301	COL3A1
GO_Molecular_Function_2023	Lipase Activator Activity (GO:0060229)	0.0295988	0.125901	36.9926	130.215	CCL5
GO_Molecular_Function_2023	Receptor Ligand Activity (GO:0048018)	0.0454584	0.125901	3.96593	12.2585	CCL5;CLEC11A;ERFE
GO_Molecular_Function_2023	Protein Homodimerization Activity (GO:0042803)	0.0243407	0.125901	3.26281	12.1233	TFRC;SMIM1;CCL5;S100A13;SLC4A1
GO_Molecular_Function_2023	Phosphatidate Phosphatase Activity (GO:0008195)	0.0320262	0.125901	33.9082	116.685	LPIN2
GO_Molecular_Function_2023	Metalloendopeptidase Inhibitor Activity (GO:0008191)	0.0320262	0.125901	33.9082	116.685	TIMP2
GO_Molecular_Function_2023	1-Phosphatidylinositol-3-Kinase Regulator Activity (GO:0046935)	0.0344477	0.125901	31.2983	105.422	CISH
GO_Molecular_Function_2023	Solute:Inorganic Anion Antiporter Activity (GO:0005452)	0.0344477	0.125901	31.2983	105.422	SLC4A1
GO_Molecular_Function_2023	Bicarbonate Transmembrane Transporter Activity (GO:0015106)	0.0536072	0.131143	19.3673	56.6702	SLC4A1
GO_Molecular_Function_2023	Lipoprotein Particle Binding (GO:0071813)	0.0559758	0.131143	18.4861	53.2924	STAB1
GO_Molecular_Function_2023	Phospholipase C Activity (GO:0004629)	0.0559758	0.131143	18.4861	53.2924	CCL5
GO_Molecular_Function_2023	Monoatomic Anion Transmembrane Transporter Activity (GO:0008509)	0.0583386	0.132882	17.6815	50.2417	SLC4A1
GO_Biological_Process_2023	Regulation Of Cell Population Proliferation (GO:0042127)	0.0117274	0.143317	3.44318	15.3078	TFRC;CLEC11A;S100A13;IGFBP7;AIF1;PF4
GO_Biological_Process_2023	Cellular Response To Type II Interferon (GO:0071346)	0.0118651	0.143317	12.9466	57.4073	CCL5;AIF1
GO_Biological_Process_2023	Response To Reactive Oxygen Species (GO:0000302)	0.0118651	0.143317	12.9466	57.4073	HBB;HBA1
GO_Cellular_Component_2023	Polymeric Cytoskeletal Fiber (GO:0099513)	0.0285412	0.145301	4.79649	17.0583	TMOD1;FHDC1;AIF1
GO_Biological_Process_2023	Negative Regulation Of Neuron Migration (GO:2001223)	0.0124388	0.146395	101.765	446.438	COL3A1
GO_Biological_Process_2023	Neutrophil Chemotaxis (GO:0030593)	0.0132742	0.14766	12.1826	52.6524	CCL5;PF4
GO_Biological_Process_2023	Granulocyte Chemotaxis (GO:0071621)	0.0143765	0.14766	11.6661	49.4894	CCL5;PF4
GO_Biological_Process_2023	Positive Regulation Of Lymphocyte Proliferation (GO:0050671)	0.0147525	0.14766	11.5035	48.5026	TFRC;CCL5
GO_Biological_Process_2023	Actomyosin Structure Organization (GO:0031032)	0.0159058	0.14766	11.0417	45.7243	TMOD1;FHDC1
GO_Biological_Process_2023	Neutrophil Migration (GO:1990266)	0.0159058	0.14766	11.0417	45.7243	CCL5;PF4
GO_Biological_Process_2023	Regulation Of T Cell Proliferation (GO:0042129)	0.0159058	0.14766	11.0417	45.7243	TFRC;CCL5
GO_Biological_Process_2023	Response To Type II Interferon (GO:0034341)	0.0170965	0.14766	10.6154	43.1927	CCL5;AIF1
GO_Biological_Process_2023	Negative Regulation Of Membrane Protein Ectodomain Proteolysis (GO:0051045)	0.0149083	0.14766	81.4082	342.39	TIMP2
GO_Biological_Process_2023	Regulation Of Metallopeptidase Activity (GO:1905048)	0.0149083	0.14766	81.4082	342.39	TIMP2
GO_Biological_Process_2023	Regulation Of Natural Killer Cell Chemotaxis (GO:2000501)	0.0149083	0.14766	81.4082	342.39	CCL5
GO_Biological_Process_2023	Positive Regulation Of Activation Of Janus Kinase Activity (GO:0010536)	0.0149083	0.14766	81.4082	342.39	CCL5
GO_Biological_Process_2023	Positive Regulation Of Leukocyte Differentiation (GO:1902107)	0.0173717	0.14766	67.8367	274.936	LGALS1
GO_Biological_Process_2023	Negative Regulation Of Mitochondrial Fusion (GO:0010637)	0.0173717	0.14766	67.8367	274.936	TFRC
GO_Biological_Process_2023	Negative Regulation Of T Cell Apoptotic Process (GO:0070233)	0.0173717	0.14766	67.8367	274.936	CCL5
GO_Biological_Process_2023	Regulation Of Activation Of Janus Kinase Activity (GO:0010533)	0.0173717	0.14766	67.8367	274.936	CCL5
GO_Biological_Process_2023	Integrin-Mediated Signaling Pathway (GO:0007229)	0.0191628	0.149165	9.97339	39.4426	COL3A1;PRAM1
GO_Biological_Process_2023	Exocytosis (GO:0006887)	0.0195881	0.149165	9.85417	38.7548	CCL5;ANK1
GO_Biological_Process_2023	Positive Regulation Of Protein-Containing Complex Assembly (GO:0031334)	0.0249949	0.149165	8.61719	31.7895	TFRC;CAPG
GO_Biological_Process_2023	Extracellular Structure Organization (GO:0043062)	0.0304217	0.149165	7.72702	26.9874	COL3A1;MMP2
GO_Biological_Process_2023	External Encapsulating Structure Organization (GO:0045229)	0.0309363	0.149165	7.65509	26.6078	COL3A1;MMP2
GO_Biological_Process_2023	Semaphorin-Plexin Signaling Pathway Involved In Axon Guidance (GO:1902287)	0.0198292	0.149165	58.1429	227.955	PLXND1
GO_Biological_Process_2023	Regulation Of I-kappaB kinase/NF-kappaB Signaling (GO:0043122)	0.0202417	0.149165	5.49689	21.4379	LGALS1;TFRC;S100A13
GO_Biological_Process_2023	Inflammatory Response (GO:0006954)	0.0211646	0.149165	5.40142	20.8248	CCL5;AIF1;PF4
GO_Biological_Process_2023	Negative Regulation Of Lymphocyte Apoptotic Process (GO:0070229)	0.0222806	0.149165	50.8724	193.521	CCL5
GO_Biological_Process_2023	Transferrin Transport (GO:0033572)	0.0222806	0.149165	50.8724	193.521	TFRC
GO_Biological_Process_2023	Regulation Of Store-Operated Calcium Entry (GO:2001256)	0.0222806	0.149165	50.8724	193.521	HOMER3
GO_Biological_Process_2023	Positive Regulation Of T Cell Apoptotic Process (GO:0070234)	0.0222806	0.149165	50.8724	193.521	CCL5
GO_Biological_Process_2023	Regulation Of Cell-Cell Adhesion Mediated By Integrin (GO:0033632)	0.0222806	0.149165	50.8724	193.521	CCL5
GO_Biological_Process_2023	Regulation Of Dendritic Cell Differentiation (GO:2001198)	0.0247259	0.149165	45.2177	167.301	LGALS1
GO_Biological_Process_2023	Positive Regulation Of Macrophage Differentiation (GO:0045651)	0.0247259	0.149165	45.2177	167.301	PF4
GO_Biological_Process_2023	Hematopoietic Stem Cell Proliferation (GO:0071425)	0.0247259	0.149165	45.2177	167.301	YJEFN3
GO_Biological_Process_2023	Mast Cell Activation Involved In Immune Response (GO:0002279)	0.0247259	0.149165	45.2177	167.301	S100A13
GO_Biological_Process_2023	Mast Cell Degranulation (GO:0043303)	0.0247259	0.149165	45.2177	167.301	S100A13
GO_Biological_Process_2023	Cellular Response To UV-A (GO:0071492)	0.0247259	0.149165	45.2177	167.301	MMP2
GO_Biological_Process_2023	Removal Of Superoxide Radicals (GO:0019430)	0.0247259	0.149165	45.2177	167.301	SOD3
GO_Biological_Process_2023	Erythrocyte Development (GO:0048821)	0.0271653	0.149165	40.6939	146.735	ALAS2
GO_Biological_Process_2023	Regulation Of Homotypic Cell-Cell Adhesion (GO:0034110)	0.0271653	0.149165	40.6939	146.735	CCL5
GO_Biological_Process_2023	Regulation Of Mitochondrial Fusion (GO:0010635)	0.0271653	0.149165	40.6939	146.735	TFRC
GO_Biological_Process_2023	Macrophage Chemotaxis (GO:0048246)	0.0271653	0.149165	40.6939	146.735	CCL5
GO_Biological_Process_2023	Mast Cell Mediated Immunity (GO:0002448)	0.0271653	0.149165	40.6939	146.735	S100A13
GO_Biological_Process_2023	Cellular Response To Superoxide (GO:0071451)	0.0271653	0.149165	40.6939	146.735	SOD3
GO_Biological_Process_2023	Negative Regulation Of calcineurin-NFAT Signaling Cascade (GO:0070885)	0.0271653	0.149165	40.6939	146.735	HOMER3
GO_Biological_Process_2023	Negative Regulation Of Calcineurin-Mediated Signaling (GO:0106057)	0.0271653	0.149165	40.6939	146.735	HOMER3
GO_Biological_Process_2023	Positive Regulation Of Insulin Receptor Signaling Pathway (GO:0046628)	0.0295988	0.149165	36.9926	130.215	ERFE
GO_Biological_Process_2023	G Protein-Coupled Glutamate Receptor Signaling Pathway (GO:0007216)	0.0295988	0.149165	36.9926	130.215	HOMER3
GO_Biological_Process_2023	Granulocyte Activation (GO:0036230)	0.0295988	0.149165	36.9926	130.215	CCL5
GO_Biological_Process_2023	Positive Regulation Of Viral Entry Into Host Cell (GO:0046598)	0.0295988	0.149165	36.9926	130.215	LGALS1
GO_Biological_Process_2023	Macrophage Migration (GO:1905517)	0.0295988	0.149165	36.9926	130.215	CCL5
GO_Biological_Process_2023	Positive Regulation By Symbiont Of Entry Into Host (GO:0075294)	0.0295988	0.149165	36.9926	130.215	LGALS1
GO_Biological_Process_2023	Positive Regulation Of T Cell Chemotaxis (GO:0010820)	0.0295988	0.149165	36.9926	130.215	CCL5
GO_Biological_Process_2023	Negative Regulation By Host Of Viral Transcription (GO:0043922)	0.0295988	0.149165	36.9926	130.215	CCL5
GO_Biological_Process_2023	Semaphorin-Plexin Signaling Pathway Involved In Neuron Projection Guidance (GO:1902285)	0.0295988	0.149165	36.9926	130.215	PLXND1
GO_Biological_Process_2023	Positive Regulation Of Gene Expression (GO:0010628)	0.0316856	0.149165	3.55754	12.2803	TFRC;S100A13;AGPAT2;PF4
GO_Biological_Process_2023	Positive Regulation Of Cell Population Proliferation (GO:0008284)	0.0323127	0.149165	3.53472	12.1322	CCL5;CLEC11A;S100A13;AIF1
GO_Biological_Process_2023	Positive Regulation Of Macrophage Chemotaxis (GO:0010759)	0.0320262	0.149165	33.9082	116.685	CCL5
GO_Biological_Process_2023	Killing By Host Of Symbiont Cells (GO:0051873)	0.0320262	0.149165	33.9082	116.685	PF4
GO_Biological_Process_2023	Response To UV-A (GO:0070141)	0.0320262	0.149165	33.9082	116.685	MMP2
GO_Biological_Process_2023	Regulation Of T Cell Chemotaxis (GO:0010819)	0.0320262	0.149165	33.9082	116.685	CCL5
GO_Biological_Process_2023	Positive Regulation Of Cellular Response To Insulin Stimulus (GO:1900078)	0.0320262	0.149165	33.9082	116.685	ERFE
GO_Biological_Process_2023	Stress Fiber Assembly (GO:0043149)	0.0344477	0.149165	31.2983	105.422	FHDC1
GO_Biological_Process_2023	Striated Muscle Cell Development (GO:0055002)	0.0344477	0.149165	31.2983	105.422	TMOD1
GO_Biological_Process_2023	Negative Regulation Of Smooth Muscle Cell Migration (GO:0014912)	0.0344477	0.149165	31.2983	105.422	AIF1
GO_Biological_Process_2023	Regulation Of Macrophage Differentiation (GO:0045649)	0.0344477	0.149165	31.2983	105.422	PF4
GO_Biological_Process_2023	Positive Regulation Of Response To Cytokine Stimulus (GO:0060760)	0.0344477	0.149165	31.2983	105.422	AGPAT2
GO_Biological_Process_2023	Membrane Raft Organization (GO:0031579)	0.0344477	0.149165	31.2983	105.422	YJEFN3
GO_Biological_Process_2023	Regulation Of MHC Class II Biosynthetic Process (GO:0045346)	0.0344477	0.149165	31.2983	105.422	PF4
GO_Biological_Process_2023	Contractile Actin Filament Bundle Assembly (GO:0030038)	0.0344477	0.149165	31.2983	105.422	FHDC1
GO_Molecular_Function_2023	Receptor Antagonist Activity (GO:0048019)	0.072394	0.149845	14.019	36.8087	CCL5
GO_Molecular_Function_2023	Cytokine Activity (GO:0005125)	0.0730949	0.149845	4.68134	12.2464	CCL5;PF4
GO_Molecular_Function_2023	Acylglycerol O-acyltransferase Activity (GO:0016411)	0.0700658	0.149845	14.5204	38.5999	AGPAT2
GO_Molecular_Function_2023	Protein Tyrosine Kinase Activator Activity (GO:0030296)	0.0700658	0.149845	14.5204	38.5999	CCL5
GO_Molecular_Function_2023	Inorganic Anion Transmembrane Transporter Activity (GO:0015103)	0.0770333	0.150398	13.1132	33.616	SLC4A1
GO_Molecular_Function_2023	Actin Binding (GO:0003779)	0.0766734	0.150398	4.55087	11.6876	TMOD1;FHDC1
GO_Biological_Process_2023	Positive Regulation Of Immunoglobulin Mediated Immune Response (GO:0002891)	0.0368633	0.151074	29.0612	95.9177	TFRC
GO_Biological_Process_2023	Negative Regulation Of Gluconeogenesis (GO:0045721)	0.0368633	0.151074	29.0612	95.9177	ERFE
GO_Biological_Process_2023	Positive Regulation Of Isotype Switching (GO:0045830)	0.0368633	0.151074	29.0612	95.9177	TFRC
GO_Biological_Process_2023	Regulation Of Isotype Switching (GO:0045191)	0.0368633	0.151074	29.0612	95.9177	TFRC
GO_Biological_Process_2023	Defense Response To Protozoan (GO:0042832)	0.0368633	0.151074	29.0612	95.9177	PF4
GO_Biological_Process_2023	Dendritic Cell Chemotaxis (GO:0002407)	0.0368633	0.151074	29.0612	95.9177	CCL5
GO_Biological_Process_2023	Receptor-Mediated Endocytosis (GO:0006898)	0.0373774	0.151825	6.88542	22.6302	TFRC;STAB1
GO_Biological_Process_2023	Positive Regulation Of Homotypic Cell-Cell Adhesion (GO:0034112)	0.0392729	0.152376	27.1224	87.8013	CCL5
GO_Biological_Process_2023	Positive Regulation Of Lymphocyte Chemotaxis (GO:0140131)	0.0416767	0.152376	25.426	80.7992	CCL5
GO_Biological_Process_2023	Positive Regulation Of Macrophage Derived Foam Cell Differentiation (GO:0010744)	0.0416767	0.152376	25.426	80.7992	PF4
GO_Biological_Process_2023	Triglyceride Biosynthetic Process (GO:0019432)	0.0416767	0.152376	25.426	80.7992	LPIN2
GO_Biological_Process_2023	Rac Protein Signal Transduction (GO:0016601)	0.0416767	0.152376	25.426	80.7992	AIF1
GO_Biological_Process_2023	Positive Regulation Of Cell Adhesion Mediated By Integrin (GO:0033630)	0.0416767	0.152376	25.426	80.7992	CCL5
GO_Biological_Process_2023	Positive Regulation Of Macrophage Migration (GO:1905523)	0.0440745	0.152376	23.9292	74.7039	CCL5
GO_Biological_Process_2023	Positive Regulation Of Monocyte Chemotaxis (GO:0090026)	0.0440745	0.152376	23.9292	74.7039	CCL5
GO_Biological_Process_2023	Actin Filament Capping (GO:0051693)	0.0440745	0.152376	23.9292	74.7039	CAPG
GO_Biological_Process_2023	Neutrophil Activation (GO:0042119)	0.0440745	0.152376	23.9292	74.7039	CCL5
GO_Biological_Process_2023	Barbed-End Actin Filament Capping (GO:0051016)	0.0440745	0.152376	23.9292	74.7039	CAPG
GO_Biological_Process_2023	Renal Absorption (GO:0070293)	0.0440745	0.152376	23.9292	74.7039	HBB
GO_Biological_Process_2023	Dendritic Cell Migration (GO:0036336)	0.0440745	0.152376	23.9292	74.7039	CCL5
GO_Biological_Process_2023	Regulation Of Granulocyte Chemotaxis (GO:0071622)	0.0464665	0.152376	22.5986	69.3558	CCL5
GO_Biological_Process_2023	Heme Biosynthetic Process (GO:0006783)	0.0464665	0.152376	22.5986	69.3558	ALAS2
GO_Biological_Process_2023	Regulation Of Megakaryocyte Differentiation (GO:0045652)	0.0464665	0.152376	22.5986	69.3558	PF4
GO_Biological_Process_2023	Bicarbonate Transport (GO:0015701)	0.0464665	0.152376	22.5986	69.3558	SLC4A1
GO_Biological_Process_2023	Regulation Of Smooth Muscle Cell Migration (GO:0014910)	0.0464665	0.152376	22.5986	69.3558	CCL5
GO_Biological_Process_2023	Positive Regulation Of Phospholipase Activity (GO:0010518)	0.0488525	0.152376	21.4082	64.6301	CCL5
GO_Biological_Process_2023	Regulation Of Macrophage Chemotaxis (GO:0010758)	0.0488525	0.152376	21.4082	64.6301	CCL5
GO_Biological_Process_2023	Intracellular Monoatomic Ion Homeostasis (GO:0006873)	0.0488525	0.152376	21.4082	64.6301	SLC4A1
GO_Biological_Process_2023	Positive Regulation Of Vascular Associated Smooth Muscle Cell Proliferation (GO:1904707)	0.0488525	0.152376	21.4082	64.6301	MMP2
GO_Biological_Process_2023	Lipopolysaccharide-Mediated Signaling Pathway (GO:0031663)	0.0488525	0.152376	21.4082	64.6301	CCL5
GO_Biological_Process_2023	Cell Projection Organization (GO:0030030)	0.0488525	0.152376	21.4082	64.6301	CAPG
GO_Biological_Process_2023	Microglial Cell Activation (GO:0001774)	0.0488525	0.152376	21.4082	64.6301	AIF1
GO_Biological_Process_2023	Monocarboxylic Acid Catabolic Process (GO:0072329)	0.0488525	0.152376	21.4082	64.6301	LPIN2
GO_Biological_Process_2023	Response To Fibroblast Growth Factor (GO:0071774)	0.0488525	0.152376	21.4082	64.6301	CCL5
GO_Biological_Process_2023	Cellular Response To Lipopolysaccharide (GO:0071222)	0.0384971	0.152376	6.77186	22.0571	CCL5;PF4
GO_Biological_Process_2023	Positive Regulation Of Defense Response (GO:0031349)	0.0384971	0.152376	6.77186	22.0571	LGALS1;CCL5
GO_Biological_Process_2023	Response To Cytokine (GO:0034097)	0.0390617	0.152376	6.71646	21.7789	COL3A1;TIMP2
GO_Biological_Process_2023	Protein Localization To Plasma Membrane (GO:0072659)	0.0460803	0.152376	6.11574	18.8204	ANK1;PRAM1
GO_Biological_Process_2023	Protein Localization To Cell Periphery (GO:1990778)	0.0491322	0.152376	5.89583	17.7656	ANK1;PRAM1
GO_Biological_Process_2023	Cellular Response To Cytokine Stimulus (GO:0071345)	0.0416816	0.152376	4.11127	13.0643	CCL5;AIF1;PF4
GO_Biological_Process_2023	Positive Regulation Of Cytokine Production (GO:0001819)	0.0458099	0.152376	3.95322	12.1888	S100A13;AGPAT2;AIF1
GO_Biological_Process_2023	Positive Regulation Of Intracellular Signal Transduction (GO:1902533)	0.0418641	0.152376	3.24276	10.2903	LGALS1;TFRC;CCL5;S100A13
GO_Biological_Process_2023	Negative Regulation Of Interleukin-2 Production (GO:0032703)	0.0512328	0.1527	20.3367	60.4281	HOMER3
GO_Biological_Process_2023	Regulation Of Membrane Protein Ectodomain Proteolysis (GO:0051043)	0.0512328	0.1527	20.3367	60.4281	TIMP2
GO_Biological_Process_2023	Positive Regulation Of Translational Initiation (GO:0045948)	0.0512328	0.1527	20.3367	60.4281	CCL5
GO_Biological_Process_2023	Porphyrin-Containing Compound Biosynthetic Process (GO:0006779)	0.0512328	0.1527	20.3367	60.4281	ALAS2
GO_Biological_Process_2023	Actin Filament Organization (GO:0007015)	0.0503732	0.1527	5.81221	17.3686	CAPG;AIF1
GO_Biological_Process_2023	Regulation Of Cell Adhesion (GO:0030155)	0.0503732	0.1527	5.81221	17.3686	PLXND1;CCL5
GO_Biological_Process_2023	Negative Regulation Of Extrinsic Apoptotic Signaling Pathway In Absence Of Ligand (GO:2001240)	0.0536072	0.15283	19.3673	56.6702	PF4
GO_Biological_Process_2023	Negative Regulation Of Myeloid Cell Differentiation (GO:0045638)	0.0536072	0.15283	19.3673	56.6702	PF4
GO_Biological_Process_2023	Acylglycerol Biosynthetic Process (GO:0046463)	0.0536072	0.15283	19.3673	56.6702	LPIN2
GO_Biological_Process_2023	Negative Regulation Of Signal Transduction In Absence Of Ligand (GO:1901099)	0.0536072	0.15283	19.3673	56.6702	PF4
GO_Biological_Process_2023	Regulation Of Mononuclear Cell Migration (GO:0071675)	0.0536072	0.15283	19.3673	56.6702	CCL5
GO_Biological_Process_2023	Positive Regulation Of Viral Life Cycle (GO:1903902)	0.0536072	0.15283	19.3673	56.6702	LGALS1
GO_Biological_Process_2023	Negative Regulation Of G Protein-Coupled Receptor Signaling Pathway (GO:0045744)	0.0536072	0.15283	19.3673	56.6702	CCL5
GO_Biological_Process_2023	Regulation Of Cholesterol Transport (GO:0032374)	0.0559758	0.157	18.4861	53.2924	YJEFN3
GO_Biological_Process_2023	Cellular Lipid Catabolic Process (GO:0044242)	0.0559758	0.157	18.4861	53.2924	LPIN2
GO_Biological_Process_2023	Regulation Of Cellular Component Organization (GO:0051128)	0.056096	0.157	5.4633	15.7381	CISH;TFRC
GO_Cellular_Component_2023	Endoplasmic Reticulum Lumen (GO:0005788)	0.0340256	0.158786	4.46786	15.1042	COL3A1;LGALS1;IGFBP7
GO_Biological_Process_2023	Iron Ion Transport (GO:0006826)	0.0583386	0.159389	17.6815	50.2417	TFRC
GO_Biological_Process_2023	Protein Kinase B Signaling (GO:0043491)	0.0583386	0.159389	17.6815	50.2417	CCL5
GO_Biological_Process_2023	Eosinophil Chemotaxis (GO:0048245)	0.0583386	0.159389	17.6815	50.2417	CCL5
GO_Biological_Process_2023	Eosinophil Migration (GO:0072677)	0.0583386	0.159389	17.6815	50.2417	CCL5
GO_Molecular_Function_2023	Chemoattractant Activity (GO:0042056)	0.0839496	0.16009	11.9544	29.6174	CCL5
GO_Cellular_Component_2023	Ficolin-1-Rich Granule Lumen (GO:1904813)	0.0379356	0.163415	6.82817	22.3408	TIMP2;HBB
GO_Biological_Process_2023	Positive Regulation Of Glucose Import (GO:0046326)	0.0606955	0.163878	16.9439	47.4748	ERFE
GO_Biological_Process_2023	Regulation Of Monocyte Chemotaxis (GO:0090025)	0.0606955	0.163878	16.9439	47.4748	CCL5
GO_Molecular_Function_2023	Peptidase Inhibitor Activity (GO:0030414)	0.0885322	0.164992	11.2891	27.3692	TIMP2
GO_Biological_Process_2023	Cellular Response To Xenobiotic Stimulus (GO:0071466)	0.0630467	0.168247	16.2653	44.9553	TFRC
GO_Biological_Process_2023	Nitrogen Compound Transport (GO:0071705)	0.0627089	0.168247	5.12138	14.1824	HBB;HBA1
GO_Biological_Process_2023	Regulation Of Extrinsic Apoptotic Signaling Pathway In Absence Of Ligand (GO:2001239)	0.0653922	0.169662	15.6389	42.6529	PF4
GO_Biological_Process_2023	Positive Regulation Of Nitric Oxide Biosynthetic Process (GO:0045429)	0.0653922	0.169662	15.6389	42.6529	HBB
GO_Biological_Process_2023	Activation Of Phospholipase C Activity (GO:0007202)	0.0653922	0.169662	15.6389	42.6529	LPAR2
GO_Biological_Process_2023	Myeloid Cell Development (GO:0061515)	0.0653922	0.169662	15.6389	42.6529	ALAS2
GO_Biological_Process_2023	Regulation Of Cytokine Production (GO:0001817)	0.0654254	0.169662	4.99621	13.6239	S100A13;AGPAT2
GO_Biological_Process_2023	Regulation Of Chemotaxis (GO:0050920)	0.0677318	0.173206	15.059	40.5417	AIF1
GO_Biological_Process_2023	Positive Regulation Of Nitric Oxide Metabolic Process (GO:1904407)	0.0677318	0.173206	15.059	40.5417	HBB
GO_Biological_Process_2023	Positive Regulation Of Phosphate Metabolic Process (GO:0045937)	0.072394	0.173206	14.019	36.8087	CCL5
GO_Biological_Process_2023	Regulation Of Macrophage Derived Foam Cell Differentiation (GO:0010743)	0.072394	0.173206	14.019	36.8087	PF4
GO_Biological_Process_2023	Phagocytosis, Engulfment (GO:0006911)	0.072394	0.173206	14.019	36.8087	AIF1
GO_Biological_Process_2023	Regulation Of Vasculature Development (GO:1901342)	0.072394	0.173206	14.019	36.8087	PLXND1
GO_Biological_Process_2023	Negative Regulation Of Carbohydrate Metabolic Process (GO:0045912)	0.072394	0.173206	14.019	36.8087	ERFE
GO_Biological_Process_2023	Positive Regulation Of Glucose Transmembrane Transport (GO:0010828)	0.0747165	0.173206	13.551	35.1521	ERFE
GO_Biological_Process_2023	Positive Regulation Of Leukocyte Migration (GO:0002687)	0.0747165	0.173206	13.551	35.1521	AIF1
GO_Biological_Process_2023	Regulation Of Gluconeogenesis (GO:0006111)	0.0747165	0.173206	13.551	35.1521	ERFE
GO_Biological_Process_2023	Actin Filament Polymerization (GO:0030041)	0.0747165	0.173206	13.551	35.1521	FHDC1
GO_Biological_Process_2023	Leukocyte Cell-Cell Adhesion (GO:0007159)	0.0747165	0.173206	13.551	35.1521	CCL5
GO_Biological_Process_2023	Positive Regulation Of G1/S Transition Of Mitotic Cell Cycle (GO:1900087)	0.0747165	0.173206	13.551	35.1521	AIF1
GO_Biological_Process_2023	Positive Regulation Of Rho Protein Signal Transduction (GO:0035025)	0.0747165	0.173206	13.551	35.1521	COL3A1
GO_Biological_Process_2023	Endodermal Cell Differentiation (GO:0035987)	0.0747165	0.173206	13.551	35.1521	MMP2
GO_Biological_Process_2023	Positive Regulation Of Cellular Biosynthetic Process (GO:0031328)	0.070273	0.173206	4.79118	12.7224	CCL5;HBB
GO_Biological_Process_2023	Regulation Of Neuron Migration (GO:2001222)	0.0700658	0.173206	14.5204	38.5999	COL3A1
GO_Biological_Process_2023	Positive Regulation Of Viral Genome Replication (GO:0045070)	0.0700658	0.173206	14.5204	38.5999	CCL5
GO_Biological_Process_2023	Phosphatidic Acid Biosynthetic Process (GO:0006654)	0.0700658	0.173206	14.5204	38.5999	AGPAT2
GO_Biological_Process_2023	Positive Regulation Of B Cell Proliferation (GO:0030890)	0.0700658	0.173206	14.5204	38.5999	TFRC
GO_Biological_Process_2023	Positive Regulation Of Calcium Ion Transport (GO:0051928)	0.0700658	0.173206	14.5204	38.5999	CCL5
GO_Biological_Process_2023	Regulation Of Cholesterol Efflux (GO:0010874)	0.0770333	0.176791	13.1132	33.616	YJEFN3
GO_Biological_Process_2023	Transition Metal Ion Transport (GO:0000041)	0.0770333	0.176791	13.1132	33.616	TFRC
GO_Biological_Process_2023	Actin Filament Bundle Assembly (GO:0051017)	0.0793444	0.178525	12.7028	32.1884	AIF1
GO_Biological_Process_2023	Actin Filament Bundle Organization (GO:0061572)	0.0793444	0.178525	12.7028	32.1884	AIF1
GO_Biological_Process_2023	Negative Regulation Of Small Molecule Metabolic Process (GO:0062014)	0.0793444	0.178525	12.7028	32.1884	ERFE
GO_Biological_Process_2023	Phosphatidic Acid Metabolic Process (GO:0046473)	0.0793444	0.178525	12.7028	32.1884	AGPAT2
GO_Biological_Process_2023	Positive Regulation Of Immunoglobulin Production (GO:0002639)	0.0816498	0.180155	12.3173	30.8586	TFRC
GO_Biological_Process_2023	Superoxide Metabolic Process (GO:0006801)	0.0816498	0.180155	12.3173	30.8586	SOD3
GO_Biological_Process_2023	Regulation Of calcineurin-NFAT Signaling Cascade (GO:0070884)	0.0816498	0.180155	12.3173	30.8586	HOMER3
GO_Biological_Process_2023	Semaphorin-Plexin Signaling Pathway (GO:0071526)	0.0816498	0.180155	12.3173	30.8586	PLXND1
GO_Biological_Process_2023	Glutamate Receptor Signaling Pathway (GO:0007215)	0.0839496	0.180155	11.9544	29.6174	HOMER3
GO_Biological_Process_2023	Macrophage Activation (GO:0042116)	0.0839496	0.180155	11.9544	29.6174	AIF1
GO_Biological_Process_2023	Platelet Aggregation (GO:0070527)	0.0839496	0.180155	11.9544	29.6174	HBB
GO_Biological_Process_2023	Endoderm Formation (GO:0001706)	0.0839496	0.180155	11.9544	29.6174	MMP2
GO_Biological_Process_2023	Protein Localization To Membrane (GO:0072657)	0.0832524	0.180155	4.33333	10.7721	ANK1;PRAM1
GO_Biological_Process_2023	Regulation Of Signal Transduction (GO:0009966)	0.0839939	0.180155	4.31043	10.677	YJEFN3;IGFBP7
GO_Biological_Process_2023	Regulation Of Glucose Import (GO:0046324)	0.0862437	0.183268	11.6122	28.4567	ERFE
GO_Biological_Process_2023	Positive Regulation Of Phospholipase C Activity (GO:0010863)	0.0862437	0.183268	11.6122	28.4567	LPAR2
GO_Biological_Process_2023	Negative Regulation Of Smooth Muscle Cell Proliferation (GO:0048662)	0.0885322	0.18471	11.2891	27.3692	AIF1
GO_Biological_Process_2023	Positive Regulation Of Receptor Signaling Pathway Via JAK-STAT (GO:0046427)	0.0885322	0.18471	11.2891	27.3692	CCL5
GO_Biological_Process_2023	Positive Regulation Of Receptor Signaling Pathway Via STAT (GO:1904894)	0.0885322	0.18471	11.2891	27.3692	CCL5
GO_Biological_Process_2023	Regulation Of Vascular Associated Smooth Muscle Cell Proliferation (GO:1904705)	0.0885322	0.18471	11.2891	27.3692	MMP2
GO_Biological_Process_2023	Positive Regulation Of Axonogenesis (GO:0050772)	0.0908151	0.187766	10.9835	26.3485	PLXND1
GO_Biological_Process_2023	Response To Peptide (GO:1901652)	0.0908151	0.187766	10.9835	26.3485	MMP2
GO_Molecular_Function_2023	CCR Chemokine Receptor Binding (GO:0048020)	0.104395	0.187986	9.44803	21.3485	CCL5
GO_Molecular_Function_2023	Transition Metal Ion Binding (GO:0046914)	0.105455	0.187986	2.74722	6.17978	S100A13;TIMP2;SOD3
GO_Biological_Process_2023	Regulation Of GTPase Activity (GO:0043087)	0.100019	0.190148	3.87932	8.93172	PLXND1;CCL5
GO_Biological_Process_2023	Regulation Of Cell Migration (GO:0030334)	0.0943328	0.190148	2.8907	6.82474	PLXND1;CCL5;AIF1
GO_Biological_Process_2023	Negative Regulation Of Mitochondrion Organization (GO:0010823)	0.0930924	0.190148	10.6939	25.389	TFRC
GO_Biological_Process_2023	Regulation Of Nitric Oxide Biosynthetic Process (GO:0045428)	0.0930924	0.190148	10.6939	25.389	HBB
GO_Biological_Process_2023	Regulation Of Cytokine-Mediated Signaling Pathway (GO:0001959)	0.0953641	0.190148	10.4192	24.4856	AGPAT2
GO_Biological_Process_2023	Positive Regulation Of Monoatomic Ion Transport (GO:0043270)	0.0953641	0.190148	10.4192	24.4856	CCL5
GO_Biological_Process_2023	Positive Regulation Of Myeloid Leukocyte Differentiation (GO:0002763)	0.0953641	0.190148	10.4192	24.4856	PF4
GO_Biological_Process_2023	Positive Regulation Of Cell Cycle G1/S Phase Transition (GO:1902808)	0.0953641	0.190148	10.4192	24.4856	AIF1
GO_Biological_Process_2023	Endothelial Cell Migration (GO:0043542)	0.0953641	0.190148	10.4192	24.4856	PLXND1
GO_Biological_Process_2023	Regulation Of Chemokine Production (GO:0032642)	0.0976302	0.190148	10.1582	23.6337	AIF1
GO_Biological_Process_2023	Negative Regulation Of Proteolysis (GO:0045861)	0.0976302	0.190148	10.1582	23.6337	TIMP2
GO_Biological_Process_2023	Positive Regulation Of Response To Biotic Stimulus (GO:0002833)	0.0976302	0.190148	10.1582	23.6337	CCL5
GO_Biological_Process_2023	Positive Regulation Of Viral Process (GO:0048524)	0.0976302	0.190148	10.1582	23.6337	CCL5
GO_Biological_Process_2023	Lymphocyte Migration (GO:0072676)	0.0976302	0.190148	10.1582	23.6337	CCL5
GO_Biological_Process_2023	Lysosome Localization (GO:0032418)	0.0998908	0.190148	9.90991	22.8292	S100A13
GO_Biological_Process_2023	Modulation By Host Of Symbiont Process (GO:0051851)	0.0998908	0.190148	9.90991	22.8292	CCL5
GO_Biological_Process_2023	Monocyte Chemotaxis (GO:0002548)	0.0998908	0.190148	9.90991	22.8292	CCL5
GO_Biological_Process_2023	Collagen Fibril Organization (GO:0030199)	0.0998908	0.190148	9.90991	22.8292	COL3A1
GO_Biological_Process_2023	Regulation Of Axonogenesis (GO:0050770)	0.0998908	0.190148	9.90991	22.8292	PLXND1
GO_Biological_Process_2023	Response To Amyloid-Beta (GO:1904645)	0.102146	0.190148	9.67347	22.0686	MMP2
GO_Biological_Process_2023	Ephrin Receptor Signaling Pathway (GO:0048013)	0.102146	0.190148	9.67347	22.0686	MMP2
GO_Biological_Process_2023	Negative Regulation Of Immune System Process (GO:0002683)	0.104395	0.190148	9.44803	21.3485	COL3A1
GO_Biological_Process_2023	Regulation Of Insulin Receptor Signaling Pathway (GO:0046626)	0.104395	0.190148	9.44803	21.3485	ERFE
GO_Biological_Process_2023	Lymphocyte Chemotaxis (GO:0048247)	0.104395	0.190148	9.44803	21.3485	CCL5
GO_Biological_Process_2023	Phosphatidylinositol Phosphate Biosynthetic Process (GO:0046854)	0.104395	0.190148	9.44803	21.3485	CISH
GO_Biological_Process_2023	Regulation Of B Cell Proliferation (GO:0030888)	0.104395	0.190148	9.44803	21.3485	TFRC
GO_Biological_Process_2023	Regulation Of Viral Entry Into Host Cell (GO:0046596)	0.104395	0.190148	9.44803	21.3485	LGALS1
GO_Biological_Process_2023	Positive Regulation Of Biosynthetic Process (GO:0009891)	0.104395	0.190148	9.44803	21.3485	CCL5
GO_Biological_Process_2023	Positive Regulation Of Chemotaxis (GO:0050921)	0.104395	0.190148	9.44803	21.3485	AIF1
GO_Biological_Process_2023	Positive Regulation Of Cytokine-Mediated Signaling Pathway (GO:0001961)	0.104395	0.190148	9.44803	21.3485	AGPAT2
GO_Biological_Process_2023	Positive Regulation Of Cell Motility (GO:2000147)	0.10554	0.191474	3.754	8.44147	CCL5;AIF1
GO_Biological_Process_2023	Positive Regulation Of Innate Immune Response (GO:0045089)	0.106639	0.191951	9.23284	20.6659	CCL5
GO_Biological_Process_2023	Triglyceride Metabolic Process (GO:0006641)	0.106639	0.191951	9.23284	20.6659	LPIN2
GO_Biological_Process_2023	Epithelial Cell Migration (GO:0010631)	0.108878	0.192953	9.02721	20.0181	PLXND1
GO_Biological_Process_2023	Homotypic Cell-Cell Adhesion (GO:0034109)	0.108878	0.192953	9.02721	20.0181	HBB
GO_Biological_Process_2023	Myofibril Assembly (GO:0030239)	0.108878	0.192953	9.02721	20.0181	TMOD1
GO_Biological_Process_2023	Positive Regulation Of Cell-Cell Adhesion (GO:0022409)	0.108878	0.192953	9.02721	20.0181	CCL5
GO_Biological_Process_2023	Regulation Of Cell Growth (GO:0001558)	0.110338	0.194789	3.65278	8.05148	CISH;TFRC
GO_Biological_Process_2023	Regulation Of Interleukin-2 Production (GO:0032663)	0.111111	0.195401	8.83052	19.4027	HOMER3
GO_Biological_Process_2023	Positive Regulation Of Phosphorylation (GO:0042327)	0.113569	0.198205	3.58825	7.80568	TFRC;CCL5
GO_Biological_Process_2023	Chloride Transmembrane Transport (GO:1902476)	0.113338	0.198205	8.64221	18.8174	SLC4A1
GO_Biological_Process_2023	Regulation Of Cell Communication (GO:0010646)	0.11556	0.200917	8.46173	18.2601	IGFBP7
GO_Molecular_Function_2023	Pyrophosphatase Activity (GO:0016462)	0.11556	0.201615	8.46173	18.2601	PHOSPHO1
GO_Cellular_Component_2023	Cytoskeleton (GO:0005856)	0.0622191	0.204957	2.82864	7.85541	EPB42;SLC4A1;CAPG;ANK1
GO_Cellular_Component_2023	Specific Granule (GO:0042581)	0.0600326	0.204957	5.25292	14.7758	TIMP2;AGPAT2
GO_Cellular_Component_2023	Endocytic Vesicle Membrane (GO:0030666)	0.0600326	0.204957	5.25292	14.7758	TFRC;STAB1
GO_Cellular_Component_2023	Tertiary Granule (GO:0070820)	0.062036	0.204957	5.15365	14.3273	TIMP2;HBB
GO_Biological_Process_2023	Regulation Of Inflammatory Response (GO:0050727)	0.120927	0.205446	3.45098	7.29044	LGALS1;CCL5
GO_Biological_Process_2023	Positive Regulation Of DNA Recombination (GO:0045911)	0.119988	0.205446	8.12245	17.2226	TFRC
GO_Biological_Process_2023	Receptor Internalization (GO:0031623)	0.119988	0.205446	8.12245	17.2226	TFRC
GO_Biological_Process_2023	Positive Regulation Of Ras Protein Signal Transduction (GO:0046579)	0.119988	0.205446	8.12245	17.2226	COL3A1
GO_Biological_Process_2023	Sprouting Angiogenesis (GO:0002040)	0.122193	0.205446	7.96279	16.739	YJEFN3
GO_Biological_Process_2023	Negative Regulation Of Response To Stimulus (GO:0048585)	0.122193	0.205446	7.96279	16.739	COL3A1
GO_Biological_Process_2023	Regulation Of Peptide Hormone Secretion (GO:0090276)	0.122193	0.205446	7.96279	16.739	CCL5
GO_Biological_Process_2023	Regulation Of Protein Localization To Nucleus (GO:1900180)	0.122193	0.205446	7.96279	16.739	TFRC
GO_Biological_Process_2023	Positive Regulation Of B Cell Activation (GO:0050871)	0.122193	0.205446	7.96279	16.739	TFRC
GO_Biological_Process_2023	Negative Regulation Of Viral Genome Replication (GO:0045071)	0.124393	0.206872	7.80926	16.2769	CCL5
GO_Biological_Process_2023	Regulation Of Receptor Signaling Pathway Via JAK-STAT (GO:0046425)	0.124393	0.206872	7.80926	16.2769	CCL5
GO_Biological_Process_2023	Positive Regulation Of Chemokine Production (GO:0032722)	0.124393	0.206872	7.80926	16.2769	AIF1
GO_Molecular_Function_2023	Phosphoric Ester Hydrolase Activity (GO:0042578)	0.122193	0.208169	7.96279	16.739	PHOSPHO1
GO_Molecular_Function_2023	Antiporter Activity (GO:0015297)	0.124393	0.208169	7.80926	16.2769	SLC4A1
GO_Biological_Process_2023	Negative Regulation Of Protein Catabolic Process (GO:0042177)	0.126588	0.208258	7.66153	15.835	TIMP2
GO_Biological_Process_2023	Regulation Of Smooth Muscle Cell Proliferation (GO:0048660)	0.126588	0.208258	7.66153	15.835	CCL5
GO_Biological_Process_2023	Monoatomic Anion Transmembrane Transport (GO:0098656)	0.126588	0.208258	7.66153	15.835	SLC4A1
GO_Biological_Process_2023	Positive Regulation Of Tyrosine Phosphorylation Of STAT Protein (GO:0042531)	0.128778	0.210352	7.51927	15.412	CCL5
GO_Biological_Process_2023	Cellular Response To Fibroblast Growth Factor Stimulus (GO:0044344)	0.128778	0.210352	7.51927	15.412	CCL5
GO_Molecular_Function_2023	Chloride Transmembrane Transporter Activity (GO:0015108)	0.128778	0.211196	7.51927	15.412	SLC4A1
GO_Biological_Process_2023	Positive Regulation Of Cellular Metabolic Process (GO:0031325)	0.130962	0.213161	7.38219	15.0069	CCL5
GO_Biological_Process_2023	Monoatomic Anion Transport (GO:0006820)	0.133141	0.215942	7.25	14.6185	SLC4A1
GO_Biological_Process_2023	Cytokine-Mediated Signaling Pathway (GO:0019221)	0.135136	0.217165	3.21814	6.44102	CCL5;PF4
GO_Biological_Process_2023	Inorganic Anion Transport (GO:0015698)	0.135314	0.217165	7.12245	14.246	SLC4A1
GO_Biological_Process_2023	Response To Organic Cyclic Compound (GO:0014070)	0.135314	0.217165	7.12245	14.246	CCL5
GO_Cellular_Component_2023	Myofibril (GO:0030016)	0.0700658	0.217982	14.5204	38.5999	TMOD1
GO_Biological_Process_2023	Cellular Component Assembly (GO:0022607)	0.137682	0.220196	3.18023	6.30579	CAPG;AIF1
GO_Biological_Process_2023	Negative Regulation Of Peptidase Activity (GO:0010466)	0.139645	0.222558	6.88032	13.545	TIMP2
GO_Biological_Process_2023	Fatty Acid Catabolic Process (GO:0009062)	0.141802	0.223667	6.76531	13.2148	LPIN2
GO_Biological_Process_2023	Positive Regulation Of Organelle Assembly (GO:1902117)	0.141802	0.223667	6.76531	13.2148	CAPG
GO_Biological_Process_2023	Negative Regulation Of Viral Process (GO:0048525)	0.141802	0.223667	6.76531	13.2148	CCL5
GO_Biological_Process_2023	Positive Regulation Of Signal Transduction (GO:0009967)	0.142807	0.224481	3.10701	6.04705	ERFE;AGPAT2
GO_Biological_Process_2023	Regulation Of T Cell Activation (GO:0050863)	0.143954	0.225511	6.65406	12.8973	CCL5
GO_Biological_Process_2023	Positive Regulation Of Mitotic Cell Cycle Phase Transition (GO:1901992)	0.146101	0.226555	6.54641	12.5918	AIF1
GO_Biological_Process_2023	Inorganic Anion Transmembrane Transport (GO:0098661)	0.146101	0.226555	6.54641	12.5918	SLC4A1
GO_Biological_Process_2023	Protein Polymerization (GO:0051258)	0.146101	0.226555	6.54641	12.5918	FHDC1
GO_Biological_Process_2023	Positive Regulation Of Cell Migration (GO:0030335)	0.147973	0.227569	3.03704	5.80294	CCL5;AIF1
GO_Biological_Process_2023	Positive Regulation Of Interleukin-1 Production (GO:0032732)	0.148242	0.227569	6.44218	12.2975	S100A13
GO_Biological_Process_2023	Cellular Response To Virus (GO:0098586)	0.148242	0.227569	6.44218	12.2975	CCL5
GO_Biological_Process_2023	Plasma Membrane Bounded Cell Projection Assembly (GO:0120031)	0.150571	0.228092	3.00321	5.68603	FHDC1;AIF1
GO_Biological_Process_2023	Antimicrobial Humoral Immune Response Mediated By Antimicrobial Peptide (GO:0061844)	0.150378	0.228092	6.3412	12.014	PF4
GO_Biological_Process_2023	Regulation Of Translational Initiation (GO:0006446)	0.150378	0.228092	6.3412	12.014	CCL5
GO_Biological_Process_2023	Regulation Of Tyrosine Phosphorylation Of STAT Protein (GO:0042509)	0.150378	0.228092	6.3412	12.014	CCL5
GO_Cellular_Component_2023	Ficolin-1-Rich Granule (GO:0101002)	0.0773958	0.228114	4.52564	11.5803	TIMP2;HBB
GO_Biological_Process_2023	Negative Regulation Of Endopeptidase Activity (GO:0010951)	0.152509	0.229514	6.24333	11.7408	TIMP2
GO_Biological_Process_2023	Negative Regulation Of Immune Response (GO:0050777)	0.152509	0.229514	6.24333	11.7408	COL3A1
GO_Biological_Process_2023	Regulation Of Viral Genome Replication (GO:0045069)	0.154635	0.231197	6.14842	11.4772	CCL5
GO_Biological_Process_2023	Negative Regulation Of Cellular Catabolic Process (GO:0031330)	0.154635	0.231197	6.14842	11.4772	TIMP2
GO_Biological_Process_2023	Skin Development (GO:0043588)	0.156756	0.233607	6.05635	11.2228	COL3A1
GO_Biological_Process_2023	Regulation Of Endopeptidase Activity (GO:0052548)	0.158871	0.233724	5.96699	10.9772	TIMP2
GO_Biological_Process_2023	Positive Regulation Of Phosphatidylinositol 3-Kinase Signaling (GO:0014068)	0.158871	0.233724	5.96699	10.9772	CCL5
GO_Biological_Process_2023	Phagocytosis (GO:0006909)	0.158871	0.233724	5.96699	10.9772	AIF1
GO_Biological_Process_2023	Phospholipid Metabolic Process (GO:0006644)	0.158871	0.233724	5.96699	10.9772	AGPAT2
GO_Biological_Process_2023	Negative Regulation Of Extrinsic Apoptotic Signaling Pathway (GO:2001237)	0.160981	0.23383	5.88021	10.74	PF4
GO_Biological_Process_2023	Regulation Of G Protein-Coupled Receptor Signaling Pathway (GO:0008277)	0.160981	0.23383	5.88021	10.74	CCL5
GO_Biological_Process_2023	Regulation Of Notch Signaling Pathway (GO:0008593)	0.160981	0.23383	5.88021	10.74	YJEFN3
GO_Biological_Process_2023	Regulation Of Cellular Biosynthetic Process (GO:0031326)	0.160981	0.23383	5.88021	10.74	CCL5
GO_Biological_Process_2023	Synapse Assembly (GO:0007416)	0.163086	0.235398	5.79592	10.5108	PLXND1
GO_Biological_Process_2023	Regulation Of Hydrolase Activity (GO:0051336)	0.163086	0.235398	5.79592	10.5108	PLXND1
GO_Biological_Process_2023	Transforming Growth Factor Beta Receptor Signaling Pathway (GO:0007179)	0.165186	0.2362	5.714	10.2891	COL3A1
GO_Biological_Process_2023	Positive Regulation Of Protein Localization To Nucleus (GO:1900182)	0.165186	0.2362	5.714	10.2891	TFRC
GO_Biological_Process_2023	Negative Regulation Of Cell Adhesion (GO:0007162)	0.165186	0.2362	5.714	10.2891	PLXND1
GO_Biological_Process_2023	Regulation Of Rho Protein Signal Transduction (GO:0035023)	0.16728	0.238452	5.63435	10.0747	COL3A1
GO_Molecular_Function_2023	Double-Stranded RNA Binding (GO:0003725)	0.150378	0.241785	6.3412	12.014	TFRC
GO_Biological_Process_2023	Positive Regulation Of Neurogenesis (GO:0050769)	0.171454	0.243645	5.48152	9.66634	PLXND1
GO_Biological_Process_2023	Positive Regulation Of Interleukin-6 Production (GO:0032755)	0.173533	0.245839	5.40816	9.47179	AIF1
GO_Biological_Process_2023	Regulation Of Immune Response (GO:0050776)	0.175607	0.247251	5.33673	9.28328	COL3A1
GO_Biological_Process_2023	Chloride Transport (GO:0006821)	0.175607	0.247251	5.33673	9.28328	SLC4A1
GO_Biological_Process_2023	Regulation Of Innate Immune Response (GO:0045088)	0.177676	0.248638	5.26716	9.10056	CCL5
GO_Biological_Process_2023	Positive Regulation Of Tumor Necrosis Factor Production (GO:0032760)	0.177676	0.248638	5.26716	9.10056	PF4
GO_Biological_Process_2023	Cellular Response To UV (GO:0034644)	0.17974	0.250002	5.19937	8.92339	MMP2
GO_Biological_Process_2023	Response To Insulin (GO:0032868)	0.17974	0.250002	5.19937	8.92339	LPIN2
GO_Biological_Process_2023	Positive Regulation Of Immune Response (GO:0050778)	0.181799	0.251342	5.1333	8.75153	CCL5
GO_Biological_Process_2023	Wound Healing (GO:0042060)	0.181799	0.251342	5.1333	8.75153	COL3A1
GO_Biological_Process_2023	Cellular Response To Interleukin-1 (GO:0071347)	0.183852	0.253418	5.06888	8.58476	CCL5
GO_Biological_Process_2023	Positive Regulation Of Tumor Necrosis Factor Superfamily Cytokine Production (GO:1903557)	0.185901	0.253954	5.00605	8.42288	PF4
GO_Biological_Process_2023	Regulation Of Phosphorylation (GO:0042325)	0.185901	0.253954	5.00605	8.42288	CCL5
GO_Biological_Process_2023	Cellular Response To Organic Substance (GO:0071310)	0.185901	0.253954	5.00605	8.42288	CCL5
GO_Biological_Process_2023	Supramolecular Fiber Organization (GO:0097435)	0.186903	0.254566	2.60563	4.37006	TMOD1;COL3A1
GO_Biological_Process_2023	Vascular Transport (GO:0010232)	0.187945	0.255227	4.94475	8.26568	TFRC
GO_Molecular_Function_2023	Hormone Activity (GO:0005179)	0.16937	0.257191	5.55689	9.86721	ERFE
GO_Molecular_Function_2023	ATPase Binding (GO:0051117)	0.16728	0.257191	5.63435	10.0747	ANK1
GO_Molecular_Function_2023	Phosphatidylinositol-4,5-Bisphosphate Binding (GO:0005546)	0.16728	0.257191	5.63435	10.0747	CAPG
GO_Biological_Process_2023	Transport Across Blood-Brain Barrier (GO:0150104)	0.192017	0.258463	4.82653	7.9646	TFRC
GO_Biological_Process_2023	Positive Regulation Of Protein Localization (GO:1903829)	0.192017	0.258463	4.82653	7.9646	TFRC
GO_Biological_Process_2023	Response To Interleukin-1 (GO:0070555)	0.192017	0.258463	4.82653	7.9646	CCL5
GO_Biological_Process_2023	Regulation Of Insulin Secretion (GO:0050796)	0.196069	0.263145	4.71381	7.68016	CCL5
GO_Biological_Process_2023	Positive Regulation Of Cell Adhesion (GO:0045785)	0.198088	0.263927	4.65939	7.54377	CCL5
GO_Biological_Process_2023	Positive Regulation Of Peptidyl-Serine Phosphorylation (GO:0033138)	0.200101	0.263927	4.60622	7.41108	TFRC
GO_Biological_Process_2023	Organic Anion Transport (GO:0015711)	0.200101	0.263927	4.60622	7.41108	SLC4A1
GO_Biological_Process_2023	Cellular Response To Chemical Stress (GO:0062197)	0.200101	0.263927	4.60622	7.41108	AIF1
GO_Biological_Process_2023	Cellular Response To Peptide Hormone Stimulus (GO:0071375)	0.200101	0.263927	4.60622	7.41108	LPIN2
GO_Biological_Process_2023	Proteolysis (GO:0006508)	0.199594	0.263927	2.49263	4.0168	MMP2;TPSAB1
GO_Biological_Process_2023	Regulation Of Phosphatidylinositol 3-Kinase Signaling (GO:0014066)	0.20211	0.265812	4.55423	7.28196	CCL5
GO_Biological_Process_2023	Regulation Of Peptidyl-Serine Phosphorylation (GO:0033135)	0.208106	0.272139	4.40506	6.91464	TFRC
GO_Biological_Process_2023	Positive Regulation Of Cellular Component Biogenesis (GO:0044089)	0.208106	0.272139	4.40506	6.91464	TFRC
GO_Biological_Process_2023	Muscle Contraction (GO:0006936)	0.210095	0.27396	4.35747	6.7985	TMOD1
GO_Biological_Process_2023	T Cell Receptor Signaling Pathway (GO:0050852)	0.21208	0.274984	4.3109	6.68532	PRAM1
GO_Biological_Process_2023	Cell Junction Assembly (GO:0034329)	0.21208	0.274984	4.3109	6.68532	PLXND1
GO_Biological_Process_2023	Cellular Response To Transforming Growth Factor Beta Stimulus (GO:0071560)	0.214059	0.276769	4.26531	6.57499	COL3A1
GO_Biological_Process_2023	Negative Regulation Of Macromolecule Biosynthetic Process (GO:0010558)	0.218003	0.279506	4.17694	6.36252	PF4
GO_Biological_Process_2023	MAPK Cascade (GO:0000165)	0.218003	0.279506	4.17694	6.36252	CCL5
GO_Biological_Process_2023	Phosphatidylinositol Biosynthetic Process (GO:0006661)	0.218003	0.279506	4.17694	6.36252	CISH
GO_Biological_Process_2023	Cellular Response To Insulin Stimulus (GO:0032869)	0.219967	0.281239	4.13411	6.26019	LPIN2
GO_Biological_Process_2023	Antimicrobial Humoral Response (GO:0019730)	0.221927	0.282957	4.09215	6.16035	PF4
GO_Biological_Process_2023	Hemopoiesis (GO:0030097)	0.223882	0.284659	4.05102	6.06291	YJEFN3
GO_Biological_Process_2023	Calcium Ion Homeostasis (GO:0055074)	0.225832	0.285556	4.01071	5.96779	CCL5
GO_Biological_Process_2023	Regulation Of Protein Secretion (GO:0050708)	0.225832	0.285556	4.01071	5.96779	CCL5
GO_Molecular_Function_2023	Growth Factor Activity (GO:0008083)	0.192017	0.28628	4.82653	7.9646	CLEC11A
GO_Biological_Process_2023	Positive Regulation Of Inflammatory Response (GO:0050729)	0.229718	0.289672	3.93244	5.78423	LGALS1
GO_Biological_Process_2023	Positive Regulation Of Macromolecule Metabolic Process (GO:0010604)	0.230812	0.290254	2.2546	3.30559	TFRC;PF4
GO_Biological_Process_2023	Regulation Of G1/S Transition Of Mitotic Cell Cycle (GO:2000045)	0.233585	0.292938	3.85714	5.6091	AIF1
GO_Biological_Process_2023	Monoatomic Ion Transport (GO:0006811)	0.235511	0.294545	3.82056	5.52453	SLC4A1
GO_Biological_Process_2023	Glycerophospholipid Biosynthetic Process (GO:0046474)	0.237432	0.294545	3.78467	5.44187	AGPAT2
GO_Biological_Process_2023	Positive Regulation Of Translation (GO:0045727)	0.237432	0.294545	3.78467	5.44187	CCL5
GO_Biological_Process_2023	Response To Tumor Necrosis Factor (GO:0034612)	0.237432	0.294545	3.78467	5.44187	CCL5
GO_Biological_Process_2023	Negative Regulation Of Developmental Process (GO:0051093)	0.239349	0.295326	3.74943	5.36106	TFRC
GO_Biological_Process_2023	Cell-Matrix Adhesion (GO:0007160)	0.239349	0.295326	3.74943	5.36106	COL3A1
GO_Molecular_Function_2023	Phosphatidylinositol Bisphosphate Binding (GO:1902936)	0.208106	0.296389	4.40506	6.91464	CAPG
GO_Molecular_Function_2023	Endopeptidase Activity (GO:0004175)	0.204154	0.296389	2.45458	3.90004	MMP2;TPSAB1
GO_Molecular_Function_2023	Zinc Ion Binding (GO:0008270)	0.209641	0.296389	2.4104	3.76591	S100A13;TIMP2
GO_Biological_Process_2023	Adenylate Cyclase-Activating G Protein-Coupled Receptor Signaling Pathway (GO:0007189)	0.241261	0.296887	3.71485	5.28205	PF4
GO_Molecular_Function_2023	Calcium Ion Binding (GO:0005509)	0.214226	0.297738	2.37476	3.65884	S100A13;AIF1
GO_Biological_Process_2023	Cytoskeleton Organization (GO:0007010)	0.243169	0.298434	3.68089	5.20478	ANK1
GO_Biological_Process_2023	Calcium Ion Transport (GO:0006816)	0.245071	0.299169	3.64755	5.1292	CCL5
GO_Biological_Process_2023	Negative Regulation Of Cell Population Proliferation (GO:0008285)	0.244705	0.299169	2.16324	3.04519	IGFBP7;AIF1
GO_Biological_Process_2023	Positive Regulation Of Cellular Component Organization (GO:0051130)	0.246969	0.300687	3.6148	5.05526	TFRC
GO_Molecular_Function_2023	Cytokine Receptor Binding (GO:0005126)	0.221927	0.300956	4.09215	6.16035	CCL5
GO_Molecular_Function_2023	Metalloendopeptidase Activity (GO:0004222)	0.223882	0.300956	4.05102	6.06291	MMP2
GO_Biological_Process_2023	Regulation Of Interleukin-6 Production (GO:0032675)	0.248862	0.30219	3.58263	4.98291	AIF1
GO_Biological_Process_2023	Positive Regulation Of Multicellular Organismal Process (GO:0051240)	0.252133	0.305353	2.11742	2.91739	S100A13;AGPAT2
GO_Biological_Process_2023	Cellular Response To Molecule Of Bacterial Origin (GO:0071219)	0.254514	0.30662	3.48944	4.77495	PF4
GO_Biological_Process_2023	Cellular Response To Oxidative Stress (GO:0034599)	0.254514	0.30662	3.48944	4.77495	AIF1
GO_Biological_Process_2023	Positive Regulation Of Cell Projection Organization (GO:0031346)	0.256389	0.308069	3.45945	4.70851	PLXND1
GO_Biological_Process_2023	Regulation Of Protein-Containing Complex Assembly (GO:0043254)	0.258259	0.3087	3.42996	4.64345	TFRC
GO_Biological_Process_2023	Cellular Response To Tumor Necrosis Factor (GO:0071356)	0.258259	0.3087	3.42996	4.64345	CCL5
GO_Biological_Process_2023	Fatty Acid Metabolic Process (GO:0006631)	0.263842	0.314554	3.34441	4.45611	LPIN2
GO_Biological_Process_2023	Organonitrogen Compound Biosynthetic Process (GO:1901566)	0.265693	0.315125	3.31683	4.39617	ALAS2
GO_Biological_Process_2023	Regulation Of Cell Motility (GO:2000145)	0.265693	0.315125	3.31683	4.39617	PLXND1
GO_Molecular_Function_2023	Phosphatase Binding (GO:0019902)	0.245071	0.318982	3.64755	5.1292	ANK1
GO_Molecular_Function_2023	Endopeptidase Inhibitor Activity (GO:0004866)	0.245071	0.318982	3.64755	5.1292	TIMP2
GO_Biological_Process_2023	Protein-Containing Complex Organization (GO:0043933)	0.271221	0.320852	3.23673	4.22336	CAPG
GO_Molecular_Function_2023	Protein Phosphatase Binding (GO:0019903)	0.250751	0.321275	3.55102	4.91211	ANK1
GO_Biological_Process_2023	Regulation Of Tumor Necrosis Factor Production (GO:0032680)	0.273054	0.321364	3.21088	4.168	PF4
GO_Biological_Process_2023	Regulation Of Anatomical Structure Morphogenesis (GO:0022603)	0.273054	0.321364	3.21088	4.168	PLXND1
GO_Biological_Process_2023	Vesicle-Mediated Transport (GO:0016192)	0.274452	0.322182	1.99073	2.57397	CCL5;ANK1
GO_Biological_Process_2023	Protein Targeting (GO:0006605)	0.276708	0.323656	3.1604	4.06045	HOMER3
GO_Biological_Process_2023	Golgi Organization (GO:0007030)	0.278528	0.323656	3.13574	4.00822	FHDC1
GO_Biological_Process_2023	Transmembrane Receptor Protein Serine/Threonine Kinase Signaling Pathway (GO:0007178)	0.278528	0.323656	3.13574	4.00822	COL3A1
GO_Biological_Process_2023	Positive Regulation Of Peptidyl-Tyrosine Phosphorylation (GO:0050731)	0.278528	0.323656	3.13574	4.00822	CCL5
GO_Biological_Process_2023	Synapse Organization (GO:0050808)	0.280343	0.324943	3.11146	3.95697	PLXND1
GO_Biological_Process_2023	Circulatory System Development (GO:0072359)	0.282154	0.326219	3.08755	3.90668	COL3A1
GO_Biological_Process_2023	Antigen Receptor-Mediated Signaling Pathway (GO:0050851)	0.285763	0.329561	3.04082	3.8089	PRAM1
GO_Biological_Process_2023	Non-Membrane-Bounded Organelle Assembly (GO:0140694)	0.287561	0.330803	3.01797	3.76136	TMOD1
GO_Biological_Process_2023	Negative Regulation Of Cellular Biosynthetic Process (GO:0031327)	0.291143	0.334086	2.97329	3.66887	ERFE
GO_Biological_Process_2023	Intracellular Calcium Ion Homeostasis (GO:0006874)	0.294707	0.33672	2.9299	3.57968	CCL5
GO_Biological_Process_2023	Nervous System Development (GO:0007399)	0.294905	0.33672	1.88699	2.30421	PLXND1;CAPG
GO_Molecular_Function_2023	Metallopeptidase Activity (GO:0008237)	0.26754	0.337512	3.2897	4.33741	MMP2
GO_Biological_Process_2023	Ras Protein Signal Transduction (GO:0007265)	0.303541	0.34572	2.82674	3.37015	AIF1
GO_Biological_Process_2023	Positive Regulation Of Protein Kinase Activity (GO:0045860)	0.305295	0.346857	2.80697	3.33041	CCL5
GO_Biological_Process_2023	Regulation Of Gene Expression (GO:0010468)	0.310626	0.352043	1.45782	1.70443	TFRC;AIF1;PF4;KLF1
GO_Biological_Process_2023	Axon Guidance (GO:0007411)	0.312267	0.353031	2.73056	3.17809	PLXND1
GO_Biological_Process_2023	Cellular Response To Organic Cyclic Compound (GO:0071407)	0.317451	0.357132	2.6759	3.07042	CCL5
GO_Biological_Process_2023	Positive Regulation Of NF-kappaB Transcription Factor Activity (GO:0051092)	0.317451	0.357132	2.6759	3.07042	TFRC
GO_Biological_Process_2023	Cellular Response To Growth Factor Stimulus (GO:0071363)	0.322596	0.362033	2.62338	2.96797	CCL5
GO_Cellular_Component_2023	Extracellular Vesicle (GO:1903561)	0.139645	0.365763	6.88032	13.545	TFRC
GO_Cellular_Component_2023	Specific Granule Lumen (GO:0035580)	0.141802	0.365763	6.76531	13.2148	TIMP2
GO_Cellular_Component_2023	Cortical Cytoskeleton (GO:0030863)	0.146101	0.365763	6.54641	12.5918	SLC4A1
GO_Cellular_Component_2023	Platelet Alpha Granule Lumen (GO:0031093)	0.152509	0.365763	6.24333	11.7408	PF4
GO_Cellular_Component_2023	Clathrin-Coated Endocytic Vesicle Membrane (GO:0030669)	0.156756	0.365763	6.05635	11.2228	TFRC
GO_Biological_Process_2023	Response To Lipopolysaccharide (GO:0032496)	0.329398	0.368765	2.55645	2.8389	PF4
GO_Biological_Process_2023	Regulation Of Macromolecule Metabolic Process (GO:0060255)	0.334455	0.373516	2.50843	2.74736	AIF1
GO_Biological_Process_2023	Adenylate Cyclase-Modulating G Protein-Coupled Receptor Signaling Pathway (GO:0007188)	0.336133	0.373571	2.49282	2.71779	PF4
GO_Biological_Process_2023	Negative Regulation Of Cell Migration (GO:0030336)	0.336133	0.373571	2.49282	2.71779	COL3A1
GO_Cellular_Component_2023	Clathrin-Coated Endocytic Vesicle (GO:0045334)	0.192017	0.377272	4.82653	7.9646	TFRC
GO_Cellular_Component_2023	Platelet Alpha Granule (GO:0031091)	0.200101	0.377272	4.60622	7.41108	PF4
GO_Cellular_Component_2023	Specific Granule Membrane (GO:0035579)	0.20211	0.377272	4.55423	7.28196	AGPAT2
GO_Cellular_Component_2023	Clathrin-Coated Vesicle Membrane (GO:0030665)	0.20211	0.377272	4.55423	7.28196	TFRC
GO_Cellular_Component_2023	Secretory Granule Lumen (GO:0034774)	0.186903	0.377272	2.60563	4.37006	TIMP2;PF4
GO_Cellular_Component_2023	Intracellular Non-Membrane-Bounded Organelle (GO:0043232)	0.177061	0.377272	1.75163	3.03253	SELENBP1;EPB42;S100A13;CAPG;ANK1
GO_Biological_Process_2023	Heart Development (GO:0007507)	0.349404	0.386449	2.37455	2.4969	COL3A1
GO_Biological_Process_2023	Metal Ion Transport (GO:0030001)	0.349404	0.386449	2.37455	2.4969	CCL5
GO_Biological_Process_2023	Positive Regulation Of Hydrolase Activity (GO:0051345)	0.357566	0.394526	2.30612	2.3717	CCL5
GO_Biological_Process_2023	Negative Regulation Of Cytokine Production (GO:0001818)	0.360803	0.397143	2.27983	2.32412	HOMER3
GO_Molecular_Function_2023	Kinase Binding (GO:0019900)	0.319913	0.397468	1.77329	2.02103	TFRC;PRAM1
GO_Biological_Process_2023	Positive Regulation Of ERK1 And ERK2 Cascade (GO:0070374)	0.362415	0.397963	2.26691	2.30084	CCL5
GO_Cellular_Component_2023	Golgi Lumen (GO:0005796)	0.221927	0.4009	4.09215	6.16035	SOD3
GO_Biological_Process_2023	Macromolecule Biosynthetic Process (GO:0009059)	0.368825	0.404035	2.21664	2.21095	ALAS2
GO_Biological_Process_2023	Phosphate-Containing Compound Metabolic Process (GO:0006796)	0.370417	0.404813	2.20442	2.18926	AGPAT2
GO_Biological_Process_2023	Endocytosis (GO:0006897)	0.378321	0.412469	2.14525	2.08521	STAB1
GO_Biological_Process_2023	Regulation Of Programmed Cell Death (GO:0043067)	0.387677	0.421668	2.07827	1.96933	LGALS1
GO_Biological_Process_2023	Negative Regulation Of Cellular Process (GO:0048523)	0.389925	0.423111	1.51207	1.42407	PLXND1;IGFBP7
GO_Biological_Process_2023	Organic Substance Transport (GO:0071702)	0.396895	0.429658	2.01531	1.86231	CCL5
GO_Biological_Process_2023	Defense Response To Bacterium (GO:0042742)	0.401453	0.433569	1.98522	1.81184	STAB1
GO_Biological_Process_2023	Protein Stabilization (GO:0050821)	0.407478	0.439043	1.94647	1.74748	AHSP
GO_Cellular_Component_2023	Cytoplasmic Vesicle Membrane (GO:0030659)	0.253991	0.444484	2.10627	2.88655	TFRC;STAB1
GO_Molecular_Function_2023	Protein Kinase Binding (GO:0019901)	0.366569	0.448636	1.59144	1.59712	TFRC;PRAM1
GO_Molecular_Function_2023	Metal Ion Binding (GO:0046872)	0.375592	0.452919	1.55997	1.52761	S100A13;AIF1
GO_Cellular_Component_2023	Cytoplasmic Side Of Plasma Membrane (GO:0009898)	0.26754	0.454008	3.2897	4.33741	ANK1
GO_Biological_Process_2023	Positive Regulation Of Protein Modification Process (GO:0031401)	0.432426	0.464833	1.79719	1.50666	TFRC
GO_Cellular_Component_2023	Asymmetric Synapse (GO:0032279)	0.283961	0.465282	3.06401	3.85734	HOMER3
GO_Cellular_Component_2023	Mitotic Spindle (GO:0072686)	0.301783	0.465282	2.8468	3.41059	CAPG
GO_Cellular_Component_2023	Postsynaptic Density (GO:0014069)	0.315727	0.465282	2.69388	3.10571	HOMER3
GO_Cellular_Component_2023	Nucleolus (GO:0005730)	0.303244	0.465282	1.59425	1.90228	SELENBP1;S100A13;CAPG
GO_Cellular_Component_2023	Nuclear Lumen (GO:0031981)	0.309453	0.465282	1.57504	1.84745	SELENBP1;S100A13;CAPG
GO_Biological_Process_2023	Cellular Response To Lipid (GO:0071396)	0.436721	0.467261	1.77317	1.469	PF4
GO_Biological_Process_2023	Cilium Organization (GO:0044782)	0.436721	0.467261	1.77317	1.469	FHDC1
GO_Cellular_Component_2023	Recycling Endosome (GO:0055037)	0.329398	0.472982	2.55645	2.8389	TFRC
GO_Biological_Process_2023	Positive Regulation Of Developmental Process (GO:0051094)	0.443808	0.473739	1.73452	1.40906	TFRC
GO_Biological_Process_2023	Positive Regulation Of GTPase Activity (GO:0043547)	0.445215	0.474138	1.72699	1.39747	CCL5
GO_Biological_Process_2023	Cilium Assembly (GO:0060271)	0.457721	0.486328	1.662	1.29885	FHDC1
GO_Biological_Process_2023	Regulation Of ERK1 And ERK2 Cascade (GO:0070372)	0.459093	0.48666	1.65508	1.28848	CCL5
GO_Biological_Process_2023	Positive Regulation Of Programmed Cell Death (GO:0043068)	0.460462	0.486986	1.64821	1.27823	LGALS1
GO_Biological_Process_2023	Positive Regulation Of DNA-binding Transcription Factor Activity (GO:0051091)	0.461828	0.487308	1.6414	1.26809	TFRC
GO_Molecular_Function_2023	Transcription Regulatory Region Nucleic Acid Binding (GO:0001067)	0.430988	0.512188	1.80534	1.51951	KLF1
GO_Biological_Process_2023	Regulation Of Protein Phosphorylation (GO:0001932)	0.487139	0.512837	1.5218	1.09449	TFRC
GO_Biological_Process_2023	Negative Regulation Of Signal Transduction (GO:0009968)	0.489735	0.514389	1.5102	1.07812	CCL5
GO_Biological_Process_2023	Positive Regulation Of Apoptotic Process (GO:0043065)	0.493604	0.51727	1.49313	1.05419	LGALS1
GO_Cellular_Component_2023	Microtubule (GO:0005874)	0.372006	0.520808	2.19232	2.16787	FHDC1
GO_Molecular_Function_2023	Microtubule Binding (GO:0008017)	0.452197	0.529717	1.69028	1.34147	FHDC1
GO_Biological_Process_2023	Central Nervous System Development (GO:0007417)	0.51004	0.532065	1.42336	0.958299	CAPG
GO_Biological_Process_2023	Positive Regulation Of Cell Differentiation (GO:0045597)	0.51004	0.532065	1.42336	0.958299	PF4
GO_Biological_Process_2023	Transmembrane Receptor Protein Tyrosine Kinase Signaling Pathway (GO:0007169)	0.511283	0.532152	1.41826	0.951414	MMP2
GO_Molecular_Function_2023	G Protein-Coupled Receptor Activity (GO:0004930)	0.467256	0.539648	1.6147	1.22859	LPAR2
GO_Cellular_Component_2023	Spindle (GO:0005819)	0.410468	0.54729	1.92764	1.71649	CAPG
GO_Cellular_Component_2023	Neuron Projection (GO:0043005)	0.407647	0.54729	1.45608	1.30662	HOMER3;ANK1
GO_Biological_Process_2023	Regulation Of Apoptotic Process (GO:0042981)	0.530332	0.55073	1.14077	0.723533	LGALS1;TFRC
GO_Biological_Process_2023	Protein Modification Process (GO:0036211)	0.534949	0.55427	1.13076	0.707385	COL3A1;EPB42
GO_Biological_Process_2023	Positive Regulation Of MAPK Cascade (GO:0043410)	0.542525	0.560854	1.29721	0.793269	CCL5
GO_Biological_Process_2023	Protein Transport (GO:0015031)	0.546002	0.563179	1.28454	0.777316	TFRC
GO_Biological_Process_2023	Organelle Assembly (GO:0070925)	0.556276	0.57249	1.24795	0.73191	FHDC1
GO_Biological_Process_2023	Intracellular Protein Transport (GO:0006886)	0.55965	0.574674	1.23621	0.717547	HOMER3
GO_Molecular_Function_2023	ATP Binding (GO:0005524)	0.50504	0.575184	1.44413	0.986515	EPB42
GO_Biological_Process_2023	Protein-Containing Complex Assembly (GO:0065003)	0.562999	0.576823	1.22468	0.703549	CAPG
GO_Cellular_Component_2023	Vesicle (GO:0031982)	0.446618	0.581642	1.71952	1.38602	TFRC
GO_Cellular_Component_2023	Cilium (GO:0005929)	0.476627	0.606616	1.56999	1.1634	FHDC1
GO_Molecular_Function_2023	Adenyl Ribonucleotide Binding (GO:0032559)	0.541361	0.608104	1.30148	0.798681	EPB42
GO_Molecular_Function_2023	Cadherin Binding (GO:0045296)	0.552877	0.608195	1.25992	0.746651	CAPG
GO_Molecular_Function_2023	Tubulin Binding (GO:0015631)	0.556276	0.608195	1.24795	0.73191	FHDC1
GO_Cellular_Component_2023	Dendrite (GO:0030425)	0.493604	0.614263	1.49313	1.05419	HOMER3
GO_Cellular_Component_2023	Secretory Granule Membrane (GO:0030667)	0.50504	0.614831	1.44413	0.986515	AGPAT2
GO_Biological_Process_2023	Positive Regulation Of DNA-templated Transcription (GO:0045893)	0.608431	0.621982	0.963109	0.478541	LPIN2;PF4;KLF1
GO_Biological_Process_2023	Positive Regulation Of Protein Phosphorylation (GO:0001934)	0.614291	0.626577	1.06242	0.517702	TFRC
GO_Biological_Process_2023	Negative Regulation Of Programmed Cell Death (GO:0043069)	0.618208	0.629174	1.05102	0.505468	TFRC
GO_Biological_Process_2023	Cellular Response To Oxygen-Containing Compound (GO:1901701)	0.641818	0.651757	0.984883	0.436748	PF4
GO_Cellular_Component_2023	Microtubule Cytoskeleton (GO:0015630)	0.5783	0.659963	1.17356	0.642715	FHDC1
GO_Cellular_Component_2023	Mitochondrial Matrix (GO:0005759)	0.592037	0.659963	1.12971	0.592181	ALAS2
GO_Cellular_Component_2023	Endosome Membrane (GO:0010008)	0.598228	0.659963	1.11054	0.570579	TFRC
GO_Cellular_Component_2023	Mitochondrial Inner Membrane (GO:0005743)	0.607343	0.659963	1.08296	0.540031	ALAS2
GO_Cellular_Component_2023	Endoplasmic Reticulum Membrane (GO:0005789)	0.60054	0.659963	0.998696	0.509261	LPIN2;AGPAT2
GO_Cellular_Component_2023	Bounding Membrane Of Organelle (GO:0098588)	0.612823	0.659963	0.975775	0.477817	TFRC;STAB1
GO_Biological_Process_2023	Organelle Organization (GO:0006996)	0.652636	0.66128	0.955954	0.40794	ANK1
GO_Cellular_Component_2023	Organelle Inner Membrane (GO:0019866)	0.634423	0.670333	1.00514	0.457379	ALAS2
GO_Biological_Process_2023	Regulation Of Nucleic Acid-Templated Transcription (GO:1903506)	0.681579	0.689085	0.882348	0.338242	KLF1
GO_Biological_Process_2023	Positive Regulation Of Transcription By RNA Polymerase II (GO:0045944)	0.687007	0.693047	0.846421	0.317755	LPIN2;PF4
GO_Biological_Process_2023	Negative Regulation Of Apoptotic Process (GO:0043066)	0.705144	0.709784	0.826043	0.28858	TFRC
GO_Molecular_Function_2023	Purine Ribonucleoside Triphosphate Binding (GO:0035639)	0.700572	0.746064	0.836735	0.297758	EPB42
GO_Molecular_Function_2023	Transcription Cis-Regulatory Region Binding (GO:0000976)	0.699033	0.746064	0.840359	0.300897	KLF1
GO_Biological_Process_2023	Positive Regulation Of Nucleic Acid-Templated Transcription (GO:1903508)	0.756834	0.760146	0.711863	0.198333	KLF1
GO_Cellular_Component_2023	Mitochondrial Membrane (GO:0031966)	0.745959	0.773587	0.734959	0.215405	ALAS2
GO_Molecular_Function_2023	Cis-Regulatory Region Sequence-Specific DNA Binding (GO:0000987)	0.768398	0.807803	0.716773	0.188832	ZNF552;KLF1
GO_Molecular_Function_2023	RNA Polymerase II Cis-Regulatory Region Sequence-Specific DNA Binding (GO:0000978)	0.778924	0.808504	0.700521	0.175019	ZNF552;KLF1
GO_Molecular_Function_2023	RNA Polymerase II Transcription Regulatory Region Sequence-Specific DNA Binding (GO:0000977)	0.819583	0.840073	0.638014	0.126939	ZNF552;KLF1
GO_Molecular_Function_2023	Sequence-Specific Double-Stranded DNA Binding (GO:1990837)	0.838379	0.848729	0.54982	0.096925	KLF1
GO_Molecular_Function_2023	RNA Binding (GO:0003723)	0.876688	0.876688	0.548291	0.0721571	LGALS1;TFRC
GO_Biological_Process_2023	Regulation Of Transcription By RNA Polymerase II (GO:0006357)	0.894254	0.896207	0.565012	0.0631487	LPIN2;PF4;KLF1
GO_Biological_Process_2023	Regulation Of DNA-templated Transcription (GO:0006355)	0.993642	0.993642	0.191535	0.00122174	KLF1
GO_Cellular_Component_2023	Nucleus (GO:0005634)	0.993341	0.995186	0.38346	0.0025621	S100A13;CAPG;LPIN2;AIF1;KLF1
GO_Cellular_Component_2023	Intracellular Membrane-Bounded Organelle (GO:0043231)	0.995186	0.995186	0.389938	0.00188166	TFRC;S100A13;CAPG;LPIN2;AIF1;KLF1

## Sheet: Mock_d0_v_HBA1(iEPOR)_d14
Gene_set	Term	P-value	Adjusted P-value	Odds Ratio	Combined Score	Genes
GO_Cellular_Component_2023	Azurophil Granule Lumen (GO:0035578)	2.32384e-09	1.2084e-07	39.443	784.128	PRSS57;CTSG;PRTN3;RNASE3;RNASE2;MPO;ELANE		P<0.01
GO_Cellular_Component_2023	Secretory Granule Lumen (GO:0034774)	4.9383e-09	1.28396e-07	16.049	306.957	PRSS57;CTSG;PRTN3;RNASE3;GAS6;RNASE2;MPO;THBS1;ELANE;PF4		P<0.05
GO_Biological_Process_2023	Hydrogen Peroxide Catabolic Process (GO:0042744)	1.198e-09	7.2599e-07	147.667	3033.46	HBM;HBG2;HBE1;HBB;MPO
GO_Cellular_Component_2023	Vacuolar Lumen (GO:0005775)	1.43526e-07	1.86584e-06	20.926	329.726	PRSS57;CTSG;PRTN3;RNASE3;RNASE2;MPO;ELANE
GO_Cellular_Component_2023	Azurophil Granule (GO:0042582)	1.10696e-07	1.86584e-06	21.781	348.854	PRSS57;CTSG;PRTN3;RNASE3;RNASE2;MPO;ELANE
GO_Cellular_Component_2023	Collagen-Containing Extracellular Matrix (GO:0062023)	3.16258e-07	3.28908e-06	11.8114	176.778	GREM1;MMP2;CTSG;PRTN3;IGFBP7;SOD3;THBS1;ELANE;PF4
GO_Biological_Process_2023	One-Carbon Compound Transport (GO:0019755)	1.7088e-06	0.000351978	55.8738	741.988	HBG2;HBE1;HBB;SLC4A1
GO_Biological_Process_2023	Oxygen Transport (GO:0015671)	1.74247e-06	0.000351978	181.851	2411.38	HBG2;HBE1;HBB
GO_Biological_Process_2023	Carbon Dioxide Transport (GO:0015670)	2.39168e-06	0.00036234	159.112	2059.46	HBG2;HBE1;HBB
GO_Biological_Process_2023	Gas Transport (GO:0015669)	6.54897e-06	0.000661446	106.053	1265.87	HBG2;HBE1;HBB
GO_Biological_Process_2023	Positive Regulation Of Smooth Muscle Cell Proliferation (GO:0048661)	5.69404e-06	0.000661446	40.2568	486.145	CCL5;MMP2;THBS1;ELANE
GO_Biological_Process_2023	Regulation Of Smooth Muscle Cell Proliferation (GO:0048660)	9.96677e-06	0.000862838	34.6087	398.563	IGFBP3;CCL5;THBS1;ELANE
GO_Molecular_Function_2023	Protein Tyrosine Kinase Activator Activity (GO:0030296)	5.13131e-05	0.00200272	48.9133	483.144	GREM1;CCL5;GAS6
GO_Molecular_Function_2023	Heme Binding (GO:0020037)	6.60236e-05	0.00200272	20.814	200.345	HBM;HBG2;HBE1;HBB
GO_Molecular_Function_2023	Serine-Type Peptidase Activity (GO:0008236)	2.75458e-05	0.00200272	16.0689	168.718	MMP2;PRSS57;CTSG;PRTN3;ELANE
GO_Biological_Process_2023	Defense Response To Gram-negative Bacterium (GO:0050829)	3.68555e-05	0.0027918	24.3466	248.542	CTSG;RNASE3;RNASE2;ELANE
GO_Molecular_Function_2023	Receptor Ligand Activity (GO:0048018)	0.000138271	0.00314566	8.55518	76.0239	GREM1;CCL5;CLEC11A;CTSG;GAS6;ERFE
GO_Biological_Process_2023	Induction Of Bacterial Agglutination (GO:0043152)	6.09568e-05	0.00410442	277.042	2688.79	RNASE3;RNASE2
GO_Biological_Process_2023	Extracellular Matrix Organization (GO:0030198)	7.6655e-05	0.00464529	12.8519	121.787	GREM1;MMP2;CTSG;GAS6;ELANE
GO_Molecular_Function_2023	Serine-Type Endopeptidase Activity (GO:0004252)	0.000268102	0.00487946	14.2501	117.195	MMP2;CTSG;PRTN3;ELANE
GO_Cellular_Component_2023	Platelet Alpha Granule Lumen (GO:0031093)	0.000602147	0.0052186	20.1489	149.405	GAS6;THBS1;PF4
GO_Biological_Process_2023	Positive Regulation Of Cellular Process (GO:0048522)	0.00010316	0.00529398	6.29417	57.7756	GREM1;HBG2;CCL5;HBE1;CLEC11A;HBB;PRTN3;THBS1
GO_Biological_Process_2023	Antimicrobial Humoral Response (GO:0019730)	0.000113567	0.00529398	17.9837	163.348	CTSG;PRTN3;RNASE3;PF4
GO_Biological_Process_2023	Intracellular Monoatomic Cation Homeostasis (GO:0030003)	0.000109953	0.00529398	11.8709	108.208	ALAS2;TFRC;CCL5;ERFE;ELANE
GO_Biological_Process_2023	Defense Response To Bacterium (GO:0042742)	0.000153392	0.00663967	11.0279	96.8529	CTSG;RNASE3;RNASE2;MPO;ELANE
GO_Biological_Process_2023	Proteolysis (GO:0006508)	0.00016624	0.00665074	8.2601	71.88	KEL;MMP2;PRSS57;CTSG;PRTN3;ELANE
GO_Biological_Process_2023	Positive Regulation Of Cell Population Proliferation (GO:0008284)	0.000186572	0.00665074	6.66005	57.1879	GREM1;CCL5;CLEC11A;PRTN3;GAS6;THBS1;ELANE
GO_Biological_Process_2023	Extracellular Matrix Disassembly (GO:0022617)	0.000181142	0.00665074	30.9948	267.058	MMP2;CTSG;ELANE
GO_Biological_Process_2023	Cellular Component Disassembly (GO:0022411)	0.000206893	0.00696539	29.5502	250.684	MMP2;CTSG;ELANE
GO_Biological_Process_2023	Erythrocyte Differentiation (GO:0030218)	0.000249786	0.00730678	27.6189	229.096	ALAS2;AHSP;KLF1
GO_Biological_Process_2023	Antibacterial Humoral Response (GO:0019731)	0.000249786	0.00730678	27.6189	229.096	CTSG;RNASE3;RNASE2
GO_Biological_Process_2023	Intracellular Iron Ion Homeostasis (GO:0006879)	0.000265263	0.00730678	27.0299	222.585	ALAS2;TFRC;ERFE
GO_Biological_Process_2023	Positive Regulation Of Cell Death (GO:0010942)	0.000265263	0.00730678	27.0299	222.585	HBG2;HBE1;HBB
GO_Biological_Process_2023	Positive Regulation Of Leukocyte Chemotaxis (GO:0002690)	0.000333342	0.00878283	24.9049	199.397	CCL5;GAS6;THBS1
GO_Cellular_Component_2023	Endocytic Vesicle Lumen (GO:0071682)	0.00124779	0.00926932	43.7083	292.25	HBB;MPO
GO_Cellular_Component_2023	Platelet Alpha Granule (GO:0031091)	0.00143529	0.00932941	14.7432	96.5147	GAS6;THBS1;PF4
GO_Biological_Process_2023	Granulocyte Activation (GO:0036230)	0.000397841	0.00964365	83.0833	650.498	CCL5;CTSG
GO_Biological_Process_2023	Myeloid Cell Differentiation (GO:0030099)	0.000391159	0.00964365	23.5177	184.529	ALAS2;AHSP;KLF1
GO_Biological_Process_2023	Regulation Of Cell Death (GO:0010941)	0.000433069	0.0100938	22.6755	175.613	HBG2;HBE1;HBB
GO_Biological_Process_2023	Positive Regulation Of Macrophage Chemotaxis (GO:0010759)	0.000469425	0.010536	75.5265	578.835	CCL5;THBS1
GO_Biological_Process_2023	Regulation Of Cell Population Proliferation (GO:0042127)	0.000575913	0.0124644	4.82272	35.9753	GREM1;TFRC;IGFBP3;CLEC11A;PRTN3;IGFBP7;THBS1;PF4
GO_Biological_Process_2023	Positive Regulation Of Homotypic Cell-Cell Adhesion (GO:0034112)	0.000718739	0.0150192	59.3333	429.455	CCL5;CTSG
GO_Biological_Process_2023	Positive Regulation Of Macrophage Migration (GO:1905523)	0.000913471	0.0178569	51.9115	363.29	CCL5;THBS1
GO_Biological_Process_2023	Neutrophil Activation (GO:0042119)	0.000913471	0.0178569	51.9115	363.29	CCL5;CTSG
GO_Biological_Process_2023	Neutrophil Migration (GO:1990266)	0.000944168	0.0178802	17.1443	119.414	CCL5;PRTN3;PF4
GO_Biological_Process_2023	Regulation Of Granulocyte Chemotaxis (GO:0071622)	0.00101931	0.0181677	48.8554	336.547	CCL5;THBS1
GO_Biological_Process_2023	Regulation Of Smooth Muscle Cell Migration (GO:0014910)	0.00101931	0.0181677	48.8554	336.547	IGFBP3;CCL5
GO_Biological_Process_2023	Regulation Of Macrophage Chemotaxis (GO:0010758)	0.00113076	0.0195334	46.1389	313.046	CCL5;THBS1
GO_Biological_Process_2023	Innate Immune Response In Mucosa (GO:0002227)	0.00124779	0.0195334	43.7083	292.25	RNASE3;RNASE2
GO_Biological_Process_2023	Negative Regulation Of Biomineral Tissue Development (GO:0070168)	0.00124779	0.0195334	43.7083	292.25	GREM1;GAS6
GO_Biological_Process_2023	Macromolecule Catabolic Process (GO:0009057)	0.0012571	0.0195334	15.4655	103.293	RNASE3;RNASE2;ELANE
GO_Biological_Process_2023	Defense Response To Gram-positive Bacterium (GO:0050830)	0.0012571	0.0195334	15.4655	103.293	CTSG;RNASE3;RNASE2
GO_Biological_Process_2023	Regulation Of Mononuclear Cell Migration (GO:0071675)	0.00137038	0.0202549	41.5208	273.733	CCL5;THBS1
GO_Biological_Process_2023	Dendritic Cell Differentiation (GO:0097028)	0.00137038	0.0202549	41.5208	273.733	PRTN3;GAS6
GO_Molecular_Function_2023	Endopeptidase Activity (GO:0004175)	0.00146193	0.0221726	6.60606	43.1244	KEL;MMP2;CTSG;PRTN3;ELANE
GO_Biological_Process_2023	Protein Kinase B Signaling (GO:0043491)	0.00163212	0.0235492	37.7424	242.226	CCL5;GAS6
GO_Biological_Process_2023	Regulation Of Monocyte Chemotaxis (GO:0090025)	0.00177122	0.0249619	36.0996	228.73	GREM1;CCL5
GO_Biological_Process_2023	Cellular Response To Xenobiotic Stimulus (GO:0071466)	0.00191577	0.0263853	34.5938	216.475	TFRC;GAS6
GO_Biological_Process_2023	Peptide Cross-Linking (GO:0018149)	0.00206573	0.0278185	33.2083	205.303	EPB42;THBS1
GO_Biological_Process_2023	Regulation Of Chemotaxis (GO:0050920)	0.00222109	0.0280412	31.9295	195.081	THBS1;ELANE
GO_Biological_Process_2023	Apoptotic Cell Clearance (GO:0043277)	0.00222109	0.0280412	31.9295	195.081	GAS6;THBS1
GO_Biological_Process_2023	Mucosal Immune Response (GO:0002385)	0.00222109	0.0280412	31.9295	195.081	RNASE3;RNASE2
GO_Cellular_Component_2023	Endoplasmic Reticulum Lumen (GO:0005788)	0.00549019	0.028549	6.1087	31.7945	IGFBP3;IGFBP7;GAS6;THBS1
GO_Cellular_Component_2023	Intracellular Organelle Lumen (GO:0070013)	0.00514973	0.028549	3.6625	19.297	ALAS2;IGFBP3;HBB;IGFBP7;GAS6;SOD3;THBS1
GO_Biological_Process_2023	Negative Regulation Of Developmental Process (GO:0051093)	0.00256199	0.0304453	11.9494	71.3018	GREM1;TFRC;GAS6
GO_Biological_Process_2023	Negative Regulation Of Programmed Cell Death (GO:0043069)	0.00256223	0.0304453	5.78428	34.5141	GREM1;TFRC;GAS6;MPO;THBS1
GO_Biological_Process_2023	Positive Regulation Of Phosphate Metabolic Process (GO:0045937)	0.00254788	0.0304453	29.6458	177.06	CCL5;THBS1
GO_Biological_Process_2023	Positive Regulation Of Phosphorylation (GO:0042327)	0.00263389	0.0305161	7.55526	44.8729	TFRC;CCL5;GAS6;THBS1
GO_Biological_Process_2023	Positive Regulation Of Mononuclear Cell Migration (GO:0071677)	0.00271926	0.0305161	28.6221	169.082	CCL5;GAS6
GO_Biological_Process_2023	Negative Regulation Of Chemotaxis (GO:0050922)	0.00271926	0.0305161	28.6221	169.082	THBS1;ELANE
GO_Biological_Process_2023	Platelet Aggregation (GO:0070527)	0.00345738	0.038094	25.1477	142.518	HBB;MYL9
GO_Cellular_Component_2023	Extracellular Membrane-Bounded Organelle (GO:0065010)	0.00895516	0.0388623	15.072	71.0723	PHOSPHO1;TFRC
GO_Cellular_Component_2023	Basolateral Plasma Membrane (GO:0016323)	0.00896823	0.0388623	7.51596	35.4307	TFRC;SLC4A1;ANK1
GO_Biological_Process_2023	Cellular Response To Lipopolysaccharide (GO:0071222)	0.00368675	0.0398959	10.4602	58.6084	CCL5;CTSG;PF4
GO_Biological_Process_2023	Regulation Of Tumor Necrosis Factor Production (GO:0032680)	0.00394245	0.0419144	10.2056	56.4975	GAS6;THBS1;PF4
GO_Biological_Process_2023	Positive Regulation Of Peptidyl-Tyrosine Phosphorylation (GO:0050731)	0.00420872	0.0439738	9.96298	54.5034	GREM1;CCL5;GAS6
GO_Molecular_Function_2023	Protease Binding (GO:0002020)	0.00377082	0.0490206	10.3739	57.8912	CTSG;THBS1;ELANE
GO_Biological_Process_2023	Monocyte Chemotaxis (GO:0002548)	0.00494759	0.0508176	20.7396	110.103	CCL5;CTSG
GO_Biological_Process_2023	Regulation Of Endothelial Cell Apoptotic Process (GO:2000351)	0.00518069	0.052325	20.2327	106.481	GAS6;THBS1
GO_Biological_Process_2023	Nucleobase-Containing Compound Catabolic Process (GO:0034655)	0.00541877	0.0529641	19.75	103.053	RNASE3;RNASE2
GO_Biological_Process_2023	Lymphocyte Chemotaxis (GO:0048247)	0.00541877	0.0529641	19.75	103.053	CCL5;GAS6
GO_Biological_Process_2023	Homotypic Cell-Cell Adhesion (GO:0034109)	0.00590974	0.0559579	18.8504	96.7242	HBB;MYL9
GO_Biological_Process_2023	Response To Glucose (GO:0009749)	0.00590974	0.0559579	18.8504	96.7242	GAS6;THBS1
GO_Molecular_Function_2023	Chemokine Activity (GO:0008009)	0.00590974	0.0599099	18.8504	96.7242	CCL5;PF4
GO_Molecular_Function_2023	Protein Homodimerization Activity (GO:0042803)	0.00592516	0.0599099	4.01067	20.5689	GREM1;TFRC;SMIM1;CCL5;SLC4A1;THBS1
GO_Biological_Process_2023	Negative Regulation Of Cysteine-Type Endopeptidase Activity Involved In Apoptotic Process (GO:0043154)	0.0066829	0.0623052	17.6445	88.3673	GAS6;THBS1
GO_Molecular_Function_2023	Chemokine Receptor Binding (GO:0042379)	0.0069503	0.0632477	17.276	85.8441	CCL5;PF4
GO_Biological_Process_2023	Negative Regulation Of Apoptotic Process (GO:0043066)	0.00691682	0.063509	4.53599	22.5611	GREM1;TFRC;GAS6;MPO;THBS1
GO_Biological_Process_2023	Sprouting Angiogenesis (GO:0002040)	0.00749948	0.065865	16.5833	81.1409	GREM1;THBS1
GO_Biological_Process_2023	Cellular Response To Cytokine Stimulus (GO:0071345)	0.00728236	0.065865	5.61957	27.6612	CCL5;CTSG;GAS6;PF4
GO_Biological_Process_2023	Positive Regulation Of MAPK Cascade (GO:0043410)	0.00744718	0.065865	5.58227	27.3527	CCL5;GAS6;THBS1;ELANE
GO_Biological_Process_2023	Negative Regulation Of Cysteine-Type Endopeptidase Activity (GO:2000117)	0.00778121	0.0673631	16.2574	78.9464	GAS6;THBS1
GO_Biological_Process_2023	Regulation Of Apoptotic Process (GO:0042981)	0.00798188	0.068127	3.75556	18.1415	GREM1;TFRC;IGFBP3;GAS6;MPO;THBS1
GO_Cellular_Component_2023	HFE-transferrin Receptor Complex (GO:1990712)	0.0173717	0.069487	67.8367	274.936	TFRC
GO_Biological_Process_2023	Positive Regulation Of Cellular Metabolic Process (GO:0031325)	0.00865467	0.0728435	15.3519	72.916	CCL5;THBS1
GO_Biological_Process_2023	RNA Catabolic Process (GO:0006401)	0.00895516	0.0733355	15.072	71.0723	RNASE3;RNASE2
GO_Biological_Process_2023	Chemokine-Mediated Signaling Pathway (GO:0070098)	0.00895516	0.0733355	15.072	71.0723	CCL5;PF4
GO_Biological_Process_2023	Regulation Of Phagocytosis (GO:0050764)	0.00926028	0.0748231	14.8021	69.3037	PRTN3;GAS6
GO_Biological_Process_2023	Positive Regulation Of Cellular Biosynthetic Process (GO:0031328)	0.00940226	0.0749707	7.38298	34.4549	CCL5;HBB;THBS1
GO_Biological_Process_2023	Cellular Response To Chemokine (GO:1990869)	0.00957001	0.0753172	14.5417	67.606	CCL5;PF4
GO_Molecular_Function_2023	Nuclease Activity (GO:0004518)	0.00926028	0.0766078	14.8021	69.3037	RNASE3;RNASE2
GO_Biological_Process_2023	Negative Regulation Of Cytokine Production (GO:0001818)	0.00999986	0.0776912	7.21277	33.2161	GAS6;THBS1;ELANE
GO_Biological_Process_2023	Regulation Of T Cell Activation (GO:0050863)	0.0105266	0.0807483	13.8125	62.9001	CCL5;CTSG
GO_Biological_Process_2023	Antimicrobial Humoral Immune Response Mediated By Antimicrobial Peptide (GO:0061844)	0.0115238	0.0837544	13.1528	58.7054	RNASE3;PF4
GO_Biological_Process_2023	Positive Regulation Of T Cell Proliferation (GO:0042102)	0.0115238	0.0837544	13.1528	58.7054	TFRC;CCL5
GO_Biological_Process_2023	B Cell Chemotaxis (GO:0035754)	0.0124388	0.0837544	101.765	446.438	GAS6
GO_Biological_Process_2023	Negative Regulation Of Monocyte Chemotaxis (GO:0090027)	0.0124388	0.0837544	101.765	446.438	GREM1
GO_Biological_Process_2023	Regulation Of Glomerular Filtration (GO:0003093)	0.0124388	0.0837544	101.765	446.438	GAS6
GO_Biological_Process_2023	Regulation Of Long-Chain Fatty Acid Import Across Plasma Membrane (GO:0010746)	0.0124388	0.0837544	101.765	446.438	THBS1
GO_Biological_Process_2023	Ammonium Homeostasis (GO:0097272)	0.0124388	0.0837544	101.765	446.438	RHCE
GO_Biological_Process_2023	Regulation Of Nitric Oxide Mediated Signal Transduction (GO:0010749)	0.0124388	0.0837544	101.765	446.438	THBS1
GO_Biological_Process_2023	Neutrophil Extravasation (GO:0072672)	0.0124388	0.0837544	101.765	446.438	PRTN3
GO_Biological_Process_2023	Regulation Of cGMP-mediated Signaling (GO:0010752)	0.0124388	0.0837544	101.765	446.438	THBS1
GO_Biological_Process_2023	Positive Regulation Of Extrinsic Apoptotic Signaling Pathway Via Death Domain Receptors (GO:1902043)	0.0124388	0.0837544	101.765	446.438	THBS1
GO_Molecular_Function_2023	RNA Nuclease Activity (GO:0004540)	0.0132742	0.0847909	12.1826	52.6524	RNASE3;RNASE2
GO_Molecular_Function_2023	Arylesterase Activity (GO:0004064)	0.0124388	0.0847909	101.765	446.438	CA1
GO_Molecular_Function_2023	Hydrolase Activity, Acting On Acid Anhydrides, In Phosphorus-Containing Anhydrides (GO:0016818)	0.0124388	0.0847909	101.765	446.438	PHOSPHO1
GO_Molecular_Function_2023	Morphogen Activity (GO:0016015)	0.0149083	0.0847909	81.4082	342.39	GREM1
GO_Molecular_Function_2023	Insulin-Like Growth Factor II Binding (GO:0031995)	0.0149083	0.0847909	81.4082	342.39	IGFBP3
GO_Biological_Process_2023	Phagocytosis (GO:0006909)	0.0129154	0.0860079	12.365	53.7798	GAS6;ELANE
GO_Biological_Process_2023	Negative Regulation Of Extrinsic Apoptotic Signaling Pathway (GO:2001237)	0.0132742	0.0864964	12.1826	52.6524	THBS1;PF4
GO_Biological_Process_2023	Neutrophil Chemotaxis (GO:0030593)	0.0132742	0.0864964	12.1826	52.6524	CCL5;PF4
GO_Biological_Process_2023	Negative Regulation Of Cellular Response To Growth Factor Stimulus (GO:0090288)	0.0136374	0.0868694	12.0054	51.5627	GREM1;THBS1
GO_Biological_Process_2023	Granulocyte Chemotaxis (GO:0071621)	0.0143765	0.0868694	11.6661	49.4894	CCL5;PF4
GO_Biological_Process_2023	Positive Regulation Of Lymphocyte Proliferation (GO:0050671)	0.0147525	0.0868694	11.5035	48.5026	TFRC;CCL5
GO_Biological_Process_2023	Negative Regulation Of Plasminogen Activation (GO:0010757)	0.0149083	0.0868694	81.4082	342.39	THBS1
GO_Biological_Process_2023	Regulation Of Natural Killer Cell Chemotaxis (GO:2000501)	0.0149083	0.0868694	81.4082	342.39	CCL5
GO_Biological_Process_2023	Regulation Of Transforming Growth Factor Beta1 Production (GO:0032908)	0.0149083	0.0868694	81.4082	342.39	THBS1
GO_Biological_Process_2023	Receptor-Mediated Virion Attachment To Host Cell (GO:0046813)	0.0149083	0.0868694	81.4082	342.39	GAS6
GO_Biological_Process_2023	Positive Regulation Of Activation Of Janus Kinase Activity (GO:0010536)	0.0149083	0.0868694	81.4082	342.39	CCL5
GO_Biological_Process_2023	Negative Regulation Of Blood Vessel Endothelial Cell Proliferation Involved In Sprouting Angiogenesis (GO:1903588)	0.0149083	0.0868694	81.4082	342.39	THBS1
GO_Biological_Process_2023	Negative Regulation Of Dendritic Cell Apoptotic Process (GO:2000669)	0.0149083	0.0868694	81.4082	342.39	GAS6
GO_Biological_Process_2023	Negative Regulation Of Cell Population Proliferation (GO:0008285)	0.0147316	0.0868694	4.53913	19.145	GREM1;IGFBP3;IGFBP7;THBS1
GO_Cellular_Component_2023	Golgi Lumen (GO:0005796)	0.025949	0.0899564	8.44048	30.8214	GAS6;SOD3
GO_Cellular_Component_2023	Primary Lysosome (GO:0005766)	0.0247259	0.0899564	45.2177	167.301	MPO
GO_Biological_Process_2023	Regulation Of T Cell Proliferation (GO:0042129)	0.0159058	0.0899767	11.0417	45.7243	TFRC;CCL5
GO_Biological_Process_2023	Negative Regulation Of Blood Vessel Morphogenesis (GO:2000181)	0.0159058	0.0899767	11.0417	45.7243	THBS1;PF4
GO_Biological_Process_2023	Positive Regulation Of Tumor Necrosis Factor Production (GO:0032760)	0.0162986	0.0899767	10.8958	44.8546	THBS1;PF4
GO_Biological_Process_2023	Negative Regulation Of Glial Cell Apoptotic Process (GO:0034351)	0.0173717	0.0899767	67.8367	274.936	GAS6
GO_Biological_Process_2023	Regulation Of Dendritic Cell Chemotaxis (GO:2000508)	0.0173717	0.0899767	67.8367	274.936	GAS6
GO_Biological_Process_2023	Negative Regulation Of Leukocyte Proliferation (GO:0070664)	0.0173717	0.0899767	67.8367	274.936	GREM1
GO_Biological_Process_2023	Negative Regulation Of Mitochondrial Fusion (GO:0010637)	0.0173717	0.0899767	67.8367	274.936	TFRC
GO_Biological_Process_2023	Negative Regulation Of Osteoblast Proliferation (GO:0033689)	0.0173717	0.0899767	67.8367	274.936	GREM1
GO_Biological_Process_2023	Cellular Response To Interferon-Alpha (GO:0035457)	0.0173717	0.0899767	67.8367	274.936	GAS6
GO_Biological_Process_2023	Negative Regulation Of T Cell Apoptotic Process (GO:0070233)	0.0173717	0.0899767	67.8367	274.936	CCL5
GO_Biological_Process_2023	Regulation Of Activation Of Janus Kinase Activity (GO:0010533)	0.0173717	0.0899767	67.8367	274.936	CCL5
GO_Biological_Process_2023	Positive Regulation Of Dendritic Cell Chemotaxis (GO:2000510)	0.0173717	0.0899767	67.8367	274.936	GAS6
GO_Biological_Process_2023	Positive Regulation Of Fibroblast Migration (GO:0010763)	0.0173717	0.0899767	67.8367	274.936	THBS1
GO_Biological_Process_2023	Positive Regulation Of Tumor Necrosis Factor Superfamily Cytokine Production (GO:1903557)	0.0179109	0.09121	10.349	41.6271	THBS1;PF4
GO_Biological_Process_2023	Regulation Of Phosphorylation (GO:0042325)	0.0179109	0.09121	10.349	41.6271	CCL5;THBS1
GO_Biological_Process_2023	Regulation Of Cysteine-Type Endopeptidase Activity Involved In Apoptotic Process (GO:0043281)	0.0187414	0.0938787	10.0955	40.1501	GAS6;THBS1
GO_Biological_Process_2023	Regulation Of Osteoblast Differentiation (GO:0045667)	0.0191628	0.0938787	9.97339	39.4426	GREM1;HEMGN
GO_Biological_Process_2023	Exocytosis (GO:0006887)	0.0195881	0.0938787	9.85417	38.7548	CCL5;ANK1
GO_Biological_Process_2023	Negative Regulation Of Angiogenesis (GO:0016525)	0.0195881	0.0938787	9.85417	38.7548	THBS1;PF4
GO_Biological_Process_2023	Regulation Of Dendritic Cell Antigen Processing And Presentation (GO:0002604)	0.0198292	0.0938787	58.1429	227.955	THBS1
GO_Biological_Process_2023	Regulation Of Fibroblast Apoptotic Process (GO:2000269)	0.0198292	0.0938787	58.1429	227.955	GAS6
GO_Biological_Process_2023	Angiotensin Maturation (GO:0002003)	0.0198292	0.0938787	58.1429	227.955	CTSG
GO_Biological_Process_2023	Response To Magnesium Ion (GO:0032026)	0.0198292	0.0938787	58.1429	227.955	THBS1
GO_Biological_Process_2023	Regulation Of Angiotensin Levels In Blood (GO:0002002)	0.0198292	0.0938787	58.1429	227.955	CTSG
GO_Biological_Process_2023	Positive Regulation Of Peptidyl-Serine Phosphorylation (GO:0033138)	0.0208877	0.0978407	9.51293	36.8017	TFRC;GAS6
GO_Biological_Process_2023	Inflammatory Response (GO:0006954)	0.0211646	0.0978407	5.40142	20.8248	CCL5;THBS1;PF4
GO_Biological_Process_2023	Regulation Of Dendritic Cell Apoptotic Process (GO:2000668)	0.0222806	0.0978407	50.8724	193.521	GAS6
GO_Biological_Process_2023	Negative Regulation Of Lymphocyte Apoptotic Process (GO:0070229)	0.0222806	0.0978407	50.8724	193.521	CCL5
GO_Biological_Process_2023	Transferrin Transport (GO:0033572)	0.0222806	0.0978407	50.8724	193.521	TFRC
GO_Biological_Process_2023	Vasoconstriction (GO:0042310)	0.0222806	0.0978407	50.8724	193.521	KEL
GO_Biological_Process_2023	Positive Regulation Of T Cell Apoptotic Process (GO:0070234)	0.0222806	0.0978407	50.8724	193.521	CCL5
GO_Biological_Process_2023	Sequestering Of Extracellular Ligand From Receptor (GO:0035581)	0.0222806	0.0978407	50.8724	193.521	GREM1
GO_Biological_Process_2023	Regulation Of Cell-Cell Adhesion Mediated By Integrin (GO:0033632)	0.0222806	0.0978407	50.8724	193.521	CCL5
GO_Biological_Process_2023	Positive Regulation Of MAP Kinase Activity (GO:0043406)	0.0217736	0.0978407	9.29822	35.5848	THBS1;ELANE
GO_Molecular_Function_2023	Phosphatase Activity (GO:0016791)	0.0183241	0.0980881	10.2207	40.878	PHOSPHO1;PLPPR3
GO_Biological_Process_2023	Positive Regulation Of Protein Kinase B Signaling (GO:0051897)	0.022675	0.0981503	9.09295	34.4304	GAS6;THBS1
GO_Biological_Process_2023	Regulation Of Peptidyl-Serine Phosphorylation (GO:0033135)	0.022675	0.0981503	9.09295	34.4304	TFRC;GAS6
GO_Molecular_Function_2023	Protein Phosphatase Activator Activity (GO:0072542)	0.0368633	0.0992732	29.0612	95.9177	IGFBP3
GO_Molecular_Function_2023	BMP Binding (GO:0036122)	0.0368633	0.0992732	29.0612	95.9177	GREM1
GO_Molecular_Function_2023	Insulin-Like Growth Factor Binding (GO:0005520)	0.0368633	0.0992732	29.0612	95.9177	IGFBP3
GO_Molecular_Function_2023	Low-Density Lipoprotein Particle Binding (GO:0030169)	0.0392729	0.0992732	27.1224	87.8013	THBS1
GO_Molecular_Function_2023	CXCR Chemokine Receptor Binding (GO:0045236)	0.0392729	0.0992732	27.1224	87.8013	PF4
GO_Molecular_Function_2023	Metalloendopeptidase Activity (GO:0004222)	0.0264315	0.0992732	8.3548	30.3546	KEL;MMP2
GO_Molecular_Function_2023	Vascular Endothelial Growth Factor Receptor 2 Binding (GO:0043184)	0.0198292	0.0992732	58.1429	227.955	GREM1
GO_Molecular_Function_2023	Metallopeptidase Activity (GO:0008237)	0.0384971	0.0992732	6.77186	22.0571	KEL;MMP2
GO_Molecular_Function_2023	Ammonium Transmembrane Transporter Activity (GO:0008519)	0.0247259	0.0992732	45.2177	167.301	RHCE
GO_Molecular_Function_2023	Phospholipase Activator Activity (GO:0016004)	0.0247259	0.0992732	45.2177	167.301	CCL5
GO_Molecular_Function_2023	Lipase Activator Activity (GO:0060229)	0.0295988	0.0992732	36.9926	130.215	CCL5
GO_Molecular_Function_2023	Transmembrane Receptor Protein Tyrosine Kinase Activator Activity (GO:0030297)	0.0295988	0.0992732	36.9926	130.215	GREM1
GO_Molecular_Function_2023	Insulin-Like Growth Factor I Binding (GO:0031994)	0.0295988	0.0992732	36.9926	130.215	IGFBP3
GO_Molecular_Function_2023	Vascular Endothelial Growth Factor Receptor Binding (GO:0005172)	0.0295988	0.0992732	36.9926	130.215	GREM1
GO_Molecular_Function_2023	Caspase Binding (GO:0089720)	0.0320262	0.0992732	33.9082	116.685	CTSG
GO_Molecular_Function_2023	Lipid Phosphatase Activity (GO:0042577)	0.0320262	0.0992732	33.9082	116.685	PLPPR3
GO_Molecular_Function_2023	Phosphatidate Phosphatase Activity (GO:0008195)	0.0320262	0.0992732	33.9082	116.685	PLPPR3
GO_Molecular_Function_2023	1-Phosphatidylinositol-3-Kinase Regulator Activity (GO:0046935)	0.0344477	0.0992732	31.2983	105.422	CISH
GO_Molecular_Function_2023	Solute:Inorganic Anion Antiporter Activity (GO:0005452)	0.0344477	0.0992732	31.2983	105.422	SLC4A1
GO_Biological_Process_2023	Calcium Ion Homeostasis (GO:0055074)	0.0269177	0.100379	8.27083	29.8988	CCL5;ELANE
GO_Biological_Process_2023	Cytokine-Mediated Signaling Pathway (GO:0019221)	0.026386	0.100379	4.94957	17.9913	CCL5;CTSG;PF4
GO_Biological_Process_2023	Positive Regulation Of Macrophage Differentiation (GO:0045651)	0.0247259	0.100379	45.2177	167.301	PF4
GO_Biological_Process_2023	Negative Regulation Of Pathway-Restricted SMAD Protein Phosphorylation (GO:0060394)	0.0247259	0.100379	45.2177	167.301	GREM1
GO_Biological_Process_2023	Negative Regulation Of Sprouting Angiogenesis (GO:1903671)	0.0247259	0.100379	45.2177	167.301	THBS1
GO_Biological_Process_2023	Ammonium Transmembrane Transport (GO:0072488)	0.0247259	0.100379	45.2177	167.301	RHCE
GO_Biological_Process_2023	Negative Regulation Of Transmembrane Transport (GO:0034763)	0.0247259	0.100379	45.2177	167.301	THBS1
GO_Biological_Process_2023	Positive Regulation Of Transforming Growth Factor Beta Production (GO:0071636)	0.0247259	0.100379	45.2177	167.301	THBS1
GO_Biological_Process_2023	Cellular Response To UV-A (GO:0071492)	0.0247259	0.100379	45.2177	167.301	MMP2
GO_Biological_Process_2023	Removal Of Superoxide Radicals (GO:0019430)	0.0247259	0.100379	45.2177	167.301	SOD3
GO_Biological_Process_2023	Engulfment Of Apoptotic Cell (GO:0043652)	0.0247259	0.100379	45.2177	167.301	THBS1
GO_Biological_Process_2023	Erythrocyte Development (GO:0048821)	0.0271653	0.100379	40.6939	146.735	ALAS2
GO_Biological_Process_2023	Positive Regulation Of Hemostasis (GO:1900048)	0.0271653	0.100379	40.6939	146.735	THBS1
GO_Biological_Process_2023	Negative Regulation Of Fibrinolysis (GO:0051918)	0.0271653	0.100379	40.6939	146.735	THBS1
GO_Biological_Process_2023	Negative Regulation Of Leukocyte Apoptotic Process (GO:2000107)	0.0271653	0.100379	40.6939	146.735	GAS6
GO_Biological_Process_2023	Negative Regulation Of Leukocyte Chemotaxis (GO:0002689)	0.0271653	0.100379	40.6939	146.735	GREM1
GO_Biological_Process_2023	Regulation Of Homotypic Cell-Cell Adhesion (GO:0034110)	0.0271653	0.100379	40.6939	146.735	CCL5
GO_Biological_Process_2023	Regulation Of Mitochondrial Fusion (GO:0010635)	0.0271653	0.100379	40.6939	146.735	TFRC
GO_Biological_Process_2023	Regulation Of Muscle System Process (GO:0090257)	0.0271653	0.100379	40.6939	146.735	MYL9
GO_Biological_Process_2023	Macrophage Chemotaxis (GO:0048246)	0.0271653	0.100379	40.6939	146.735	CCL5
GO_Biological_Process_2023	Regulation Of Stress-Activated Protein Kinase Signaling Cascade (GO:0070302)	0.0271653	0.100379	40.6939	146.735	GREM1
GO_Biological_Process_2023	Cellular Response To Superoxide (GO:0071451)	0.0271653	0.100379	40.6939	146.735	SOD3
GO_Biological_Process_2023	Negative Regulation Of Bone Remodeling (GO:0046851)	0.0271653	0.100379	40.6939	146.735	GREM1
GO_Biological_Process_2023	Positive Regulation Of Coagulation (GO:0050820)	0.0271653	0.100379	40.6939	146.735	THBS1
GO_Biological_Process_2023	Positive Regulation Of T Cell Activation (GO:0050870)	0.0294028	0.101083	7.875	27.7725	TFRC;CCL5
GO_Biological_Process_2023	Positive Regulation Of Translation (GO:0045727)	0.0299105	0.101083	7.80031	27.3756	CCL5;THBS1
GO_Biological_Process_2023	RNA Metabolic Process (GO:0016070)	0.0314545	0.101083	7.58448	26.2363	RNASE3;RNASE2
GO_Biological_Process_2023	Calcium Ion Transport (GO:0006816)	0.0319761	0.101083	7.51515	25.8729	CCL5;GAS6
GO_Biological_Process_2023	Regulation Of Protein Phosphorylation (GO:0001932)	0.0285412	0.101083	4.79649	17.0583	TFRC;IGFBP3;GAS6
GO_Biological_Process_2023	Negative Regulation Of Signal Transduction (GO:0009968)	0.0290943	0.101083	4.75967	16.836	IGFBP3;CCL5;THBS1
GO_Biological_Process_2023	Positive Regulation Of Insulin Receptor Signaling Pathway (GO:0046628)	0.0295988	0.101083	36.9926	130.215	ERFE
GO_Biological_Process_2023	Negative Regulation Of Locomotion (GO:0040013)	0.0295988	0.101083	36.9926	130.215	ELANE
GO_Biological_Process_2023	Negative Regulation Of Mononuclear Cell Migration (GO:0071676)	0.0295988	0.101083	36.9926	130.215	GREM1
GO_Biological_Process_2023	Positive Regulation Of Protein Export From Nucleus (GO:0046827)	0.0295988	0.101083	36.9926	130.215	GAS6
GO_Biological_Process_2023	Low-Density Lipoprotein Particle Remodeling (GO:0034374)	0.0295988	0.101083	36.9926	130.215	MPO
GO_Biological_Process_2023	Macrophage Migration (GO:1905517)	0.0295988	0.101083	36.9926	130.215	CCL5
GO_Biological_Process_2023	Cell-Cell Junction Maintenance (GO:0045217)	0.0295988	0.101083	36.9926	130.215	PRTN3
GO_Biological_Process_2023	Positive Regulation Of T Cell Chemotaxis (GO:0010820)	0.0295988	0.101083	36.9926	130.215	CCL5
GO_Biological_Process_2023	Negative Regulation By Host Of Viral Transcription (GO:0043922)	0.0295988	0.101083	36.9926	130.215	CCL5
GO_Biological_Process_2023	Positive Regulation Of Gene Expression (GO:0010628)	0.0316856	0.101083	3.55754	12.2803	TFRC;GAS6;THBS1;PF4
GO_Biological_Process_2023	Negative Regulation Of Fibroblast Growth Factor Receptor Signaling Pathway (GO:0040037)	0.0320262	0.101083	33.9082	116.685	THBS1
GO_Biological_Process_2023	Negative Regulation Of Interleukin-12 Production (GO:0032695)	0.0320262	0.101083	33.9082	116.685	THBS1
GO_Biological_Process_2023	Killing By Host Of Symbiont Cells (GO:0051873)	0.0320262	0.101083	33.9082	116.685	PF4
GO_Biological_Process_2023	Cardiocyte Differentiation (GO:0035051)	0.0320262	0.101083	33.9082	116.685	GREM1
GO_Biological_Process_2023	Response To UV-A (GO:0070141)	0.0320262	0.101083	33.9082	116.685	MMP2
GO_Biological_Process_2023	Regulation Of T Cell Chemotaxis (GO:0010819)	0.0320262	0.101083	33.9082	116.685	CCL5
GO_Biological_Process_2023	Response To Progesterone (GO:0032570)	0.0320262	0.101083	33.9082	116.685	THBS1
GO_Biological_Process_2023	Positive Regulation Of Cellular Response To Insulin Stimulus (GO:1900078)	0.0320262	0.101083	33.9082	116.685	ERFE
GO_Biological_Process_2023	Negative Regulation Of Bone Mineralization (GO:0030502)	0.0320262	0.101083	33.9082	116.685	GREM1
GO_Biological_Process_2023	Negative Regulation Of Cartilage Development (GO:0061037)	0.0320262	0.101083	33.9082	116.685	GREM1
GO_Biological_Process_2023	Negative Regulation Of Cell Migration Involved In Sprouting Angiogenesis (GO:0090051)	0.0320262	0.101083	33.9082	116.685	THBS1
GO_Biological_Process_2023	Protein Modification Process (GO:0036211)	0.0318048	0.101083	3.02864	10.4432	EPB42;IGFBP3;CTSG;GAS6;THBS1
GO_Biological_Process_2023	Regulation Of MAP Kinase Activity (GO:0043405)	0.0330295	0.102385	7.38021	25.1691	THBS1;ELANE
GO_Biological_Process_2023	Positive Regulation Of Protein Serine/Threonine Kinase Activity (GO:0071902)	0.0346351	0.102385	7.18659	24.1677	THBS1;ELANE
GO_Biological_Process_2023	Protein Maturation (GO:0051604)	0.0346351	0.102385	7.18659	24.1677	KEL;CTSG
GO_Biological_Process_2023	Protein Processing (GO:0016485)	0.0346351	0.102385	7.18659	24.1677	KEL;CTSG
GO_Biological_Process_2023	Cellular Response To Molecule Of Bacterial Origin (GO:0071219)	0.0346351	0.102385	7.18659	24.1677	CTSG;PF4
GO_Biological_Process_2023	Striated Muscle Cell Development (GO:0055002)	0.0344477	0.102385	31.2983	105.422	MYL9
GO_Biological_Process_2023	Regulation Of Endothelial Cell Chemotaxis (GO:2001026)	0.0344477	0.102385	31.2983	105.422	THBS1
GO_Biological_Process_2023	Negative Regulation Of Smooth Muscle Cell Migration (GO:0014912)	0.0344477	0.102385	31.2983	105.422	IGFBP3
GO_Biological_Process_2023	Regulation Of Macrophage Differentiation (GO:0045649)	0.0344477	0.102385	31.2983	105.422	PF4
GO_Biological_Process_2023	Positive Regulation Of Response To Cytokine Stimulus (GO:0060760)	0.0344477	0.102385	31.2983	105.422	GAS6
GO_Biological_Process_2023	Regulation Of MHC Class II Biosynthetic Process (GO:0045346)	0.0344477	0.102385	31.2983	105.422	PF4
GO_Biological_Process_2023	Regulation Of Bone Remodeling (GO:0046850)	0.0344477	0.102385	31.2983	105.422	GREM1
GO_Biological_Process_2023	Negative Regulation Of Chondrocyte Differentiation (GO:0032331)	0.0344477	0.102385	31.2983	105.422	GREM1
GO_Molecular_Function_2023	Phosphatidylinositol 3-Kinase Regulator Activity (GO:0035014)	0.0416767	0.102502	25.426	80.7992	CISH
GO_Biological_Process_2023	Negative Regulation Of Focal Adhesion Assembly (GO:0051895)	0.0368633	0.103422	29.0612	95.9177	THBS1
GO_Biological_Process_2023	Positive Regulation Of Immunoglobulin Mediated Immune Response (GO:0002891)	0.0368633	0.103422	29.0612	95.9177	TFRC
GO_Biological_Process_2023	Negative Regulation Of Gluconeogenesis (GO:0045721)	0.0368633	0.103422	29.0612	95.9177	ERFE
GO_Biological_Process_2023	Positive Regulation Of Isotype Switching (GO:0045830)	0.0368633	0.103422	29.0612	95.9177	TFRC
GO_Biological_Process_2023	Negative Regulation Of Phagocytosis (GO:0050765)	0.0368633	0.103422	29.0612	95.9177	PRTN3
GO_Biological_Process_2023	Regulation Of Isotype Switching (GO:0045191)	0.0368633	0.103422	29.0612	95.9177	TFRC
GO_Biological_Process_2023	Negative Regulation Of Protein Processing (GO:0010955)	0.0368633	0.103422	29.0612	95.9177	THBS1
GO_Biological_Process_2023	Defense Response To Protozoan (GO:0042832)	0.0368633	0.103422	29.0612	95.9177	PF4
GO_Biological_Process_2023	Dendritic Cell Chemotaxis (GO:0002407)	0.0368633	0.103422	29.0612	95.9177	CCL5
GO_Biological_Process_2023	Negative Regulation Of Cell-Substrate Junction Organization (GO:0150118)	0.0368633	0.103422	29.0612	95.9177	THBS1
GO_Biological_Process_2023	Positive Regulation Of Endothelial Cell Apoptotic Process (GO:2000353)	0.0368633	0.103422	29.0612	95.9177	THBS1
GO_Molecular_Function_2023	Ankyrin Binding (GO:0030506)	0.0440745	0.105547	23.9292	74.7039	SLC4A1
GO_Biological_Process_2023	Positive Regulation Of Lymphocyte Migration (GO:2000403)	0.0392729	0.106247	27.1224	87.8013	CCL5
GO_Biological_Process_2023	Regulation Of Fibrinolysis (GO:0051917)	0.0392729	0.106247	27.1224	87.8013	THBS1
GO_Biological_Process_2023	Regulation Of Interleukin-1 Production (GO:0032652)	0.0392729	0.106247	27.1224	87.8013	GAS6
GO_Biological_Process_2023	Positive Regulation Of Smooth Muscle Cell Migration (GO:0014911)	0.0392729	0.106247	27.1224	87.8013	CCL5
GO_Biological_Process_2023	Regulation Of Osteoblast Proliferation (GO:0033688)	0.0392729	0.106247	27.1224	87.8013	GREM1
GO_Biological_Process_2023	Regulation Of Plasminogen Activation (GO:0010755)	0.0392729	0.106247	27.1224	87.8013	THBS1
GO_Biological_Process_2023	Regulation Of Blood Vessel Endothelial Cell Proliferation Involved In Sprouting Angiogenesis (GO:1903587)	0.0392729	0.106247	27.1224	87.8013	THBS1
GO_Biological_Process_2023	Negative Regulation Of Chemokine Production (GO:0032682)	0.0392729	0.106247	27.1224	87.8013	ELANE
GO_Molecular_Function_2023	Cysteine-Type Endopeptidase Inhibitor Activity Involved In Apoptotic Process (GO:0043027)	0.0464665	0.108422	22.5986	69.3558	GAS6
GO_Molecular_Function_2023	Phosphatidylinositol Phospholipase C Activity (GO:0004435)	0.0488525	0.108429	21.4082	64.6301	CCL5
GO_Molecular_Function_2023	Fibroblast Growth Factor Binding (GO:0017134)	0.0488525	0.108429	21.4082	64.6301	THBS1
GO_Biological_Process_2023	Extracellular Matrix Assembly (GO:0085029)	0.0416767	0.108862	25.426	80.7992	GAS6
GO_Biological_Process_2023	Negative Regulation Of Interleukin-8 Production (GO:0032717)	0.0416767	0.108862	25.426	80.7992	ELANE
GO_Biological_Process_2023	Positive Regulation Of Lymphocyte Chemotaxis (GO:0140131)	0.0416767	0.108862	25.426	80.7992	CCL5
GO_Biological_Process_2023	Positive Regulation Of Macrophage Activation (GO:0043032)	0.0416767	0.108862	25.426	80.7992	THBS1
GO_Biological_Process_2023	Positive Regulation Of Macrophage Derived Foam Cell Differentiation (GO:0010744)	0.0416767	0.108862	25.426	80.7992	PF4
GO_Biological_Process_2023	Cell Migration Involved In Sprouting Angiogenesis (GO:0002042)	0.0416767	0.108862	25.426	80.7992	GREM1
GO_Biological_Process_2023	Response To Interferon-Alpha (GO:0035455)	0.0416767	0.108862	25.426	80.7992	GAS6
GO_Biological_Process_2023	Positive Regulation Of Cell Adhesion Mediated By Integrin (GO:0033630)	0.0416767	0.108862	25.426	80.7992	CCL5
GO_Biological_Process_2023	Positive Regulation Of Intracellular Signal Transduction (GO:1902533)	0.0418641	0.108883	3.24276	10.2903	TFRC;CCL5;GAS6;THBS1
GO_Molecular_Function_2023	Transforming Growth Factor Beta Binding (GO:0050431)	0.0512328	0.111004	20.3367	60.4281	THBS1
GO_Cellular_Component_2023	Muscle Myosin Complex (GO:0005859)	0.0344477	0.111955	31.2983	105.422	MYL9
GO_Biological_Process_2023	Positive Regulation Of Monocyte Chemotaxis (GO:0090026)	0.0440745	0.112223	23.9292	74.7039	CCL5
GO_Biological_Process_2023	Positive Regulation Of Natural Killer Cell Activation (GO:0032816)	0.0440745	0.112223	23.9292	74.7039	GAS6
GO_Biological_Process_2023	Cell Junction Maintenance (GO:0034331)	0.0440745	0.112223	23.9292	74.7039	PRTN3
GO_Biological_Process_2023	Renal Absorption (GO:0070293)	0.0440745	0.112223	23.9292	74.7039	HBB
GO_Biological_Process_2023	Dendritic Cell Migration (GO:0036336)	0.0440745	0.112223	23.9292	74.7039	CCL5
GO_Molecular_Function_2023	Bicarbonate Transmembrane Transporter Activity (GO:0015106)	0.0536072	0.113195	19.3673	56.6702	SLC4A1
GO_Molecular_Function_2023	Lipoprotein Particle Binding (GO:0071813)	0.0559758	0.113195	18.4861	53.2924	THBS1
GO_Molecular_Function_2023	Phospholipase C Activity (GO:0004629)	0.0559758	0.113195	18.4861	53.2924	CCL5
GO_Biological_Process_2023	Negative Regulation Of Leukocyte Cell-Cell Adhesion (GO:1903038)	0.0464665	0.114466	22.5986	69.3558	CTSG
GO_Biological_Process_2023	Regulation Of Fibroblast Growth Factor Receptor Signaling Pathway (GO:0040036)	0.0464665	0.114466	22.5986	69.3558	THBS1
GO_Biological_Process_2023	Regulation Of Insulin-Like Growth Factor Receptor Signaling Pathway (GO:0043567)	0.0464665	0.114466	22.5986	69.3558	IGFBP3
GO_Biological_Process_2023	Heme Biosynthetic Process (GO:0006783)	0.0464665	0.114466	22.5986	69.3558	ALAS2
GO_Biological_Process_2023	Regulation Of Megakaryocyte Differentiation (GO:0045652)	0.0464665	0.114466	22.5986	69.3558	PF4
GO_Biological_Process_2023	Bicarbonate Transport (GO:0015701)	0.0464665	0.114466	22.5986	69.3558	SLC4A1
GO_Biological_Process_2023	Regulation Of Protein Kinase B Signaling (GO:0051896)	0.0454787	0.114466	6.16169	19.0428	GAS6;THBS1
GO_Biological_Process_2023	Protein Localization To Plasma Membrane (GO:0072659)	0.0460803	0.114466	6.11574	18.8204	GAS6;ANK1
GO_Molecular_Function_2023	Monoatomic Anion Transmembrane Transporter Activity (GO:0008509)	0.0583386	0.115409	17.6815	50.2417	SLC4A1
GO_Biological_Process_2023	Striated Muscle Cell Differentiation (GO:0051146)	0.0488525	0.115643	21.4082	64.6301	GREM1
GO_Biological_Process_2023	Positive Regulation Of Leukocyte Activation (GO:0002696)	0.0488525	0.115643	21.4082	64.6301	THBS1
GO_Biological_Process_2023	Regulation Of Fibroblast Migration (GO:0010762)	0.0488525	0.115643	21.4082	64.6301	THBS1
GO_Biological_Process_2023	Positive Regulation Of Phospholipase Activity (GO:0010518)	0.0488525	0.115643	21.4082	64.6301	CCL5
GO_Biological_Process_2023	Intracellular Monoatomic Ion Homeostasis (GO:0006873)	0.0488525	0.115643	21.4082	64.6301	SLC4A1
GO_Biological_Process_2023	Positive Regulation Of Vascular Associated Smooth Muscle Cell Proliferation (GO:1904707)	0.0488525	0.115643	21.4082	64.6301	MMP2
GO_Biological_Process_2023	Lipopolysaccharide-Mediated Signaling Pathway (GO:0031663)	0.0488525	0.115643	21.4082	64.6301	CCL5
GO_Biological_Process_2023	Response To Fibroblast Growth Factor (GO:0071774)	0.0488525	0.115643	21.4082	64.6301	CCL5
GO_Biological_Process_2023	Response To Ketone (GO:1901654)	0.0488525	0.115643	21.4082	64.6301	THBS1
GO_Biological_Process_2023	Intracellular Calcium Ion Homeostasis (GO:0006874)	0.0472923	0.115643	6.02585	18.3873	CCL5;ELANE
GO_Biological_Process_2023	Protein Localization To Cell Periphery (GO:1990778)	0.0491322	0.115853	5.89583	17.7656	GAS6;ANK1
GO_Biological_Process_2023	Negative Regulation Of Tumor Necrosis Factor-Mediated Signaling Pathway (GO:0010804)	0.0512328	0.1185	20.3367	60.4281	GAS6
GO_Biological_Process_2023	Positive Regulation Of Translational Initiation (GO:0045948)	0.0512328	0.1185	20.3367	60.4281	CCL5
GO_Biological_Process_2023	Porphyrin-Containing Compound Biosynthetic Process (GO:0006779)	0.0512328	0.1185	20.3367	60.4281	ALAS2
GO_Biological_Process_2023	Positive Regulation Of Blood Coagulation (GO:0030194)	0.0512328	0.1185	20.3367	60.4281	THBS1
GO_Biological_Process_2023	Positive Regulation Of Protein Kinase Activity (GO:0045860)	0.050998	0.1185	5.77127	17.1751	CCL5;GAS6
GO_Biological_Process_2023	Negative Regulation Of Extrinsic Apoptotic Signaling Pathway In Absence Of Ligand (GO:2001240)	0.0536072	0.118996	19.3673	56.6702	PF4
GO_Biological_Process_2023	Negative Regulation Of Myeloid Cell Differentiation (GO:0045638)	0.0536072	0.118996	19.3673	56.6702	PF4
GO_Biological_Process_2023	Positive Regulation Of Protein Autophosphorylation (GO:0031954)	0.0536072	0.118996	19.3673	56.6702	GREM1
GO_Biological_Process_2023	Negative Regulation Of Signal Transduction In Absence Of Ligand (GO:1901099)	0.0536072	0.118996	19.3673	56.6702	PF4
GO_Biological_Process_2023	Positive Regulation Of Receptor Internalization (GO:0002092)	0.0536072	0.118996	19.3673	56.6702	GREM1
GO_Biological_Process_2023	Blood Vessel Endothelial Cell Migration (GO:0043534)	0.0536072	0.118996	19.3673	56.6702	GREM1
GO_Biological_Process_2023	Regulation Of Protein Export From Nucleus (GO:0046825)	0.0536072	0.118996	19.3673	56.6702	GAS6
GO_Biological_Process_2023	Membrane Protein Ectodomain Proteolysis (GO:0006509)	0.0536072	0.118996	19.3673	56.6702	PRTN3
GO_Biological_Process_2023	Negative Regulation Of G Protein-Coupled Receptor Signaling Pathway (GO:0045744)	0.0536072	0.118996	19.3673	56.6702	CCL5
GO_Biological_Process_2023	Negative Regulation Of Cell Communication (GO:0010648)	0.0536072	0.118996	19.3673	56.6702	IGFBP3
GO_Biological_Process_2023	Negative Regulation Of Protein Phosphorylation (GO:0001933)	0.053525	0.118996	5.6131	16.4329	GREM1;IGFBP3
GO_Biological_Process_2023	Negative Regulation Of Lymphocyte Activation (GO:0051250)	0.0559758	0.122723	18.4861	53.2924	CTSG
GO_Biological_Process_2023	Regulation Of T Cell Migration (GO:2000404)	0.0559758	0.122723	18.4861	53.2924	CCL5
GO_Biological_Process_2023	Positive Regulation Of Epithelial Cell Apoptotic Process (GO:1904037)	0.0559758	0.122723	18.4861	53.2924	THBS1
GO_Biological_Process_2023	Regulation Of Cellular Component Organization (GO:0051128)	0.056096	0.122723	5.4633	15.7381	CISH;TFRC
GO_Biological_Process_2023	Negative Regulation Of Ossification (GO:0030279)	0.0583386	0.123182	17.6815	50.2417	GREM1
GO_Biological_Process_2023	Iron Ion Transport (GO:0006826)	0.0583386	0.123182	17.6815	50.2417	TFRC
GO_Biological_Process_2023	Positive Regulation Of Transforming Growth Factor Beta Receptor Signaling Pathway (GO:0030511)	0.0583386	0.123182	17.6815	50.2417	THBS1
GO_Biological_Process_2023	Mononuclear Cell Differentiation (GO:1903131)	0.0583386	0.123182	17.6815	50.2417	GAS6
GO_Biological_Process_2023	Response To Hexose (GO:0009746)	0.0583386	0.123182	17.6815	50.2417	THBS1
GO_Biological_Process_2023	Positive Regulation Of Cellular Response To Transforming Growth Factor Beta Stimulus (GO:1903846)	0.0583386	0.123182	17.6815	50.2417	THBS1
GO_Biological_Process_2023	Negative Regulation Of Cell Junction Assembly (GO:1901889)	0.0583386	0.123182	17.6815	50.2417	THBS1
GO_Biological_Process_2023	Eosinophil Chemotaxis (GO:0048245)	0.0583386	0.123182	17.6815	50.2417	CCL5
GO_Biological_Process_2023	Eosinophil Migration (GO:0072677)	0.0583386	0.123182	17.6815	50.2417	CCL5
GO_Biological_Process_2023	Positive Regulation Of Response To External Stimulus (GO:0032103)	0.0573977	0.123182	5.39134	15.4071	CCL5;THBS1
GO_Biological_Process_2023	Positive Regulation Of Glucose Import (GO:0046326)	0.0606955	0.124683	16.9439	47.4748	ERFE
GO_Biological_Process_2023	Regulation Of Chondrocyte Differentiation (GO:0032330)	0.0606955	0.124683	16.9439	47.4748	GREM1
GO_Biological_Process_2023	Activation Of Protein Kinase B Activity (GO:0032148)	0.0606955	0.124683	16.9439	47.4748	GAS6
GO_Biological_Process_2023	Regulation Of Platelet Aggregation (GO:0090330)	0.0606955	0.124683	16.9439	47.4748	CTSG
GO_Biological_Process_2023	Cellular Response To Hexose Stimulus (GO:0071331)	0.0606955	0.124683	16.9439	47.4748	GAS6
GO_Biological_Process_2023	Positive Regulation Of T Cell Migration (GO:2000406)	0.0606955	0.124683	16.9439	47.4748	CCL5
GO_Biological_Process_2023	Regulation Of Biomineral Tissue Development (GO:0070167)	0.0606955	0.124683	16.9439	47.4748	GAS6
GO_Biological_Process_2023	Response To Lipopolysaccharide (GO:0032496)	0.0600326	0.124683	5.25292	14.7758	CTSG;PF4
GO_Biological_Process_2023	Positive Regulation Of Macromolecule Metabolic Process (GO:0010604)	0.0626058	0.127354	3.46361	9.5973	TFRC;GAS6;PF4
GO_Biological_Process_2023	Negative Regulation Of Endothelial Cell Apoptotic Process (GO:2000352)	0.0630467	0.127354	16.2653	44.9553	GAS6
GO_Biological_Process_2023	Acute Inflammatory Response (GO:0002526)	0.0630467	0.127354	16.2653	44.9553	ELANE
GO_Biological_Process_2023	Nucleic Acid Phosphodiester Bond Hydrolysis (GO:0090305)	0.0630467	0.127354	16.2653	44.9553	RNASE2
GO_Biological_Process_2023	Nitrogen Compound Transport (GO:0071705)	0.0627089	0.127354	5.12138	14.1824	HBB;RHCE
GO_Biological_Process_2023	Regulation Of Extrinsic Apoptotic Signaling Pathway In Absence Of Ligand (GO:2001239)	0.0653922	0.129927	15.6389	42.6529	PF4
GO_Biological_Process_2023	Positive Regulation Of Nitric Oxide Biosynthetic Process (GO:0045429)	0.0653922	0.129927	15.6389	42.6529	HBB
GO_Biological_Process_2023	Cardiac Muscle Cell Differentiation (GO:0055007)	0.0653922	0.129927	15.6389	42.6529	GREM1
GO_Biological_Process_2023	Myeloid Cell Development (GO:0061515)	0.0653922	0.129927	15.6389	42.6529	ALAS2
GO_Biological_Process_2023	Dorsal/Ventral Pattern Formation (GO:0009953)	0.0653922	0.129927	15.6389	42.6529	GREM1
GO_Biological_Process_2023	RNA Phosphodiester Bond Hydrolysis (GO:0090501)	0.0677318	0.131556	15.059	40.5417	RNASE2
GO_Biological_Process_2023	Positive Regulation Of Nitric Oxide Metabolic Process (GO:1904407)	0.0677318	0.131556	15.059	40.5417	HBB
GO_Biological_Process_2023	Negative Regulation Of Signaling (GO:0023057)	0.0677318	0.131556	15.059	40.5417	IGFBP3
GO_Biological_Process_2023	Negative Regulation Of Type II Interferon Production (GO:0032689)	0.0677318	0.131556	15.059	40.5417	GAS6
GO_Biological_Process_2023	Limb Development (GO:0060173)	0.0677318	0.131556	15.059	40.5417	GREM1
GO_Biological_Process_2023	Pyroptosis (GO:0070269)	0.0677318	0.131556	15.059	40.5417	ELANE
GO_Biological_Process_2023	Positive Regulation Of Fibroblast Proliferation (GO:0048146)	0.0677318	0.131556	15.059	40.5417	GAS6
GO_Biological_Process_2023	Regulation Of Muscle Contraction (GO:0006937)	0.0700658	0.133522	14.5204	38.5999	MYL9
GO_Biological_Process_2023	Positive Regulation Of Viral Genome Replication (GO:0045070)	0.0700658	0.133522	14.5204	38.5999	CCL5
GO_Biological_Process_2023	Positive Regulation Of B Cell Proliferation (GO:0030890)	0.0700658	0.133522	14.5204	38.5999	TFRC
GO_Biological_Process_2023	Positive Regulation Of Calcium Ion Transport (GO:0051928)	0.0700658	0.133522	14.5204	38.5999	CCL5
GO_Biological_Process_2023	Response To Steroid Hormone (GO:0048545)	0.0700658	0.133522	14.5204	38.5999	THBS1
GO_Biological_Process_2023	Regulation Of Blood Coagulation (GO:0030193)	0.0700658	0.133522	14.5204	38.5999	THBS1
GO_Biological_Process_2023	Negative Regulation Of Interleukin-1 Production (GO:0032692)	0.072394	0.134573	14.019	36.8087	GAS6
GO_Biological_Process_2023	Positive Regulation Of Locomotion (GO:0040017)	0.072394	0.134573	14.019	36.8087	THBS1
GO_Biological_Process_2023	Regulation Of Macrophage Derived Foam Cell Differentiation (GO:0010743)	0.072394	0.134573	14.019	36.8087	PF4
GO_Biological_Process_2023	Phagocytosis, Engulfment (GO:0006911)	0.072394	0.134573	14.019	36.8087	THBS1
GO_Biological_Process_2023	Phospholipid Dephosphorylation (GO:0046839)	0.072394	0.134573	14.019	36.8087	PLPPR3
GO_Biological_Process_2023	Negative Regulation Of Carbohydrate Metabolic Process (GO:0045912)	0.072394	0.134573	14.019	36.8087	ERFE
GO_Biological_Process_2023	Regulation Of Cell Migration Involved In Sprouting Angiogenesis (GO:0090049)	0.072394	0.134573	14.019	36.8087	THBS1
GO_Biological_Process_2023	Positive Regulation Of Hydrolase Activity (GO:0051345)	0.0716793	0.134573	4.73563	12.481	CCL5;PRTN3
GO_Biological_Process_2023	Positive Regulation Of Glucose Transmembrane Transport (GO:0010828)	0.0747165	0.135159	13.551	35.1521	ERFE
GO_Biological_Process_2023	Regulation Of Extrinsic Apoptotic Signaling Pathway Via Death Domain Receptors (GO:1902041)	0.0747165	0.135159	13.551	35.1521	THBS1
GO_Biological_Process_2023	Regulation Of Gluconeogenesis (GO:0006111)	0.0747165	0.135159	13.551	35.1521	ERFE
GO_Biological_Process_2023	Regulation Of Macrophage Activation (GO:0043030)	0.0747165	0.135159	13.551	35.1521	THBS1
GO_Biological_Process_2023	Leukocyte Cell-Cell Adhesion (GO:0007159)	0.0747165	0.135159	13.551	35.1521	CCL5
GO_Biological_Process_2023	Negative Regulation Of Cell-Matrix Adhesion (GO:0001953)	0.0747165	0.135159	13.551	35.1521	THBS1
GO_Biological_Process_2023	Endodermal Cell Differentiation (GO:0035987)	0.0747165	0.135159	13.551	35.1521	MMP2
GO_Biological_Process_2023	Positive Regulation Of Extrinsic Apoptotic Signaling Pathway (GO:2001238)	0.0747165	0.135159	13.551	35.1521	THBS1
GO_Biological_Process_2023	Positive Regulation Of ERK1 And ERK2 Cascade (GO:0070374)	0.0738061	0.135159	4.65466	12.1315	CCL5;GAS6
GO_Biological_Process_2023	Transition Metal Ion Transport (GO:0000041)	0.0770333	0.138523	13.1132	33.616	TFRC
GO_Biological_Process_2023	Negative Regulation Of Osteoblast Differentiation (GO:0045668)	0.0770333	0.138523	13.1132	33.616	GREM1
GO_Molecular_Function_2023	Receptor Antagonist Activity (GO:0048019)	0.072394	0.138576	14.019	36.8087	CCL5
GO_Molecular_Function_2023	Cytokine Activity (GO:0005125)	0.0730949	0.138576	4.68134	12.2464	CCL5;PF4
GO_Biological_Process_2023	Negative Regulation Of Endocytosis (GO:0045806)	0.0793444	0.139775	12.7028	32.1884	PRTN3
GO_Biological_Process_2023	Negative Regulation Of Epithelial Cell Migration (GO:0010633)	0.0793444	0.139775	12.7028	32.1884	THBS1
GO_Biological_Process_2023	Negative Regulation Of Small Molecule Metabolic Process (GO:0062014)	0.0793444	0.139775	12.7028	32.1884	ERFE
GO_Biological_Process_2023	Positive Regulation Of Telomerase Activity (GO:0051973)	0.0793444	0.139775	12.7028	32.1884	GREM1
GO_Biological_Process_2023	Regulation Of Sprouting Angiogenesis (GO:1903670)	0.0793444	0.139775	12.7028	32.1884	THBS1
GO_Biological_Process_2023	Negative Regulation Of Blood Vessel Endothelial Cell Migration (GO:0043537)	0.0793444	0.139775	12.7028	32.1884	THBS1
GO_Biological_Process_2023	Signal Transduction By P53 Class Mediator (GO:0072331)	0.0793444	0.139775	12.7028	32.1884	GREM1
GO_Biological_Process_2023	Positive Regulation Of Immunoglobulin Production (GO:0002639)	0.0816498	0.141371	12.3173	30.8586	TFRC
GO_Biological_Process_2023	Superoxide Metabolic Process (GO:0006801)	0.0816498	0.141371	12.3173	30.8586	SOD3
GO_Biological_Process_2023	Negative Regulation Of Interleukin-6 Production (GO:0032715)	0.0816498	0.141371	12.3173	30.8586	GAS6
GO_Biological_Process_2023	Membrane Protein Proteolysis (GO:0033619)	0.0816498	0.141371	12.3173	30.8586	PRTN3
GO_Biological_Process_2023	Cellular Response To Glucose Stimulus (GO:0071333)	0.0816498	0.141371	12.3173	30.8586	GAS6
GO_Biological_Process_2023	Endocytosis (GO:0006897)	0.0810402	0.141371	4.40352	11.0652	GAS6;ELANE
GO_Molecular_Function_2023	Inorganic Anion Transmembrane Transporter Activity (GO:0015103)	0.0770333	0.143062	13.1132	33.616	SLC4A1
GO_Biological_Process_2023	Protein Localization To Membrane (GO:0072657)	0.0832524	0.143735	4.33333	10.7721	GAS6;ANK1
GO_Biological_Process_2023	Endoderm Formation (GO:0001706)	0.0839496	0.143786	11.9544	29.6174	MMP2
GO_Biological_Process_2023	Regulation Of Signal Transduction (GO:0009966)	0.0839939	0.143786	4.31043	10.677	IGFBP3;IGFBP7
GO_Biological_Process_2023	Regulation Of Cell Differentiation (GO:0045595)	0.0839939	0.143786	4.31043	10.677	GREM1;HEMGN
GO_Biological_Process_2023	Regulation Of Glucose Import (GO:0046324)	0.0862437	0.145988	11.6122	28.4567	ERFE
GO_Biological_Process_2023	Positive Regulation Of Signaling Receptor Activity (GO:2000273)	0.0862437	0.145988	11.6122	28.4567	GREM1
GO_Biological_Process_2023	Blood Vessel Diameter Maintenance (GO:0097746)	0.0862437	0.145988	11.6122	28.4567	KEL
GO_Biological_Process_2023	Regulation Of Receptor Internalization (GO:0002090)	0.0862437	0.145988	11.6122	28.4567	GREM1
GO_Biological_Process_2023	Negative Regulation Of Endothelial Cell Migration (GO:0010596)	0.0885322	0.147392	11.2891	27.3692	THBS1
GO_Biological_Process_2023	Negative Regulation Of Endothelial Cell Proliferation (GO:0001937)	0.0885322	0.147392	11.2891	27.3692	THBS1
GO_Biological_Process_2023	Negative Regulation Of Smooth Muscle Cell Proliferation (GO:0048662)	0.0885322	0.147392	11.2891	27.3692	IGFBP3
GO_Biological_Process_2023	Positive Regulation Of Receptor Signaling Pathway Via JAK-STAT (GO:0046427)	0.0885322	0.147392	11.2891	27.3692	CCL5
GO_Biological_Process_2023	Positive Regulation Of Receptor Signaling Pathway Via STAT (GO:1904894)	0.0885322	0.147392	11.2891	27.3692	CCL5
GO_Biological_Process_2023	Regulation Of Vascular Associated Smooth Muscle Cell Proliferation (GO:1904705)	0.0885322	0.147392	11.2891	27.3692	MMP2
GO_Biological_Process_2023	Negative Regulation Of Epithelial Cell Apoptotic Process (GO:1904036)	0.0908151	0.149549	10.9835	26.3485	GAS6
GO_Biological_Process_2023	Positive Regulation Of Myoblast Differentiation (GO:0045663)	0.0908151	0.149549	10.9835	26.3485	IGFBP3
GO_Biological_Process_2023	Positive Regulation Of Protein Tyrosine Kinase Activity (GO:0061098)	0.0908151	0.149549	10.9835	26.3485	GAS6
GO_Biological_Process_2023	Response To Peptide (GO:1901652)	0.0908151	0.149549	10.9835	26.3485	MMP2
GO_Molecular_Function_2023	Chemoattractant Activity (GO:0042056)	0.0839496	0.149792	11.9544	29.6174	CCL5
GO_Molecular_Function_2023	Inorganic Cation Transmembrane Transporter Activity (GO:0022890)	0.0839496	0.149792	11.9544	29.6174	RHCE
GO_Biological_Process_2023	Phosphorylation (GO:0016310)	0.0918776	0.150437	2.92538	6.98376	IGFBP3;CTSG;GAS6
GO_Biological_Process_2023	Positive Regulation Of Lymphocyte Differentiation (GO:0045621)	0.0930924	0.150437	10.6939	25.389	GAS6
GO_Biological_Process_2023	Negative Regulation Of Mitochondrion Organization (GO:0010823)	0.0930924	0.150437	10.6939	25.389	TFRC
GO_Biological_Process_2023	Regulation Of Nitric Oxide Biosynthetic Process (GO:0045428)	0.0930924	0.150437	10.6939	25.389	HBB
GO_Biological_Process_2023	Regulation Of Protein Tyrosine Kinase Activity (GO:0061097)	0.0930924	0.150437	10.6939	25.389	GAS6
GO_Biological_Process_2023	Negative Regulation Of Cell-Substrate Adhesion (GO:0010812)	0.0930924	0.150437	10.6939	25.389	THBS1
GO_Biological_Process_2023	Regulation Of Angiogenesis (GO:0045765)	0.0930487	0.150437	4.05316	9.62477	THBS1;PF4
GO_Molecular_Function_2023	Peptidase Inhibitor Activity (GO:0030414)	0.0885322	0.152008	11.2891	27.3692	THBS1
GO_Molecular_Function_2023	Methyltransferase Activity (GO:0008168)	0.0885322	0.152008	11.2891	27.3692	GAMT
GO_Biological_Process_2023	Regulation Of Cytokine-Mediated Signaling Pathway (GO:0001959)	0.0953641	0.152081	10.4192	24.4856	GAS6
GO_Biological_Process_2023	Positive Regulation Of Monoatomic Ion Transport (GO:0043270)	0.0953641	0.152081	10.4192	24.4856	CCL5
GO_Biological_Process_2023	Positive Regulation Of Myeloid Leukocyte Differentiation (GO:0002763)	0.0953641	0.152081	10.4192	24.4856	PF4
GO_Biological_Process_2023	Positive Regulation Of Wound Healing (GO:0090303)	0.0953641	0.152081	10.4192	24.4856	THBS1
GO_Biological_Process_2023	Cellular Response To Heat (GO:0034605)	0.0953641	0.152081	10.4192	24.4856	THBS1
GO_Biological_Process_2023	Regulation Of Chemokine Production (GO:0032642)	0.0976302	0.154073	10.1582	23.6337	ELANE
GO_Biological_Process_2023	Positive Regulation Of Response To Biotic Stimulus (GO:0002833)	0.0976302	0.154073	10.1582	23.6337	CCL5
GO_Biological_Process_2023	Positive Regulation Of Viral Process (GO:0048524)	0.0976302	0.154073	10.1582	23.6337	CCL5
GO_Biological_Process_2023	Lymphocyte Migration (GO:0072676)	0.0976302	0.154073	10.1582	23.6337	CCL5
GO_Biological_Process_2023	Regulation Of GTPase Activity (GO:0043087)	0.100019	0.156216	3.87932	8.93172	CCL5;PRTN3
GO_Biological_Process_2023	Lipid Modification (GO:0030258)	0.0998908	0.156216	9.90991	22.8292	PLPPR3
GO_Biological_Process_2023	Modulation By Host Of Symbiont Process (GO:0051851)	0.0998908	0.156216	9.90991	22.8292	CCL5
GO_Biological_Process_2023	Collagen Fibril Organization (GO:0030199)	0.0998908	0.156216	9.90991	22.8292	GREM1
GO_Biological_Process_2023	Positive Regulation Of Receptor-Mediated Endocytosis (GO:0048260)	0.102146	0.157507	9.67347	22.0686	GREM1
GO_Biological_Process_2023	Intracellular Glucose Homeostasis (GO:0001678)	0.102146	0.157507	9.67347	22.0686	GAS6
GO_Biological_Process_2023	Response To Amyloid-Beta (GO:1904645)	0.102146	0.157507	9.67347	22.0686	MMP2
GO_Biological_Process_2023	Negative Regulation Of BMP Signaling Pathway (GO:0030514)	0.102146	0.157507	9.67347	22.0686	GREM1
GO_Biological_Process_2023	Ephrin Receptor Signaling Pathway (GO:0048013)	0.102146	0.157507	9.67347	22.0686	MMP2
GO_Biological_Process_2023	Positive Regulation Of Nucleocytoplasmic Transport (GO:0046824)	0.104395	0.157764	9.44803	21.3485	GAS6
GO_Biological_Process_2023	Regulation Of Insulin Receptor Signaling Pathway (GO:0046626)	0.104395	0.157764	9.44803	21.3485	ERFE
GO_Biological_Process_2023	Phosphatidylinositol Phosphate Biosynthetic Process (GO:0046854)	0.104395	0.157764	9.44803	21.3485	CISH
GO_Biological_Process_2023	Cellular Response To Ketone (GO:1901655)	0.104395	0.157764	9.44803	21.3485	GAS6
GO_Biological_Process_2023	Regulation Of B Cell Proliferation (GO:0030888)	0.104395	0.157764	9.44803	21.3485	TFRC
GO_Biological_Process_2023	Positive Regulation Of Biosynthetic Process (GO:0009891)	0.104395	0.157764	9.44803	21.3485	CCL5
GO_Biological_Process_2023	Positive Regulation Of Chemotaxis (GO:0050921)	0.104395	0.157764	9.44803	21.3485	THBS1
GO_Biological_Process_2023	Positive Regulation Of Cytokine-Mediated Signaling Pathway (GO:0001961)	0.104395	0.157764	9.44803	21.3485	GAS6
GO_Biological_Process_2023	Positive Regulation Of Cell Motility (GO:2000147)	0.10554	0.159098	3.754	8.44147	CCL5;THBS1
GO_Biological_Process_2023	Positive Regulation Of Innate Immune Response (GO:0045089)	0.106639	0.159959	9.23284	20.6659	CCL5
GO_Biological_Process_2023	Regulation Of Telomerase Activity (GO:0051972)	0.106639	0.159959	9.23284	20.6659	GREM1
GO_Biological_Process_2023	Positive Regulation Of Protein Modification Process (GO:0031401)	0.108732	0.160926	3.68591	8.17855	TFRC;GAS6
GO_Biological_Process_2023	Regulation Of Fibroblast Proliferation (GO:0048145)	0.108878	0.160926	9.02721	20.0181	GAS6
GO_Biological_Process_2023	Myofibril Assembly (GO:0030239)	0.108878	0.160926	9.02721	20.0181	MYL9
GO_Biological_Process_2023	Positive Regulation Of Blood Vessel Endothelial Cell Migration (GO:0043536)	0.108878	0.160926	9.02721	20.0181	THBS1
GO_Biological_Process_2023	Response To Hydrogen Peroxide (GO:0042542)	0.108878	0.160926	9.02721	20.0181	HBB
GO_Biological_Process_2023	Positive Regulation Of Cell-Cell Adhesion (GO:0022409)	0.108878	0.160926	9.02721	20.0181	CCL5
GO_Biological_Process_2023	Cellular Response To Lipid (GO:0071396)	0.111143	0.162688	3.63643	7.989	CTSG;PF4
GO_Biological_Process_2023	Negative Regulation Of Tumor Necrosis Factor Production (GO:0032720)	0.111111	0.162688	8.83052	19.4027	GAS6
GO_Biological_Process_2023	Positive Regulation Of TOR Signaling (GO:0032008)	0.111111	0.162688	8.83052	19.4027	GAS6
GO_Biological_Process_2023	Regulation Of Cell Growth (GO:0001558)	0.110338	0.162688	3.65278	8.05148	CISH;TFRC
GO_Biological_Process_2023	Positive Regulation Of Reactive Oxygen Species Metabolic Process (GO:2000379)	0.113338	0.164707	8.64221	18.8174	THBS1
GO_Biological_Process_2023	Regulation Of Tumor Necrosis Factor-Mediated Signaling Pathway (GO:0010803)	0.113338	0.164707	8.64221	18.8174	GAS6
GO_Biological_Process_2023	Chloride Transmembrane Transport (GO:1902476)	0.113338	0.164707	8.64221	18.8174	SLC4A1
GO_Biological_Process_2023	Negative Regulation Of Tumor Necrosis Factor Superfamily Cytokine Production (GO:1903556)	0.11556	0.166737	8.46173	18.2601	GAS6
GO_Biological_Process_2023	Negative Regulation Of T Cell Activation (GO:0050868)	0.11556	0.166737	8.46173	18.2601	CTSG
GO_Biological_Process_2023	Regulation Of Cell Communication (GO:0010646)	0.11556	0.166737	8.46173	18.2601	IGFBP7
GO_Biological_Process_2023	Positive Regulation Of GTPase Activity (GO:0043547)	0.116008	0.166985	3.54131	7.62832	CCL5;PRTN3
GO_Molecular_Function_2023	Endopeptidase Regulator Activity (GO:0061135)	0.0998908	0.168334	9.90991	22.8292	THBS1
GO_Biological_Process_2023	Regulation Of Interleukin-12 Production (GO:0032655)	0.117777	0.169129	8.28863	17.7291	THBS1
GO_Biological_Process_2023	Regulation Of Stress-Activated MAPK Cascade (GO:0032872)	0.119988	0.171088	8.12245	17.2226	GREM1
GO_Biological_Process_2023	Positive Regulation Of DNA Recombination (GO:0045911)	0.119988	0.171088	8.12245	17.2226	TFRC
GO_Biological_Process_2023	Receptor Internalization (GO:0031623)	0.119988	0.171088	8.12245	17.2226	TFRC
GO_Biological_Process_2023	Regulation Of Inflammatory Response (GO:0050727)	0.120927	0.171808	3.45098	7.29044	CCL5;ELANE
GO_Biological_Process_2023	Negative Regulation Of Response To Stimulus (GO:0048585)	0.122193	0.171808	7.96279	16.739	IGFBP3
GO_Biological_Process_2023	Regulation Of Peptide Hormone Secretion (GO:0090276)	0.122193	0.171808	7.96279	16.739	CCL5
GO_Biological_Process_2023	Regulation Of Protein Localization To Nucleus (GO:1900180)	0.122193	0.171808	7.96279	16.739	TFRC
GO_Biological_Process_2023	Cardiac Muscle Tissue Development (GO:0048738)	0.122193	0.171808	7.96279	16.739	GREM1
GO_Biological_Process_2023	Positive Regulation Of B Cell Activation (GO:0050871)	0.122193	0.171808	7.96279	16.739	TFRC
GO_Molecular_Function_2023	CCR Chemokine Receptor Binding (GO:0048020)	0.104395	0.172727	9.44803	21.3485	CCL5
GO_Molecular_Function_2023	Copper Ion Binding (GO:0005507)	0.106639	0.173289	9.23284	20.6659	SOD3
GO_Biological_Process_2023	Regulation Of ERK1 And ERK2 Cascade (GO:0070372)	0.124235	0.173692	3.39325	7.0769	CCL5;GAS6
GO_Biological_Process_2023	Negative Regulation Of Viral Genome Replication (GO:0045071)	0.124393	0.173692	7.80926	16.2769	CCL5
GO_Biological_Process_2023	Regulation Of Receptor Signaling Pathway Via JAK-STAT (GO:0046425)	0.124393	0.173692	7.80926	16.2769	CCL5
GO_Molecular_Function_2023	Hydro-Lyase Activity (GO:0016836)	0.108878	0.173822	9.02721	20.0181	CA1
GO_Biological_Process_2023	Regulation Of Focal Adhesion Assembly (GO:0051893)	0.126588	0.175143	7.66153	15.835	THBS1
GO_Biological_Process_2023	Regulation Of Myoblast Differentiation (GO:0045661)	0.126588	0.175143	7.66153	15.835	IGFBP3
GO_Biological_Process_2023	Monoatomic Anion Transmembrane Transport (GO:0098656)	0.126588	0.175143	7.66153	15.835	SLC4A1
GO_Biological_Process_2023	Regulation Of Blood Vessel Endothelial Cell Migration (GO:0043535)	0.126588	0.175143	7.66153	15.835	THBS1
GO_Biological_Process_2023	Positive Regulation Of Tyrosine Phosphorylation Of STAT Protein (GO:0042531)	0.128778	0.177362	7.51927	15.412	CCL5
GO_Biological_Process_2023	Cellular Response To Fibroblast Growth Factor Stimulus (GO:0044344)	0.128778	0.177362	7.51927	15.412	CCL5
GO_Biological_Process_2023	Protein Phosphorylation (GO:0006468)	0.12916	0.177486	2.49835	5.11338	IGFBP3;CTSG;GAS6
GO_Biological_Process_2023	Regulation Of Reactive Oxygen Species Metabolic Process (GO:2000377)	0.130962	0.179554	7.38219	15.0069	THBS1
GO_Molecular_Function_2023	Pyrophosphatase Activity (GO:0016462)	0.11556	0.18131	8.46173	18.2601	PHOSPHO1
GO_Molecular_Function_2023	S-adenosylmethionine-dependent Methyltransferase Activity (GO:0008757)	0.117777	0.181655	8.28863	17.7291	GAMT
GO_Biological_Process_2023	Monoatomic Anion Transport (GO:0006820)	0.133141	0.181719	7.25	14.6185	SLC4A1
GO_Biological_Process_2023	Regulation Of Calcium Ion Transport (GO:0051924)	0.133141	0.181719	7.25	14.6185	CCL5
GO_Molecular_Function_2023	Channel Activity (GO:0015267)	0.122193	0.182288	7.96279	16.739	RHCE
GO_Molecular_Function_2023	Phosphoric Ester Hydrolase Activity (GO:0042578)	0.122193	0.182288	7.96279	16.739	PHOSPHO1
GO_Molecular_Function_2023	Antiporter Activity (GO:0015297)	0.124393	0.182578	7.80926	16.2769	SLC4A1
GO_Biological_Process_2023	Inorganic Anion Transport (GO:0015698)	0.135314	0.183446	7.12245	14.246	SLC4A1
GO_Biological_Process_2023	Response To Organic Cyclic Compound (GO:0014070)	0.135314	0.183446	7.12245	14.246	CCL5
GO_Biological_Process_2023	Regulation Of Bone Mineralization (GO:0030500)	0.135314	0.183446	7.12245	14.246	GREM1
GO_Biological_Process_2023	Negative Regulation Of Cytokine-Mediated Signaling Pathway (GO:0001960)	0.137482	0.185969	6.9993	13.8884	GAS6
GO_Molecular_Function_2023	Chloride Transmembrane Transporter Activity (GO:0015108)	0.128778	0.186012	7.51927	15.412	SLC4A1
GO_Biological_Process_2023	Regulation Of Extrinsic Apoptotic Signaling Pathway (GO:2001236)	0.139645	0.187638	6.88032	13.545	THBS1
GO_Biological_Process_2023	Positive Regulation Of Phagocytosis (GO:0050766)	0.139645	0.187638	6.88032	13.545	GAS6
GO_Biological_Process_2023	Response To Light Stimulus (GO:0009416)	0.139645	0.187638	6.88032	13.545	ELANE
GO_Biological_Process_2023	Positive Regulation Of Interleukin-8 Production (GO:0032757)	0.141802	0.189277	6.76531	13.2148	ELANE
GO_Biological_Process_2023	Negative Regulation Of Viral Process (GO:0048525)	0.141802	0.189277	6.76531	13.2148	CCL5
GO_Biological_Process_2023	Regulation Of Pathway-Restricted SMAD Protein Phosphorylation (GO:0060393)	0.141802	0.189277	6.76531	13.2148	GREM1
GO_Biological_Process_2023	Positive Regulation Of Signal Transduction (GO:0009967)	0.142807	0.1902	3.10701	6.04705	GAS6;ERFE
GO_Biological_Process_2023	Inorganic Anion Transmembrane Transport (GO:0098661)	0.146101	0.19416	6.54641	12.5918	SLC4A1
GO_Molecular_Function_2023	Receptor Tyrosine Kinase Binding (GO:0030971)	0.137482	0.195482	6.9993	13.8884	GAS6
GO_Biological_Process_2023	Positive Regulation Of Cell Migration (GO:0030335)	0.147973	0.195718	3.03704	5.80294	CCL5;THBS1
GO_Biological_Process_2023	Cellular Response To Virus (GO:0098586)	0.148242	0.195718	6.44218	12.2975	CCL5
GO_Biological_Process_2023	Response To Metal Ion (GO:0010038)	0.148242	0.195718	6.44218	12.2975	THBS1
GO_Biological_Process_2023	Negative Regulation Of Cellular Process (GO:0048523)	0.150441	0.196059	2.32082	4.39606	IGFBP3;IGFBP7;THBS1
GO_Biological_Process_2023	Regulation Of Translational Initiation (GO:0006446)	0.150378	0.196059	6.3412	12.014	CCL5
GO_Biological_Process_2023	Positive Regulation Of DNA Biosynthetic Process (GO:2000573)	0.150378	0.196059	6.3412	12.014	GREM1
GO_Biological_Process_2023	Regulation Of Tyrosine Phosphorylation Of STAT Protein (GO:0042509)	0.150378	0.196059	6.3412	12.014	CCL5
GO_Biological_Process_2023	Monocarboxylic Acid Biosynthetic Process (GO:0072330)	0.150378	0.196059	6.3412	12.014	GAMT
GO_Biological_Process_2023	Regulation Of Cell-Matrix Adhesion (GO:0001952)	0.150378	0.196059	6.3412	12.014	THBS1
GO_Molecular_Function_2023	Metal Ion Binding (GO:0046872)	0.141099	0.197539	2.39448	4.68909	IGFBP3;MYL9;THBS1
GO_Biological_Process_2023	Cellular Response To Type II Interferon (GO:0071346)	0.152509	0.197903	6.24333	11.7408	CCL5
GO_Biological_Process_2023	Response To Reactive Oxygen Species (GO:0000302)	0.152509	0.197903	6.24333	11.7408	HBB
GO_Biological_Process_2023	Regulation Of Viral Genome Replication (GO:0045069)	0.154635	0.200233	6.14842	11.4772	CCL5
GO_Biological_Process_2023	Cell-Cell Junction Organization (GO:0045216)	0.156756	0.202546	6.05635	11.2228	PRTN3
GO_Biological_Process_2023	Positive Regulation Of Cell Differentiation (GO:0045597)	0.157543	0.20313	2.91652	5.38989	IGFBP3;PF4
GO_Biological_Process_2023	Inorganic Cation Transmembrane Transport (GO:0098662)	0.158419	0.203543	2.90603	5.35439	GAS6;RHCE
GO_Biological_Process_2023	Positive Regulation Of Phosphatidylinositol 3-Kinase Signaling (GO:0014068)	0.158871	0.203543	5.96699	10.9772	CCL5
GO_Biological_Process_2023	Phospholipid Metabolic Process (GO:0006644)	0.158871	0.203543	5.96699	10.9772	PLPPR3
GO_Biological_Process_2023	Negative Regulation Of Epithelial Cell Proliferation (GO:0050680)	0.160981	0.204946	5.88021	10.74	THBS1
GO_Biological_Process_2023	Regulation Of G Protein-Coupled Receptor Signaling Pathway (GO:0008277)	0.160981	0.204946	5.88021	10.74	CCL5
GO_Biological_Process_2023	Regulation Of Cellular Biosynthetic Process (GO:0031326)	0.160981	0.204946	5.88021	10.74	CCL5
GO_Biological_Process_2023	Myeloid Leukocyte Differentiation (GO:0002573)	0.163086	0.207191	5.79592	10.5108	PRTN3
GO_Molecular_Function_2023	Double-Stranded RNA Binding (GO:0003725)	0.150378	0.20734	6.3412	12.014	TFRC
GO_Biological_Process_2023	Positive Regulation Of Protein Localization To Nucleus (GO:1900182)	0.165186	0.20942	5.714	10.2891	TFRC
GO_Cellular_Component_2023	Myofibril (GO:0030016)	0.0700658	0.214319	14.5204	38.5999	MYL9
GO_Biological_Process_2023	Negative Regulation Of Phosphorylation (GO:0042326)	0.171454	0.216461	5.48152	9.66634	IGFBP3
GO_Biological_Process_2023	Regulation Of BMP Signaling Pathway (GO:0030510)	0.171454	0.216461	5.48152	9.66634	GREM1
GO_Biological_Process_2023	Actomyosin Structure Organization (GO:0031032)	0.175607	0.220784	5.33673	9.28328	MYL9
GO_Biological_Process_2023	Chloride Transport (GO:0006821)	0.175607	0.220784	5.33673	9.28328	SLC4A1
GO_Biological_Process_2023	Regulation Of Innate Immune Response (GO:0045088)	0.177676	0.221547	5.26716	9.10056	CCL5
GO_Biological_Process_2023	Negative Regulation Of Protein Modification Process (GO:0031400)	0.177676	0.221547	5.26716	9.10056	IGFBP3
GO_Biological_Process_2023	Organonitrogen Compound Catabolic Process (GO:1901565)	0.177676	0.221547	5.26716	9.10056	ELANE
GO_Biological_Process_2023	Regulation Of TOR Signaling (GO:0032006)	0.177676	0.221547	5.26716	9.10056	GAS6
GO_Biological_Process_2023	Cellular Response To UV (GO:0034644)	0.17974	0.223202	5.19937	8.92339	MMP2
GO_Biological_Process_2023	Positive Regulation Of Endocytosis (GO:0045807)	0.17974	0.223202	5.19937	8.92339	GAS6
GO_Biological_Process_2023	Positive Regulation Of Immune Response (GO:0050778)	0.181799	0.224379	5.1333	8.75153	CCL5
GO_Biological_Process_2023	Calcium Ion Transmembrane Transport (GO:0070588)	0.181799	0.224379	5.1333	8.75153	GAS6
GO_Biological_Process_2023	Response To Type II Interferon (GO:0034341)	0.181799	0.224379	5.1333	8.75153	CCL5
GO_Biological_Process_2023	Regulation Of Interleukin-8 Production (GO:0032677)	0.183852	0.225536	5.06888	8.58476	ELANE
GO_Biological_Process_2023	Activation Of Protein Kinase Activity (GO:0032147)	0.183852	0.225536	5.06888	8.58476	GAS6
GO_Biological_Process_2023	Cellular Response To Interleukin-1 (GO:0071347)	0.183852	0.225536	5.06888	8.58476	CCL5
GO_Molecular_Function_2023	Hormone Activity (GO:0005179)	0.16937	0.226656	5.55689	9.86721	ERFE
GO_Molecular_Function_2023	ATPase Binding (GO:0051117)	0.16728	0.226656	5.63435	10.0747	ANK1
GO_Biological_Process_2023	Cellular Response To Organic Substance (GO:0071310)	0.185901	0.227129	5.00605	8.42288	CCL5
GO_Biological_Process_2023	Negative Regulation Of Apoptotic Signaling Pathway (GO:2001234)	0.185901	0.227129	5.00605	8.42288	THBS1
GO_Biological_Process_2023	Supramolecular Fiber Organization (GO:0097435)	0.186903	0.227894	2.60563	4.37006	GREM1;MYL9
GO_Biological_Process_2023	Regulation Of Epithelial To Mesenchymal Transition (GO:0010717)	0.187945	0.228246	4.94475	8.26568	GREM1
GO_Biological_Process_2023	Vascular Transport (GO:0010232)	0.187945	0.228246	4.94475	8.26568	TFRC
GO_Biological_Process_2023	Transport Across Blood-Brain Barrier (GO:0150104)	0.192017	0.230878	4.82653	7.9646	TFRC
GO_Biological_Process_2023	Positive Regulation Of Protein Localization (GO:1903829)	0.192017	0.230878	4.82653	7.9646	TFRC
GO_Biological_Process_2023	Positive Regulation Of Amide Metabolic Process (GO:0034250)	0.192017	0.230878	4.82653	7.9646	THBS1
GO_Biological_Process_2023	Response To Interleukin-1 (GO:0070555)	0.192017	0.230878	4.82653	7.9646	CCL5
GO_Biological_Process_2023	Positive Regulation Of Endothelial Cell Migration (GO:0010595)	0.192017	0.230878	4.82653	7.9646	THBS1
GO_Biological_Process_2023	Regulation Of Insulin Secretion (GO:0050796)	0.196069	0.234818	4.71381	7.68016	CCL5
GO_Biological_Process_2023	Regulation Of Type II Interferon Production (GO:0032649)	0.196069	0.234818	4.71381	7.68016	GAS6
GO_Biological_Process_2023	Regulation Of Endothelial Cell Migration (GO:0010594)	0.198088	0.236301	4.65939	7.54377	THBS1
GO_Biological_Process_2023	Positive Regulation Of Cell Adhesion (GO:0045785)	0.198088	0.236301	4.65939	7.54377	CCL5
GO_Biological_Process_2023	Organic Anion Transport (GO:0015711)	0.200101	0.238235	4.60622	7.41108	SLC4A1
GO_Biological_Process_2023	Regulation Of Phosphatidylinositol 3-Kinase Signaling (GO:0014066)	0.20211	0.240154	4.55423	7.28196	CCL5
GO_Biological_Process_2023	Regulation Of Endothelial Cell Proliferation (GO:0001936)	0.208106	0.246314	4.40506	6.91464	THBS1
GO_Biological_Process_2023	Positive Regulation Of Cellular Component Biogenesis (GO:0044089)	0.208106	0.246314	4.40506	6.91464	TFRC
GO_Biological_Process_2023	Muscle Contraction (GO:0006936)	0.210095	0.248183	4.35747	6.7985	GAMT
GO_Biological_Process_2023	Positive Regulation Of Transmembrane Receptor Protein Serine/Threonine Kinase Signaling Pathway (GO:0090100)	0.21208	0.249554	4.3109	6.68532	THBS1
GO_Biological_Process_2023	Positive Regulation Of Epithelial Cell Migration (GO:0010634)	0.21208	0.249554	4.3109	6.68532	THBS1
GO_Molecular_Function_2023	Growth Factor Activity (GO:0008083)	0.192017	0.249622	4.82653	7.9646	CLEC11A
GO_Molecular_Function_2023	Protein Tyrosine Kinase Binding (GO:1990782)	0.192017	0.249622	4.82653	7.9646	GAS6
GO_Biological_Process_2023	Monocarboxylic Acid Metabolic Process (GO:0032787)	0.216033	0.253713	4.22066	6.46742	GAMT
GO_Molecular_Function_2023	Protein Kinase Activator Activity (GO:0030295)	0.198088	0.253887	4.65939	7.54377	GAS6
GO_Biological_Process_2023	Negative Regulation Of Macromolecule Biosynthetic Process (GO:0010558)	0.218003	0.254057	4.17694	6.36252	PF4
GO_Biological_Process_2023	MAPK Cascade (GO:0000165)	0.218003	0.254057	4.17694	6.36252	CCL5
GO_Biological_Process_2023	Positive Regulation Of Protein-Containing Complex Assembly (GO:0031334)	0.218003	0.254057	4.17694	6.36252	TFRC
GO_Biological_Process_2023	Phosphatidylinositol Biosynthetic Process (GO:0006661)	0.218003	0.254057	4.17694	6.36252	CISH
GO_Biological_Process_2023	Response To UV (GO:0009411)	0.221927	0.258134	4.09215	6.16035	ELANE
GO_Biological_Process_2023	Protein Catabolic Process (GO:0030163)	0.225832	0.261672	4.01071	5.96779	ELANE
GO_Biological_Process_2023	Regulation Of Protein Secretion (GO:0050708)	0.225832	0.261672	4.01071	5.96779	CCL5
GO_Biological_Process_2023	Positive Regulation Of Kinase Activity (GO:0033674)	0.229718	0.26516	3.93244	5.78423	GAS6
GO_Biological_Process_2023	Positive Regulation Of Vasculature Development (GO:1904018)	0.229718	0.26516	3.93244	5.78423	THBS1
GO_Biological_Process_2023	Response To Calcium Ion (GO:0051592)	0.233585	0.269111	3.85714	5.6091	THBS1
GO_Molecular_Function_2023	Calcium Ion Binding (GO:0005509)	0.214226	0.270758	2.37476	3.65884	MYL9;THBS1
GO_Biological_Process_2023	Monoatomic Ion Transport (GO:0006811)	0.235511	0.270815	3.82056	5.52453	SLC4A1
GO_Biological_Process_2023	Response To Tumor Necrosis Factor (GO:0034612)	0.237432	0.272508	3.78467	5.44187	CCL5
GO_Biological_Process_2023	Extracellular Structure Organization (GO:0043062)	0.239349	0.274188	3.74943	5.36106	MMP2
GO_Biological_Process_2023	External Encapsulating Structure Organization (GO:0045229)	0.241261	0.274926	3.71485	5.28205	MMP2
GO_Biological_Process_2023	Adenylate Cyclase-Activating G Protein-Coupled Receptor Signaling Pathway (GO:0007189)	0.241261	0.274926	3.71485	5.28205	PF4
GO_Biological_Process_2023	Positive Regulation Of Protein Phosphorylation (GO:0001934)	0.24285	0.274926	2.175	3.0783	TFRC;GAS6
GO_Biological_Process_2023	Negative Regulation Of Inflammatory Response (GO:0050728)	0.243169	0.274926	3.68089	5.20478	ELANE
GO_Biological_Process_2023	Negative Regulation Of Transmembrane Receptor Protein Serine/Threonine Kinase Signaling Pathway (GO:0090101)	0.243169	0.274926	3.68089	5.20478	GREM1
GO_Biological_Process_2023	Regulation Of Transforming Growth Factor Beta Receptor Signaling Pathway (GO:0017015)	0.243169	0.274926	3.68089	5.20478	THBS1
GO_Biological_Process_2023	Cytoskeleton Organization (GO:0007010)	0.243169	0.274926	3.68089	5.20478	ANK1
GO_Biological_Process_2023	Negative Regulation Of Defense Response (GO:0031348)	0.245071	0.276561	3.64755	5.1292	ELANE
GO_Molecular_Function_2023	Cytokine Receptor Binding (GO:0005126)	0.221927	0.276649	4.09215	6.16035	CCL5
GO_Biological_Process_2023	Positive Regulation Of Cellular Component Organization (GO:0051130)	0.246969	0.278185	3.6148	5.05526	TFRC
GO_Biological_Process_2023	Regulation Of Interleukin-6 Production (GO:0032675)	0.248862	0.278763	3.58263	4.98291	GAS6
GO_Biological_Process_2023	Response To Endoplasmic Reticulum Stress (GO:0034976)	0.248862	0.278763	3.58263	4.98291	THBS1
GO_Biological_Process_2023	Negative Regulation Of Canonical Wnt Signaling Pathway (GO:0090090)	0.248862	0.278763	3.58263	4.98291	GREM1
GO_Molecular_Function_2023	Carboxylic Ester Hydrolase Activity (GO:0052689)	0.229718	0.282491	3.93244	5.78423	CA1
GO_Biological_Process_2023	Regulation Of Protein Kinase Activity (GO:0045859)	0.258259	0.287165	3.42996	4.64345	GAS6
GO_Biological_Process_2023	Regulation Of Protein-Containing Complex Assembly (GO:0043254)	0.258259	0.287165	3.42996	4.64345	TFRC
GO_Biological_Process_2023	Cellular Response To Tumor Necrosis Factor (GO:0071356)	0.258259	0.287165	3.42996	4.64345	CCL5
GO_Biological_Process_2023	Positive Regulation Of Angiogenesis (GO:0045766)	0.258259	0.287165	3.42996	4.64345	THBS1
GO_Biological_Process_2023	Positive Regulation Of Macromolecule Biosynthetic Process (GO:0010557)	0.263842	0.2923	3.34441	4.45611	THBS1
GO_Biological_Process_2023	Receptor-Mediated Endocytosis (GO:0006898)	0.263842	0.2923	3.34441	4.45611	TFRC
GO_Cellular_Component_2023	Sarcoplasmic Reticulum (GO:0016529)	0.106639	0.293206	9.23284	20.6659	THBS1
GO_Cellular_Component_2023	Lytic Vacuole (GO:0000323)	0.107133	0.293206	3.71965	8.30851	CTSG;MPO
GO_Molecular_Function_2023	Phosphatase Binding (GO:0019902)	0.245071	0.293441	3.64755	5.1292	ANK1
GO_Molecular_Function_2023	Endopeptidase Inhibitor Activity (GO:0004866)	0.245071	0.293441	3.64755	5.1292	THBS1
GO_Biological_Process_2023	Organonitrogen Compound Biosynthetic Process (GO:1901566)	0.265693	0.293814	3.31683	4.39617	ALAS2
GO_Biological_Process_2023	Positive Regulation Of Defense Response (GO:0031349)	0.26754	0.295318	3.2897	4.33741	CCL5
GO_Molecular_Function_2023	Protein Phosphatase Binding (GO:0019903)	0.250751	0.296342	3.55102	4.91211	ANK1
GO_Biological_Process_2023	Cellular Response To Oxygen-Containing Compound (GO:1901701)	0.2698	0.29727	2.01588	2.64096	CTSG;PF4
GO_Biological_Process_2023	Positive Regulation Of Intracellular Protein Transport (GO:0090316)	0.271221	0.298294	3.23673	4.22336	GAS6
GO_Biological_Process_2023	Vesicle-Mediated Transport (GO:0016192)	0.274452	0.3013	1.99073	2.57397	CCL5;ANK1
GO_Biological_Process_2023	Non-Membrane-Bounded Organelle Assembly (GO:0140694)	0.287561	0.315121	3.01797	3.76136	MYL9
GO_Biological_Process_2023	Negative Regulation Of Cellular Biosynthetic Process (GO:0031327)	0.291143	0.31847	2.97329	3.66887	ERFE
GO_Biological_Process_2023	Regulation Of Cell Migration (GO:0030334)	0.295833	0.323018	1.88252	2.29284	CCL5;THBS1
GO_Biological_Process_2023	Negative Regulation Of Wnt Signaling Pathway (GO:0030178)	0.296482	0.323145	2.90868	3.53627	GREM1
GO_Cellular_Component_2023	Tertiary Granule Lumen (GO:1904724)	0.124393	0.323423	7.80926	16.2769	HBB
GO_Biological_Process_2023	Positive Regulation Of Transferase Activity (GO:0051347)	0.301783	0.328331	2.8468	3.41059	GREM1
GO_Biological_Process_2023	Regulation Of Cell Adhesion (GO:0030155)	0.303541	0.329652	2.82674	3.37015	CCL5
GO_Cellular_Component_2023	Extracellular Vesicle (GO:1903561)	0.139645	0.330315	6.88032	13.545	TFRC
GO_Cellular_Component_2023	Specific Granule Lumen (GO:0035580)	0.141802	0.330315	6.76531	13.2148	ELANE
GO_Cellular_Component_2023	Cortical Cytoskeleton (GO:0030863)	0.146101	0.330315	6.54641	12.5918	SLC4A1
GO_Biological_Process_2023	Negative Regulation Of Response To External Stimulus (GO:0032102)	0.307044	0.33286	2.78747	3.29135	ELANE
GO_Biological_Process_2023	Dephosphorylation (GO:0016311)	0.308789	0.334154	2.76824	3.25295	PLPPR3
GO_Biological_Process_2023	Defense Response To Symbiont (GO:0140546)	0.31053	0.334945	2.74927	3.2152	RNASE2
GO_Biological_Process_2023	Regulation Of Gene Expression (GO:0010468)	0.310626	0.334945	1.45782	1.70443	TFRC;GAS6;PF4;KLF1
GO_Biological_Process_2023	Negative Regulation Of DNA-binding Transcription Factor Activity (GO:0043433)	0.312267	0.336117	2.73056	3.17809	GAS6
GO_Cellular_Component_2023	Clathrin-Coated Endocytic Vesicle Membrane (GO:0030669)	0.156756	0.339637	6.05635	11.2228	TFRC
GO_Biological_Process_2023	Cellular Response To Organic Cyclic Compound (GO:0071407)	0.317451	0.340487	2.6759	3.07042	CCL5
GO_Biological_Process_2023	Positive Regulation Of NF-kappaB Transcription Factor Activity (GO:0051092)	0.317451	0.340487	2.6759	3.07042	TFRC
GO_Biological_Process_2023	Cellular Response To Growth Factor Stimulus (GO:0071363)	0.322596	0.345395	2.62338	2.96797	CCL5
GO_Molecular_Function_2023	G Protein-Coupled Receptor Binding (GO:0001664)	0.296482	0.345896	2.90868	3.53627	CCL5
GO_Biological_Process_2023	Peptidyl-Serine Phosphorylation (GO:0018105)	0.327704	0.350244	2.57286	2.8704	GAS6
GO_Cellular_Component_2023	Plasma Membrane Raft (GO:0044853)	0.185901	0.356603	5.00605	8.42288	PRTN3
GO_Cellular_Component_2023	Clathrin-Coated Endocytic Vesicle (GO:0045334)	0.192017	0.356603	4.82653	7.9646	TFRC
GO_Cellular_Component_2023	Cytoskeleton (GO:0005856)	0.188401	0.356603	2.07275	3.45981	EPB42;SLC4A1;ANK1
GO_Cellular_Component_2023	Cytoplasmic Stress Granule (GO:0010494)	0.173533	0.356603	5.40816	9.47179	CTSG
GO_Biological_Process_2023	Adenylate Cyclase-Modulating G Protein-Coupled Receptor Signaling Pathway (GO:0007188)	0.336133	0.35799	2.49282	2.71779	PF4
GO_Biological_Process_2023	Negative Regulation Of Cell Migration (GO:0030336)	0.336133	0.35799	2.49282	2.71779	IGFBP3
GO_Cellular_Component_2023	Clathrin-Coated Vesicle Membrane (GO:0030665)	0.20211	0.362404	4.55423	7.28196	TFRC
GO_Biological_Process_2023	Peptidyl-Serine Modification (GO:0018209)	0.34114	0.362686	2.44712	2.63179	GAS6
GO_Biological_Process_2023	Metal Ion Transport (GO:0030001)	0.349404	0.370821	2.37455	2.4969	CCL5
GO_Biological_Process_2023	Positive Regulation Of I-kappaB kinase/NF-kappaB Signaling (GO:0043123)	0.355942	0.377099	2.31949	2.39601	TFRC
GO_Cellular_Component_2023	Phagocytic Vesicle (GO:0045335)	0.221927	0.384673	4.09215	6.16035	MPO
GO_Biological_Process_2023	Macromolecule Biosynthetic Process (GO:0009059)	0.368825	0.390066	2.21664	2.21095	ALAS2
GO_Biological_Process_2023	Phosphate-Containing Compound Metabolic Process (GO:0006796)	0.370417	0.391068	2.20442	2.18926	PLPPR3
GO_Biological_Process_2023	Defense Response To Virus (GO:0051607)	0.378321	0.398717	2.14525	2.08521	RNASE2
GO_Biological_Process_2023	Positive Regulation Of Protein Metabolic Process (GO:0051247)	0.389223	0.409495	2.0675	1.9509	THBS1
GO_Biological_Process_2023	Organic Substance Transport (GO:0071702)	0.396895	0.416843	2.01531	1.86231	CCL5
GO_Biological_Process_2023	Regulation Of Translation (GO:0006417)	0.398418	0.417719	2.00518	1.84527	THBS1
GO_Biological_Process_2023	Regulation Of MAPK Cascade (GO:0043408)	0.401453	0.420174	1.98522	1.81184	GREM1
GO_Biological_Process_2023	Regulation Of Canonical Wnt Signaling Pathway (GO:0060828)	0.405977	0.423446	1.95601	1.76327	GREM1
GO_Biological_Process_2023	Negative Regulation Of Cell Differentiation (GO:0045596)	0.405977	0.423446	1.95601	1.76327	GREM1
GO_Biological_Process_2023	Protein Stabilization (GO:0050821)	0.407478	0.424281	1.94647	1.74748	AHSP
GO_Cellular_Component_2023	Ficolin-1-Rich Granule Lumen (GO:1904813)	0.265693	0.434753	3.31683	4.39617	HBB
GO_Cellular_Component_2023	Cytoplasmic Side Of Plasma Membrane (GO:0009898)	0.26754	0.434753	3.2897	4.33741	ANK1
GO_Biological_Process_2023	Negative Regulation Of Intracellular Signal Transduction (GO:1902532)	0.440984	0.457596	1.74978	1.43263	THBS1
GO_Biological_Process_2023	Negative Regulation Of Multicellular Organismal Process (GO:0051241)	0.440984	0.457596	1.74978	1.43263	GAS6
GO_Biological_Process_2023	Regulation Of I-kappaB kinase/NF-kappaB Signaling (GO:0043122)	0.442398	0.458279	1.74212	1.42078	TFRC
GO_Biological_Process_2023	Positive Regulation Of Developmental Process (GO:0051094)	0.443808	0.458955	1.73452	1.40906	TFRC
GO_Biological_Process_2023	Positive Regulation Of Programmed Cell Death (GO:0043068)	0.460462	0.475366	1.64821	1.27823	IGFBP3
GO_Biological_Process_2023	Positive Regulation Of DNA-binding Transcription Factor Activity (GO:0051091)	0.461828	0.475965	1.6414	1.26809	TFRC
GO_Cellular_Component_2023	Recycling Endosome (GO:0055037)	0.329398	0.483102	2.55645	2.8389	TFRC
GO_Cellular_Component_2023	Specific Granule (GO:0042581)	0.329398	0.483102	2.55645	2.8389	ELANE
GO_Cellular_Component_2023	Endocytic Vesicle Membrane (GO:0030666)	0.329398	0.483102	2.55645	2.8389	TFRC
GO_Cellular_Component_2023	Tertiary Granule (GO:0070820)	0.334455	0.483102	2.50843	2.74736	HBB
GO_Cellular_Component_2023	Membrane Raft (GO:0045121)	0.346111	0.486426	2.40306	2.54964	PRTN3
GO_Cellular_Component_2023	Lysosome (GO:0005764)	0.359317	0.491697	1.61751	1.65561	CTSG;MPO
GO_Cellular_Component_2023	Ficolin-1-Rich Granule (GO:0101002)	0.370417	0.49389	2.20442	2.18926	HBB
GO_Biological_Process_2023	Cellular Component Assembly (GO:0022607)	0.480594	0.494465	1.55157	1.13689	GAS6
GO_Molecular_Function_2023	Transcription Regulatory Region Nucleic Acid Binding (GO:0001067)	0.430988	0.496454	1.80534	1.51951	KLF1
GO_Cellular_Component_2023	Endocytic Vesicle (GO:0030139)	0.389223	0.50599	2.0675	1.9509	HBB
GO_Biological_Process_2023	Positive Regulation Of Apoptotic Process (GO:0043065)	0.493604	0.50699	1.49313	1.05419	IGFBP3
GO_Biological_Process_2023	Monoatomic Cation Transmembrane Transport (GO:0098655)	0.507546	0.520428	1.43367	0.972271	GAS6
GO_Biological_Process_2023	Transmembrane Receptor Protein Tyrosine Kinase Signaling Pathway (GO:0007169)	0.511283	0.523374	1.41826	0.951414	MMP2
GO_Biological_Process_2023	Protein Transport (GO:0015031)	0.546002	0.557971	1.28454	0.777316	TFRC
GO_Biological_Process_2023	Positive Regulation Of Cytokine Production (GO:0001819)	0.554013	0.565205	1.2559	0.741695	ELANE
GO_Cellular_Component_2023	Vesicle (GO:0031982)	0.446618	0.566443	1.71952	1.38602	TFRC
GO_Molecular_Function_2023	ATP Binding (GO:0005524)	0.50504	0.574482	1.44413	0.986515	EPB42
GO_Molecular_Function_2023	Adenyl Ribonucleotide Binding (GO:0032559)	0.541361	0.608195	1.30148	0.798681	EPB42
GO_Biological_Process_2023	Positive Regulation Of DNA-templated Transcription (GO:0045893)	0.608431	0.61968	0.963109	0.478541	GREM1;PF4;KLF1
GO_Biological_Process_2023	Positive Regulation Of Multicellular Organismal Process (GO:0051240)	0.62401	0.634479	1.03437	0.487796	GAS6
GO_Biological_Process_2023	Organelle Organization (GO:0006996)	0.652636	0.662475	0.955954	0.40794	ANK1
GO_Biological_Process_2023	Nervous System Development (GO:0007399)	0.66571	0.674615	0.922052	0.375185	NRGN
GO_Biological_Process_2023	Regulation Of Nucleic Acid-Templated Transcription (GO:1903506)	0.681579	0.689544	0.882348	0.338242	KLF1
GO_Biological_Process_2023	Negative Regulation Of Nucleic Acid-Templated Transcription (GO:1903507)	0.684824	0.691673	0.874411	0.331046	GAS6
GO_Biological_Process_2023	Positive Regulation Of Transcription By RNA Polymerase II (GO:0045944)	0.687007	0.692723	0.846421	0.317755	GREM1;PF4
GO_Cellular_Component_2023	Mitochondrial Matrix (GO:0005759)	0.592037	0.717173	1.12971	0.592181	ALAS2
GO_Cellular_Component_2023	Endosome Membrane (GO:0010008)	0.598228	0.717173	1.11054	0.570579	TFRC
GO_Cellular_Component_2023	Mitochondrial Inner Membrane (GO:0005743)	0.607343	0.717173	1.08296	0.540031	ALAS2
GO_Cellular_Component_2023	Cytoplasmic Vesicle Membrane (GO:0030659)	0.625924	0.717173	1.02893	0.48208	TFRC
GO_Cellular_Component_2023	Organelle Inner Membrane (GO:0019866)	0.634423	0.717173	1.00514	0.457379	ALAS2
GO_Biological_Process_2023	Negative Regulation Of DNA-templated Transcription (GO:0045892)	0.733755	0.73863	0.770894	0.238654	GAS6;ELANE
GO_Molecular_Function_2023	Transition Metal Ion Binding (GO:0046914)	0.684824	0.750025	0.874411	0.331046	SOD3
GO_Molecular_Function_2023	Kinase Binding (GO:0019900)	0.688038	0.750025	0.866613	0.324037	TFRC
GO_Molecular_Function_2023	Purine Ribonucleoside Triphosphate Binding (GO:0035639)	0.700572	0.750025	0.836735	0.297758	EPB42
GO_Molecular_Function_2023	Transcription Cis-Regulatory Region Binding (GO:0000976)	0.699033	0.750025	0.840359	0.300897	KLF1
GO_Biological_Process_2023	Positive Regulation Of Nucleic Acid-Templated Transcription (GO:1903508)	0.756834	0.7606	0.711863	0.198333	KLF1
GO_Biological_Process_2023	Regulation Of Transcription By RNA Polymerase II (GO:0006357)	0.760032	0.762548	0.77015	0.211325	GREM1;ELANE;PF4;KLF1
GO_Molecular_Function_2023	Protein Kinase Binding (GO:0019901)	0.726296	0.768523	0.777911	0.248774	TFRC
GO_Molecular_Function_2023	Cis-Regulatory Region Sequence-Specific DNA Binding (GO:0000987)	0.768398	0.803727	0.716773	0.188832	ZNF552;KLF1
GO_Molecular_Function_2023	RNA Polymerase II Cis-Regulatory Region Sequence-Specific DNA Binding (GO:0000978)	0.778924	0.805479	0.700521	0.175019	ZNF552;KLF1
GO_Cellular_Component_2023	Mitochondrial Membrane (GO:0031966)	0.745959	0.819904	0.734959	0.215405	ALAS2
GO_Cellular_Component_2023	Neuron Projection (GO:0043005)	0.756834	0.819904	0.711863	0.198333	ANK1
GO_Molecular_Function_2023	RNA Polymerase II Transcription Regulatory Region Sequence-Specific DNA Binding (GO:0000977)	0.819583	0.838001	0.638014	0.126939	ZNF552;KLF1
GO_Molecular_Function_2023	Sequence-Specific Double-Stranded DNA Binding (GO:1990837)	0.838379	0.847694	0.54982	0.096925	KLF1
GO_Cellular_Component_2023	Intracellular Non-Membrane-Bounded Organelle (GO:0043232)	0.808469	0.857967	0.655106	0.139284	EPB42;ANK1
GO_Biological_Process_2023	Negative Regulation Of Transcription By RNA Polymerase II (GO:0000122)	0.857336	0.858753	0.5139	0.0791023	ELANE
GO_Cellular_Component_2023	Bounding Membrane Of Organelle (GO:0098588)	0.87671	0.911778	0.477321	0.0628057	TFRC
GO_Biological_Process_2023	Regulation Of DNA-templated Transcription (GO:0006355)	0.959762	0.959762	0.391276	0.0160696	GAS6;KLF1
GO_Molecular_Function_2023	RNA Binding (GO:0003723)	0.974337	0.974337	0.268346	0.00697653	TFRC
GO_Cellular_Component_2023	Intracellular Membrane-Bounded Organelle (GO:0043231)	0.986181	0.993341	0.465629	0.00647943	GAMT;TFRC;IGFBP3;CTSG;PRTN3;MPO;KLF1
GO_Cellular_Component_2023	Nucleus (GO:0005634)	0.993341	0.993341	0.38346	0.0025621	GAMT;IGFBP3;CTSG;MPO;KLF1

## Sheet: Mock_d0_v_EPOR(iEPOR)_d14
Gene_set	Term	P-value	Adjusted P-value	Odds Ratio	Combined Score	Genes
GO_Biological_Process_2023	Hydrogen Peroxide Catabolic Process (GO:0042744)	1.62541e-07	4.37234e-05	108.337	1693.56	HBM;HBB;HBA1;MPO		P<0.01
GO_Biological_Process_2023	Erythrocyte Differentiation (GO:0030218)	6.739e-06	0.000906396	38.4638	458.011	ALAS2;TSPO2;AHSP;KLF1		P<0.05
GO_Cellular_Component_2023	Endocytic Vesicle Lumen (GO:0071682)	1.8942e-05	0.00123123	70.6809	768.593	HBB;HBA1;MPO
GO_Biological_Process_2023	One-Carbon Compound Transport (GO:0019755)	9.09461e-05	0.00815483	39.7301	369.698	HBB;SLC4A1;HBA1
GO_Cellular_Component_2023	Collagen-Containing Extracellular Matrix (GO:0062023)	0.000321321	0.0104429	7.27632	58.5239	LGALS1;MMP2;IGFBP7;TGFBI;TPSAB1;SOD3
GO_Biological_Process_2023	Extracellular Matrix Disassembly (GO:0022617)	0.000181142	0.0111308	30.9948	267.058	MMP2;CAPG;TPSAB1
GO_Biological_Process_2023	Cellular Component Disassembly (GO:0022411)	0.000206893	0.0111308	29.5502	250.684	MMP2;CAPG;TPSAB1
GO_Biological_Process_2023	Oxygen Transport (GO:0015671)	0.000272123	0.0122002	103.865	852.651	HBB;HBA1
GO_Biological_Process_2023	Carbon Dioxide Transport (GO:0015670)	0.000332064	0.0127607	92.3194	739.496	HBB;HBA1
GO_Biological_Process_2023	Myeloid Cell Differentiation (GO:0030099)	0.000391159	0.0131527	23.5177	184.529	ALAS2;AHSP;KLF1
GO_Cellular_Component_2023	Cytoskeleton (GO:0005856)	0.00068149	0.0147656	5.32315	38.8123	EPB42;SLC4A1;CAPG;VIM;ANK1;MYO1F;EML3
GO_Biological_Process_2023	Gas Transport (GO:0015669)	0.000629902	0.0188271	63.9006	470.944	HBB;HBA1
GO_Cellular_Component_2023	Azurophil Granule Lumen (GO:0035578)	0.00143529	0.0233235	14.7432	96.5147	PRSS57;RNASE2;MPO
GO_Biological_Process_2023	Extracellular Matrix Organization (GO:0030198)	0.000973382	0.026184	9.99899	69.3403	MMP2;CAPG;TGFBI;TPSAB1
GO_Cellular_Component_2023	Azurophil Granule (GO:0042582)	0.00685512	0.0824211	8.31383	41.4258	PRSS57;RNASE2;MPO
GO_Cellular_Component_2023	Vacuolar Lumen (GO:0005775)	0.0076081	0.0824211	7.99569	39.0073	PRSS57;RNASE2;MPO
GO_Cellular_Component_2023	Actin Cytoskeleton (GO:0015629)	0.00894865	0.0830946	5.28389	24.9201	TMOD1;CAPG;FHDC1;MYO1F
GO_Cellular_Component_2023	Actin Filament (GO:0005884)	0.0136374	0.098492	12.0054	51.5627	TMOD1;FHDC1
GO_Cellular_Component_2023	Endocytic Vesicle (GO:0030139)	0.0129599	0.098492	6.53412	28.3966	STAB1;HBB;HBA1
GO_Molecular_Function_2023	Heme Binding (GO:0020037)	0.00134433	0.106202	15.0957	99.8109	HBM;HBB;HBA1
GO_Cellular_Component_2023	Cytolytic Granule (GO:0044194)	0.0173717	0.112916	67.8367	274.936	NKG7
GO_Cellular_Component_2023	Intracellular Organelle Lumen (GO:0070013)	0.019322	0.114175	3.06417	12.0928	ALAS2;LGALS1;HBB;IGFBP7;HBA1;SOD3
GO_Cellular_Component_2023	Intracellular Non-Membrane-Bounded Organelle (GO:0043232)	0.0281848	0.132513	2.57094	9.17562	SELENBP1;ARL4A;EPB42;CAPG;VIM;ANK1;EML3
GO_Cellular_Component_2023	Polymeric Cytoskeletal Fiber (GO:0099513)	0.0285412	0.132513	4.79649	17.0583	TMOD1;VIM;FHDC1
GO_Cellular_Component_2023	Primary Lysosome (GO:0005766)	0.0247259	0.132513	45.2177	167.301	MPO
GO_Cellular_Component_2023	Mitotic Spindle Microtubule (GO:1990498)	0.0320262	0.13878	33.9082	116.685	EML3
GO_Molecular_Function_2023	Chloride Transmembrane Transporter Activity (GO:0015108)	0.00835883	0.14038	15.6423	74.8396	SLC4A1;CLIC2
GO_Molecular_Function_2023	Serine-Type Peptidase Activity (GO:0008236)	0.00538205	0.14038	9.09735	47.5308	MMP2;PRSS57;TPSAB1
GO_Molecular_Function_2023	Arylesterase Activity (GO:0004064)	0.0124388	0.14038	101.765	446.438	CA1
GO_Molecular_Function_2023	Hydrolase Activity, Acting On Acid Anhydrides, In Phosphorus-Containing Anhydrides (GO:0016818)	0.0124388	0.14038	101.765	446.438	PHOSPHO1
GO_Molecular_Function_2023	Keratin Filament Binding (GO:1990254)	0.0124388	0.14038	101.765	446.438	VIM
GO_Molecular_Function_2023	Actin Binding (GO:0003779)	0.0107774	0.14038	7.01064	31.7603	TMOD1;FHDC1;MYO1F
GO_Biological_Process_2023	Response To Hydrogen Peroxide (GO:0042542)	0.00590974	0.143018	18.8504	96.7242	HBB;HBA1
GO_Biological_Process_2023	Positive Regulation Of Cell Death (GO:0010942)	0.0069503	0.143018	17.276	85.8441	HBB;HBA1
GO_Biological_Process_2023	Actin Polymerization Or Depolymerization (GO:0008154)	0.00778121	0.143018	16.2574	78.9464	CAPG;FHDC1
GO_Biological_Process_2023	Monoatomic Anion Transport (GO:0006820)	0.00895516	0.143018	15.072	71.0723	SLC4A1;CLIC2
GO_Biological_Process_2023	Inorganic Anion Transport (GO:0015698)	0.00926028	0.143018	14.8021	69.3037	SLC4A1;CLIC2
GO_Biological_Process_2023	Nitrogen Compound Transport (GO:0071705)	0.00786954	0.143018	7.89495	38.2491	HBB;HBA1;RHCE
GO_Biological_Process_2023	Proteolysis (GO:0006508)	0.00923269	0.143018	5.23446	24.5235	MMP2;ANPEP;PRSS57;TPSAB1
GO_Biological_Process_2023	Regulation Of Cell Death (GO:0010941)	0.00957001	0.143018	14.5417	67.606	HBB;HBA1
GO_Molecular_Function_2023	Phosphatase Activity (GO:0016791)	0.0183241	0.144761	10.2207	40.878	PHOSPHO1;LPIN2
GO_Molecular_Function_2023	Oxidoreductase Activity, Acting On A Sulfur Group Of Donors, Oxygen As Acceptor (GO:0016670)	0.0149083	0.144761	81.4082	342.39	SELENBP1
GO_Molecular_Function_2023	G Protein-Coupled Glutamate Receptor Binding (GO:0035256)	0.0173717	0.144761	67.8367	274.936	HOMER3
GO_Biological_Process_2023	CD4-positive, Alpha-Beta T Cell Activation (GO:0035710)	0.0124388	0.14548	101.765	446.438	NKG7
GO_Biological_Process_2023	Natural Killer Cell Degranulation (GO:0043320)	0.0124388	0.14548	101.765	446.438	NKG7
GO_Biological_Process_2023	Induction Of Bacterial Agglutination (GO:0043152)	0.0124388	0.14548	101.765	446.438	RNASE2
GO_Biological_Process_2023	Ammonium Homeostasis (GO:0097272)	0.0124388	0.14548	101.765	446.438	RHCE
GO_Biological_Process_2023	Response To Reactive Oxygen Species (GO:0000302)	0.0118651	0.14548	12.9466	57.4073	HBB;HBA1
GO_Biological_Process_2023	Alpha-Beta T Cell Activation (GO:0046631)	0.0368633	0.155057	29.0612	95.9177	NKG7
GO_Biological_Process_2023	Defense Response To Protozoan (GO:0042832)	0.0368633	0.155057	29.0612	95.9177	NKG7
GO_Biological_Process_2023	Intracellular Sterol Transport (GO:0032366)	0.0368633	0.155057	29.0612	95.9177	TSPO2
GO_Biological_Process_2023	Positive Regulation Of Collagen Biosynthetic Process (GO:0032967)	0.0368633	0.155057	29.0612	95.9177	VIM
GO_Biological_Process_2023	Intracellular Cholesterol Transport (GO:0032367)	0.0392729	0.155057	27.1224	87.8013	TSPO2
GO_Biological_Process_2023	Positive Regulation Of Collagen Metabolic Process (GO:0010714)	0.0392729	0.155057	27.1224	87.8013	VIM
GO_Biological_Process_2023	Regulation Of Cardiac Muscle Contraction By Regulation Of The Release Of Sequestered Calcium Ion (GO:0010881)	0.0392729	0.155057	27.1224	87.8013	CLIC2
GO_Biological_Process_2023	Triglyceride Biosynthetic Process (GO:0019432)	0.0416767	0.155057	25.426	80.7992	LPIN2
GO_Biological_Process_2023	Regulation Of Collagen Biosynthetic Process (GO:0032965)	0.0440745	0.155057	23.9292	74.7039	VIM
GO_Biological_Process_2023	Vesicle Transport Along Actin Filament (GO:0030050)	0.0440745	0.155057	23.9292	74.7039	MYO1F
GO_Biological_Process_2023	Actin Filament Capping (GO:0051693)	0.0440745	0.155057	23.9292	74.7039	CAPG
GO_Biological_Process_2023	Renal Absorption (GO:0070293)	0.0440745	0.155057	23.9292	74.7039	HBB
GO_Biological_Process_2023	Neuromuscular Synaptic Transmission (GO:0007274)	0.0440745	0.155057	23.9292	74.7039	TSPOAP1
GO_Biological_Process_2023	Barbed-End Actin Filament Capping (GO:0051016)	0.0440745	0.155057	23.9292	74.7039	CAPG
GO_Biological_Process_2023	Heme Biosynthetic Process (GO:0006783)	0.0464665	0.155057	22.5986	69.3558	ALAS2
GO_Biological_Process_2023	Bicarbonate Transport (GO:0015701)	0.0464665	0.155057	22.5986	69.3558	SLC4A1
GO_Biological_Process_2023	Cell Projection Organization (GO:0030030)	0.0488525	0.155057	21.4082	64.6301	CAPG
GO_Biological_Process_2023	Monocarboxylic Acid Catabolic Process (GO:0072329)	0.0488525	0.155057	21.4082	64.6301	LPIN2
GO_Biological_Process_2023	Actin Filament-Based Transport (GO:0099515)	0.0488525	0.155057	21.4082	64.6301	MYO1F
GO_Biological_Process_2023	Regulation Of Mitotic Spindle Assembly (GO:1901673)	0.0488525	0.155057	21.4082	64.6301	EML3
GO_Biological_Process_2023	Intracellular Monoatomic Ion Homeostasis (GO:0006873)	0.0488525	0.155057	21.4082	64.6301	SLC4A1
GO_Biological_Process_2023	Positive Regulation Of Vascular Associated Smooth Muscle Cell Proliferation (GO:1904707)	0.0488525	0.155057	21.4082	64.6301	MMP2
GO_Biological_Process_2023	Regulation Of Cardiac Muscle Contraction By Calcium Ion Signaling (GO:0010882)	0.0488525	0.155057	21.4082	64.6301	CLIC2
GO_Biological_Process_2023	Peptide Catabolic Process (GO:0043171)	0.0512328	0.155057	20.3367	60.4281	ANPEP
GO_Biological_Process_2023	Negative Regulation Of Interleukin-2 Production (GO:0032703)	0.0512328	0.155057	20.3367	60.4281	HOMER3
GO_Biological_Process_2023	Porphyrin-Containing Compound Biosynthetic Process (GO:0006779)	0.0512328	0.155057	20.3367	60.4281	ALAS2
GO_Biological_Process_2023	Innate Immune Response In Mucosa (GO:0002227)	0.0512328	0.155057	20.3367	60.4281	RNASE2
GO_Biological_Process_2023	Regulation Of Release Of Sequestered Calcium Ion Into Cytosol By Sarcoplasmic Reticulum (GO:0010880)	0.0536072	0.155057	19.3673	56.6702	CLIC2
GO_Biological_Process_2023	Acylglycerol Biosynthetic Process (GO:0046463)	0.0536072	0.155057	19.3673	56.6702	LPIN2
GO_Biological_Process_2023	Natural Killer Cell Activation Involved In Immune Response (GO:0002323)	0.0536072	0.155057	19.3673	56.6702	NKG7
GO_Biological_Process_2023	Natural Killer Cell Mediated Immunity (GO:0002228)	0.0536072	0.155057	19.3673	56.6702	NKG7
GO_Biological_Process_2023	Positive Regulation Of Viral Life Cycle (GO:1903902)	0.0536072	0.155057	19.3673	56.6702	LGALS1
GO_Biological_Process_2023	Negative Regulation Of Cell Adhesion (GO:0007162)	0.0140048	0.155057	11.8333	50.5089	PLXND1;TGFBI
GO_Biological_Process_2023	Chloride Transport (GO:0006821)	0.0159058	0.155057	11.0417	45.7243	SLC4A1;CLIC2
GO_Biological_Process_2023	Actomyosin Structure Organization (GO:0031032)	0.0159058	0.155057	11.0417	45.7243	TMOD1;FHDC1
GO_Biological_Process_2023	Positive Regulation Of Inflammatory Response (GO:0050729)	0.027901	0.155057	8.10784	29.0187	LGALS1;NKG7
GO_Biological_Process_2023	Positive Regulation Of Leukocyte Differentiation (GO:1902107)	0.0173717	0.155057	67.8367	274.936	LGALS1
GO_Biological_Process_2023	Extracellular Structure Organization (GO:0043062)	0.0304217	0.155057	7.72702	26.9874	MMP2;TGFBI
GO_Biological_Process_2023	External Encapsulating Structure Organization (GO:0045229)	0.0309363	0.155057	7.65509	26.6078	MMP2;TGFBI
GO_Biological_Process_2023	Defense Response To Bacterium (GO:0042742)	0.0144198	0.155057	6.27151	26.5859	STAB1;RNASE2;MPO
GO_Biological_Process_2023	Cytoskeleton Organization (GO:0007010)	0.0314545	0.155057	7.58448	26.2363	ANK1;ARHGAP4
GO_Biological_Process_2023	Cellular Response To Muramyl Dipeptide (GO:0071225)	0.0198292	0.155057	58.1429	227.955	VIM
GO_Biological_Process_2023	Semaphorin-Plexin Signaling Pathway Involved In Axon Guidance (GO:1902287)	0.0198292	0.155057	58.1429	227.955	PLXND1
GO_Biological_Process_2023	Positive Regulation Of Defense Response (GO:0031349)	0.0384971	0.155057	6.77186	22.0571	LGALS1;NKG7
GO_Biological_Process_2023	Regulation Of Store-Operated Calcium Entry (GO:2001256)	0.0222806	0.155057	50.8724	193.521	HOMER3
GO_Biological_Process_2023	Protein Localization To Plasma Membrane (GO:0072659)	0.0460803	0.155057	6.11574	18.8204	ANK1;PRAM1
GO_Biological_Process_2023	Protein Localization To Cell Periphery (GO:1990778)	0.0491322	0.155057	5.89583	17.7656	ANK1;PRAM1
GO_Biological_Process_2023	Actin Filament Organization (GO:0007015)	0.0503732	0.155057	5.81221	17.3686	CAPG;MYO1F
GO_Biological_Process_2023	Regulation Of Cell Adhesion (GO:0030155)	0.0503732	0.155057	5.81221	17.3686	PLXND1;TGFBI
GO_Biological_Process_2023	Regulation Of Dendritic Cell Differentiation (GO:2001198)	0.0247259	0.155057	45.2177	167.301	LGALS1
GO_Biological_Process_2023	Cellular Response To UV-A (GO:0071492)	0.0247259	0.155057	45.2177	167.301	MMP2
GO_Biological_Process_2023	Removal Of Superoxide Radicals (GO:0019430)	0.0247259	0.155057	45.2177	167.301	SOD3
GO_Biological_Process_2023	Ammonium Transmembrane Transport (GO:0072488)	0.0247259	0.155057	45.2177	167.301	RHCE
GO_Biological_Process_2023	Erythrocyte Development (GO:0048821)	0.0271653	0.155057	40.6939	146.735	ALAS2
GO_Biological_Process_2023	Cellular Response To Superoxide (GO:0071451)	0.0271653	0.155057	40.6939	146.735	SOD3
GO_Biological_Process_2023	Negative Regulation Of Release Of Sequestered Calcium Ion Into Cytosol (GO:0051280)	0.0271653	0.155057	40.6939	146.735	CLIC2
GO_Biological_Process_2023	Negative Regulation Of Ryanodine-Sensitive Calcium-Release Channel Activity (GO:0060315)	0.0271653	0.155057	40.6939	146.735	CLIC2
GO_Biological_Process_2023	Negative Regulation Of calcineurin-NFAT Signaling Cascade (GO:0070885)	0.0271653	0.155057	40.6939	146.735	HOMER3
GO_Biological_Process_2023	Negative Regulation Of Calcineurin-Mediated Signaling (GO:0106057)	0.0271653	0.155057	40.6939	146.735	HOMER3
GO_Biological_Process_2023	G Protein-Coupled Glutamate Receptor Signaling Pathway (GO:0007216)	0.0295988	0.155057	36.9926	130.215	HOMER3
GO_Biological_Process_2023	Positive Regulation By Symbiont Of Entry Into Host (GO:0075294)	0.0295988	0.155057	36.9926	130.215	LGALS1
GO_Biological_Process_2023	Response To Muramyl Dipeptide (GO:0032495)	0.0295988	0.155057	36.9926	130.215	VIM
GO_Biological_Process_2023	Semaphorin-Plexin Signaling Pathway Involved In Neuron Projection Guidance (GO:1902285)	0.0295988	0.155057	36.9926	130.215	PLXND1
GO_Biological_Process_2023	Positive Regulation Of Viral Entry Into Host Cell (GO:0046598)	0.0295988	0.155057	36.9926	130.215	LGALS1
GO_Biological_Process_2023	Low-Density Lipoprotein Particle Remodeling (GO:0034374)	0.0295988	0.155057	36.9926	130.215	MPO
GO_Biological_Process_2023	Supramolecular Fiber Organization (GO:0097435)	0.0444118	0.155057	4.00455	12.4712	TMOD1;VIM;MYO1F
GO_Biological_Process_2023	Response To UV-A (GO:0070141)	0.0320262	0.155057	33.9082	116.685	MMP2
GO_Biological_Process_2023	Stress Fiber Assembly (GO:0043149)	0.0344477	0.155057	31.2983	105.422	FHDC1
GO_Biological_Process_2023	Striated Muscle Cell Development (GO:0055002)	0.0344477	0.155057	31.2983	105.422	TMOD1
GO_Biological_Process_2023	Contractile Actin Filament Bundle Assembly (GO:0030038)	0.0344477	0.155057	31.2983	105.422	FHDC1
GO_Biological_Process_2023	Cellular Lipid Catabolic Process (GO:0044242)	0.0559758	0.160186	18.4861	53.2924	LPIN2
GO_Biological_Process_2023	Regulation Of Ryanodine-Sensitive Calcium-Release Channel Activity (GO:0060314)	0.0583386	0.161784	17.6815	50.2417	CLIC2
GO_Biological_Process_2023	Natural Killer Cell Mediated Cytotoxicity (GO:0042267)	0.0583386	0.161784	17.6815	50.2417	NKG7
GO_Biological_Process_2023	Positive Regulation Of Response To External Stimulus (GO:0032103)	0.0573977	0.161784	5.39134	15.4071	LGALS1;NKG7
GO_Molecular_Function_2023	Ammonium Transmembrane Transporter Activity (GO:0008519)	0.0247259	0.162779	45.2177	167.301	RHCE
GO_Molecular_Function_2023	Semaphorin Receptor Activity (GO:0017154)	0.0247259	0.162779	45.2177	167.301	PLXND1
GO_Molecular_Function_2023	Low-Density Lipoprotein Particle Binding (GO:0030169)	0.0392729	0.165804	27.1224	87.8013	STAB1
GO_Molecular_Function_2023	Phosphatidylinositol 3-Kinase Regulator Activity (GO:0035014)	0.0416767	0.165804	25.426	80.7992	CISH
GO_Molecular_Function_2023	Glutamate Receptor Binding (GO:0035254)	0.0440745	0.165804	23.9292	74.7039	HOMER3
GO_Molecular_Function_2023	Ankyrin Binding (GO:0030506)	0.0440745	0.165804	23.9292	74.7039	SLC4A1
GO_Molecular_Function_2023	Metallopeptidase Activity (GO:0008237)	0.0384971	0.165804	6.77186	22.0571	MMP2;ANPEP
GO_Molecular_Function_2023	Serine-Type Endopeptidase Activity (GO:0004252)	0.0390617	0.165804	6.71646	21.7789	MMP2;TPSAB1
GO_Molecular_Function_2023	Phosphatidate Phosphatase Activity (GO:0008195)	0.0320262	0.165804	33.9082	116.685	LPIN2
GO_Molecular_Function_2023	1-Phosphatidylinositol-3-Kinase Regulator Activity (GO:0046935)	0.0344477	0.165804	31.2983	105.422	CISH
GO_Molecular_Function_2023	Solute:Inorganic Anion Antiporter Activity (GO:0005452)	0.0344477	0.165804	31.2983	105.422	SLC4A1
GO_Biological_Process_2023	Nucleic Acid Phosphodiester Bond Hydrolysis (GO:0090305)	0.0630467	0.171885	16.2653	44.9553	RNASE2
GO_Biological_Process_2023	Peptide Cross-Linking (GO:0018149)	0.0653922	0.171885	15.6389	42.6529	EPB42
GO_Biological_Process_2023	Positive Regulation Of Nitric Oxide Biosynthetic Process (GO:0045429)	0.0653922	0.171885	15.6389	42.6529	HBB
GO_Biological_Process_2023	Myeloid Cell Development (GO:0061515)	0.0653922	0.171885	15.6389	42.6529	ALAS2
GO_Biological_Process_2023	Amino Acid Import Across Plasma Membrane (GO:0089718)	0.0653922	0.171885	15.6389	42.6529	TSPO2
GO_Biological_Process_2023	RNA Phosphodiester Bond Hydrolysis (GO:0090501)	0.0677318	0.171885	15.059	40.5417	RNASE2
GO_Biological_Process_2023	Positive Regulation Of Nitric Oxide Metabolic Process (GO:1904407)	0.0677318	0.171885	15.059	40.5417	HBB
GO_Biological_Process_2023	Mucosal Immune Response (GO:0002385)	0.0677318	0.171885	15.059	40.5417	RNASE2
GO_Biological_Process_2023	Negative Regulation Of Cation Channel Activity (GO:2001258)	0.0677318	0.171885	15.059	40.5417	CLIC2
GO_Biological_Process_2023	Positive Regulation Of Cellular Biosynthetic Process (GO:0031328)	0.070273	0.173426	4.79118	12.7224	HBB;VIM
GO_Biological_Process_2023	Regulation Of Spindle Assembly (GO:0090169)	0.0700658	0.173426	14.5204	38.5999	EML3
GO_Biological_Process_2023	Lipid Droplet Organization (GO:0034389)	0.0700658	0.173426	14.5204	38.5999	TSPO2
GO_Biological_Process_2023	Regulation Of Vasculature Development (GO:1901342)	0.072394	0.175441	14.019	36.8087	PLXND1
GO_Biological_Process_2023	Negative Regulation Of Calcium Ion Transmembrane Transporter Activity (GO:1901020)	0.072394	0.175441	14.019	36.8087	CLIC2
GO_Biological_Process_2023	Organic Cation Transport (GO:0015695)	0.0747165	0.176305	13.551	35.1521	TSPO2
GO_Biological_Process_2023	Actin Filament Polymerization (GO:0030041)	0.0747165	0.176305	13.551	35.1521	FHDC1
GO_Biological_Process_2023	Endodermal Cell Differentiation (GO:0035987)	0.0747165	0.176305	13.551	35.1521	MMP2
GO_Cellular_Component_2023	Secretory Granule Lumen (GO:0034774)	0.0444118	0.180423	4.00455	12.4712	PRSS57;RNASE2;MPO
GO_Biological_Process_2023	Superoxide Metabolic Process (GO:0006801)	0.0816498	0.186632	12.3173	30.8586	SOD3
GO_Biological_Process_2023	Regulation Of calcineurin-NFAT Signaling Cascade (GO:0070884)	0.0816498	0.186632	12.3173	30.8586	HOMER3
GO_Biological_Process_2023	Semaphorin-Plexin Signaling Pathway (GO:0071526)	0.0816498	0.186632	12.3173	30.8586	PLXND1
GO_Biological_Process_2023	Glutamate Receptor Signaling Pathway (GO:0007215)	0.0839496	0.186632	11.9544	29.6174	HOMER3
GO_Biological_Process_2023	Platelet Aggregation (GO:0070527)	0.0839496	0.186632	11.9544	29.6174	HBB
GO_Biological_Process_2023	Endoderm Formation (GO:0001706)	0.0839496	0.186632	11.9544	29.6174	MMP2
GO_Biological_Process_2023	Protein Localization To Membrane (GO:0072657)	0.0832524	0.186632	4.33333	10.7721	ANK1;PRAM1
GO_Cellular_Component_2023	Mitotic Spindle (GO:0072686)	0.0497513	0.190225	5.85372	17.5654	CAPG;EML3
GO_Biological_Process_2023	Organelle Organization (GO:0006996)	0.0865742	0.190889	3.00461	7.35155	TSPO2;ANK1;ARHGAP4
GO_Molecular_Function_2023	Bicarbonate Transmembrane Transporter Activity (GO:0015106)	0.0536072	0.192031	19.3673	56.6702	SLC4A1
GO_Molecular_Function_2023	Lipoprotein Particle Binding (GO:0071813)	0.0559758	0.192031	18.4861	53.2924	STAB1
GO_Molecular_Function_2023	Monoatomic Anion Transmembrane Transporter Activity (GO:0008509)	0.0583386	0.192031	17.6815	50.2417	SLC4A1
GO_Biological_Process_2023	Regulation Of Vascular Associated Smooth Muscle Cell Proliferation (GO:1904705)	0.0885322	0.193619	11.2891	27.3692	MMP2
GO_Biological_Process_2023	Positive Regulation Of Axonogenesis (GO:0050772)	0.0908151	0.194123	10.9835	26.3485	PLXND1
GO_Biological_Process_2023	Response To Peptide (GO:1901652)	0.0908151	0.194123	10.9835	26.3485	MMP2
GO_Biological_Process_2023	Vesicle Cytoskeletal Trafficking (GO:0099518)	0.0930924	0.194123	10.6939	25.389	MYO1F
GO_Biological_Process_2023	Regulation Of Mitotic Spindle Organization (GO:0060236)	0.0930924	0.194123	10.6939	25.389	EML3
GO_Biological_Process_2023	Regulation Of Nitric Oxide Biosynthetic Process (GO:0045428)	0.0930924	0.194123	10.6939	25.389	HBB
GO_Biological_Process_2023	Regulation Of Angiogenesis (GO:0045765)	0.0930487	0.194123	4.05316	9.62477	PLXND1;STAB1
GO_Biological_Process_2023	Endothelial Cell Migration (GO:0043542)	0.0953641	0.19733	10.4192	24.4856	PLXND1
GO_Biological_Process_2023	Regulation Of Axonogenesis (GO:0050770)	0.0998908	0.20498	9.90991	22.8292	PLXND1
GO_Biological_Process_2023	Response To Amyloid-Beta (GO:1904645)	0.102146	0.20498	9.67347	22.0686	MMP2
GO_Biological_Process_2023	Ephrin Receptor Signaling Pathway (GO:0048013)	0.102146	0.20498	9.67347	22.0686	MMP2
GO_Biological_Process_2023	Phosphatidylinositol Phosphate Biosynthetic Process (GO:0046854)	0.104395	0.20498	9.44803	21.3485	CISH
GO_Biological_Process_2023	Regulation Of Viral Entry Into Host Cell (GO:0046596)	0.104395	0.20498	9.44803	21.3485	LGALS1
GO_Biological_Process_2023	Positive Regulation Of Biosynthetic Process (GO:0009891)	0.104395	0.20498	9.44803	21.3485	VIM
GO_Biological_Process_2023	Nucleobase-Containing Compound Catabolic Process (GO:0034655)	0.104395	0.20498	9.44803	21.3485	RNASE2
GO_Biological_Process_2023	Triglyceride Metabolic Process (GO:0006641)	0.106639	0.206254	9.23284	20.6659	LPIN2
GO_Biological_Process_2023	Epithelial Cell Migration (GO:0010631)	0.108878	0.206254	9.02721	20.0181	PLXND1
GO_Biological_Process_2023	Myofibril Assembly (GO:0030239)	0.108878	0.206254	9.02721	20.0181	TMOD1
GO_Biological_Process_2023	Homotypic Cell-Cell Adhesion (GO:0034109)	0.108878	0.206254	9.02721	20.0181	HBB
GO_Biological_Process_2023	Regulation Of mRNA Catabolic Process (GO:0061013)	0.108878	0.206254	9.02721	20.0181	VIM
GO_Biological_Process_2023	Regulation Of Interleukin-2 Production (GO:0032663)	0.111111	0.207561	8.83052	19.4027	HOMER3
GO_Biological_Process_2023	Positive Regulation Of Smooth Muscle Cell Proliferation (GO:0048661)	0.111111	0.207561	8.83052	19.4027	MMP2
GO_Biological_Process_2023	Chloride Transmembrane Transport (GO:1902476)	0.113338	0.210262	8.64221	18.8174	SLC4A1
GO_Biological_Process_2023	Antibacterial Humoral Response (GO:0019731)	0.11556	0.211467	8.46173	18.2601	RNASE2
GO_Biological_Process_2023	Regulation Of Cell Communication (GO:0010646)	0.11556	0.211467	8.46173	18.2601	IGFBP7
GO_Biological_Process_2023	Regulation Of Release Of Sequestered Calcium Ion Into Cytosol (GO:0051279)	0.119988	0.212346	8.12245	17.2226	CLIC2
GO_Biological_Process_2023	Metaphase Plate Congression (GO:0051310)	0.119988	0.212346	8.12245	17.2226	EML3
GO_Biological_Process_2023	Cholesterol Transport (GO:0030301)	0.119988	0.212346	8.12245	17.2226	TSPO2
GO_Biological_Process_2023	Mitotic Metaphase Plate Congression (GO:0007080)	0.117777	0.212346	8.28863	17.7291	EML3
GO_Biological_Process_2023	Intracellular Iron Ion Homeostasis (GO:0006879)	0.117777	0.212346	8.28863	17.7291	ALAS2
GO_Biological_Process_2023	Regulation Of Inflammatory Response (GO:0050727)	0.120927	0.21261	3.45098	7.29044	LGALS1;NKG7
GO_Molecular_Function_2023	Glutathione Transferase Activity (GO:0004364)	0.0677318	0.212892	15.059	40.5417	CLIC2
GO_Molecular_Function_2023	Aminopeptidase Activity (GO:0004177)	0.0700658	0.212892	14.5204	38.5999	ANPEP
GO_Biological_Process_2023	Rho Protein Signal Transduction (GO:0007266)	0.122193	0.213441	7.96279	16.739	ARHGAP4
GO_Molecular_Function_2023	Monocarboxylic Acid Transmembrane Transporter Activity (GO:0008028)	0.0770333	0.217344	13.1132	33.616	TSPO2
GO_Molecular_Function_2023	Inorganic Anion Transmembrane Transporter Activity (GO:0015103)	0.0770333	0.217344	13.1132	33.616	SLC4A1
GO_Biological_Process_2023	Monoatomic Anion Transmembrane Transport (GO:0098656)	0.126588	0.219692	7.66153	15.835	SLC4A1
GO_Biological_Process_2023	Peptide Metabolic Process (GO:0006518)	0.130962	0.224387	7.38219	15.0069	ANPEP
GO_Biological_Process_2023	Cellular Response To Peptide (GO:1901653)	0.130962	0.224387	7.38219	15.0069	VIM
GO_Biological_Process_2023	RNA Catabolic Process (GO:0006401)	0.133141	0.22525	7.25	14.6185	RNASE2
GO_Biological_Process_2023	Regulation Of Calcium Ion Transport (GO:0051924)	0.133141	0.22525	7.25	14.6185	HOMER3
GO_Molecular_Function_2023	Inorganic Cation Transmembrane Transporter Activity (GO:0022890)	0.0839496	0.22869	11.9544	29.6174	RHCE
GO_Biological_Process_2023	Fatty Acid Catabolic Process (GO:0009062)	0.141802	0.236924	6.76531	13.2148	LPIN2
GO_Biological_Process_2023	Positive Regulation Of Organelle Assembly (GO:1902117)	0.141802	0.236924	6.76531	13.2148	CAPG
GO_Molecular_Function_2023	Microtubule Binding (GO:0008017)	0.120103	0.239685	3.46572	7.34526	FHDC1;EML3
GO_Molecular_Function_2023	Translation Initiation Factor Activity (GO:0003743)	0.0976302	0.239685	10.1582	23.6337	EIF1AY
GO_Molecular_Function_2023	Copper Ion Binding (GO:0005507)	0.106639	0.239685	9.23284	20.6659	SOD3
GO_Molecular_Function_2023	Hydro-Lyase Activity (GO:0016836)	0.108878	0.239685	9.02721	20.0181	CA1
GO_Molecular_Function_2023	Pyrophosphatase Activity (GO:0016462)	0.11556	0.239685	8.46173	18.2601	PHOSPHO1
GO_Molecular_Function_2023	Channel Activity (GO:0015267)	0.122193	0.239685	7.96279	16.739	RHCE
GO_Molecular_Function_2023	Phosphoric Ester Hydrolase Activity (GO:0042578)	0.122193	0.239685	7.96279	16.739	PHOSPHO1
GO_Molecular_Function_2023	Exopeptidase Activity (GO:0008238)	0.122193	0.239685	7.96279	16.739	ANPEP
GO_Molecular_Function_2023	Antiporter Activity (GO:0015297)	0.124393	0.239685	7.80926	16.2769	SLC4A1
GO_Molecular_Function_2023	Monoatomic Anion Channel Activity (GO:0005253)	0.124393	0.239685	7.80926	16.2769	CLIC2
GO_Molecular_Function_2023	Cholesterol Binding (GO:0015485)	0.117777	0.239685	8.28863	17.7291	TSPO2
GO_Molecular_Function_2023	Purine Ribonucleoside Triphosphate Binding (GO:0035639)	0.115999	0.239685	2.62836	5.66193	ARL4A;EPB42;MYO1F
GO_Cellular_Component_2023	Basolateral Plasma Membrane (GO:0016323)	0.0681811	0.239699	4.87697	13.0975	SLC4A1;ANK1
GO_Cellular_Component_2023	Myofibril (GO:0030016)	0.0700658	0.239699	14.5204	38.5999	TMOD1
GO_Biological_Process_2023	Protein Polymerization (GO:0051258)	0.146101	0.241111	6.54641	12.5918	FHDC1
GO_Biological_Process_2023	Inorganic Anion Transmembrane Transport (GO:0098661)	0.146101	0.241111	6.54641	12.5918	SLC4A1
GO_Molecular_Function_2023	Amino Acid Transmembrane Transporter Activity (GO:0015171)	0.130962	0.241357	7.38219	15.0069	TSPO2
GO_Molecular_Function_2023	Metalloexopeptidase Activity (GO:0008235)	0.133141	0.241357	7.25	14.6185	ANPEP
GO_Molecular_Function_2023	Nuclease Activity (GO:0004518)	0.135314	0.241357	7.12245	14.246	RNASE2
GO_Molecular_Function_2023	Sterol Binding (GO:0032934)	0.137482	0.241357	6.9993	13.8884	TSPO2
GO_Biological_Process_2023	Negative Regulation Of Cellular Process (GO:0048523)	0.150441	0.246761	2.32082	4.39606	PLXND1;IGFBP7;TGFBI
GO_Molecular_Function_2023	Chloride Channel Activity (GO:0005254)	0.148242	0.252764	6.44218	12.2975	CLIC2
GO_Molecular_Function_2023	Double-Stranded RNA Binding (GO:0003725)	0.150378	0.252764	6.3412	12.014	VIM
GO_Molecular_Function_2023	ATP Binding (GO:0005524)	0.154049	0.253539	2.95924	5.5352	EPB42;MYO1F
GO_Cellular_Component_2023	Microtubule (GO:0005874)	0.0781204	0.253891	4.50068	11.4745	FHDC1;EML3
GO_Biological_Process_2023	Intermediate Filament Organization (GO:0045109)	0.156756	0.255559	6.05635	11.2228	VIM
GO_Molecular_Function_2023	RNA Nuclease Activity (GO:0004540)	0.160981	0.25912	5.88021	10.74	RNASE2
GO_Molecular_Function_2023	ATPase Binding (GO:0051117)	0.16728	0.25912	5.63435	10.0747	ANK1
GO_Molecular_Function_2023	Phosphatidylinositol-4,5-Bisphosphate Binding (GO:0005546)	0.16728	0.25912	5.63435	10.0747	CAPG
GO_Biological_Process_2023	Synapse Assembly (GO:0007416)	0.163086	0.262695	5.79592	10.5108	PLXND1
GO_Biological_Process_2023	Regulation Of Hydrolase Activity (GO:0051336)	0.163086	0.262695	5.79592	10.5108	PLXND1
GO_Biological_Process_2023	Monocarboxylic Acid Transport (GO:0015718)	0.16728	0.267848	5.63435	10.0747	TSPO2
GO_Biological_Process_2023	Regulation Of mRNA Stability (GO:0043488)	0.16937	0.269588	5.55689	9.86721	VIM
GO_Biological_Process_2023	Positive Regulation Of Neurogenesis (GO:0050769)	0.171454	0.269714	5.48152	9.66634	PLXND1
GO_Biological_Process_2023	Defense Response To Gram-negative Bacterium (GO:0050829)	0.171454	0.269714	5.48152	9.66634	RNASE2
GO_Molecular_Function_2023	Adenyl Ribonucleotide Binding (GO:0032559)	0.180605	0.27438	2.66599	4.56269	EPB42;MYO1F
GO_Biological_Process_2023	Negative Regulation Of Blood Vessel Morphogenesis (GO:2000181)	0.175607	0.274641	5.33673	9.28328	STAB1
GO_Biological_Process_2023	Organonitrogen Compound Catabolic Process (GO:1901565)	0.177676	0.276271	5.26716	9.10056	ANPEP
GO_Biological_Process_2023	Cellular Response To UV (GO:0034644)	0.17974	0.276286	5.19937	8.92339	MMP2
GO_Biological_Process_2023	Response To Insulin (GO:0032868)	0.17974	0.276286	5.19937	8.92339	LPIN2
GO_Molecular_Function_2023	Growth Factor Activity (GO:0008083)	0.192017	0.281369	4.82653	7.9646	CLEC11A
GO_Molecular_Function_2023	Tubulin Binding (GO:0015631)	0.192328	0.281369	2.55599	4.21368	FHDC1;EML3
GO_Biological_Process_2023	Positive Regulation Of Cellular Process (GO:0048522)	0.185247	0.283133	2.09083	3.52528	CLEC11A;HBB;HBA1
GO_Biological_Process_2023	Macromolecule Catabolic Process (GO:0009057)	0.192017	0.286711	4.82653	7.9646	RNASE2
GO_Biological_Process_2023	Positive Regulation Of Amide Metabolic Process (GO:0034250)	0.192017	0.286711	4.82653	7.9646	VIM
GO_Biological_Process_2023	Defense Response To Gram-positive Bacterium (GO:0050830)	0.192017	0.286711	4.82653	7.9646	RNASE2
GO_Biological_Process_2023	Integrin-Mediated Signaling Pathway (GO:0007229)	0.192017	0.286711	4.82653	7.9646	PRAM1
GO_Biological_Process_2023	Exocytosis (GO:0006887)	0.194046	0.286711	4.76951	7.82038	ANK1
GO_Biological_Process_2023	Negative Regulation Of Angiogenesis (GO:0016525)	0.194046	0.286711	4.76951	7.82038	STAB1
GO_Biological_Process_2023	Intracellular Protein Transport (GO:0006886)	0.195049	0.286711	2.53186	4.13835	ARL4A;HOMER3
GO_Biological_Process_2023	Organic Anion Transport (GO:0015711)	0.200101	0.290958	4.60622	7.41108	SLC4A1
GO_Biological_Process_2023	Cellular Response To Peptide Hormone Stimulus (GO:0071375)	0.200101	0.290958	4.60622	7.41108	LPIN2
GO_Molecular_Function_2023	Endopeptidase Activity (GO:0004175)	0.204154	0.293239	2.45458	3.90004	MMP2;TPSAB1
GO_Molecular_Function_2023	Phosphatidylinositol Bisphosphate Binding (GO:1902936)	0.208106	0.293579	4.40506	6.91464	CAPG
GO_Biological_Process_2023	Positive Regulation Of Binding (GO:0051099)	0.204114	0.295197	4.5034	7.15626	CLIC2
GO_Cellular_Component_2023	Spindle (GO:0005819)	0.096903	0.299938	3.95473	9.23051	CAPG;EML3
GO_Biological_Process_2023	Cell Junction Assembly (GO:0034329)	0.21208	0.301849	4.3109	6.68532	PLXND1
GO_Biological_Process_2023	T Cell Receptor Signaling Pathway (GO:0050852)	0.21208	0.301849	4.3109	6.68532	PRAM1
GO_Biological_Process_2023	Muscle Contraction (GO:0006936)	0.210095	0.301849	4.35747	6.7985	TMOD1
GO_Biological_Process_2023	Phosphatidylinositol Biosynthetic Process (GO:0006661)	0.218003	0.30703	4.17694	6.36252	CISH
GO_Biological_Process_2023	Positive Regulation Of Protein-Containing Complex Assembly (GO:0031334)	0.218003	0.30703	4.17694	6.36252	CAPG
GO_Biological_Process_2023	Cellular Response To Insulin Stimulus (GO:0032869)	0.219967	0.308183	4.13411	6.26019	LPIN2
GO_Molecular_Function_2023	Metalloendopeptidase Activity (GO:0004222)	0.223882	0.310292	4.05102	6.06291	MMP2
GO_Molecular_Function_2023	Carboxylic Ester Hydrolase Activity (GO:0052689)	0.229718	0.312892	3.93244	5.78423	CA1
GO_Molecular_Function_2023	Phosphatase Binding (GO:0019902)	0.245071	0.328146	3.64755	5.1292	ANK1
GO_Biological_Process_2023	Monoatomic Ion Transport (GO:0006811)	0.235511	0.328251	3.82056	5.52453	SLC4A1
GO_Biological_Process_2023	Positive Regulation Of Translation (GO:0045727)	0.237432	0.329223	3.78467	5.44187	VIM
GO_Molecular_Function_2023	Protein Phosphatase Binding (GO:0019903)	0.250751	0.330156	3.55102	4.91211	ANK1
GO_Biological_Process_2023	RNA Metabolic Process (GO:0016070)	0.243169	0.333736	3.68089	5.20478	RNASE2
GO_Biological_Process_2023	Mitotic Sister Chromatid Segregation (GO:0000070)	0.243169	0.333736	3.68089	5.20478	EML3
GO_Biological_Process_2023	Cellular Response To Molecule Of Bacterial Origin (GO:0071219)	0.254514	0.346576	3.48944	4.77495	VIM
GO_Biological_Process_2023	Regulation Of Small GTPase Mediated Signal Transduction (GO:0051056)	0.256389	0.346576	3.45945	4.70851	ARHGAP4
GO_Biological_Process_2023	Positive Regulation Of Cell Projection Organization (GO:0031346)	0.256389	0.346576	3.45945	4.70851	PLXND1
GO_Biological_Process_2023	Fatty Acid Metabolic Process (GO:0006631)	0.263842	0.35035	3.34441	4.45611	LPIN2
GO_Biological_Process_2023	Positive Regulation Of Macromolecule Biosynthetic Process (GO:0010557)	0.263842	0.35035	3.34441	4.45611	VIM
GO_Biological_Process_2023	Receptor-Mediated Endocytosis (GO:0006898)	0.263842	0.35035	3.34441	4.45611	STAB1
GO_Biological_Process_2023	Organonitrogen Compound Biosynthetic Process (GO:1901566)	0.265693	0.35035	3.31683	4.39617	ALAS2
GO_Biological_Process_2023	Regulation Of Cell Motility (GO:2000145)	0.265693	0.35035	3.31683	4.39617	PLXND1
GO_Biological_Process_2023	Cellular Response To Lipopolysaccharide (GO:0071222)	0.26754	0.351065	3.2897	4.33741	VIM
GO_Cellular_Component_2023	Lysosome (GO:0005764)	0.130842	0.351816	2.48298	5.04979	ANPEP;NKG7;MPO
GO_Cellular_Component_2023	Tertiary Granule Lumen (GO:1904724)	0.124393	0.351816	7.80926	16.2769	HBB
GO_Cellular_Component_2023	Extracellular Membrane-Bounded Organelle (GO:0065010)	0.133141	0.351816	7.25	14.6185	PHOSPHO1
GO_Cellular_Component_2023	Microvillus (GO:0005902)	0.135314	0.351816	7.12245	14.246	MYO1F
GO_Cellular_Component_2023	Endoplasmic Reticulum Lumen (GO:0005788)	0.158419	0.35186	2.90603	5.35439	LGALS1;IGFBP7
GO_Cellular_Component_2023	Neuron Projection (GO:0043005)	0.162397	0.35186	2.23473	4.0621	HOMER3;VIM;ANK1
GO_Cellular_Component_2023	Cortical Cytoskeleton (GO:0030863)	0.146101	0.35186	6.54641	12.5918	SLC4A1
GO_Cellular_Component_2023	Spindle Microtubule (GO:0005876)	0.156756	0.35186	6.05635	11.2228	EML3
GO_Cellular_Component_2023	Intermediate Filament (GO:0005882)	0.158871	0.35186	5.96699	10.9772	VIM
GO_Biological_Process_2023	Protein-Containing Complex Organization (GO:0043933)	0.271221	0.354167	3.23673	4.22336	CAPG
GO_Biological_Process_2023	Regulation Of Anatomical Structure Morphogenesis (GO:0022603)	0.273054	0.354839	3.21088	4.168	PLXND1
GO_Biological_Process_2023	Vesicle-Mediated Transport (GO:0016192)	0.274452	0.35494	1.99073	2.57397	ARL4A;ANK1
GO_Biological_Process_2023	Protein Targeting (GO:0006605)	0.276708	0.356146	3.1604	4.06045	HOMER3
GO_Biological_Process_2023	Golgi Organization (GO:0007030)	0.278528	0.356781	3.13574	4.00822	FHDC1
GO_Biological_Process_2023	Synapse Organization (GO:0050808)	0.280343	0.357405	3.11146	3.95697	PLXND1
GO_Biological_Process_2023	Negative Regulation Of Cell Motility (GO:2000146)	0.283961	0.360309	3.06401	3.85734	ARHGAP4
GO_Biological_Process_2023	Antigen Receptor-Mediated Signaling Pathway (GO:0050851)	0.285763	0.360893	3.04082	3.8089	PRAM1
GO_Biological_Process_2023	Non-Membrane-Bounded Organelle Assembly (GO:0140694)	0.287561	0.361466	3.01797	3.76136	TMOD1
GO_Biological_Process_2023	Nervous System Development (GO:0007399)	0.294905	0.368422	1.88699	2.30421	PLXND1;CAPG
GO_Biological_Process_2023	Regulation Of Cell Migration (GO:0030334)	0.295833	0.368422	1.88252	2.29284	PLXND1;ARHGAP4
GO_Biological_Process_2023	Ras Protein Signal Transduction (GO:0007265)	0.303541	0.376279	2.82674	3.37015	ARHGAP4
GO_Biological_Process_2023	Defense Response To Symbiont (GO:0140546)	0.31053	0.383177	2.74927	3.2152	RNASE2
GO_Biological_Process_2023	Axon Guidance (GO:0007411)	0.312267	0.383561	2.73056	3.17809	PLXND1
GO_Molecular_Function_2023	G Protein-Coupled Receptor Binding (GO:0001664)	0.296482	0.383969	2.90868	3.53627	HOMER3
GO_Cellular_Component_2023	Intermediate Filament Cytoskeleton (GO:0045111)	0.183852	0.385497	5.06888	8.58476	VIM
GO_Cellular_Component_2023	Actin-Based Cell Projection (GO:0098858)	0.189983	0.385904	4.88493	8.11298	MYO1F
GO_Biological_Process_2023	Regulation Of Cellular Component Organization (GO:0051128)	0.31917	0.390258	2.65816	3.03571	CISH
GO_Biological_Process_2023	Response To Lipopolysaccharide (GO:0032496)	0.329398	0.400941	2.55645	2.8389	VIM
GO_Molecular_Function_2023	Transition Metal Ion Binding (GO:0046914)	0.316218	0.402923	1.78928	2.06004	ANPEP;SOD3
GO_Cellular_Component_2023	Golgi Lumen (GO:0005796)	0.221927	0.40341	4.09215	6.16035	SOD3
GO_Cellular_Component_2023	Phagocytic Vesicle (GO:0045335)	0.221927	0.40341	4.09215	6.16035	MPO
GO_Cellular_Component_2023	Microtubule Cytoskeleton (GO:0015630)	0.210557	0.40341	2.40319	3.74416	FHDC1;EML3
GO_Cellular_Component_2023	Lysosomal Membrane (GO:0005765)	0.223427	0.40341	2.3065	3.45668	ANPEP;NKG7
GO_Biological_Process_2023	Negative Regulation Of Cell Migration (GO:0030336)	0.336133	0.407296	2.49282	2.71779	ARHGAP4
GO_Biological_Process_2023	Positive Regulation Of I-kappaB kinase/NF-kappaB Signaling (GO:0043123)	0.355942	0.429365	2.31949	2.39601	LGALS1
GO_Biological_Process_2023	Negative Regulation Of Cytokine Production (GO:0001818)	0.360803	0.433285	2.27983	2.32412	HOMER3
GO_Biological_Process_2023	Macromolecule Biosynthetic Process (GO:0009059)	0.368825	0.44095	2.21664	2.21095	ALAS2
GO_Cellular_Component_2023	Ficolin-1-Rich Granule Lumen (GO:1904813)	0.265693	0.445901	3.31683	4.39617	HBB
GO_Cellular_Component_2023	Cytoplasmic Side Of Plasma Membrane (GO:0009898)	0.26754	0.445901	3.2897	4.33741	ANK1
GO_Cellular_Component_2023	Cytoplasmic Vesicle Membrane (GO:0030659)	0.253991	0.445901	2.10627	2.88655	ANPEP;STAB1
GO_Biological_Process_2023	Defense Response To Virus (GO:0051607)	0.378321	0.448203	2.14525	2.08521	RNASE2
GO_Biological_Process_2023	Endocytosis (GO:0006897)	0.378321	0.448203	2.14525	2.08521	STAB1
GO_Biological_Process_2023	Intracellular Monoatomic Cation Homeostasis (GO:0030003)	0.37989	0.448203	2.13379	2.06524	ALAS2
GO_Cellular_Component_2023	Peroxisome (GO:0005777)	0.276708	0.44965	3.1604	4.06045	VIM
GO_Cellular_Component_2023	Asymmetric Synapse (GO:0032279)	0.283961	0.450182	3.06401	3.85734	HOMER3
GO_Biological_Process_2023	Regulation Of Signal Transduction (GO:0009966)	0.384574	0.451748	2.10013	2.00692	IGFBP7
GO_Biological_Process_2023	Regulation Of Programmed Cell Death (GO:0043067)	0.387677	0.453251	2.07827	1.96933	LGALS1
GO_Biological_Process_2023	Positive Regulation Of Protein Metabolic Process (GO:0051247)	0.389223	0.453251	2.0675	1.9509	VIM
GO_Biological_Process_2023	Regulation Of Translation (GO:0006417)	0.398418	0.461959	2.00518	1.84527	VIM
GO_Cellular_Component_2023	Postsynaptic Density (GO:0014069)	0.315727	0.466415	2.69388	3.10571	HOMER3
GO_Cellular_Component_2023	Nucleolus (GO:0005730)	0.303244	0.466415	1.59425	1.90228	SELENBP1;ARL4A;CAPG
GO_Cellular_Component_2023	Nuclear Lumen (GO:0031981)	0.309453	0.466415	1.57504	1.84745	SELENBP1;ARL4A;CAPG
GO_Biological_Process_2023	Protein Stabilization (GO:0050821)	0.407478	0.470436	1.94647	1.74748	AHSP
GO_Cellular_Component_2023	Endocytic Vesicle Membrane (GO:0030666)	0.329398	0.4726	2.55645	2.8389	STAB1
GO_Cellular_Component_2023	Tertiary Granule (GO:0070820)	0.334455	0.4726	2.50843	2.74736	HBB
GO_Biological_Process_2023	Regulation Of GTPase Activity (GO:0043087)	0.416403	0.478686	1.89106	1.65676	PLXND1
GO_Biological_Process_2023	Regulation Of Cell Growth (GO:0001558)	0.435293	0.495688	1.78111	1.48141	CISH
GO_Biological_Process_2023	Cellular Response To Lipid (GO:0071396)	0.436721	0.495688	1.77317	1.469	VIM
GO_Biological_Process_2023	Cilium Organization (GO:0044782)	0.436721	0.495688	1.77317	1.469	FHDC1
GO_Molecular_Function_2023	GTP Binding (GO:0005525)	0.396895	0.497694	2.01531	1.86231	ARL4A
GO_Biological_Process_2023	Regulation Of I-kappaB kinase/NF-kappaB Signaling (GO:0043122)	0.442398	0.500021	1.74212	1.42078	LGALS1
GO_Molecular_Function_2023	GTPase Activator Activity (GO:0005096)	0.411957	0.50851	1.91837	1.70128	ARHGAP4
GO_Cellular_Component_2023	Ficolin-1-Rich Granule (GO:0101002)	0.370417	0.512279	2.20442	2.18926	HBB
GO_Biological_Process_2023	Cilium Assembly (GO:0060271)	0.457721	0.515175	1.662	1.29885	FHDC1
GO_Biological_Process_2023	Positive Regulation Of Programmed Cell Death (GO:0043068)	0.460462	0.516101	1.64821	1.27823	LGALS1
GO_Molecular_Function_2023	Transcription Regulatory Region Nucleic Acid Binding (GO:0001067)	0.430988	0.519319	1.80534	1.51951	KLF1
GO_Molecular_Function_2023	Guanyl Ribonucleotide Binding (GO:0032561)	0.433862	0.519319	1.78912	1.49396	ARL4A
GO_Biological_Process_2023	Cellular Component Assembly (GO:0022607)	0.480594	0.53643	1.55157	1.13689	CAPG
GO_Cellular_Component_2023	Axon (GO:0030424)	0.402965	0.545681	1.97539	1.79544	VIM
GO_Biological_Process_2023	Positive Regulation Of Apoptotic Process (GO:0043065)	0.493604	0.548675	1.49313	1.05419	LGALS1
GO_Biological_Process_2023	Chemical Synaptic Transmission (GO:0007268)	0.497444	0.550669	1.47644	1.03096	TSPOAP1
GO_Biological_Process_2023	Plasma Membrane Bounded Cell Projection Assembly (GO:0120031)	0.499989	0.551217	1.46551	1.01585	FHDC1
GO_Biological_Process_2023	Central Nervous System Development (GO:0007417)	0.51004	0.556822	1.42336	0.958299	CAPG
GO_Biological_Process_2023	Transmembrane Receptor Protein Tyrosine Kinase Signaling Pathway (GO:0007169)	0.511283	0.556822	1.41826	0.951414	MMP2
GO_Biological_Process_2023	Inorganic Cation Transmembrane Transport (GO:0098662)	0.511283	0.556822	1.41826	0.951414	RHCE
GO_Cellular_Component_2023	Lytic Vacuole (GO:0000323)	0.429546	0.569805	1.81357	1.53252	MPO
GO_Biological_Process_2023	Regulation Of Intracellular Signal Transduction (GO:1902531)	0.527157	0.571795	1.35507	0.867596	ARHGAP4
GO_Biological_Process_2023	Regulation Of Apoptotic Process (GO:0042981)	0.530332	0.572929	1.14077	0.723533	LGALS1;MPO
GO_Cellular_Component_2023	Vesicle (GO:0031982)	0.446618	0.579858	1.71952	1.38602	MYO1F
GO_Cellular_Component_2023	trans-Golgi Network (GO:0005802)	0.454966	0.579858	1.67602	1.31992	TGFBI
GO_Molecular_Function_2023	Protein Homodimerization Activity (GO:0042803)	0.496387	0.585292	1.2178	0.852949	SMIM1;SLC4A1
GO_Biological_Process_2023	Protein Transport (GO:0015031)	0.546002	0.587498	1.28454	0.777316	ARL4A
GO_Cellular_Component_2023	Cilium (GO:0005929)	0.476627	0.595784	1.56999	1.1634	FHDC1
GO_Biological_Process_2023	Organelle Assembly (GO:0070925)	0.556276	0.596168	1.24795	0.73191	FHDC1
GO_Biological_Process_2023	Protein-Containing Complex Assembly (GO:0065003)	0.562999	0.600979	1.22468	0.703549	CAPG
GO_Cellular_Component_2023	Dendrite (GO:0030425)	0.493604	0.605363	1.49313	1.05419	HOMER3
GO_Cellular_Component_2023	Secretory Granule Membrane (GO:0030667)	0.50504	0.607918	1.44413	0.986515	ANPEP
GO_Cellular_Component_2023	Lytic Vacuole Membrane (GO:0098852)	0.514992	0.608627	1.40317	0.931148	ANPEP
GO_Biological_Process_2023	Regulation Of Cell Population Proliferation (GO:0042127)	0.575856	0.612274	1.04636	0.577482	CLEC11A;IGFBP7
GO_Biological_Process_2023	Protein Localization (GO:0008104)	0.587857	0.622573	1.14286	0.607167	ARL4A
GO_Molecular_Function_2023	Receptor Ligand Activity (GO:0048018)	0.552877	0.633004	1.25992	0.746651	CLEC11A
GO_Molecular_Function_2023	Cadherin Binding (GO:0045296)	0.552877	0.633004	1.25992	0.746651	CAPG
GO_Biological_Process_2023	Negative Regulation Of Cell Population Proliferation (GO:0008285)	0.616254	0.649601	1.05669	0.511538	IGFBP7
GO_Biological_Process_2023	Negative Regulation Of Programmed Cell Death (GO:0043069)	0.618208	0.649601	1.05102	0.505468	MPO
GO_Molecular_Function_2023	Zinc Ion Binding (GO:0008270)	0.577224	0.651439	1.17707	0.646829	ANPEP
GO_Biological_Process_2023	Cellular Response To Oxygen-Containing Compound (GO:1901701)	0.641818	0.671786	0.984883	0.436748	VIM
GO_Cellular_Component_2023	Mitochondrial Matrix (GO:0005759)	0.592037	0.676024	1.12971	0.592181	ALAS2
GO_Cellular_Component_2023	Mitochondrial Inner Membrane (GO:0005743)	0.607343	0.676024	1.08296	0.540031	ALAS2
GO_Cellular_Component_2023	Focal Adhesion (GO:0005925)	0.62401	0.676024	1.03437	0.487796	VIM
GO_Cellular_Component_2023	Bounding Membrane Of Organelle (GO:0098588)	0.612823	0.676024	0.975775	0.477817	ANPEP;STAB1
GO_Cellular_Component_2023	Cell-Substrate Junction (GO:0030055)	0.631611	0.676024	1.01295	0.465432	VIM
GO_Cellular_Component_2023	Organelle Inner Membrane (GO:0019866)	0.634423	0.676024	1.00514	0.457379	ALAS2
GO_Biological_Process_2023	Regulation Of Nucleic Acid-Templated Transcription (GO:1903506)	0.681579	0.710638	0.882348	0.338242	KLF1
GO_Biological_Process_2023	Positive Regulation Of Gene Expression (GO:0010628)	0.703628	0.727537	0.829577	0.291601	VIM
GO_Biological_Process_2023	Negative Regulation Of Apoptotic Process (GO:0043066)	0.705144	0.727537	0.826043	0.28858	MPO
GO_Biological_Process_2023	Positive Regulation Of Cell Population Proliferation (GO:0008284)	0.7059	0.727537	0.824287	0.287084	CLEC11A
GO_Molecular_Function_2023	GTPase Regulator Activity (GO:0030695)	0.657924	0.732057	0.942105	0.394426	ARHGAP4
GO_Molecular_Function_2023	Kinase Binding (GO:0019900)	0.688038	0.75493	0.866613	0.324037	PRAM1
GO_Biological_Process_2023	Positive Regulation Of Intracellular Signal Transduction (GO:1902533)	0.735968	0.755631	0.756582	0.231945	LGALS1
GO_Molecular_Function_2023	Transcription Cis-Regulatory Region Binding (GO:0000976)	0.699033	0.756488	0.840359	0.300897	KLF1
GO_Biological_Process_2023	Positive Regulation Of Nucleic Acid-Templated Transcription (GO:1903508)	0.756834	0.7741	0.711863	0.198333	KLF1
GO_Molecular_Function_2023	Protein Kinase Binding (GO:0019901)	0.726296	0.77537	0.777911	0.248774	PRAM1
GO_Cellular_Component_2023	Mitochondrial Membrane (GO:0031966)	0.745959	0.782053	0.734959	0.215405	ALAS2
GO_Biological_Process_2023	Positive Regulation Of DNA-templated Transcription (GO:0045893)	0.825979	0.841622	0.628156	0.120095	LPIN2;KLF1
GO_Biological_Process_2023	Protein Modification Process (GO:0036211)	0.836692	0.849322	0.553032	0.0986051	EPB42
GO_Molecular_Function_2023	Sequence-Specific Double-Stranded DNA Binding (GO:1990837)	0.838379	0.883093	0.54982	0.096925	KLF1
GO_Cellular_Component_2023	Endoplasmic Reticulum Membrane (GO:0005789)	0.870782	0.898426	0.48852	0.0675935	LPIN2
GO_Molecular_Function_2023	RNA Binding (GO:0003723)	0.876688	0.911294	0.548291	0.0721571	LGALS1;VIM
GO_Biological_Process_2023	Positive Regulation Of Transcription By RNA Polymerase II (GO:0045944)	0.909714	0.919974	0.414109	0.039185	LPIN2
GO_Biological_Process_2023	Regulation Of Gene Expression (GO:0010468)	0.945176	0.952256	0.341175	0.0192368	KLF1
GO_Molecular_Function_2023	Cis-Regulatory Region Sequence-Specific DNA Binding (GO:0000987)	0.940796	0.956553	0.350734	0.021405	KLF1
GO_Molecular_Function_2023	RNA Polymerase II Cis-Regulatory Region Sequence-Specific DNA Binding (GO:0000978)	0.944444	0.956553	0.342788	0.0195933	KLF1
GO_Molecular_Function_2023	RNA Polymerase II Transcription Regulatory Region Sequence-Specific DNA Binding (GO:0000977)	0.957755	0.957755	0.312225	0.0134767	KLF1
GO_Cellular_Component_2023	Nucleus (GO:0005634)	0.952125	0.967002	0.562137	0.0275777	ARL4A;CAPG;CLIC2;LPIN2;MPO;EML3;KLF1
GO_Biological_Process_2023	Regulation Of Transcription By RNA Polymerase II (GO:0006357)	0.968475	0.972089	0.368625	0.0118081	LPIN2;KLF1
GO_Cellular_Component_2023	Intracellular Membrane-Bounded Organelle (GO:0043231)	0.986181	0.986181	0.465629	0.00647943	ARL4A;CAPG;CLIC2;LPIN2;MPO;EML3;KLF1
GO_Biological_Process_2023	Regulation Of DNA-templated Transcription (GO:0006355)	0.993642	0.993642	0.191535	0.00122174	KLF1
